# Supplementary material for: Hydantoanabaenopeptins from Lake Kinneret Microcystis Bloom, Isolation, and Structure Elucidation of the Possible Intermediates in the Anabaenopeptins Biosynthesis
Source: MDPI journal article supplement (doi:10.3390/md21070401), 2023-07-13

**Hydantoanabaenopeptins from Lake Kinneret *Microcystis* Bloom,  
Isolation, and Structure Elucidation of the Possible Intermediates in the  
Anabaenopeptins Biosynthesis**

Supplementary Material

# Table of Content

| Page  | Titel                                                                                                              |
|-------|--------------------------------------------------------------------------------------------------------------------|
| S2-S5 | Table of Content                                                                                                   |
| S6    | Figure S1. <sup>1</sup> H NMR Spectrum of Hydanto-anabaenopeptin A ( <b>1</b> ) in DMSO- <i>d</i> <sub>6</sub>     |
| S7    | Figure S2. <sup>13</sup> C NMR Spectrum of Hydanto-anabaenopeptin A ( <b>1</b> ) in DMSO- <i>d</i> <sub>6</sub>    |
| S8    | Figure S3. HSQC Spectrum of Hydanto-anabaenopeptin A ( <b>1</b> ) in DMSO- <i>d</i> <sub>6</sub>                   |
| S9    | Figure S4. HMBC Spectrum of Hydanto-anabaenopeptin A ( <b>1</b> ) in DMSO- <i>d</i> <sub>6</sub>                   |
| S10   | Figure S5. COSY Spectrum of Hydanto-anabaenopeptin A ( <b>1</b> ) in DMSO- <i>d</i> <sub>6</sub>                   |
| S11   | Figure S6. TOCSY Spectrum of Hydanto-anabaenopeptin A ( <b>1</b> ) in DMSO- <i>d</i> <sub>6</sub>                  |
| S12   | Figure S7. ROESY Spectrum of Hydanto-anabaenopeptin A ( <b>1</b> ) in DMSO- <i>d</i> <sub>6</sub>                  |
| S13   | Figure S8. Negative HR ESI MS of Hydanto-anabaenopeptin A ( <b>1</b> )                                             |
| S14   | Figure S9. Positive HR ESI MS/MS Spectrum of Hydanto-anabaenopeptin A ( <b>1</b> )                                 |
| S15   | Figure S10. Scheme of Fragmentation in the Positive HR ESI MS/MS Spectrum of Hydanto-anabaenopeptin A ( <b>1</b> ) |
| S16   | Figure S11. LCMS Traces of Marfey's Method Amino Acids Analysis of Hydanto-anabaenopeptin A ( <b>1</b> )           |
| S17   | Table S1. NMR Data of Hydanto-anabaenopeptin A ( <b>1</b> ) in DMSO- <i>d</i> <sub>6</sub>                         |
| S21   | Figure S12. LCMS Chromatogram and Mass spectrum of Hydanto-anabaenopeptin A ( <b>1</b> )                           |
| S22   | Figure S13. <sup>1</sup> H NMR Spectrum of Hydanto-anabaenopeptin B ( <b>2</b> ) in DMSO- <i>d</i> <sub>6</sub>    |
| S23   | Figure S14. <sup>13</sup> C NMR Spectrum of Hydanto-anabaenopeptin B ( <b>2</b> ) in DMSO- <i>d</i> <sub>6</sub>   |
| S24   | Figure S15. HSQC Spectrum of Hydanto-anabaenopeptin B ( <b>2</b> ) in DMSO- <i>d</i> <sub>6</sub>                  |
| S25   | Figure S16. HMBC Spectrum of Hydanto-anabaenopeptin B ( <b>2</b> ) in DMSO- <i>d</i> <sub>6</sub>                  |
| S26   | Figure S17. COSY Spectrum of Hydanto-anabaenopeptin B ( <b>2</b> ) in DMSO- <i>d</i> <sub>6</sub>                  |
| S27   | Figure S18. TOCSY Spectrum of Hydanto-anabaenopeptin B ( <b>2</b> ) in DMSO- <i>d</i> <sub>6</sub>                 |
| S28   | Figure S19. ROESY Spectrum of Hydanto-anabaenopeptin B ( <b>2</b> ) in DMSO- <i>d</i> <sub>6</sub>                 |
| S29   | Figure S20. Negative HR ESI MS of Hydanto-anabaenopeptin B ( <b>2</b> )                                            |
| S30   | Figure S21. Positive HR ESI MS/MS Spectrum of Hydanto-anabaenopeptin B ( <b>2</b> )                                |
| S31   | Figure S22. Scheme of Fragmentation in the Positive HR ESI MS/MS Spectrum of Hydanto-anabaenopeptin B ( <b>2</b> ) |
| S32   | Figure S23. LCMS Traces of Marfey's Method Amino Acids Analysis of Hydanto-anabaenopeptin B ( <b>2</b> )           |
| S33   | Table S2. NMR Data of Hydanto-anabaenopeptin B ( <b>2</b> ) in DMSO- <i>d</i> <sub>6</sub>                         |
| S36   | Figure S24. LCMS Chromatogram and Mass spectrum of Hydanto-anabaenopeptin B ( <b>2</b> )                           |
| S37   | Figure S25. <sup>1</sup> H NMR Spectrum of Hydanto-anabaenopeptin F ( <b>3</b> ) in DMSO- <i>d</i> <sub>6</sub>    |
| S38   | Figure S26. <sup>13</sup> C NMR Spectrum of Hydanto-anabaenopeptin F ( <b>3</b> ) in DMSO- <i>d</i> <sub>6</sub>   |

|     |                                                                                                                             |
|-----|-----------------------------------------------------------------------------------------------------------------------------|
| S39 | Figure S27. HSQC Spectrum of Hydanto-anabaenopeptin F ( <b>3</b> ) in DMSO- <i>d</i> <sub>6</sub>                           |
| S40 | Figure S28. HMBC Spectrum of Hydanto-anabaenopeptin F ( <b>3</b> ) in DMSO- <i>d</i> <sub>6</sub>                           |
| S41 | Figure S29. COSY Spectrum of Hydanto-anabaenopeptin F ( <b>3</b> ) in DMSO- <i>d</i> <sub>6</sub>                           |
| S42 | Figure S30. TOCSY Spectrum of Hydanto-anabaenopeptin F ( <b>3</b> ) in DMSO- <i>d</i> <sub>6</sub>                          |
| S43 | Figure S31. ROESY Spectrum of Hydanto-anabaenopeptin F ( <b>3</b> ) in DMSO- <i>d</i> <sub>6</sub>                          |
| S44 | Figure S32. Negative HR ESI MS of Hydanto-anabaenopeptin F ( <b>3</b> )                                                     |
| S45 | Figure S33. Positive HR ESI MS/MS Spectrum of Hydanto-anabaenopeptin F ( <b>3</b> )                                         |
| S46 | Figure S34. Scheme of Fragmentation in the Positive HR ESI MS/MS Spectrum of Hydanto-anabaenopeptin F ( <b>3</b> )          |
| S47 | Figure S35. LCMS Traces of Marfey's Method Amino Acids Analysis of Hydanto-anabaenopeptin F ( <b>3</b> )                    |
| S48 | Table S3. NMR Data of Hydanto-anabaenopeptin F ( <b>3</b> ) in DMSO- <i>d</i> <sub>6</sub>                                  |
| S52 | Figure S36. LCMS Chromatogram and Mass spectrum of Hydanto-anabaenopeptin F ( <b>3</b> )                                    |
| S53 | Figure S37. <sup>1</sup> H NMR Spectrum of Hydanto-oscillamide Y ( <b>4</b> ) in DMSO- <i>d</i> <sub>6</sub>                |
| S54 | Figure S38. <sup>13</sup> C NMR Spectrum of Hydanto-oscillamide Y ( <b>4</b> ) in DMSO- <i>d</i> <sub>6</sub>               |
| S55 | Figure S39. HSQC Spectrum of Hydanto-oscillamide n Y ( <b>4</b> ) in DMSO- <i>d</i> <sub>6</sub>                            |
| S56 | Figure S40. HMBC Spectrum of Hydanto-oscillamide Y ( <b>4</b> ) in DMSO- <i>d</i> <sub>6</sub>                              |
| S57 | Figure S41. COSY Spectrum of Hydanto-oscillamide Y ( <b>4</b> ) in DMSO- <i>d</i> <sub>6</sub>                              |
| S58 | Figure S42. TOCSY Spectrum of Hydanto-oscillamide Y ( <b>4</b> ) in DMSO- <i>d</i> <sub>6</sub>                             |
| S59 | Figure S43. ROESY Spectrum of Hydanto-oscillamide Y ( <b>4</b> ) in DMSO- <i>d</i> <sub>6</sub>                             |
| S60 | Figure S44. Negative HR ESI MS of Hydanto-oscillamide Y ( <b>4</b> )                                                        |
| S61 | Figure S45. Positive HR ESI MS/MS Spectrum of Hydanto-oscillamide Y ( <b>4</b> )                                            |
| S62 | Figure S46. Scheme of Fragmentation in the Positive HR ESI MS/MS Spectrum of Hydanto-oscillamide Y ( <b>4</b> )             |
| S63 | Figure S47. LCMS Traces of Marfey's Method Amino Acids Analysis of Hydanto-oscillamide Y ( <b>4</b> )                       |
| S64 | Table S4. NMR Data of Hydanto-oscillamide Y ( <b>4</b> ) in DMSO- <i>d</i> <sub>6</sub>                                     |
| S67 | Figure S48. LCMS Chromatogram and Mass spectrum of Hydanto-oscillamide Y ( <b>4</b> )                                       |
| S68 | Figure S49. <sup>1</sup> H NMR Spectrum of <sup>1</sup> [Dht]-Anabaenopeptin A ( <b>5</b> ) in DMSO- <i>d</i> <sub>6</sub>  |
| S69 | Figure S50. <sup>13</sup> C NMR Spectrum of <sup>1</sup> [Dht]-Anabaenopeptin A ( <b>5</b> ) in DMSO- <i>d</i> <sub>6</sub> |
| S70 | Figure S51. HSQC Spectrum of <sup>1</sup> [Dht]-Anabaenopeptin A ( <b>5</b> ) in DMSO- <i>d</i> <sub>6</sub>                |
| S71 | Figure S52. HMBC Spectrum of <sup>1</sup> [Dht]-Anabaenopeptin A ( <b>5</b> ) in DMSO- <i>d</i> <sub>6</sub>                |
| S72 | Figure S53. COSY Spectrum of <sup>1</sup> [Dht]-Anabaenopeptin A ( <b>5</b> ) in DMSO- <i>d</i> <sub>6</sub>                |
| S73 | Figure S54. TOCSY Spectrum of <sup>1</sup> [Dht]-Anabaenopeptin A ( <b>5</b> ) in DMSO- <i>d</i> <sub>6</sub>               |
| S74 | Figure S55. ROESY Spectrum of <sup>1</sup> [Dht]-Anabaenopeptin A ( <b>5</b> ) in DMSO- <i>d</i> <sub>6</sub>               |
| S75 | Figure S56. Positive HR ESI MS of <sup>1</sup> [Dht]-Anabaenopeptin A ( <b>5</b> )                                          |

|      |                                                                                                                                      |
|------|--------------------------------------------------------------------------------------------------------------------------------------|
| S76  | Figure S57. Positive HR ESI MS/MS Spectrum of <sup>1</sup> [Dht]-Anabaenopeptin A ( <b>5</b> )                                       |
| S77  | Figure S58. Scheme of Fragmentation in the Positive HR ESI MS/MS Spectrum of <sup>1</sup> [Dht]-Anabaenopeptin A ( <b>5</b> )        |
| S78  | Figure S59. LCMS Traces of Marfey's Method Amino Acids Analysis of <sup>1</sup> [Dht]-Anabaenopeptin A ( <b>5</b> )                  |
| S79  | Table S5. NMR Data of <sup>1</sup> [Dht]-Anabaenopeptin A ( <b>5</b> ) in DMSO- <i>d</i> <sub>6</sub>                                |
| S82  | Figure S60. LCMS Chromatogram and Mass spectrum of <sup>1</sup> [Dht]-Anabaenopeptin A ( <b>5</b> )                                  |
| S83  | Figure S61. <sup>1</sup> H NMR Spectrum of Hydanto- <sup>1</sup> [Dht]-anabaenopeptin A ( <b>6</b> ) in DMSO- <i>d</i> <sub>6</sub>  |
| S84  | Figure S62. <sup>13</sup> C NMR Spectrum of Hydanto- <sup>1</sup> [Dht]-anabaenopeptin A ( <b>6</b> ) in DMSO- <i>d</i> <sub>6</sub> |
| S85  | Figure S63. HSQC Spectrum of Hydanto- <sup>1</sup> [Dht]-anabaenopeptin A ( <b>6</b> ) in DMSO- <i>d</i> <sub>6</sub>                |
| S86  | Figure S64. HMBC Spectrum of Hydanto- <sup>1</sup> [Dht]-anabaenopeptin A ( <b>6</b> ) in DMSO- <i>d</i> <sub>6</sub>                |
| S87  | Figure S65. COSY Spectrum of Hydanto- <sup>1</sup> [Dht]-anabaenopeptin A ( <b>6</b> ) in DMSO- <i>d</i> <sub>6</sub>                |
| S88  | Figure S66. TOCSY Spectrum of Hydanto- <sup>6</sup> [Dht]-anabaenopeptin A ( <b>6</b> ) in DMSO- <i>d</i> <sub>6</sub>               |
| S89  | Figure S67. ROESY Spectrum of Hydanto- <sup>1</sup> [Dht]-anabaenopeptin A ( <b>6</b> ) in DMSO- <i>d</i> <sub>6</sub>               |
| S90  | Figure S68. Positive HR ESI MS of Hydanto- <sup>1</sup> [Dht]-anabaenopeptin A ( <b>6</b> )                                          |
| S91  | Figure S69. Positive HR ESI MS/MS Spectrum of Hydanto- <sup>1</sup> [Dht]-anabaenopeptin ( <b>6</b> )                                |
| S92  | Figure S70. Scheme of Fragmentation in the Positive HR ESI MS/MS Spectrum of Hydanto- <sup>1</sup> [Dht]-anabaenopeptin ( <b>6</b> ) |
| S93  | Figure S71. LCMS Traces of Marfey's Method Amino Acids Analysis of Hydanto- <sup>1</sup> [Dht]-anabaenopeptin ( <b>6</b> )           |
| S94  | Table S6. NMR Data of Hydanto- <sup>1</sup> [Dht]-anabaenopeptin A ( <b>6</b> ) in DMSO- <i>d</i> <sub>6</sub>                       |
| S97  | Figure S72. LCMS Chromatogram and Mass spectrum of Hydanto- <sup>1</sup> [Dht]-anabaenopeptin A ( <b>6</b> )                         |
| S98  | Figure S73. <sup>1</sup> H NMR Spectrum of Anabaenopeptin A ( <b>7</b> ) in DMSO- <i>d</i> <sub>6</sub>                              |
| S99  | Figure S74. <sup>13</sup> C NMR Spectrum of Anabaenopeptin A ( <b>7</b> ) in DMSO- <i>d</i> <sub>6</sub>                             |
| S100 | Figure S75. Negative HR ESI MS of Anabaenopeptin A ( <b>7</b> )                                                                      |
| S101 | Figure S76. Positive HR ESI MS/MS Spectrum of Anabaenopeptin A ( <b>7</b> )                                                          |
| S102 | Figure S77. Scheme of Fragmentation in the Positive HR ESI MS/MS Spectrum of Anabaenopeptin A ( <b>7</b> )                           |
| S103 | Figure S78. LCMS Traces of Marfey's Method Amino Acids Analysis of Anabaenopeptin A ( <b>7</b> )                                     |
| S104 | Figure S79. LCMS Chromatogram and Mass spectrum of Anabaenopeptin A ( <b>7</b> )                                                     |
| S105 | Figure S80. <sup>1</sup> H NMR Spectrum of Anabaenopeptin B ( <b>8</b> ) in DMSO- <i>d</i> <sub>6</sub>                              |
| S106 | Figure S81. <sup>13</sup> C NMR Spectrum of Anabaenopeptin B ( <b>8</b> ) in DMSO- <i>d</i> <sub>6</sub>                             |
| S107 | Figure S82. Positive HR ESI MS of Anabaenopeptin B ( <b>8</b> )                                                                      |
| S108 | Figure S83. Positive HR ESI MS/MS Spectrum of Anabaenopeptin B ( <b>8</b> )                                                          |
| S109 | Figure S84. Scheme of Fragmentation in the Positive HR ESI MS/MS Spectrum of Anabaenopeptin B ( <b>8</b> )                           |
| S110 | Figure S85. LCMS Traces of Marfey's Method Amino Acids Analysis of Anabaenopeptin B ( <b>8</b> )                                     |
| S111 | Figure S86. LCMS Chromatogram and Mass spectrum of Anabaenopeptin B ( <b>8</b> )                                                     |



|      |                                                                                                            |
|------|------------------------------------------------------------------------------------------------------------|
| S112 | Figure S87. $^1\text{H}$ NMR Spectrum of Anabaenopeptin F ( <b>9</b> ) in $\text{DMSO-}d_6$                |
| S113 | Figure S88. Negative HR ESI MS of Anabaenopeptin F ( <b>9</b> )                                            |
| S114 | Figure S89. Positive HR ESI MS/MS Spectrum of Anabaenopeptin F ( <b>9</b> )                                |
| S115 | Figure S90. Scheme of Fragmentation in the Positive HR ESI MS/MS Spectrum of Anabaenopeptin F ( <b>9</b> ) |
| S116 | Figure S91. LCMS Traces of Marfey's Method Amino Acids Analysis of Anabaenopeptin F ( <b>9</b> )           |
| S117 | Figure S92. LCMS Chromatogram and Mass spectrum of Anabaenopeptin F ( <b>9</b> )                           |
| S118 | Figure S93. $^1\text{H}$ NMR Spectrum of Oscillamide Y ( <b>10</b> ) in $\text{DMSO-}d_6$                  |
| S119 | Figure S94. Negative HR ESI MS of Oscillamide Y ( <b>10</b> )                                              |
| S120 | Figure S95. Positive HR ESI MS/MS Spectrum of Oscillamide Y ( <b>10</b> )                                  |
| S121 | Figure S96. Scheme of Fragmentation in the Positive HR ESI MS/MS Spectrum of Oscillamide Y ( <b>10</b> )   |
| S122 | Figure S97. LCMS Traces of Marfey's Method Amino Acids Analysis of Oscillamide Y ( <b>10</b> )             |
| S123 | Figure S98. LCMS Chromatogram and Mass spectrum of Oscillamide Y ( <b>10</b> )                             |

Figure S1.  $^1\text{H}$  NMR Spectrum of Hydanto-anabaenopeptin A (**1**) in  $\text{DMSO}-d_6$

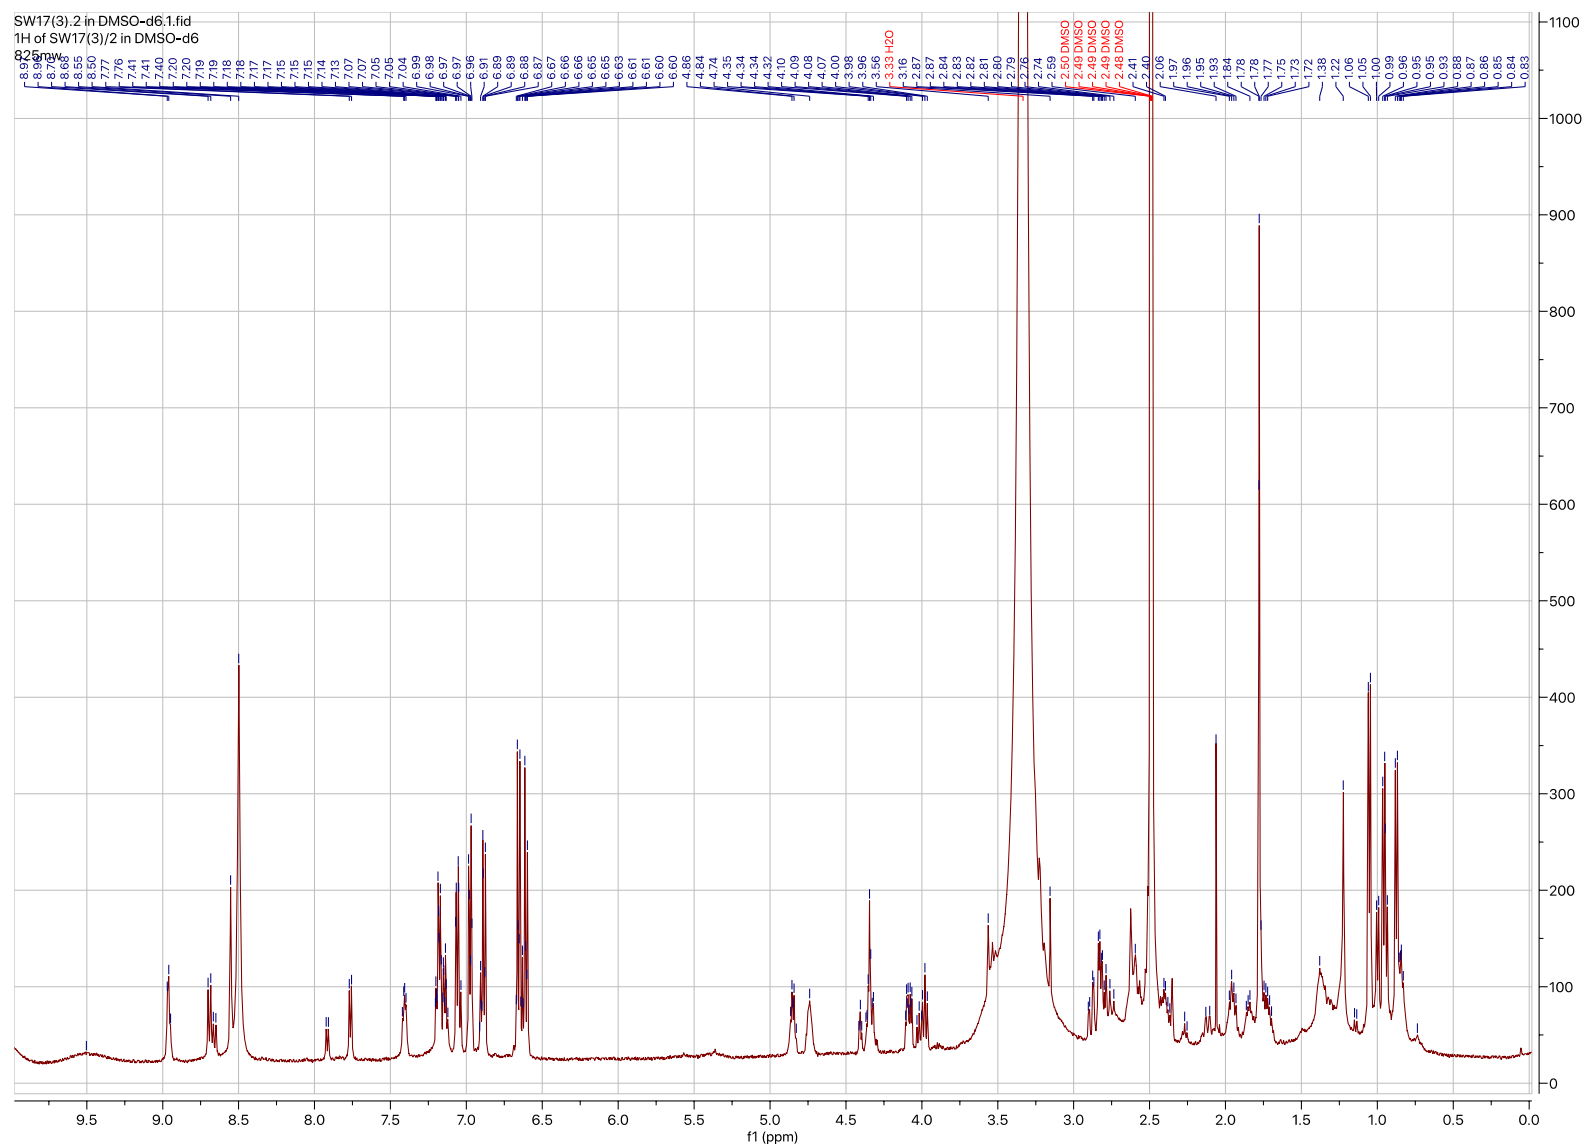

Figure S2.  $^{13}\text{C}$  NMR Spectrum of Hydanto-anabaenopeptin A (**1**) in  $\text{DMSO-}d_6$

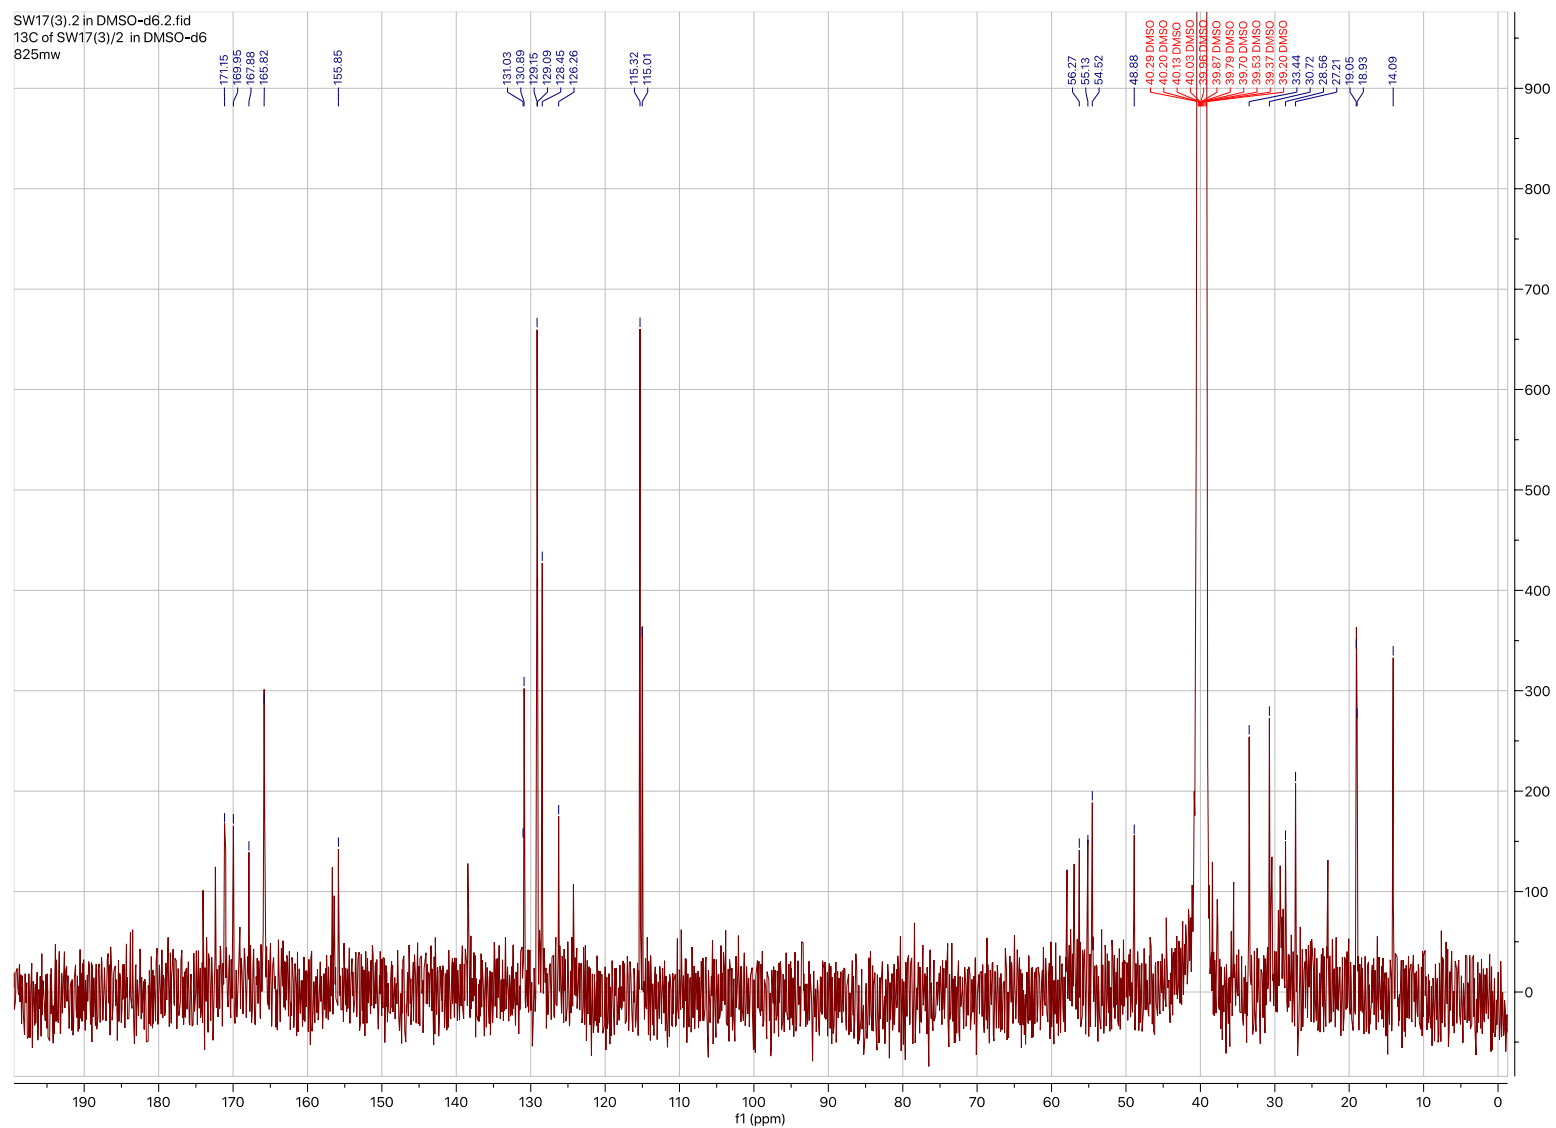

Figure S3. HSQC Spectrum of Hydanto-anabaenopeptin A (**1**) in DMSO-*d*<sub>6</sub>

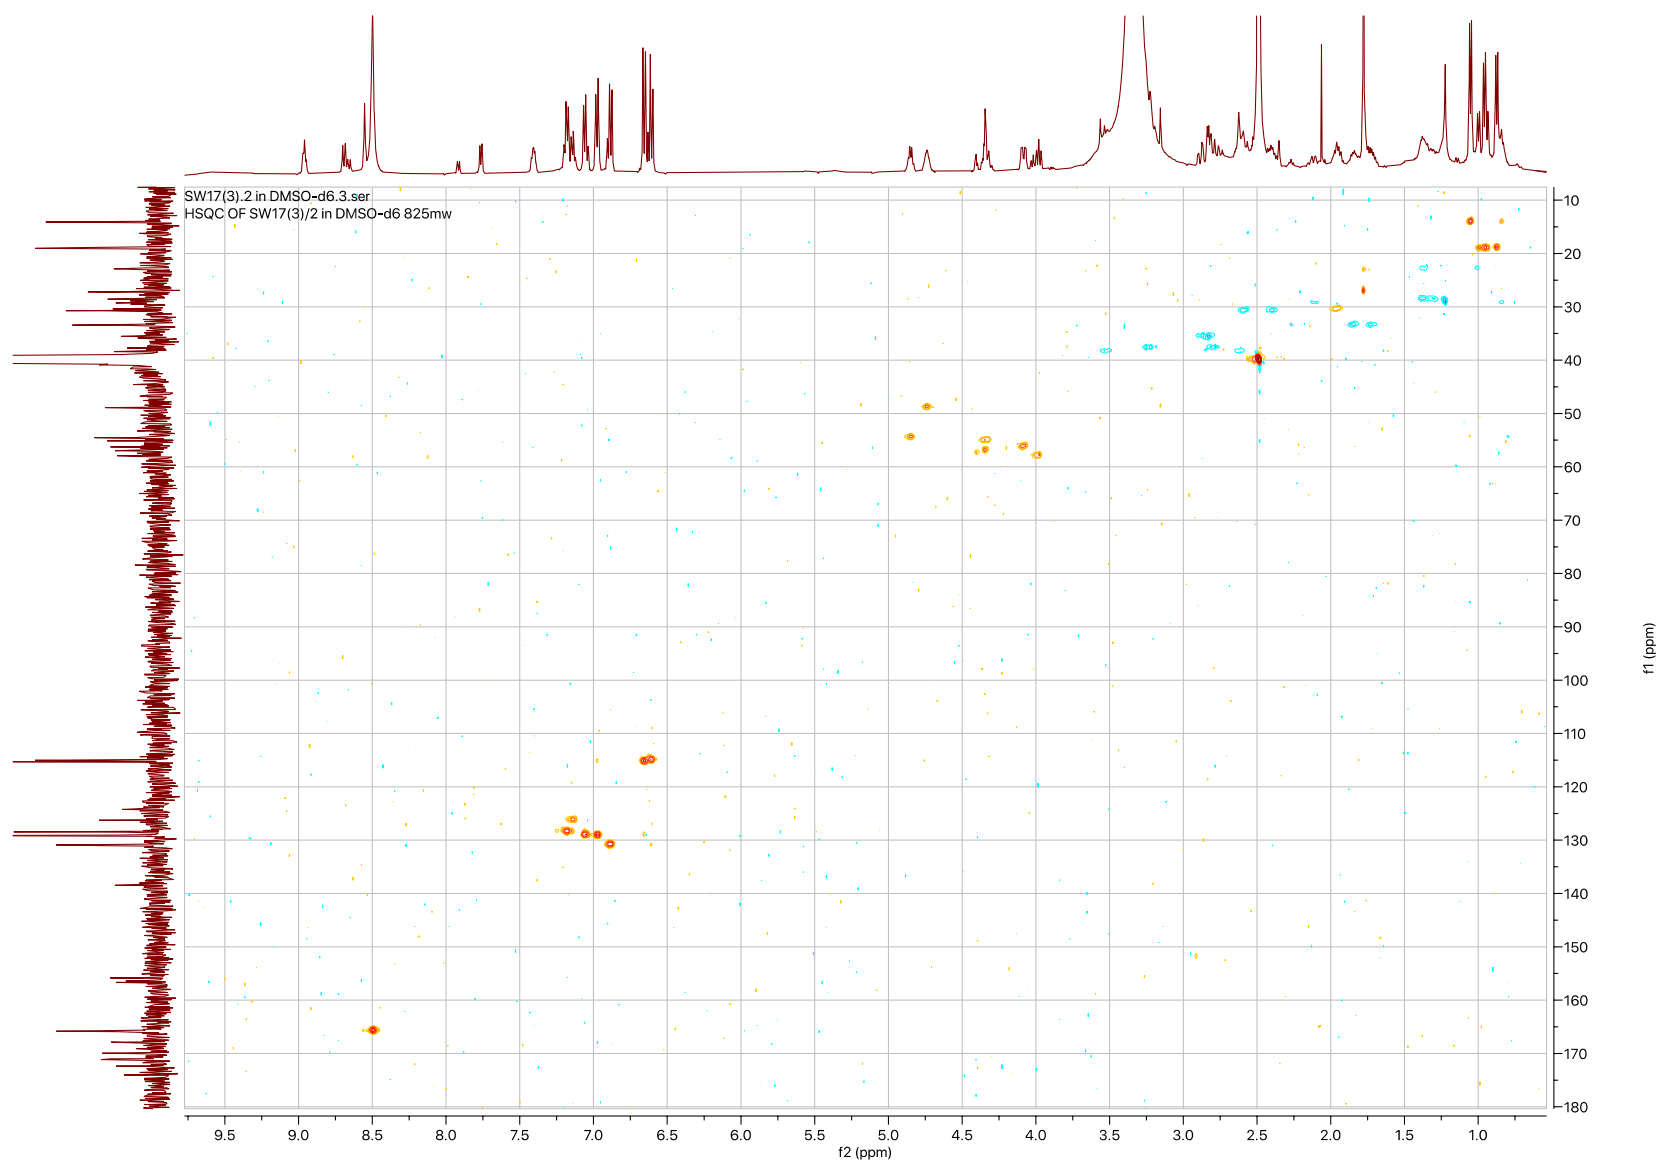

Figure S4. HMBC Spectrum of Hydanto-anabaenopeptin A (**1**) in DMSO-*d*<sub>6</sub>

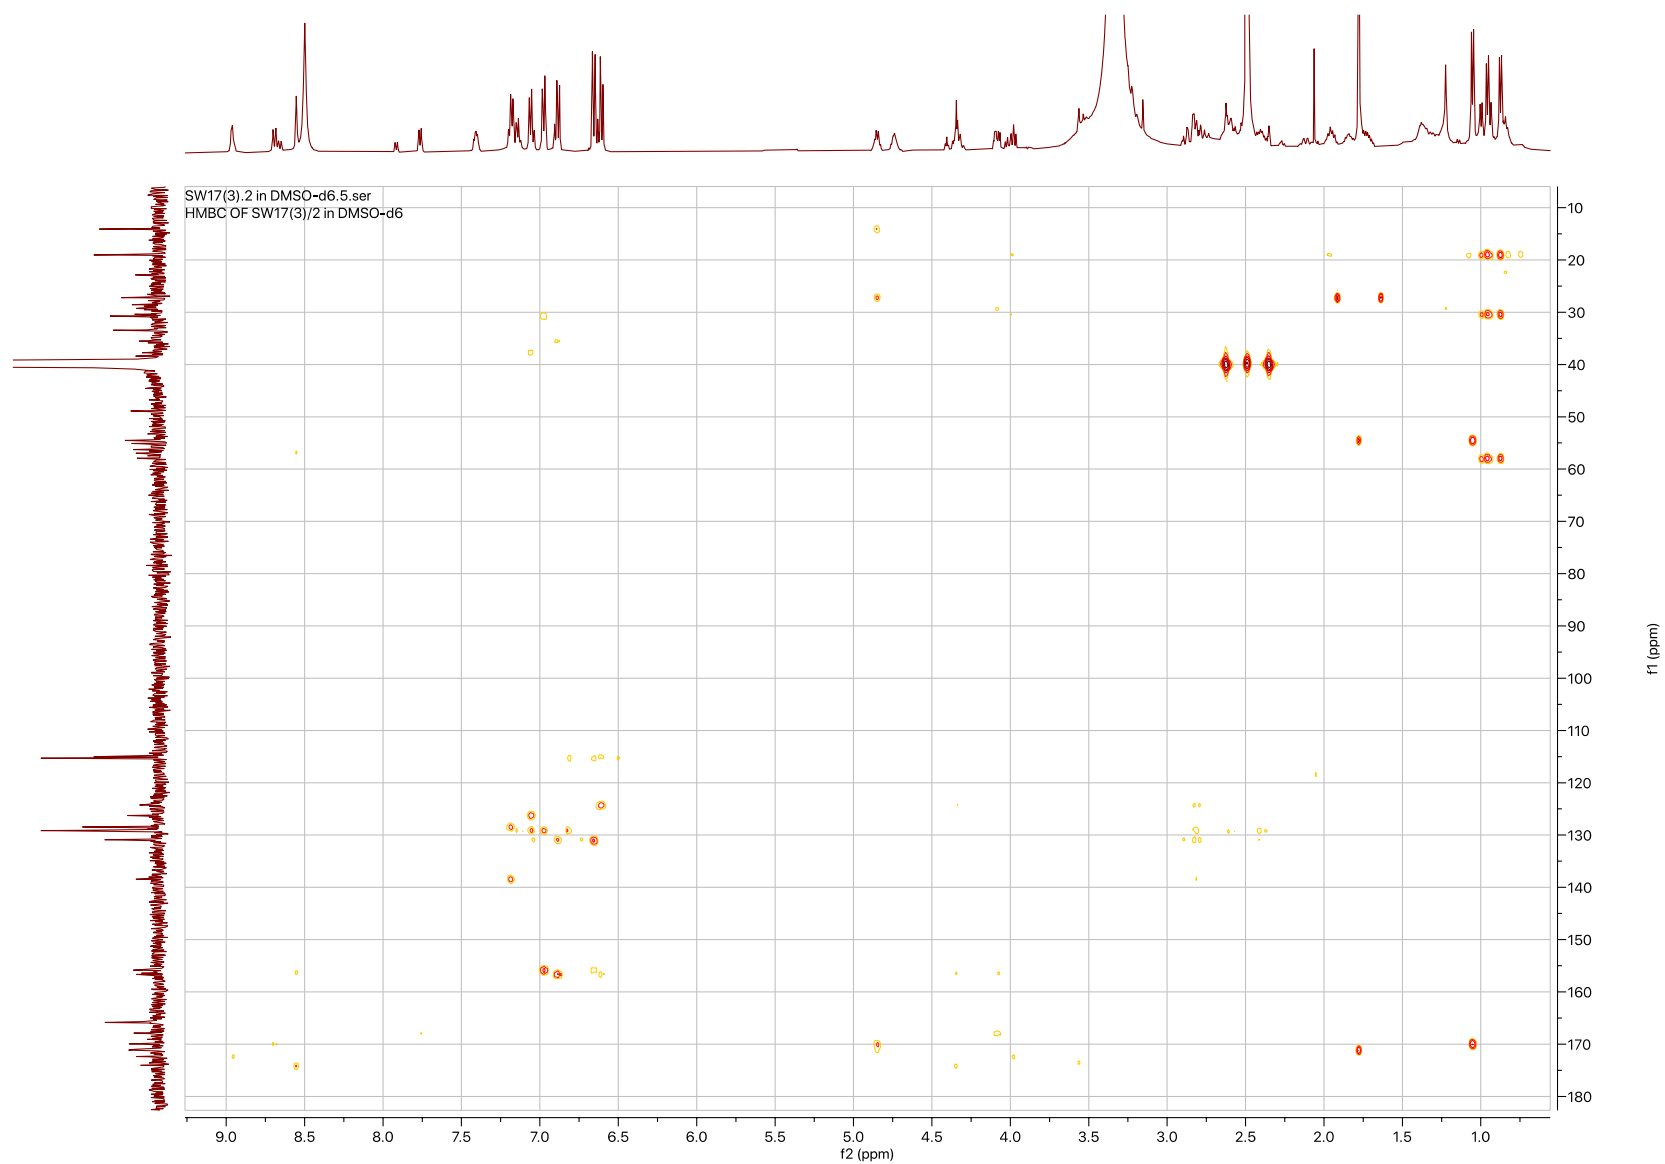

Figure S5. COSY Spectrum of Hydanto-anabaenopeptin A (**1**) in DMSO-*d*<sub>6</sub>

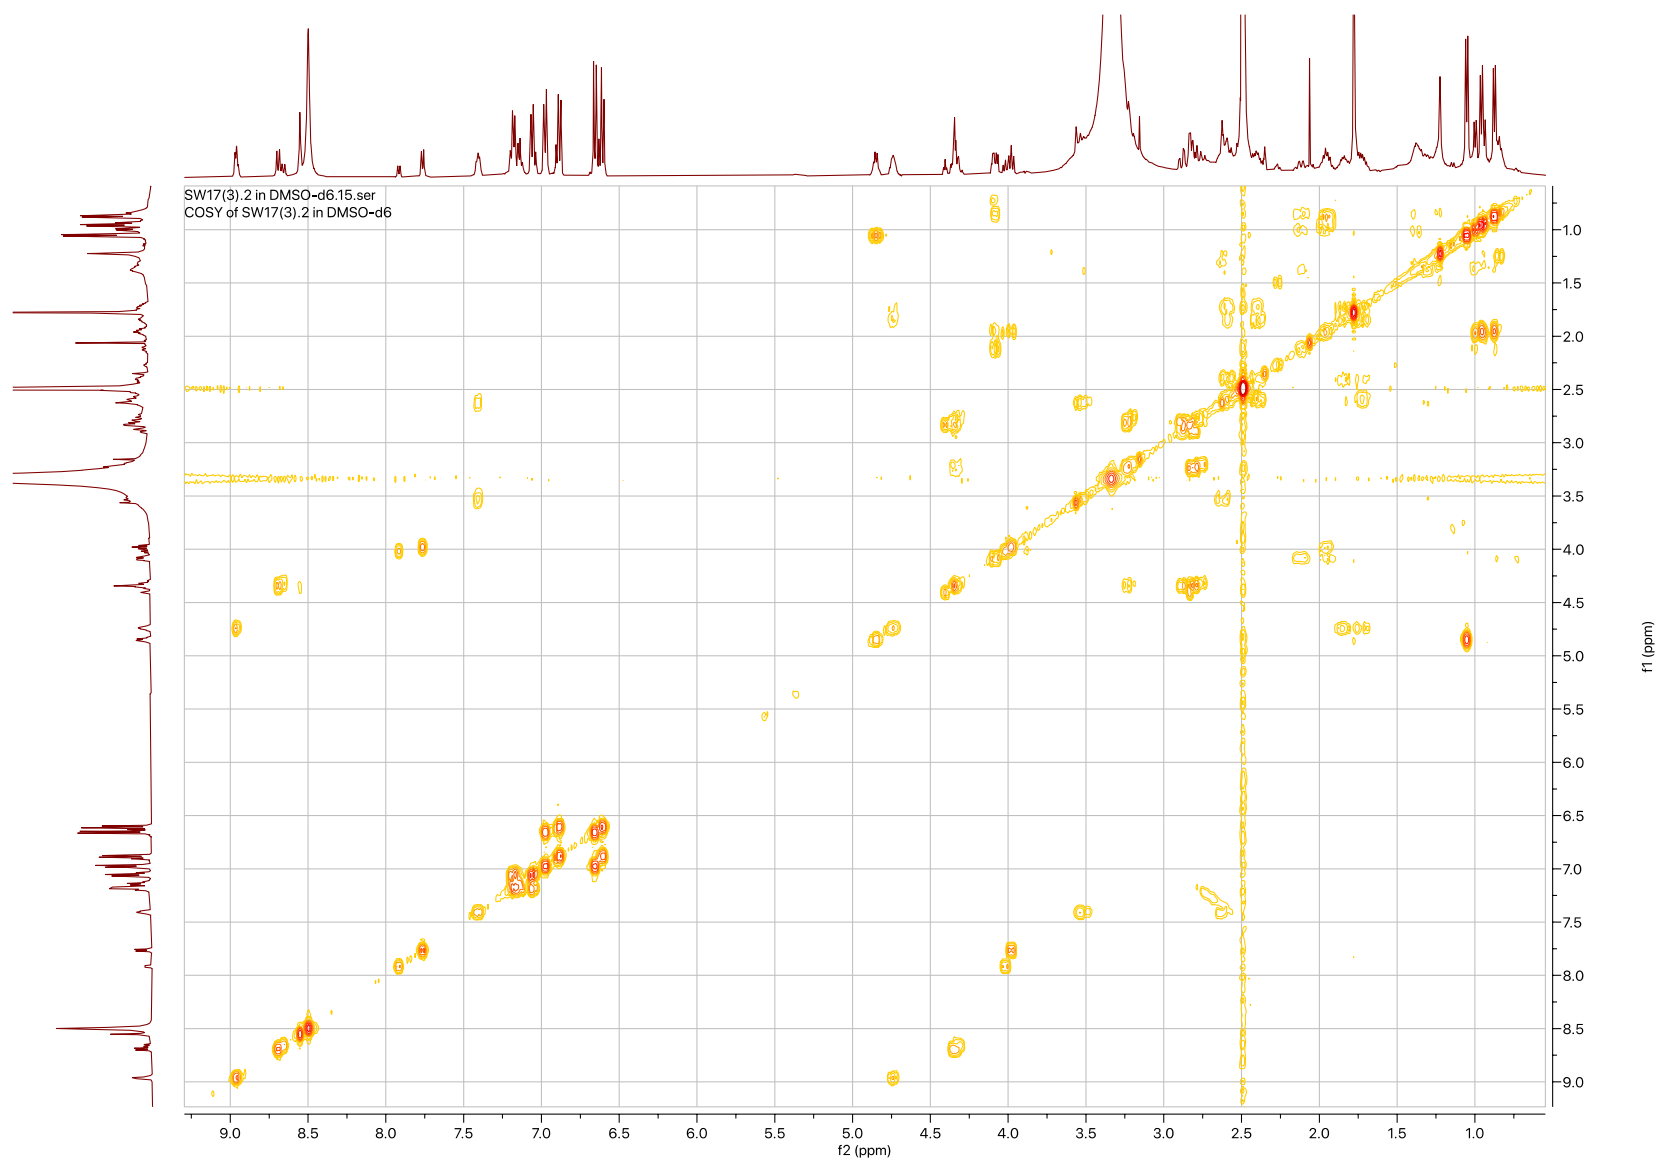

Figure S6. TOCSY Spectrum of Hydanto-anabaenopeptin A (**1**) in DMSO- $d_6$

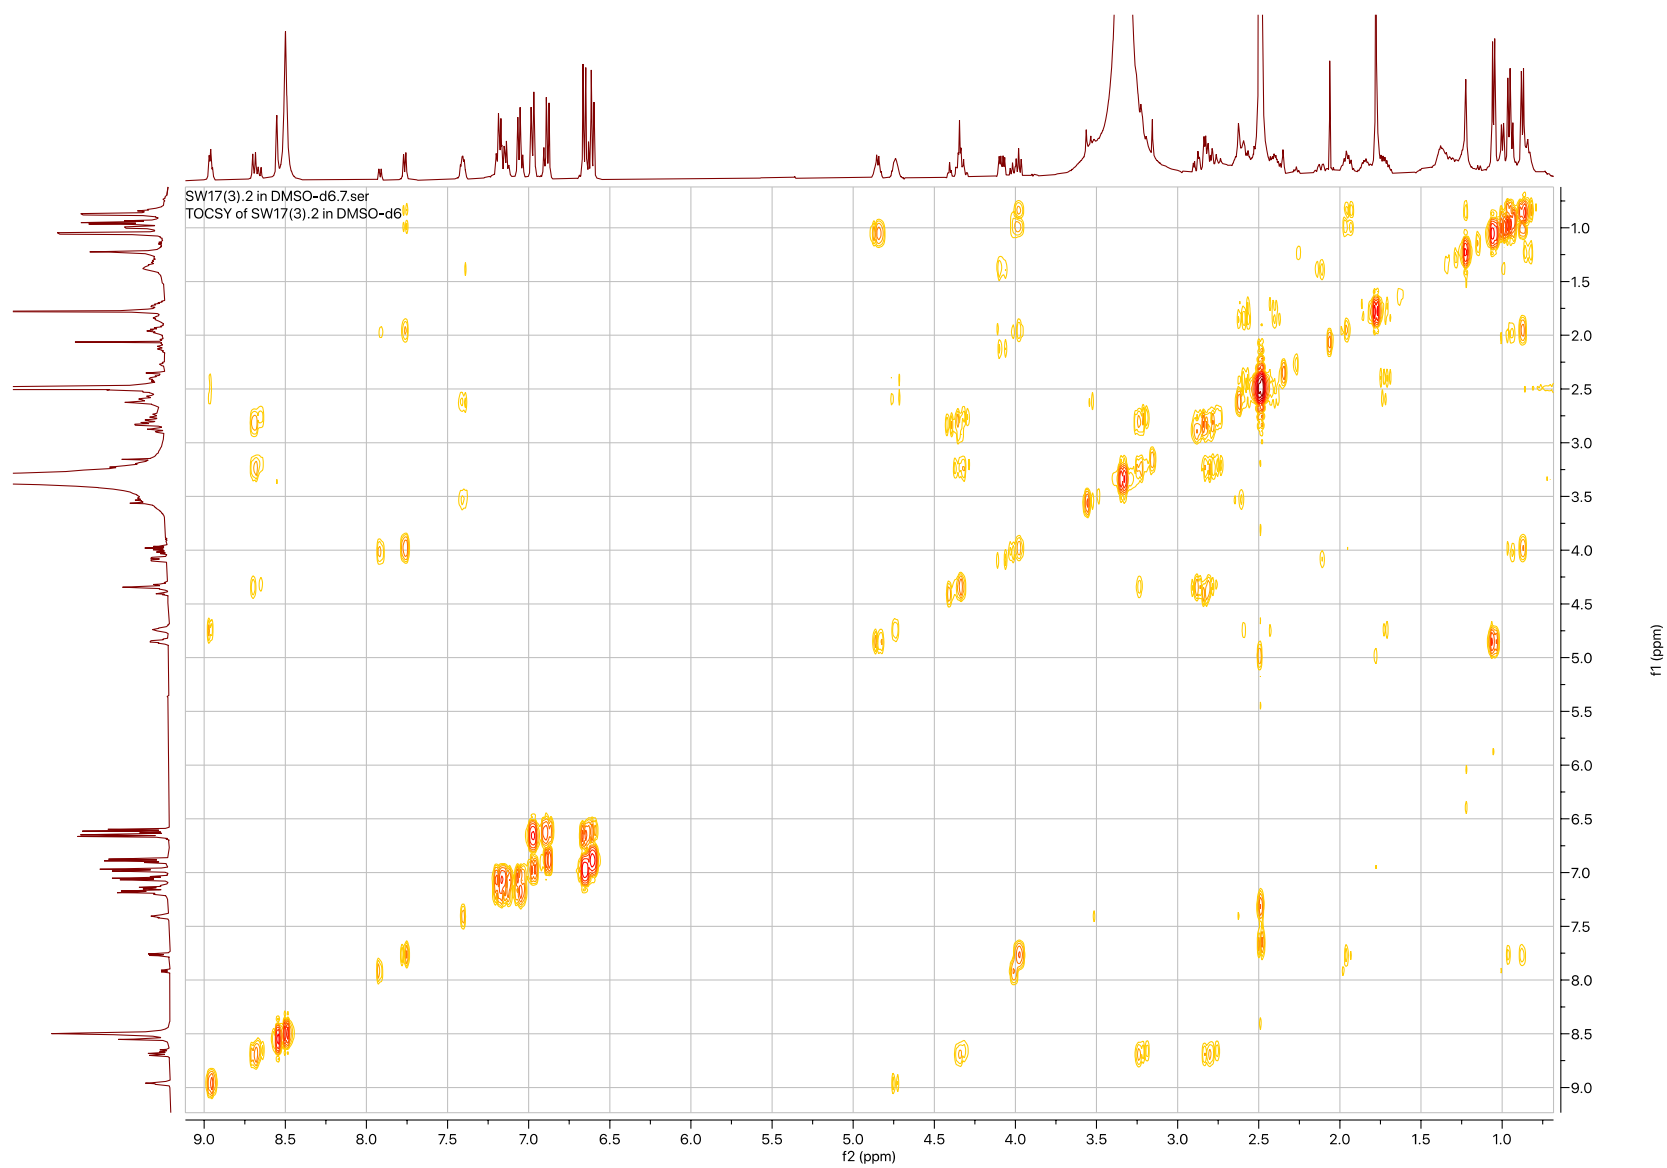

Figure S7. ROESY Spectrum of Hydanto-anabaenopeptin A (**1**) in DMSO- $d_6$

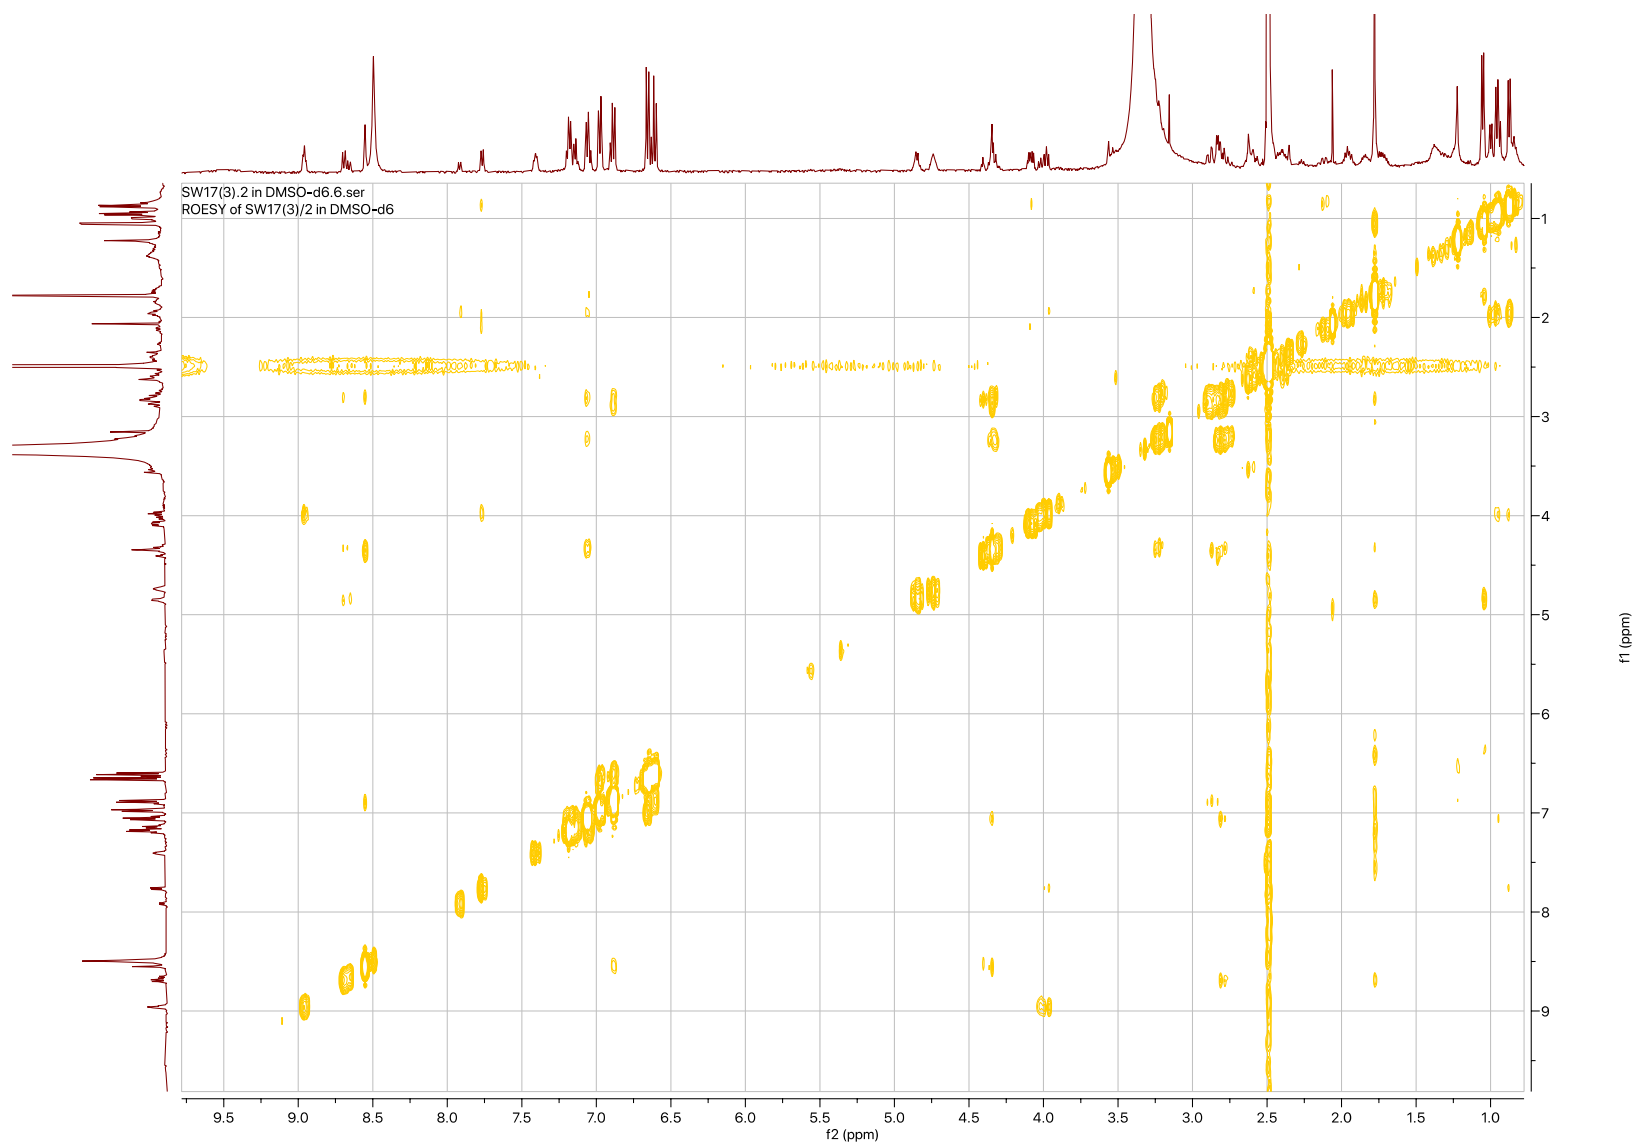



Figure S8. Negative HR ESI MS of Hydanto-anabaenopeptin A (1)

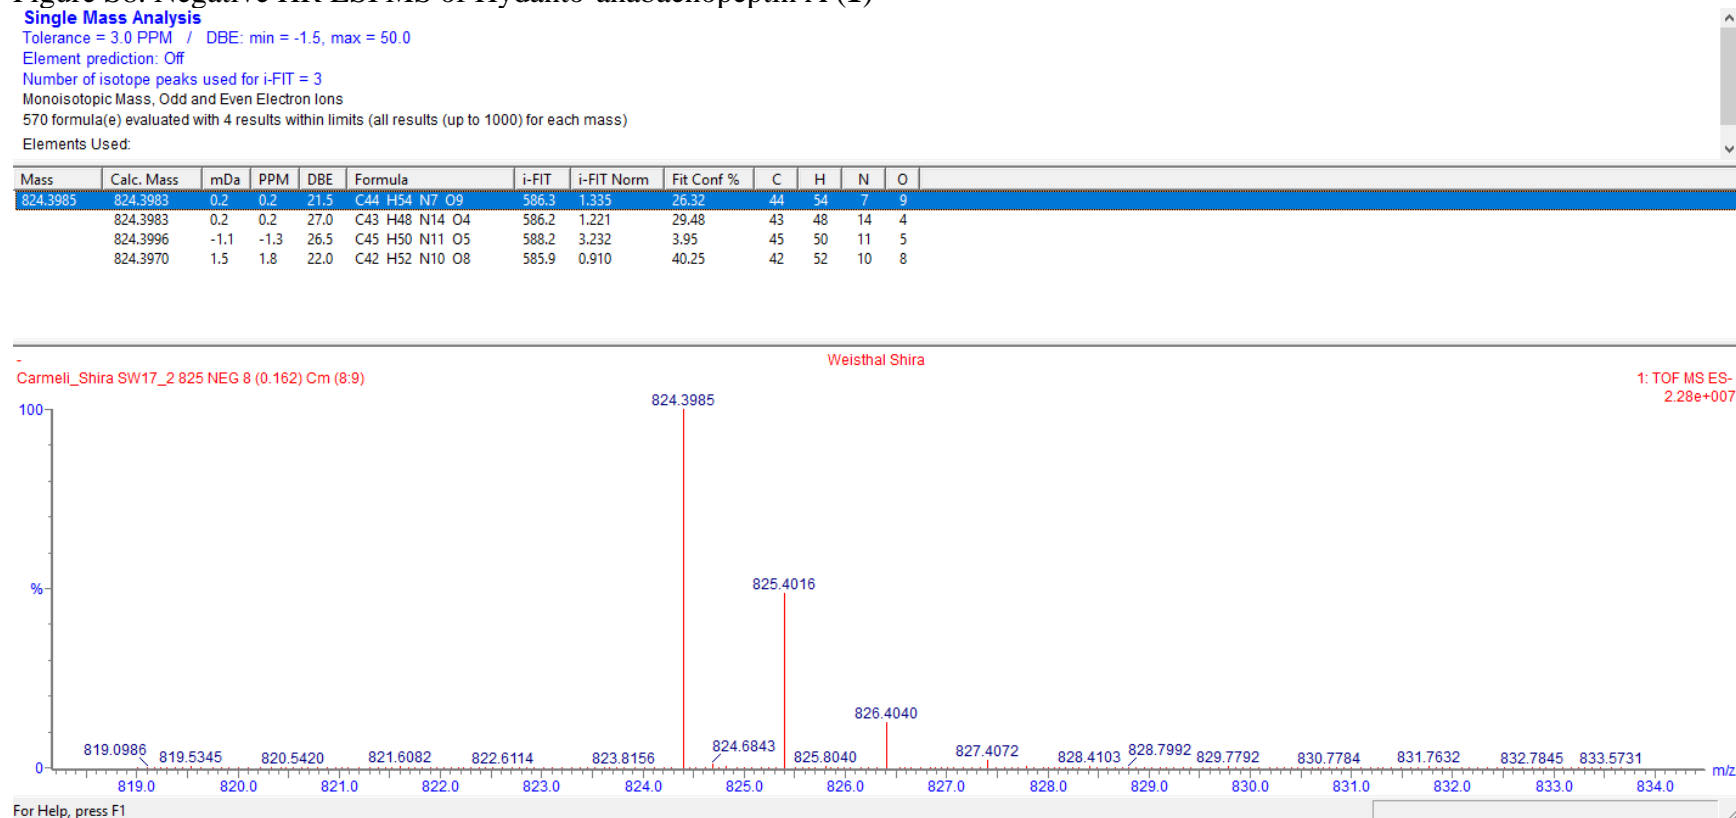

Figure S9. Positive HR ESI MS/MS Spectrum of Hydanto-anabaenopeptin A (1)

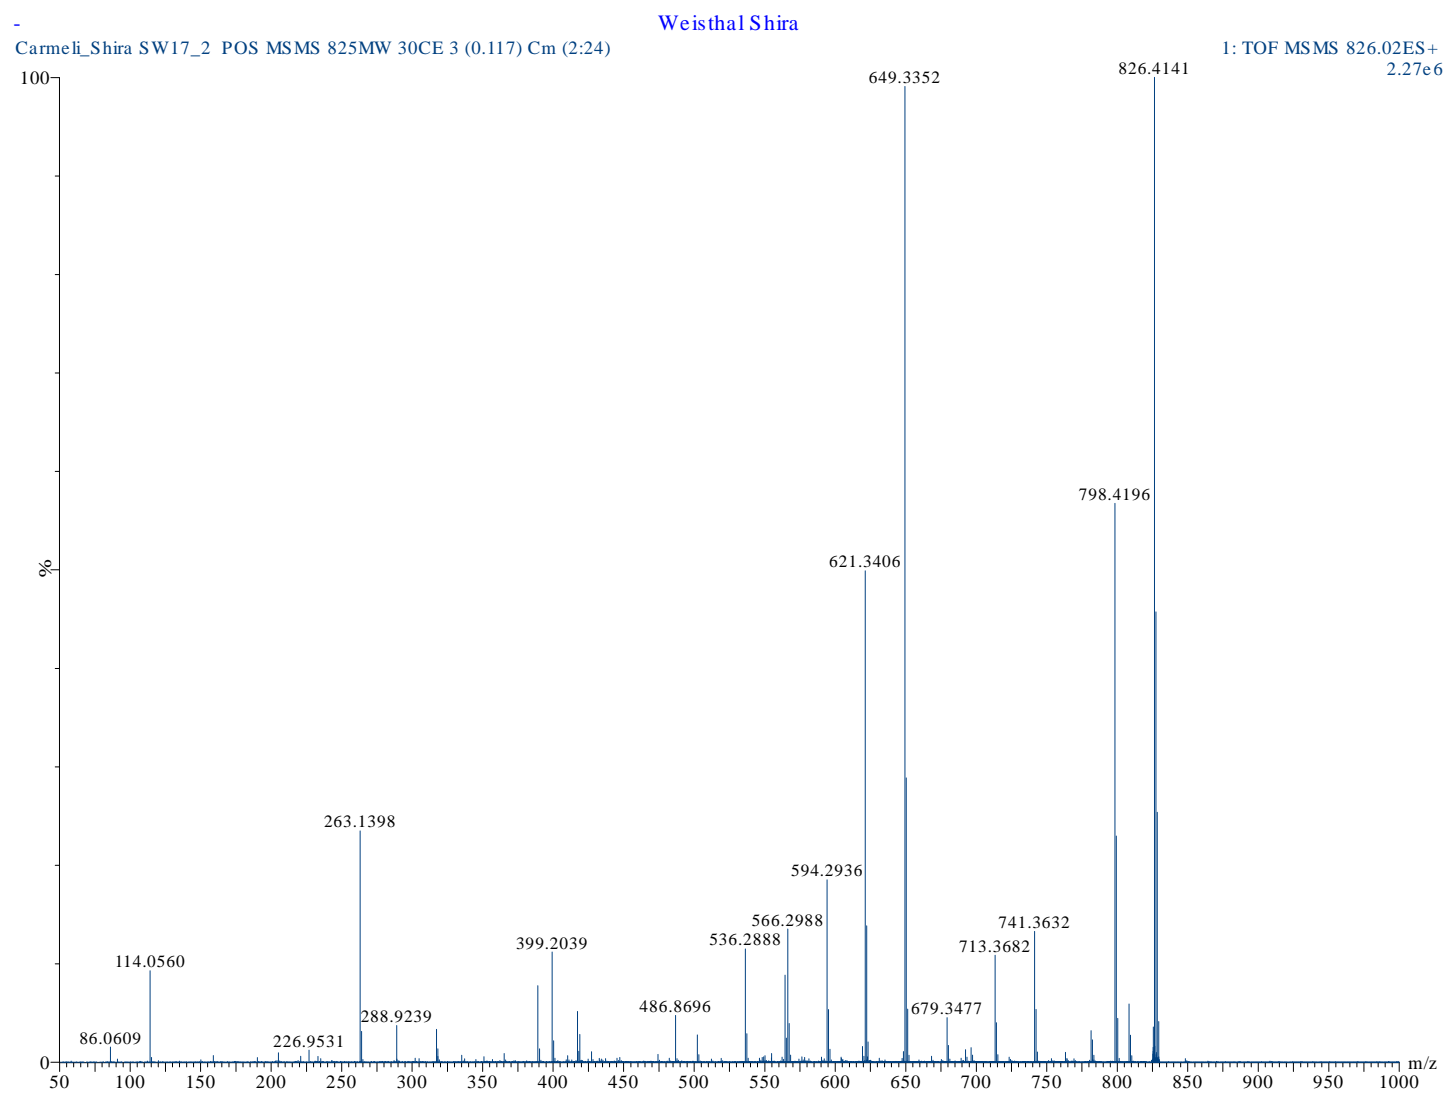

Figure S10. Scheme of Fragmentations in the Positive HR ESI MS/MS Spectrum of Hydanto-anabaenopeptin A (1)

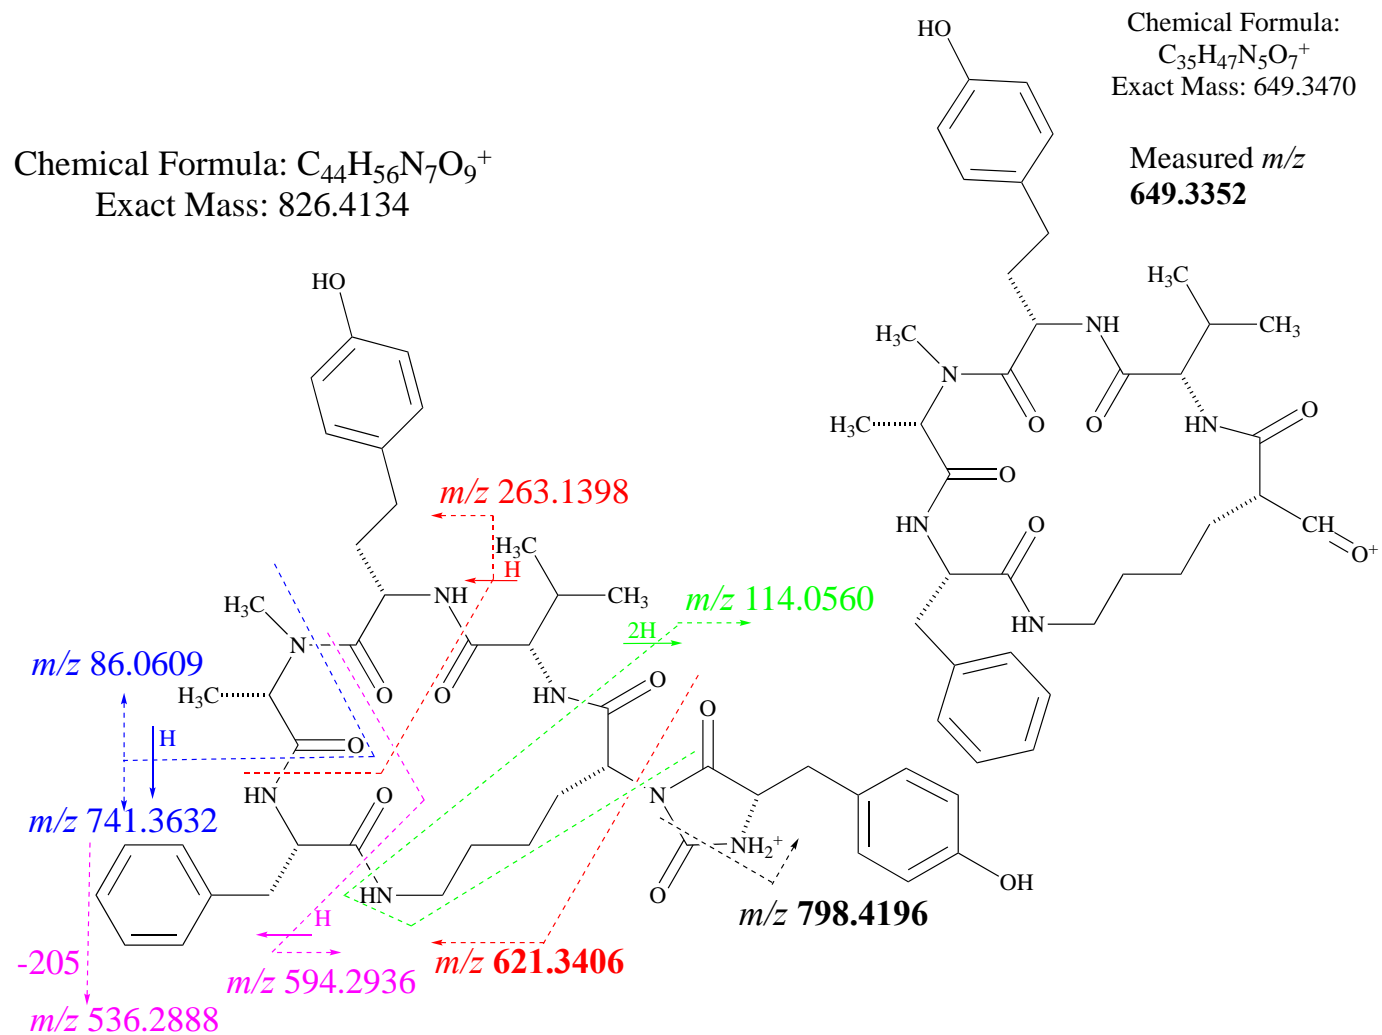

Figure S11. LCMS Traces of Marfey's Method Amino Acids Analysis of Hydanto-anabaenopeptin A (1)

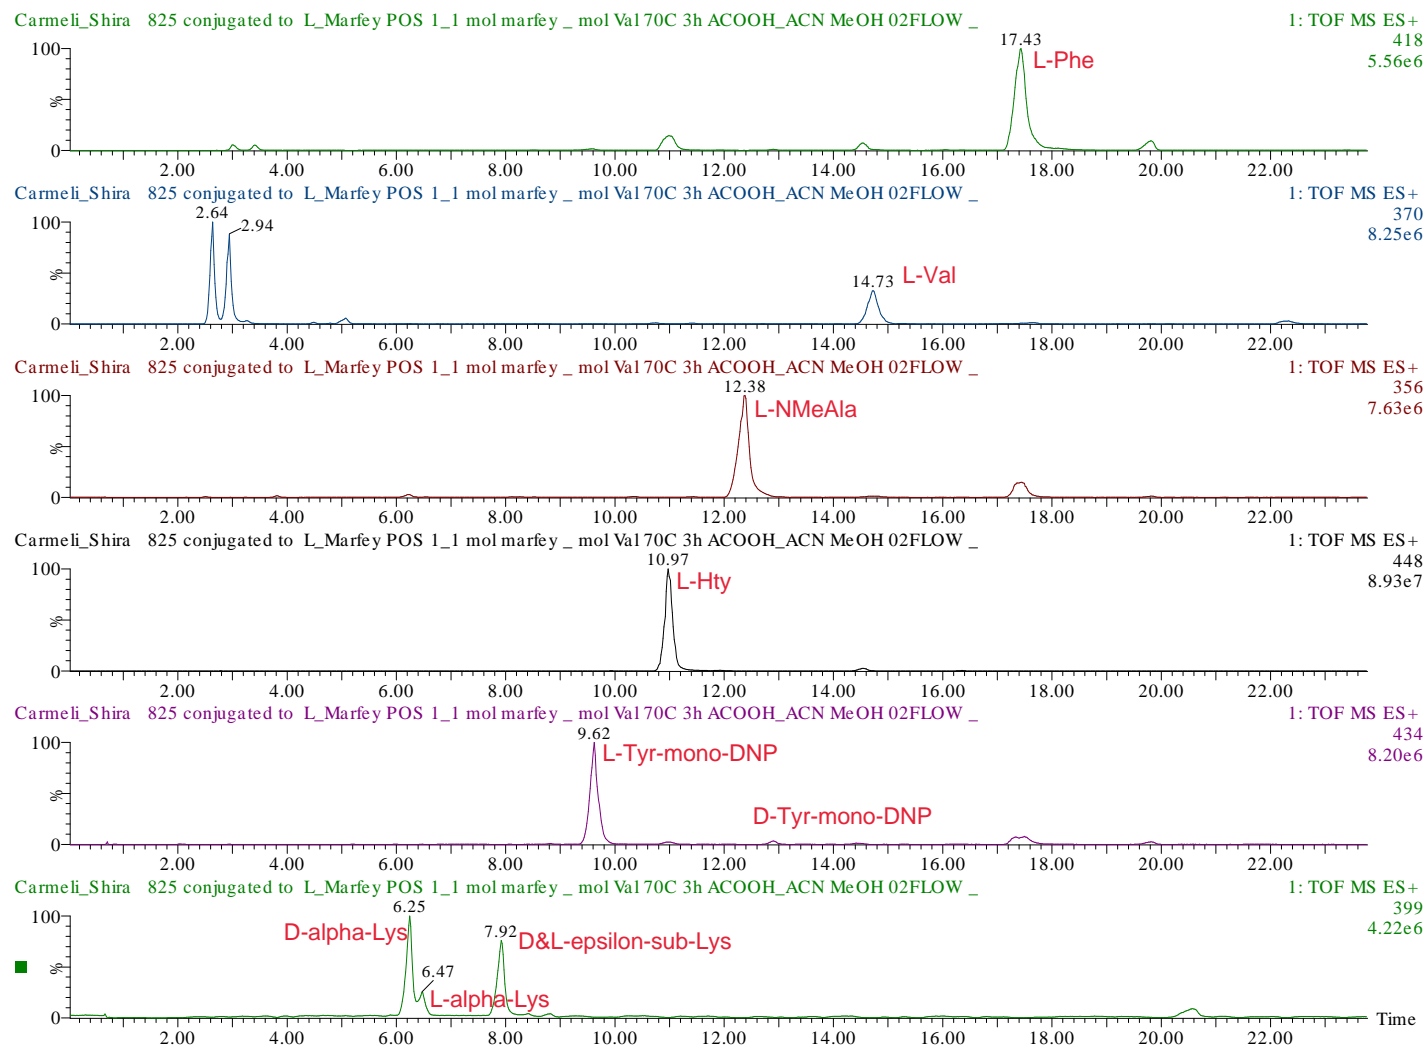

Table S1. NMR Data of Hydanto-anabaenopeptin A (**1**) in DMSO-*d*<sub>6</sub><sup>a</sup>

| Position | $\delta_C$ , Mult.    | $\delta_H$ , Mult. ( <i>J</i> in Hz) <sup>b</sup> | HMBC correlations <sup>c</sup>             | COSY correlations                | TOCSY correlations             | ROESY correlations           |
|----------|-----------------------|---------------------------------------------------|--------------------------------------------|----------------------------------|--------------------------------|------------------------------|
| Tyr-1    | 174.1, C              |                                                   | Tyr-2, 3b, 2-NH, Lys-2                     |                                  |                                |                              |
| Tyr-2    | 57.0, CH              | 4.34, t (4.3)<br>4.40, t (4.4)                    | Tyr-3b                                     | Tyr-2-NH, 3a, 3b<br>Tyr-2-NH, 3b |                                | Tyr-2-NH, 3b<br>Tyr-2-NH, 3b |
| Tyr-2    | 57.5, CH              |                                                   |                                            |                                  |                                |                              |
| Tyr-2-NH |                       | 8.55, s                                           |                                            |                                  | Tyr-2, 3a, 3b<br>Tyr-2, 3a, 3b | Tyr-2                        |
| Tyr-2-NH |                       | 8.49, s                                           |                                            |                                  |                                |                              |
| Tyr-3a   | 35.5, CH <sub>2</sub> | 2.89, dd (14.0,4.0)<br>2.82, m                    | Tyr-5,5'                                   | Tyr-2, 3b<br>Tyr-2, 3a           |                                | Tyr-2, 5,5'                  |
| Tyr-3b   | 35.8, CH <sub>2</sub> | 2.83, m                                           |                                            |                                  |                                |                              |
| Tyr-3a   |                       | 2.83, m                                           |                                            | Tyr-2<br>Tyr-2                   |                                | Tyr-2                        |
| Tyr-3b   |                       |                                                   |                                            |                                  |                                |                              |
| Tyr-4    | 124.3, C              |                                                   | Tyr-2, 3a, 3b, 6,6'<br>Tyr-2, 3a, 3b, 6,6' |                                  |                                |                              |
| Tyr-4    | 124.5, C              |                                                   |                                            |                                  |                                |                              |
| Tyr-5,5' | 130.9, CH             | 6.88, d (8.4)                                     | Tyr-3a, 3b, 5',5, 6,6'                     | Tyr-6,6'                         |                                | Tyr-2-NH, 3a, 3b, 6,6'       |
| Tyr-5,5' | 130.9, CH             | 6.90, d (8.4)                                     | Tyr-3a, 3b, 5',5, 6,6'                     | Tyr-6,6'                         |                                |                              |
| Tyr-6,6' | 115.0, CH             | 6.61, d (8.4)<br>6.62, d (8.4)                    | Tyr-6',6                                   | Tyr-5,5'<br>Tyr-5,5'             |                                | Tyr-5,5'                     |
| Tyr-6,6' |                       |                                                   |                                            |                                  |                                |                              |
| Tyr-7    | 156.7, C              |                                                   | Tyr-5,5', 6,6'<br>Tyr-5,5', 6,6'           |                                  |                                |                              |
| Tyr-7    | 156.8, C              |                                                   |                                            |                                  |                                |                              |
| CO       | 156.4, C              |                                                   | Tyr-2, 2-NH, Lys-2<br>Tyr-2, 2-NH, Lys-2   |                                  |                                |                              |
| CO       | 156.6, C              |                                                   |                                            |                                  |                                |                              |
| Lys-1    | 167.9, C              |                                                   | Val-2-NH, Lys-2<br>Val-2-NH, Lys-2         |                                  |                                |                              |
| Lys-1    | 168.0, C              |                                                   |                                            |                                  |                                |                              |
| Lys-2    | 56.3, CH              | 4.08, dd (12.0,5.0)                               |                                            | Lys-3a<br>Lys-3a                 | Lys-3a<br>Lys-3a               |                              |
| Lys-2    | 56.6, CH              | 4.09, dd (11.3,5.0)                               |                                            |                                  |                                |                              |

|                                                    |                                                          |                                                                      |                                           |                                                                            |                                               |                                    |
|----------------------------------------------------|----------------------------------------------------------|----------------------------------------------------------------------|-------------------------------------------|----------------------------------------------------------------------------|-----------------------------------------------|------------------------------------|
| Lys-3a<br>Lys-3b<br><i>Lys-3a</i><br><i>Lys-3b</i> | 29.3, CH <sub>2</sub>                                    | 2.12, brdq (12.5,3.5)<br>0.84, m<br><i>1.94, m</i><br><i>0.74, m</i> | Lys-2                                     | Lys-2, 4b<br><br><i>Lys-2,</i>                                             |                                               |                                    |
| Lys-4a<br>Lys-4b                                   | 22.9, CH <sub>2</sub>                                    | 1.48, m<br>1.37, m                                                   |                                           | Lys-3a                                                                     |                                               |                                    |
| Lys-5a<br>Lys-5b                                   | 28.6, CH <sub>2</sub>                                    | 1.37, m<br>1.30, m                                                   |                                           | Lys-5b<br>Lys-5a                                                           |                                               |                                    |
| Lys-6a<br>Lys-6b<br><i>Lys-6a</i><br><i>Lys-6b</i> | 38.4, CH <sub>2</sub><br><br><i>38.2, CH<sub>2</sub></i> | 3.54, m<br>2.63, m<br><i>3.46, m</i><br><i>2.64, m</i>               |                                           | Lys-6b, 6-NH<br>Lys-6a, 6-NH<br><i>Lys-6b, 6-NH</i><br><i>Lys-6a, 6-NH</i> |                                               | Lys-6b<br>Lys-6a                   |
| Lys-6-NH                                           |                                                          | 7.41, dd (7.2, 4.5)                                                  |                                           |                                                                            | Lys-6a, 6b                                    | Phe-2-NH                           |
| Val-1<br><i>Val-1</i>                              | 172.4, C<br><i>172.3, C</i>                              |                                                                      | Val-2, Hty-2-NH<br><i>Val-2, Hty-2-NH</i> |                                                                            |                                               |                                    |
| Val-2<br><i>Val-2</i>                              | 57.9, CH<br><i>58.0, CH</i>                              | 3.98, t (7.8)<br><i>4.02, t (7.4)</i>                                | Val-4, 5<br><i>Val-4, 5</i>               | Val-2-NH, 3<br><i>Val-2-NH, 3</i>                                          | Val-2-NH, 3, 4, 5<br><i>Val-2-NH, 3, 4, 5</i> | Val-2-NH<br><i>Val-2-NH</i>        |
| Val-2-NH<br><i>Val-2-NH</i>                        |                                                          | 7.76, d (7.2)<br><i>7.92, d (7.2)</i>                                |                                           | Val-2<br><i>Val-2</i>                                                      | Val-2, 3, 4, 5<br><i>Val-2, 3</i>             | Val-2, 5<br><i>Val-2-NH, Val-5</i> |
| Val-3<br><i>Val-3</i>                              | 30.4, CH                                                 | 1.96, m<br><i>1.98, m</i>                                            | Val-2, 4, 5<br><i>Val-2, 4, 5</i>         | Val-2, 4, 5<br><i>Val-2, 4, 5</i>                                          |                                               | Val-2                              |
| Val-4<br><i>Val-4</i>                              | 19.1, CH <sub>3</sub>                                    | 0.96, d (6.9)<br><i>1.00, d (6.7)</i>                                | Val-2, 3, 5<br><i>Val-2, 3, 5</i>         | Val-3<br><i>Val-3</i>                                                      |                                               | Val-2                              |
| Val-5<br><i>Val-5</i>                              | 18.9, CH <sub>3</sub>                                    | 0.88, d (6.7)<br><i>0.94, d (7.0)</i>                                | Val-2, 3, 4<br><i>Val-2, 3, 4</i>         | Val-3<br><i>Val-3</i>                                                      |                                               | Val-2<br><i>Phe-5,5'</i>           |
| Hty-1<br><i>Hty-1</i>                              | 171.2, C<br><i>171.0, C</i>                              |                                                                      | NMe-Ala-2, 3, Hty-2, 3a, NMe-Ala-2, 3     |                                                                            |                                               |                                    |
| Hty-2<br><br><i>Hty-2</i>                          | 48.9, CH<br><br><i>49.0, CH</i>                          | 4.74, m<br><br><i>4.73, m</i>                                        |                                           | Hty-2-NH, 3a, 3b                                                           | Hty-2-NH, 3a, 3b, 4a, 4b                      |                                    |

|                                          |                          |                                           |                                                                |                                                    |                                                    |                                       |
|------------------------------------------|--------------------------|-------------------------------------------|----------------------------------------------------------------|----------------------------------------------------|----------------------------------------------------|---------------------------------------|
|                                          |                          |                                           |                                                                | <i>Hty-2-NH, 3a, 3b</i>                            |                                                    |                                       |
| <i>Hty-2-NH</i><br><i>Hty-2-NH</i>       |                          | 8.97, d (4.9)<br>8.95, <i>d</i> (4.9)     |                                                                |                                                    | <i>Hty-2</i>                                       |                                       |
| <i>Hty-3a</i><br><i>Hty-3b</i>           | 33.5, CH <sub>2</sub>    | 1.85, m<br>1.73, m                        |                                                                | <i>Hty-3b, 4a, 4b</i><br><i>Hty-3a, 4a, 4b</i>     |                                                    |                                       |
| <i>Hty-4a</i><br><i>Hty-4b</i>           | 30.7, CH <sub>2</sub>    | 2.60, m<br>2.40, m                        | <i>Hty-6,6'</i>                                                | <i>Hty-3a, 3b, 4b</i><br><i>Hty-3a, 3b, 4a</i>     |                                                    |                                       |
| <i>Hty-5</i>                             | 131.0, C                 |                                           | <i>Hty-4b, 7,7'</i>                                            |                                                    |                                                    |                                       |
| <i>Hty-6,6'</i><br><i>Hty-6,6'</i>       | 129.2, CH                | 6.98, d (8.5)<br>6.97, <i>d</i> (8.6)     | <i>Hty-4a, 4b, 6',6</i>                                        | <i>Hty-7,7'</i><br><i>Hty-7,7'</i>                 |                                                    | <i>Hty-7,7'</i>                       |
| <i>Hty-7,7'</i>                          | 115.3, CH                | 6.66, d (8.5)                             | <i>Hty-7',7</i>                                                | <i>Hty-6,6' Hty-7,7'</i>                           |                                                    | <i>Hty-6,6'</i>                       |
| <i>Hty-8</i>                             | 155.9, C                 |                                           | <i>Hty-6,6', 7,7'</i>                                          |                                                    |                                                    |                                       |
| <i>NMe-Ala-1</i><br><br><i>NMe-Ala-1</i> | 170.0, C<br><br>169.6, C |                                           | <i>Phe-2-NH, NMe-Ala-2, 3</i><br><i>Phe-2-NH, NMe-Ala-2, 3</i> |                                                    |                                                    |                                       |
| <i>NMe-Ala-2</i><br><i>NMe-Ala-2</i>     | 54.5, CH<br>54.6, CH     | 4.85, q (7.3)<br>4.86, <i>m</i>           | <i>NMe-Ala-3, NMe</i>                                          | <i>NMe-Ala-3,</i>                                  |                                                    | <i>NMe-Ala-3, NMe</i>                 |
| <i>NMe-Ala-3</i>                         | 14.1, CH <sub>3</sub>    | 1.05, d (6.7)                             | <i>NMe-Ala-2</i>                                               | <i>NMe-Ala-2</i>                                   |                                                    | <i>NMe-Ala-2, NMe</i>                 |
| <i>NMe-Ala-Me</i>                        | 27.2, CH <sub>3</sub>    | 1.78, s                                   | <i>NMe-Ala-2</i>                                               |                                                    |                                                    | <i>Phe-2, 2-NH, NMe-Ala-2, 3</i>      |
| <i>Phe-1</i>                             | 170.9, C                 |                                           | <i>Lys-6-NH</i>                                                |                                                    |                                                    |                                       |
| <i>Phe-2</i><br><br><i>Phe-2</i>         | 55.1, CH<br><br>54.9, CH | 4.34, m<br><br>4.33, <i>m</i>             | <i>Phe-2-NH</i>                                                | <i>Phe-3a, 3b, NH</i><br><br><i>Phe-3a, 3b, NH</i> | <i>Phe-3a, 3b, NH</i><br><br><i>Phe-3a, 3b, NH</i> | <i>Phe-2-NH, 3a, 5,5' NMe-Ala-Me</i>  |
| <i>Phe-2-NH</i><br><br><i>Phe-2-NH</i>   |                          | 8.69, d (8.9)<br><br>8.66, <i>d</i> (8.6) |                                                                | 4.34<br><br><i>Phe-2</i>                           | <i>Phe-2, 3a, 3b</i><br><br><i>Phe-2</i>           | <i>Lys-6-NH, Phe-3b, NMe-Ala-Me</i>   |
| <i>Phe-3a</i><br><i>Phe-3b</i>           | 37.7, CH <sub>2</sub>    | 3.23, dd (13.8, 3.0)<br>2.81, m           | <i>Phe-5,5'</i>                                                | <i>Phe-2, 3b</i><br><i>Phe-2, 3a</i>               |                                                    | <i>Phe-2</i><br><i>Phe-2-NH, 5,5'</i> |

|                                |                       |                                       |                  |                              |  |                           |
|--------------------------------|-----------------------|---------------------------------------|------------------|------------------------------|--|---------------------------|
| <i>Phe-3a</i><br><i>Phe-3b</i> | 37.6, CH <sub>2</sub> | 3.20, <i>m</i><br>2.76, <i>m</i>      |                  | <i>Phe-2</i><br><i>Phe-2</i> |  |                           |
| Phe-4                          | 138.5, C              |                                       | Phe-3b, 6,6'     |                              |  |                           |
| Phe-5,5'<br><i>Phe-5,5'</i>    | 129.1, CH<br>x2       | 7.06, d (7.2)<br>7.05, <i>d</i> (7.2) | Phe-3a, 3b, 5',5 |                              |  | Phe-2, 3b<br><i>Val-5</i> |
| Phe-6,6'                       | 128.5, CH<br>x2       | 7.19, t (7.2)                         | Phe-6',6         |                              |  |                           |
| Phe-7                          | 126.3, CH             | 7.14, t (7.2)                         | Phe-5,5'         |                              |  |                           |

<sup>a</sup>500 MHz for <sup>1</sup>H and 125 MHz for <sup>13</sup>C, ca. 2:1 major rotamer, *minor rotamer*. <sup>b</sup>From HSQC correlations. <sup>c</sup>*J*<sub>C-H</sub>=8 Hz.



Figure S12. LCMS Chromatogram and Mass spectrum of Hydanto-anabaenopeptin A (1)

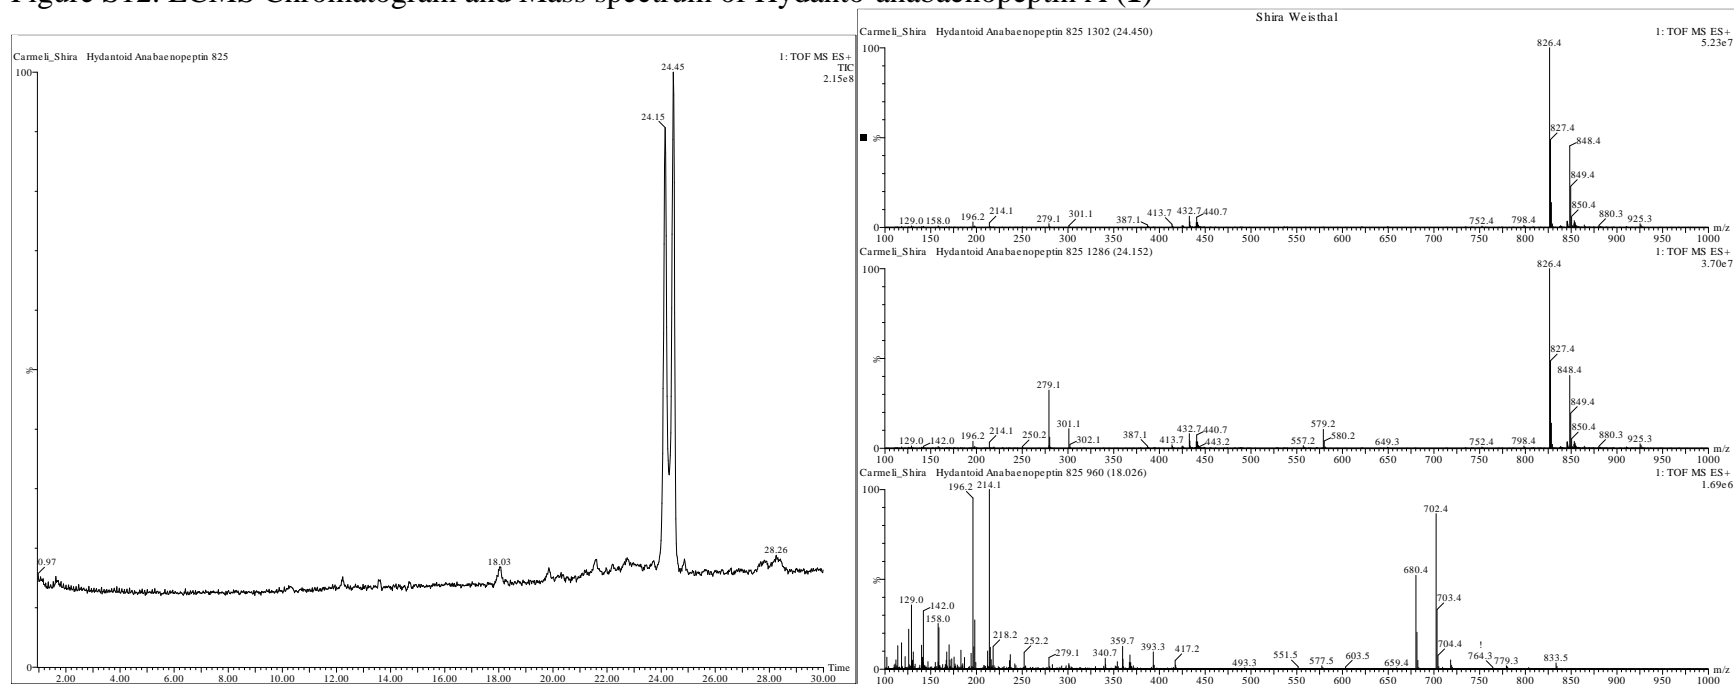

Figure S13.  $^1\text{H}$  NMR Spectrum of Hydato-anabaenopeptin B (**2**) in  $\text{DMSO}-d_6$

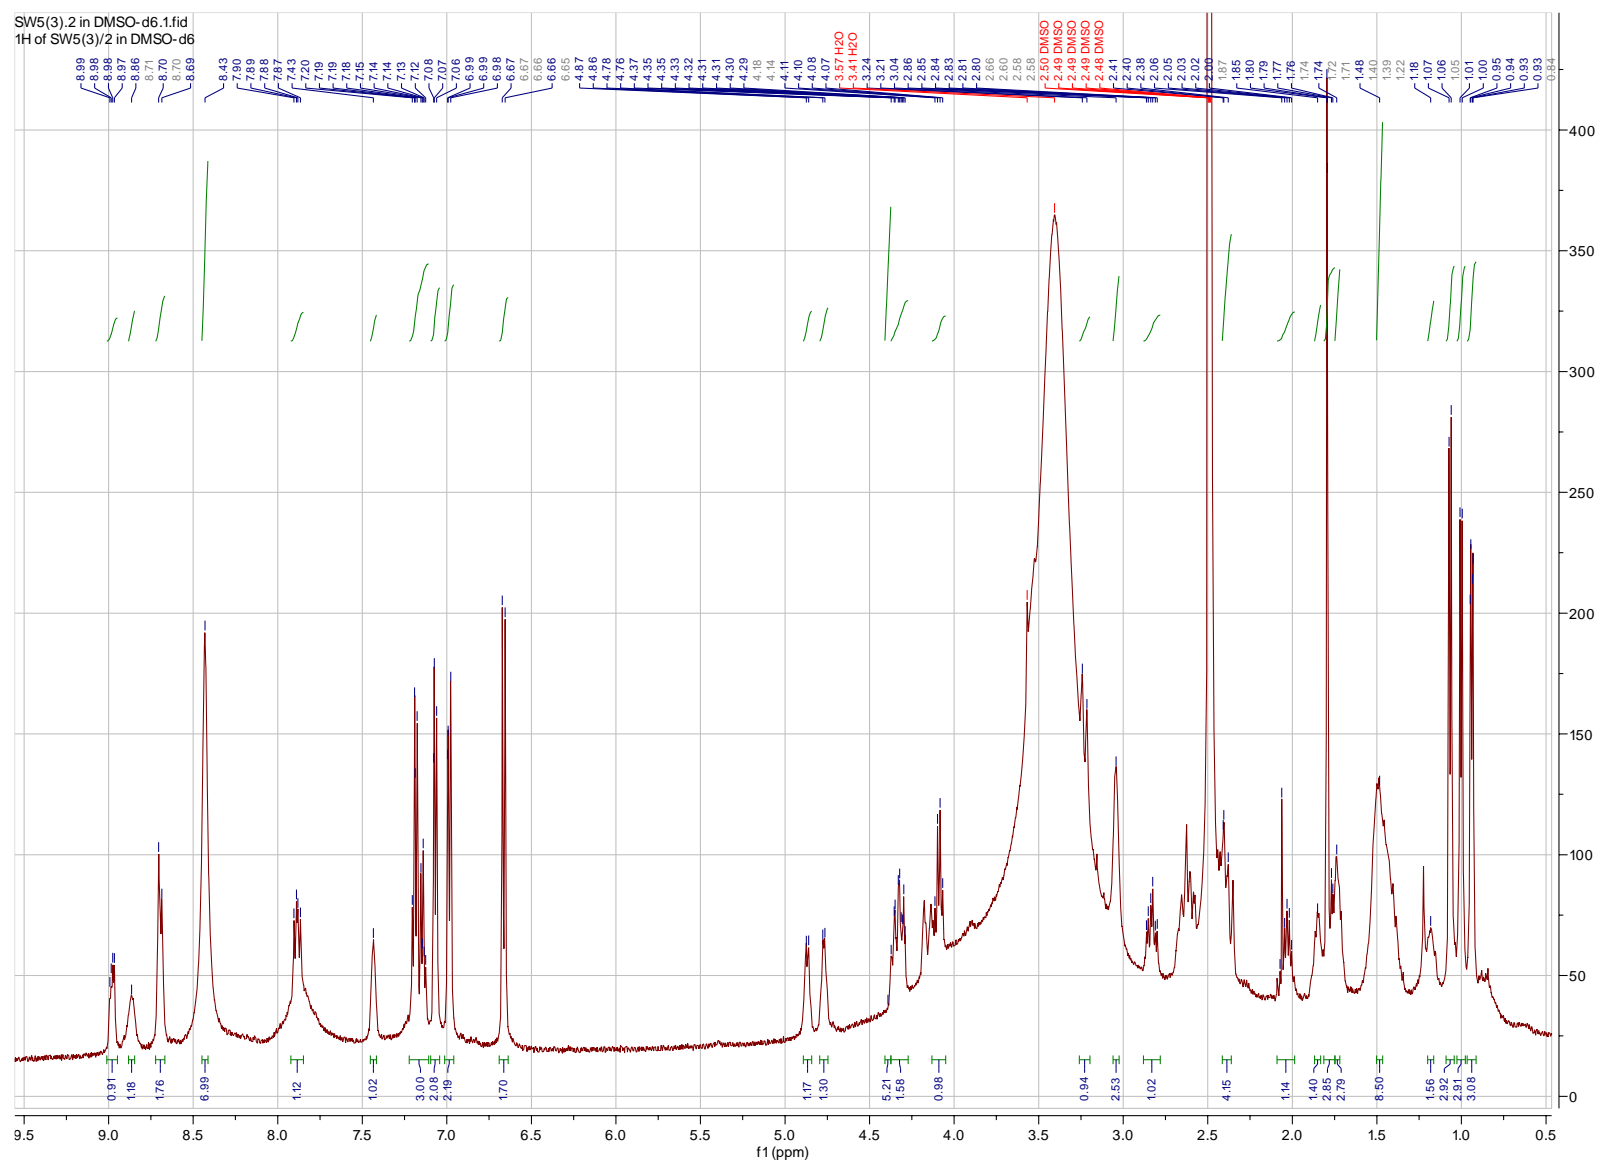

Figure S14.  $^{13}\text{C}$  NMR Spectrum of Hydanto-anabaenopeptin B (**2**) in  $\text{DMSO-}d_6$

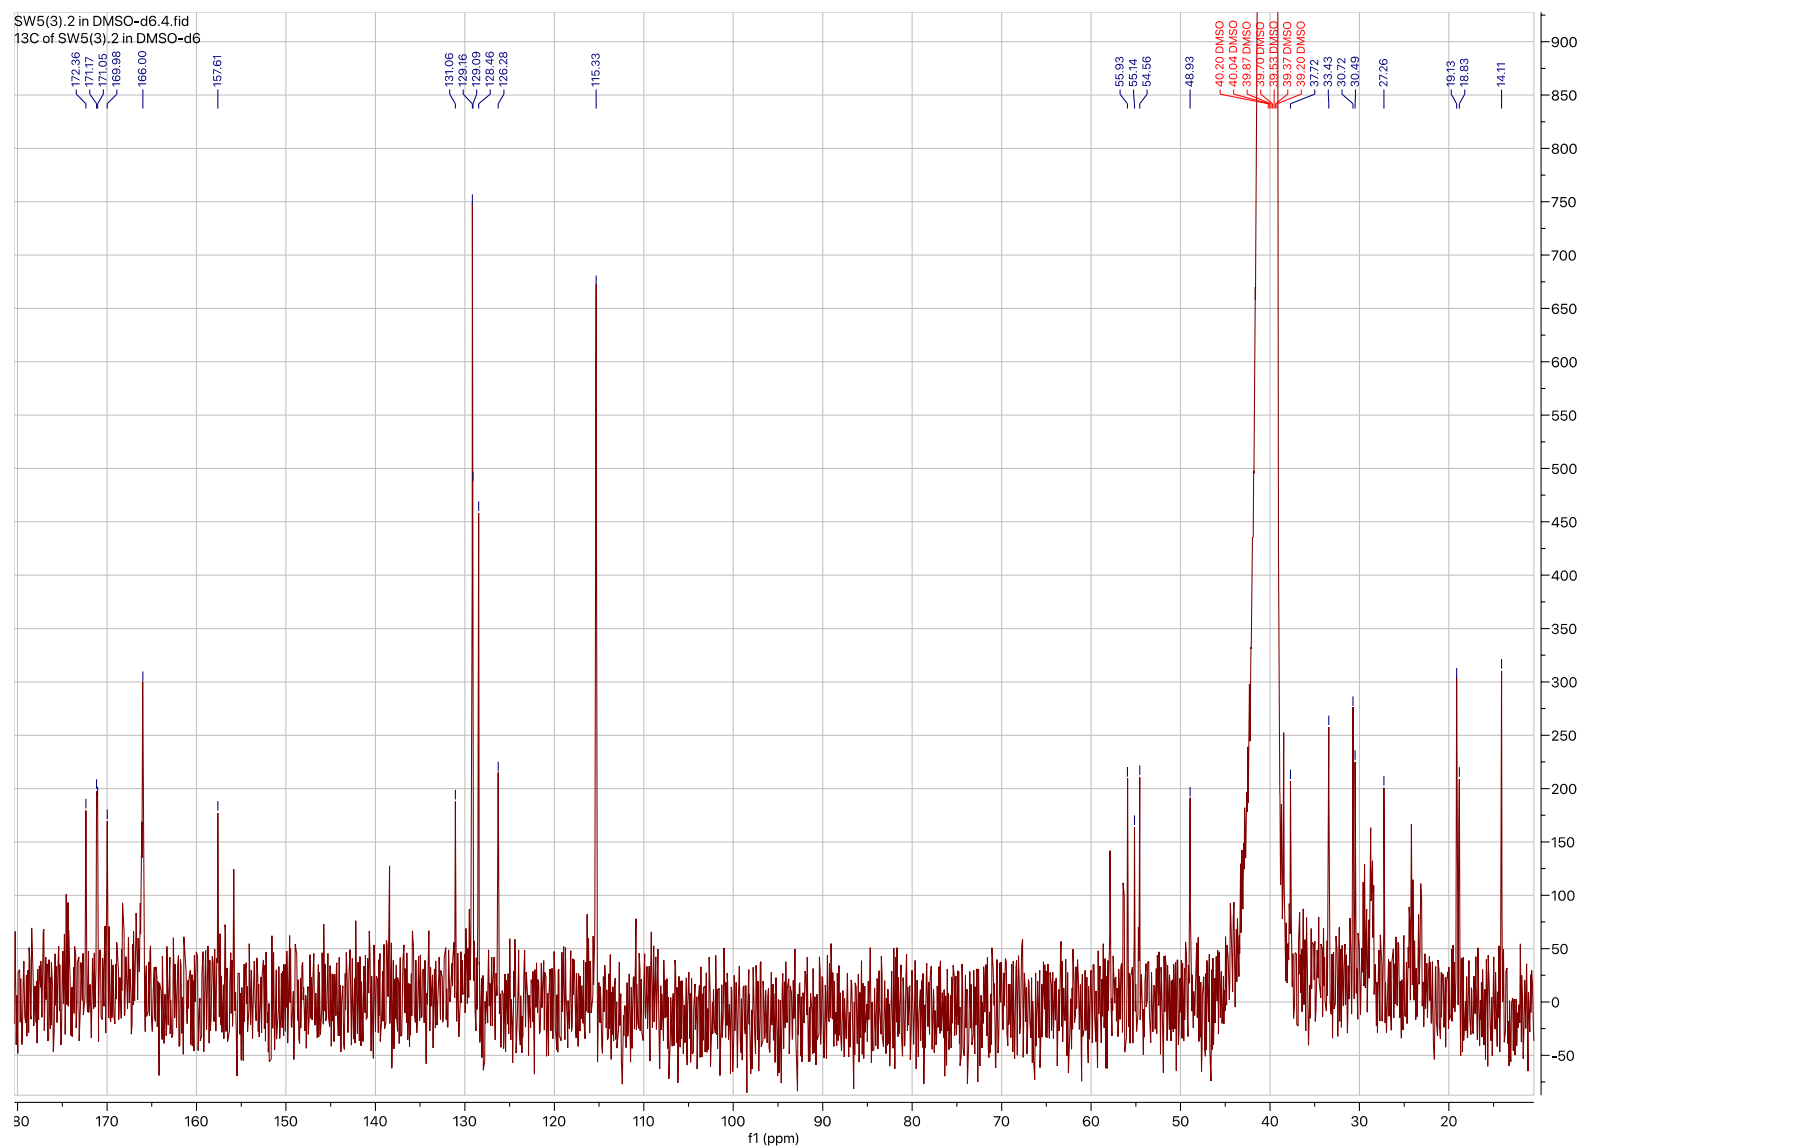

Figure S15. HSQC Spectrum of Hydanto-anabaenopeptin B (**2**) in DMSO-*d*<sub>6</sub>

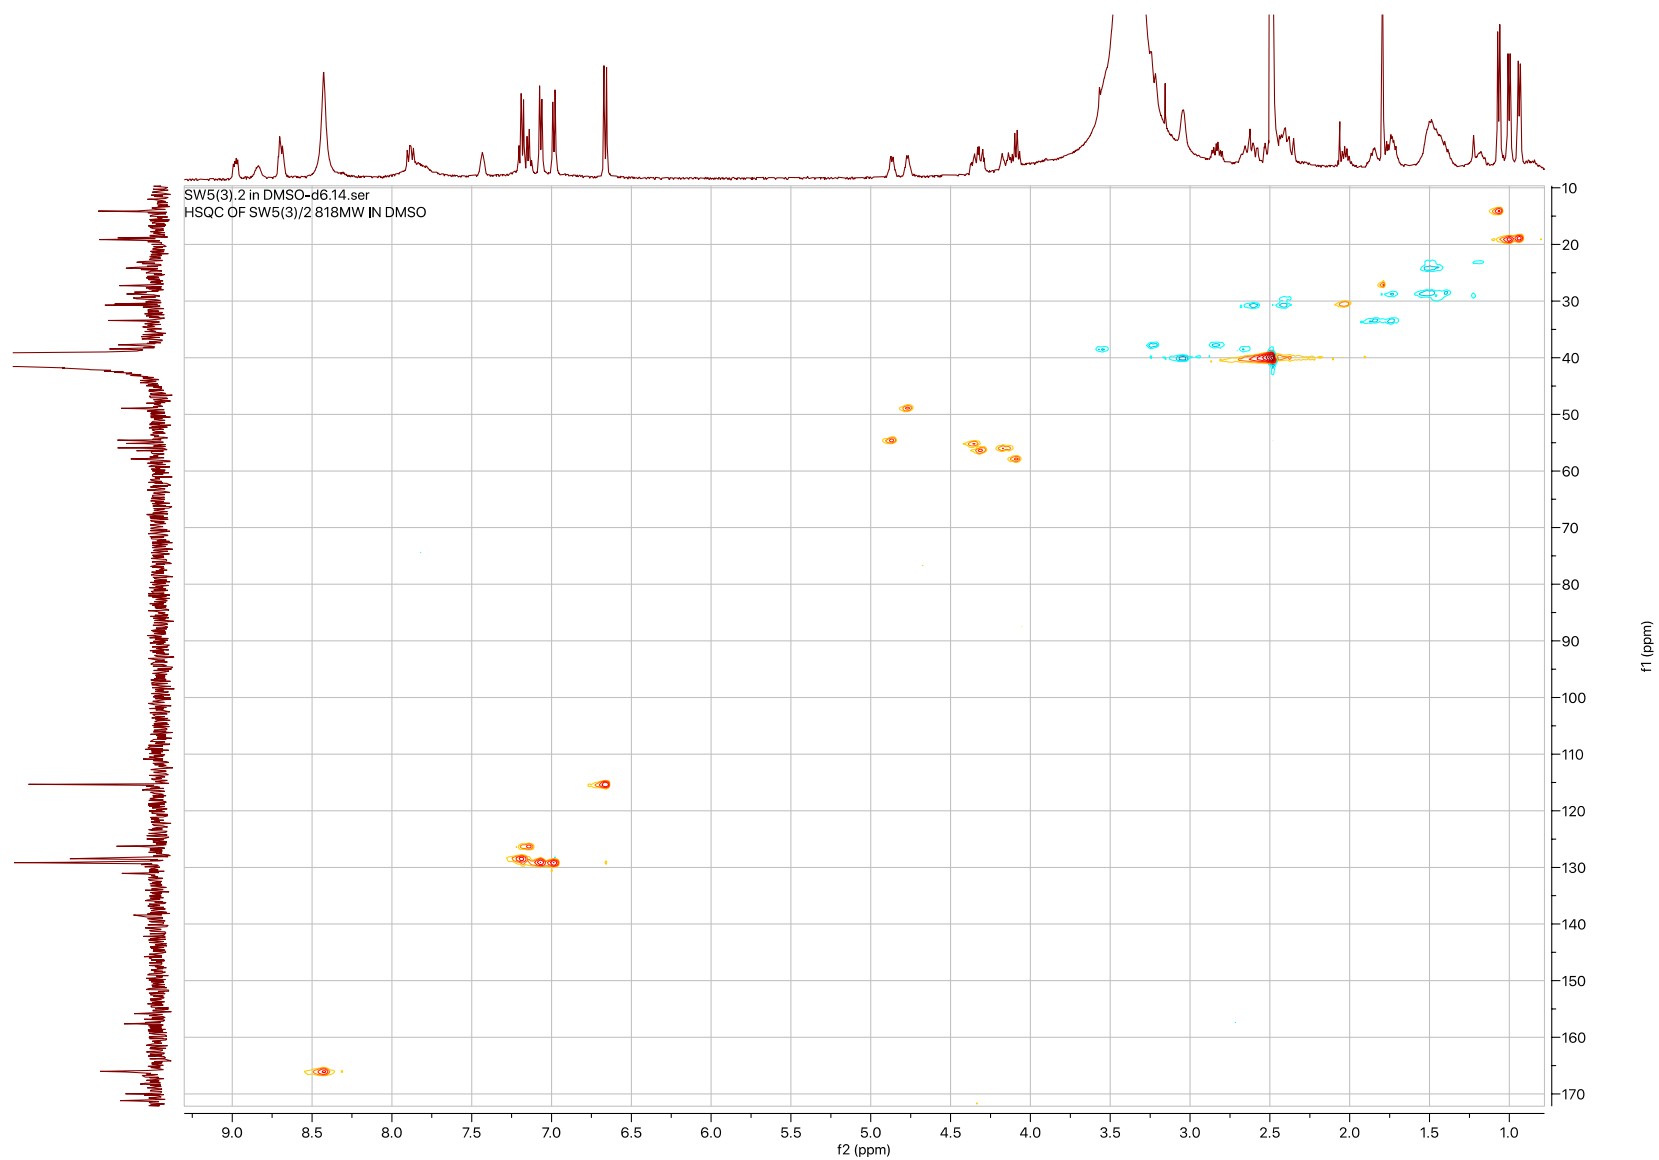

Figure S16. HMBC Spectrum of Hydanto-anabaenopeptin B (**2**) in DMSO-*d*<sub>6</sub>

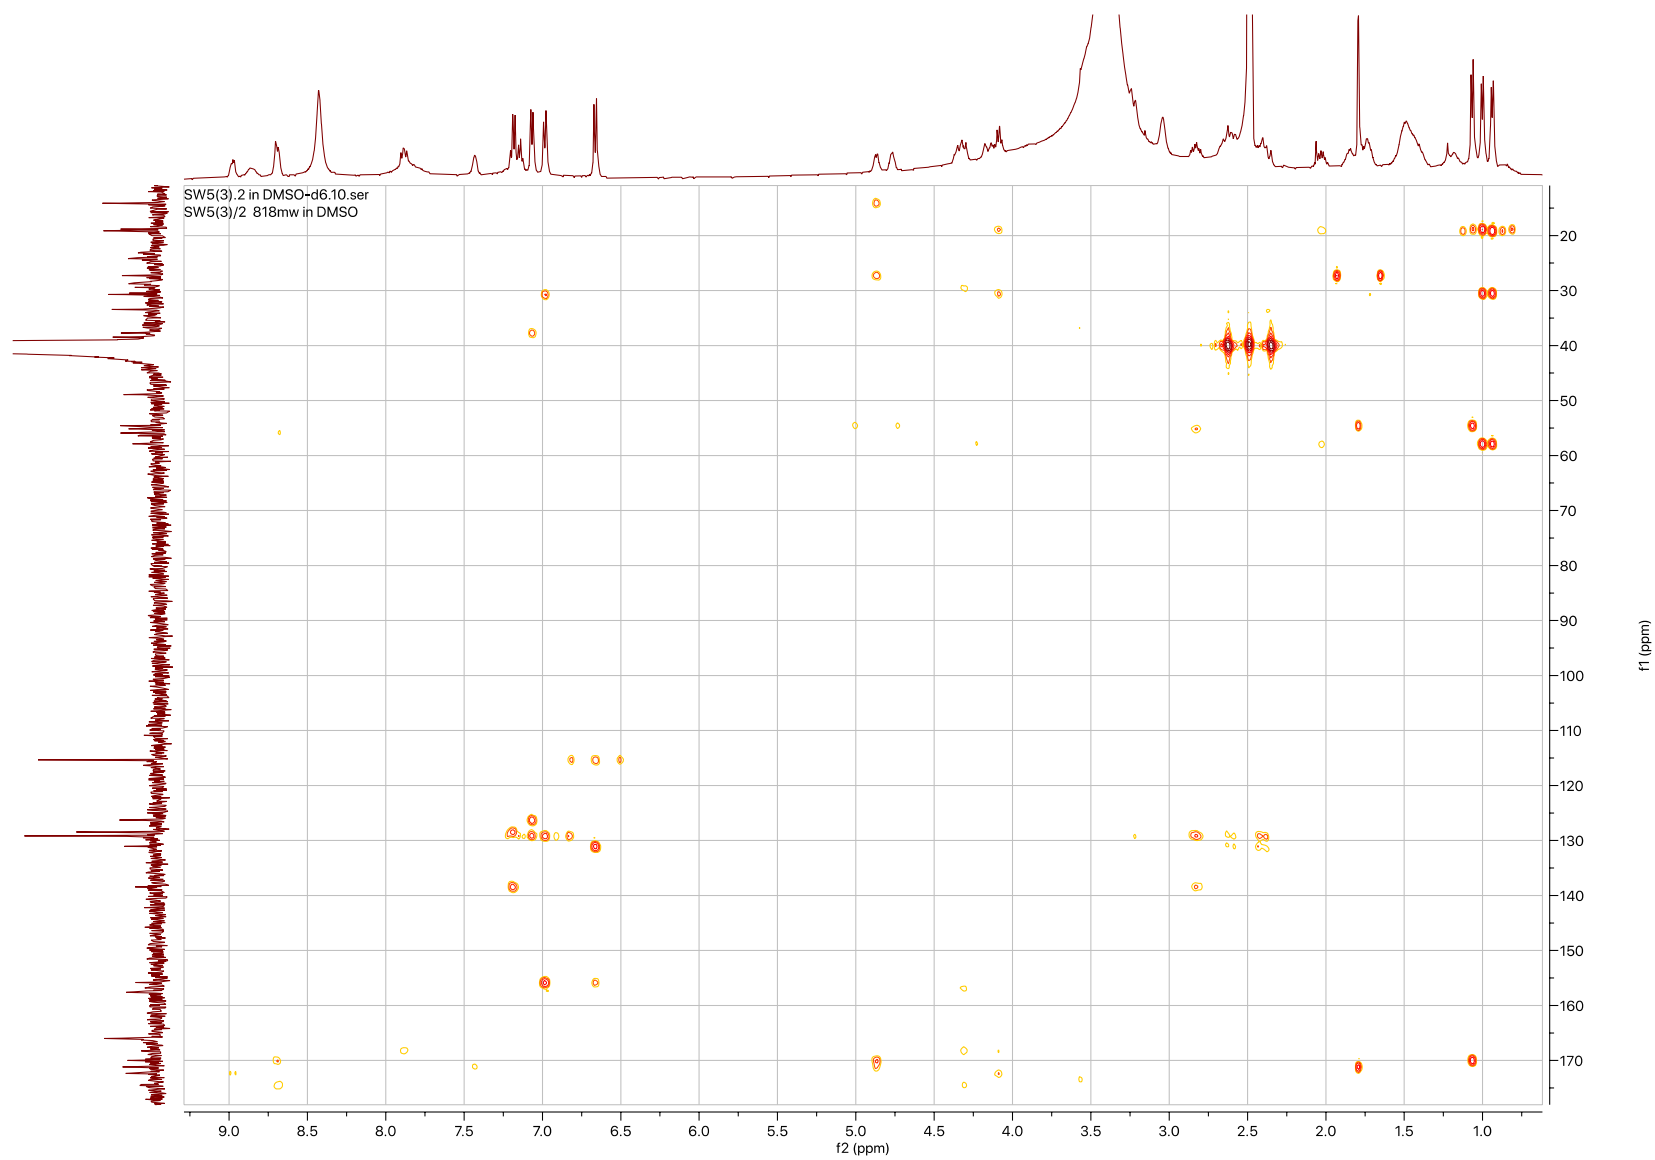

Figure S17. COSY Spectrum of Hydanto-anabaenopeptin B (**2**) in DMSO-*d*<sub>6</sub>

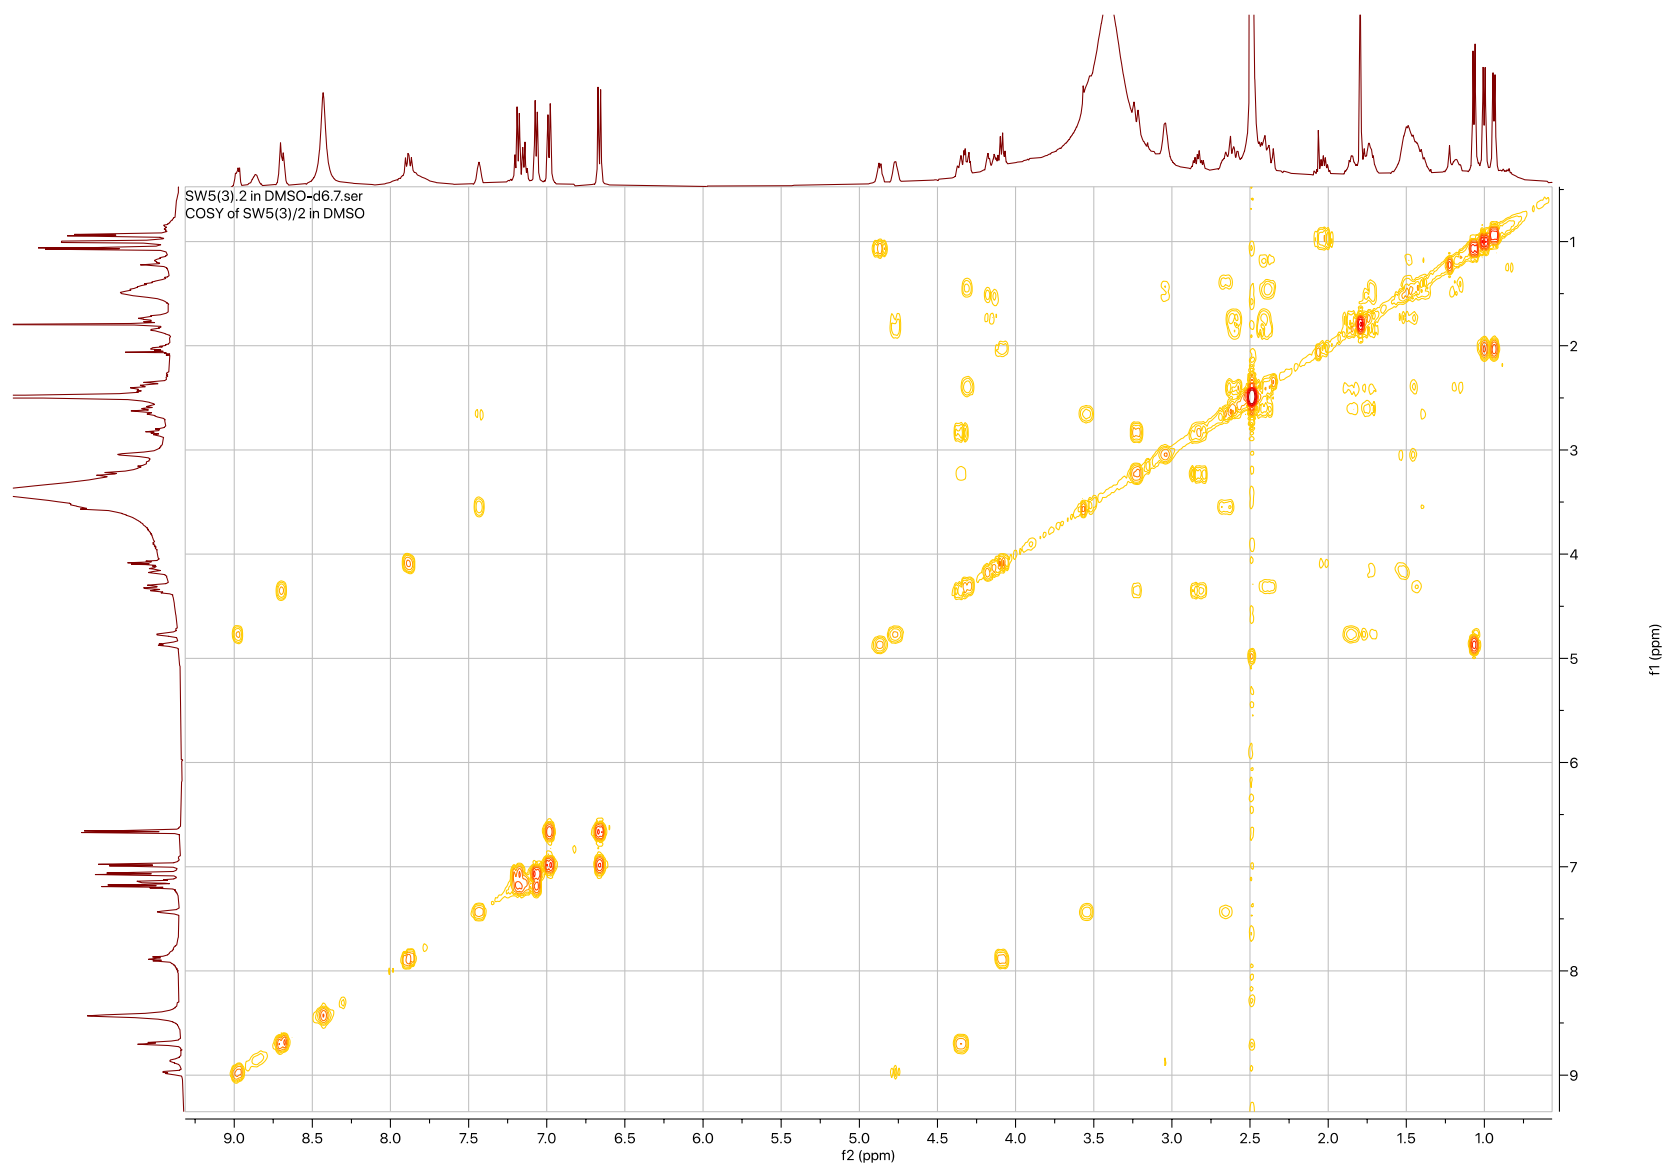

Figure S18. TOCSY Spectrum of Hydanto-anabaenopeptin B (**2**) in DMSO-*d*<sub>6</sub>

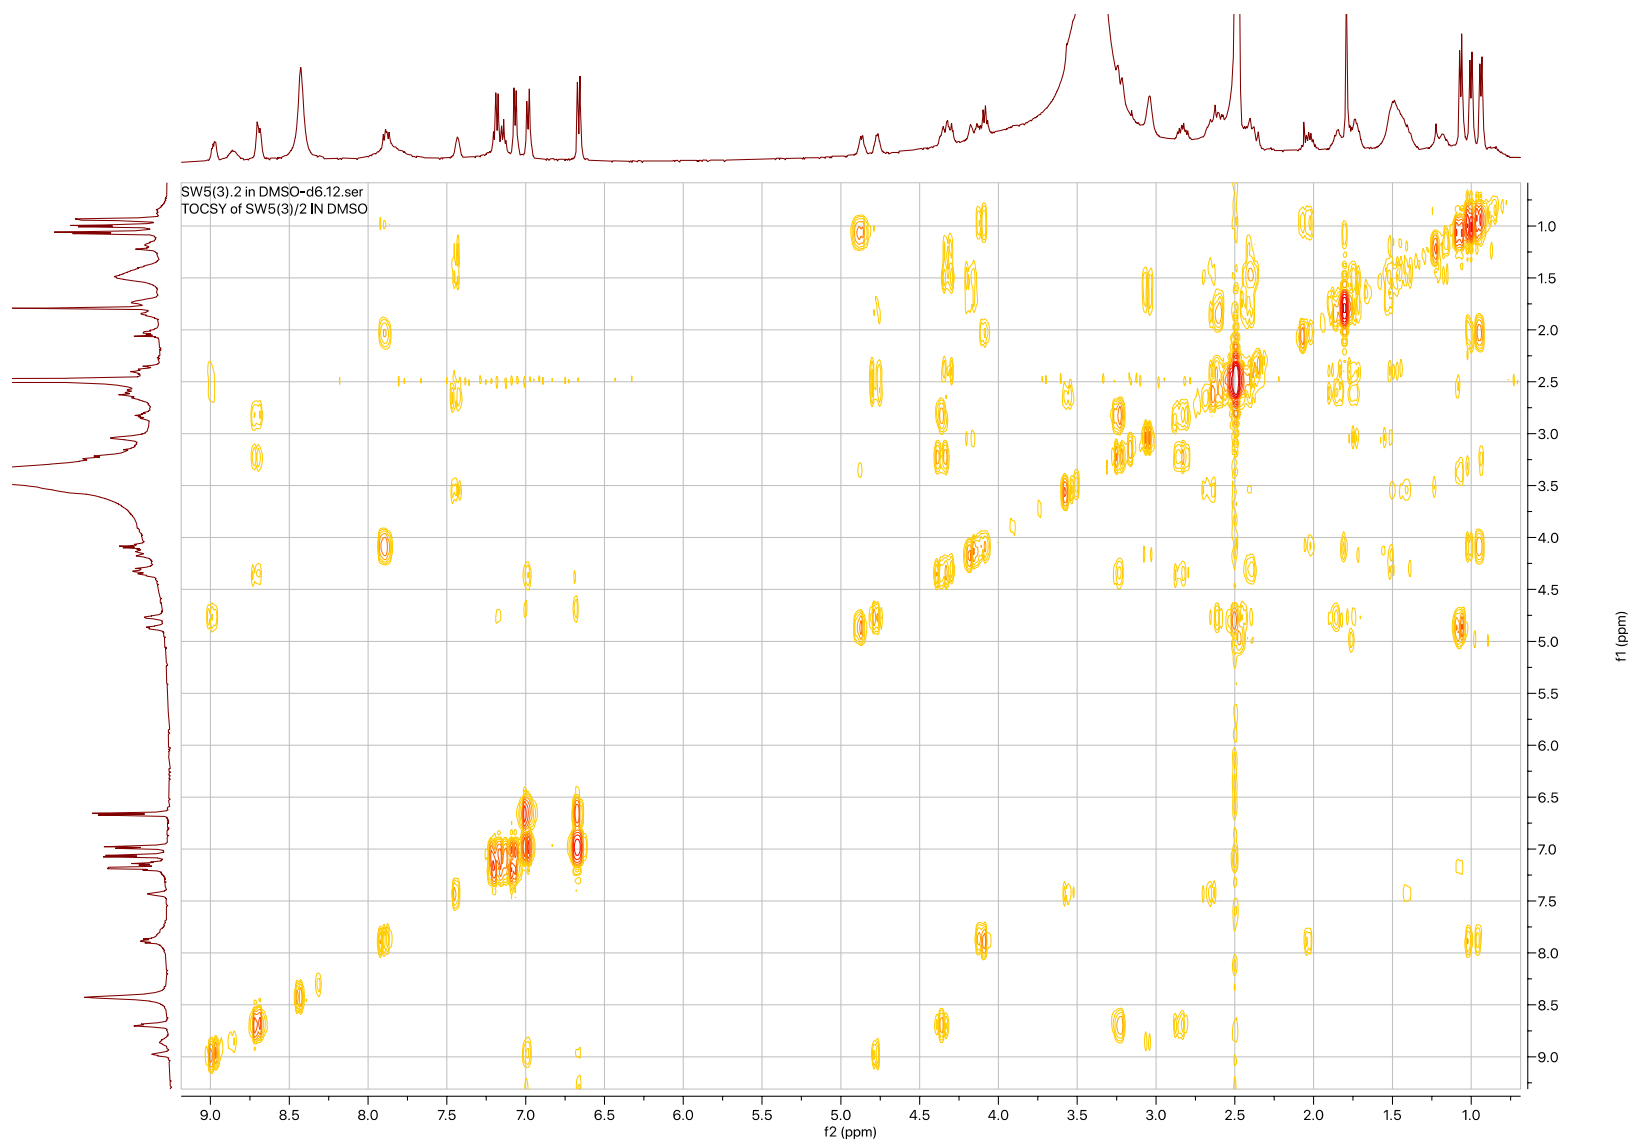

Figure S19. ROESY Spectrum of Hydanto-anabaenopeptin B (**2**) in DMSO-*d*<sub>6</sub>

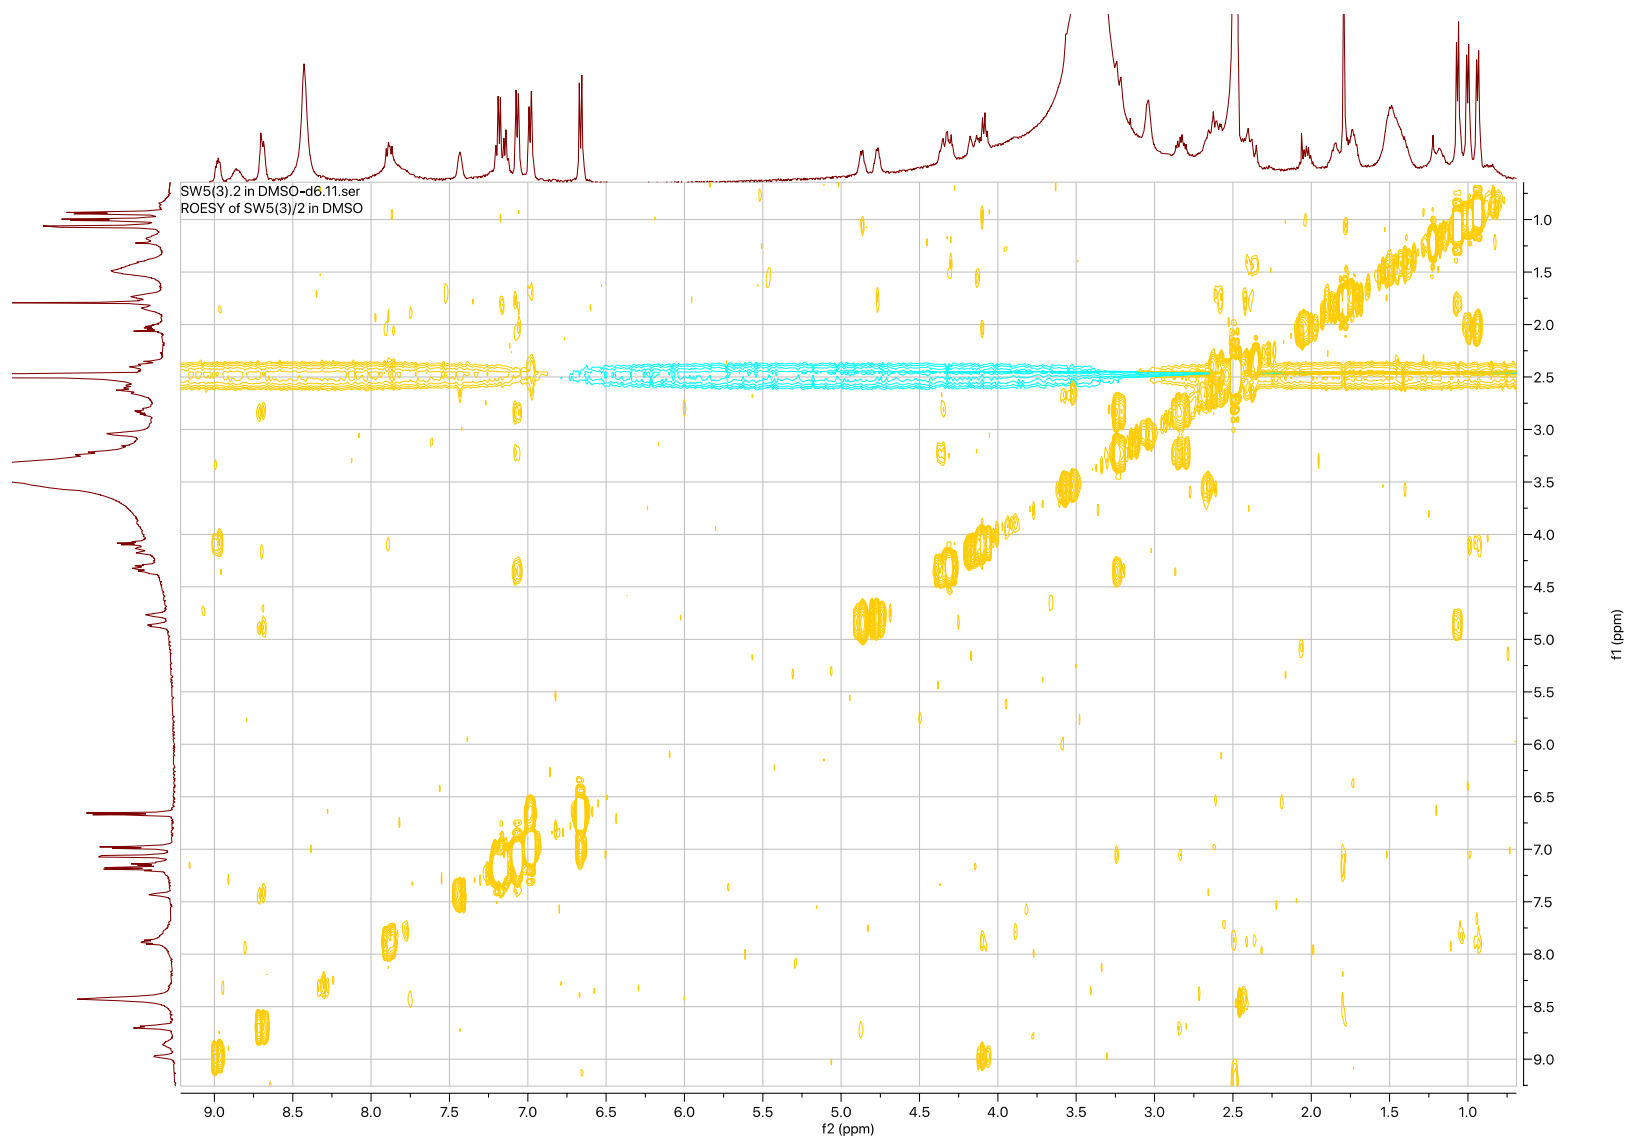



Figure S20. Negative HR ESI MS of Hydanto-anabaenopeptin B (2)

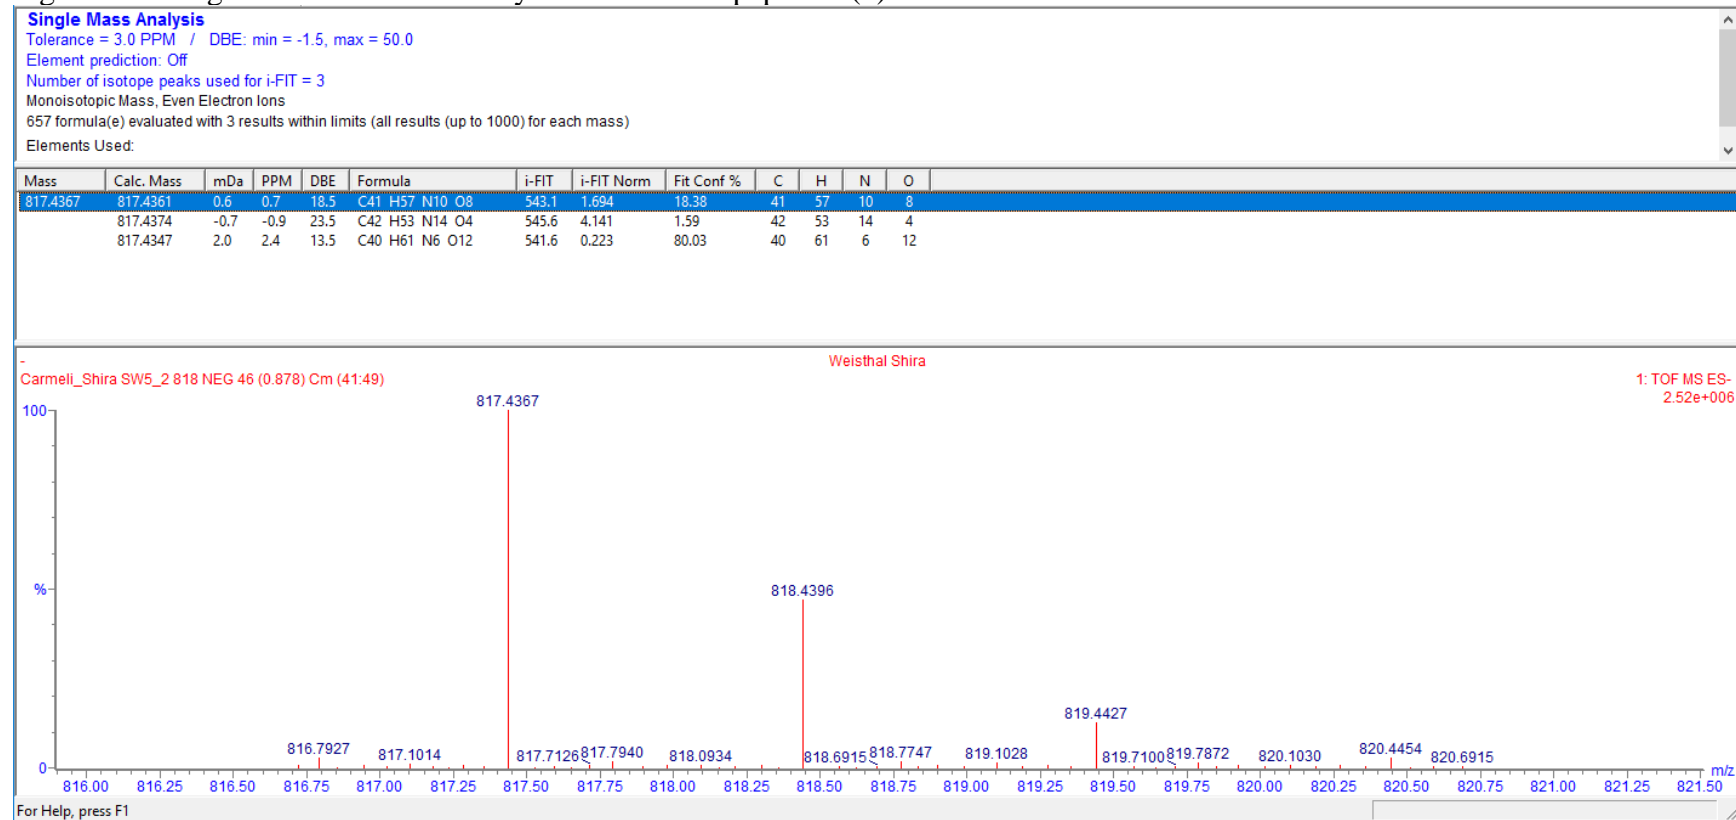

Figure S21. Positive HR ESI MS/MS Spectrum of Hydanto-anabaenopeptin B (2)

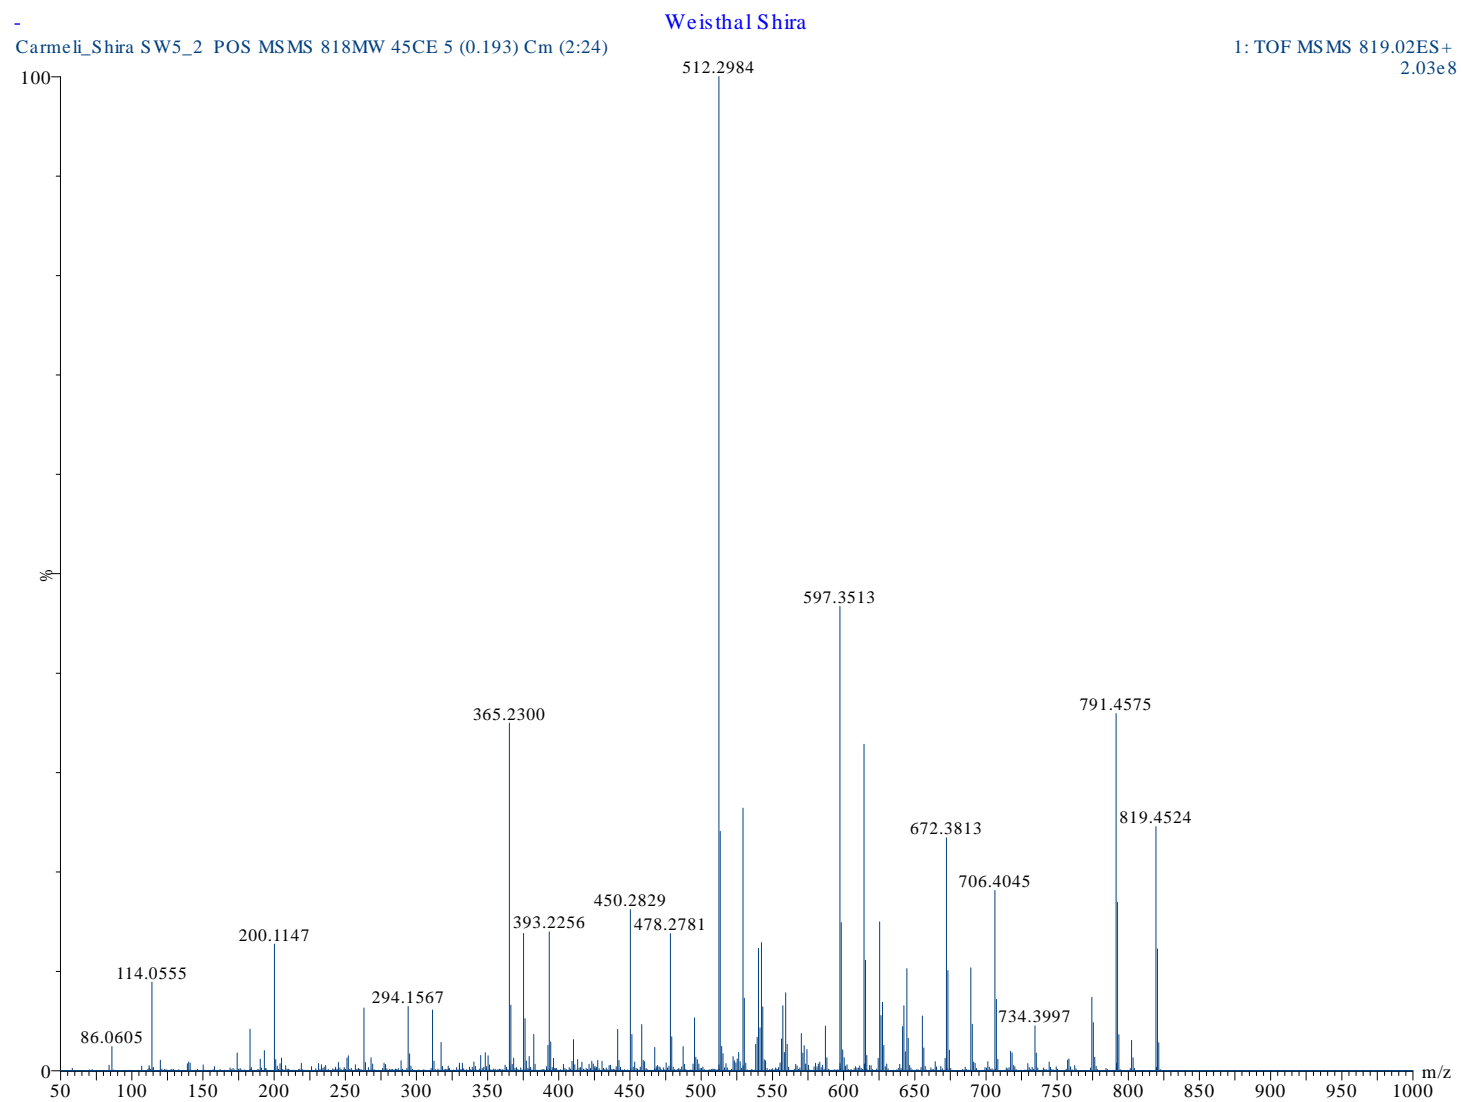

Figure S22. Scheme of Fragmentation in the Positive HR ESI MS/MS Spectrum of Hydanto-anabaenopeptin B (2)

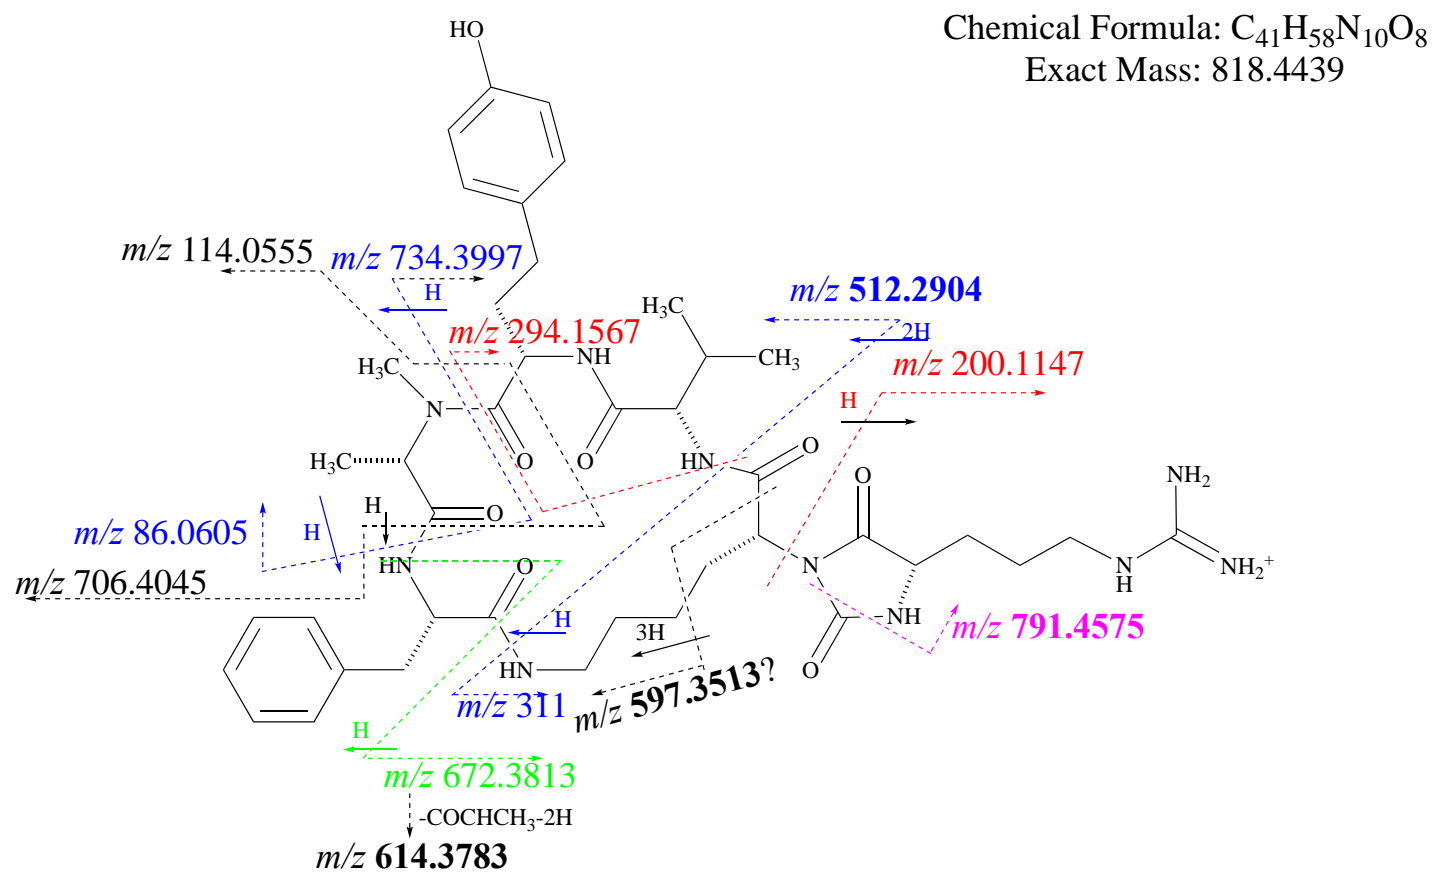

Figure S23. LCMS Traces of Marfey's Method Amino Acids Analysis of Hydanto-anabaenopeptin B (2)

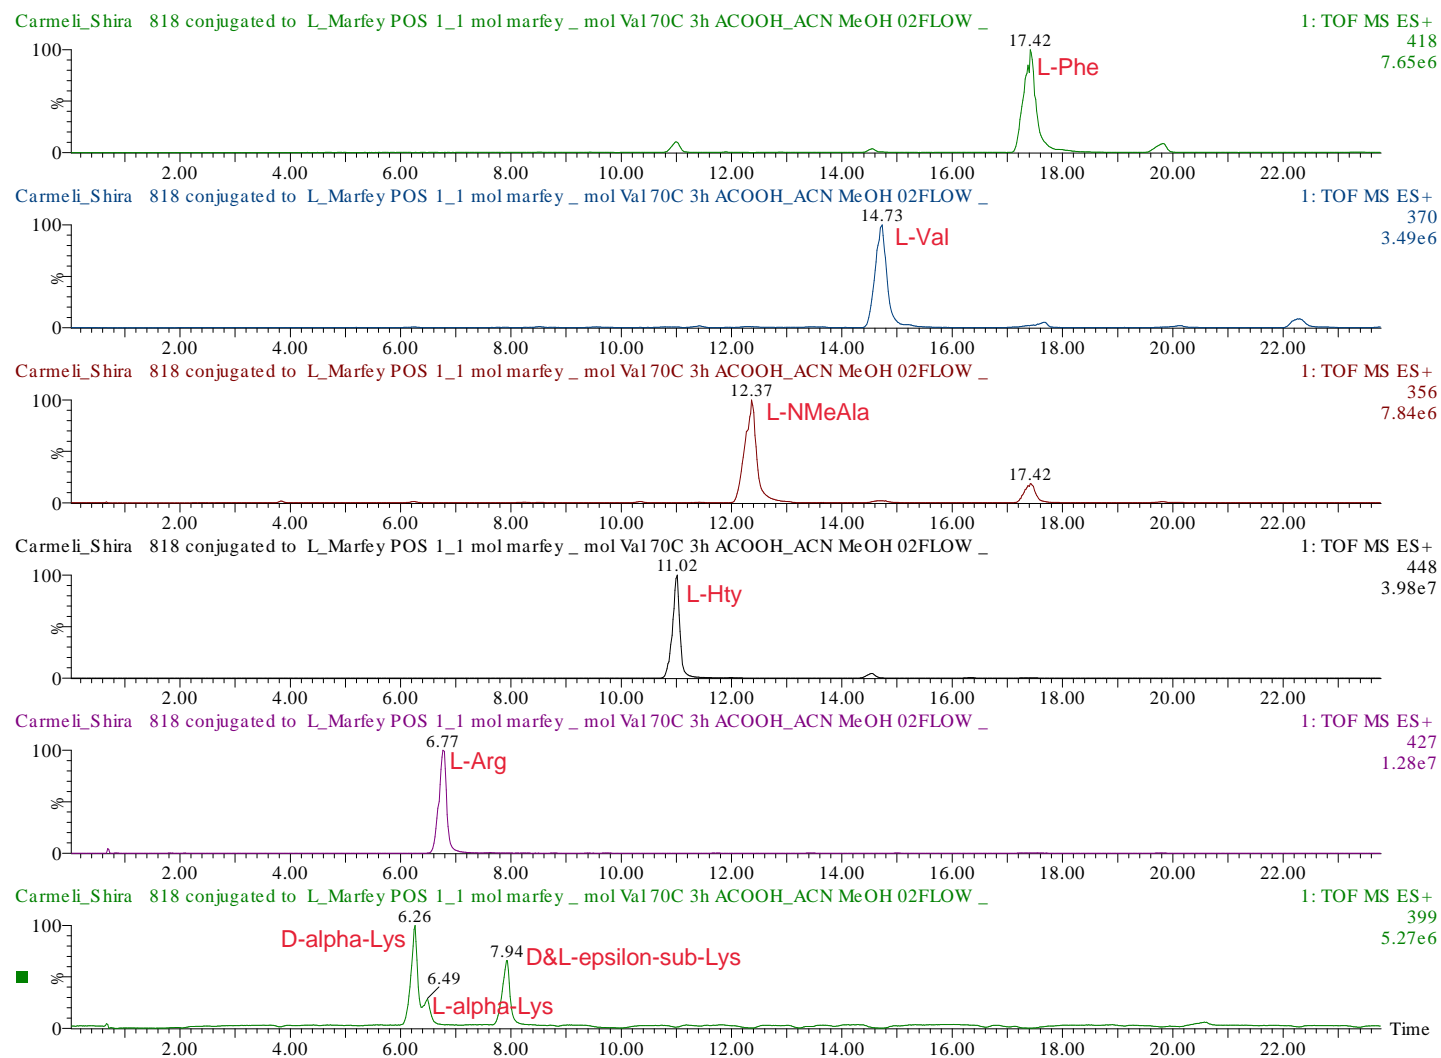

Table S2. NMR Data of Hydanto-anabaenopeptin B (**2**) in DMSO-*d*<sub>6</sub><sup>a</sup>

| Position                                             | $\delta_C$ , Mult.                                   | $\delta_H$ , Mult. ( <i>J</i> in Hz) <sup>b</sup> | HMBC correlations <sup>c</sup>         | COSY correlations                           | TOCSY correlations                     | ROESY correlations |
|------------------------------------------------------|------------------------------------------------------|---------------------------------------------------|----------------------------------------|---------------------------------------------|----------------------------------------|--------------------|
| Arg-1<br><i>Arg-1</i>                                | 174.6, C<br><i>174.3, C</i>                          |                                                   | Arg-2, 2-NH, Lys-6-NH,<br><i>Arg-2</i> |                                             |                                        |                    |
| Arg-2<br><i>Arg-2</i>                                | 55.9, CH<br><i>55.7, CH</i>                          | 4.17, t<br><i>4.14, t</i>                         | Arg-2-NH<br><i>Arg-2-NH</i>            | Arg-2-NH, 3a, 3b<br><i>Arg-2-NH, 3a, 3b</i> | Arg-3a, 3b, 5                          | Arg-2-NH           |
| Arg-2-NH<br><i>Arg-2-NH</i>                          |                                                      | 8.69, brs<br><i>8.70, brs</i>                     |                                        | Arg-2                                       |                                        | Arg-2              |
| Arg-3a<br>Arg-3b<br><i>Arg-3</i>                     | 28.8, CH <sub>2</sub><br><i>28.6, CH<sub>2</sub></i> | 1.73, m<br>1.52, m                                |                                        | Arg-2, 3b, 4a, 4b<br>Arg-2, 3a, 4a, 4b      | Arg-2, 3b, 4a, 4b<br>Arg-2, 3a, 4a, 4b |                    |
| Arg-4a<br>Arg-4b                                     | 24.2, CH <sub>2</sub>                                | 1.54, m<br>1.45, m                                |                                        | Arg-5                                       |                                        |                    |
| Arg-5                                                | 40.1, CH <sub>2</sub>                                | 3.04, brm                                         |                                        | Arg-4a, 4b, 5-NH                            | Arg-3a, 3b, 4a, 4b, 5-NH               |                    |
| Arg-6-NH                                             |                                                      | 8.86, brs                                         |                                        | Arg-5                                       | Arg-5, 4a, 4b                          |                    |
| Arg-7                                                | 156.7, C                                             |                                                   | Arg-4a, 4b, 6-NH                       |                                             |                                        |                    |
| Arg-7-NH <sub>2</sub> , NH <sub>2</sub> <sup>+</sup> |                                                      | 8.43, brs                                         |                                        |                                             |                                        |                    |
| CO<br><i>CO</i>                                      | 156.9, C<br><i>156.8, C</i>                          |                                                   | Arg-2-NH, Lys-6-NH                     |                                             |                                        |                    |
| Lys-1                                                | 168.2, C                                             |                                                   | Val-2, NH Lys-2                        |                                             |                                        |                    |
| Lys-2<br><i>Lys-2</i>                                | 56.4, CH<br><i>56.3, CH</i>                          | 4.30, t (4.1)<br><i>4.32, t (4.1)</i>             |                                        | Lys-3a, 3b                                  | Lys-3a, 3b, 4a, 4b, 5a, 5b             |                    |
| Lys-3a<br>Lys-3b<br><i>Lys-3</i>                     | 29.6, CH <sub>2</sub><br><i>29.4, CH<sub>2</sub></i> | 2.40, m<br>1.45, m                                | Lys-2                                  | Lys-2, 3b, 4b<br>Lys-2, 3a, 4b              | Lys-2, 3b, 4a, 4b<br>Lys-2, 3a, 4a, 4b | Val-NH             |
| Lys-4a                                               | 23.1, CH <sub>2</sub>                                | 1.51, m                                           |                                        | Lys-3a, 3b, 4b<br>Lys-3a, 3b, 4a            | Lys-6-NH                               |                    |

|          |                       |                                |                             |                      |                            |                    |
|----------|-----------------------|--------------------------------|-----------------------------|----------------------|----------------------------|--------------------|
| Lys-4b   |                       | 1.18, m                        |                             |                      | Lys-6-NH                   |                    |
| Lys-5a   | 28.5, CH <sub>2</sub> | 1.50, m                        |                             | Lys-4b, 6a, 6b,      | Lys-6-NH                   |                    |
| Lys-5b   |                       | 1.40, m                        |                             | Lys-5b, 6b           | Lys-6-NH                   |                    |
| Lys-5    | 28.4, CH <sub>2</sub> |                                |                             |                      |                            |                    |
| Lys-6a   | 38.5, CH <sub>2</sub> | 3.55, m                        | Lys-4a                      | Lys-5a, 5b, 6b, 6-NH | Lys-5a, 5b, 6b, 6-NH       | Lys-6b             |
| Lys-6b   |                       | 2.66, m                        |                             | Lys-5b, 6a, 6-NH     | Lys-5a, 5b, 6a, 6-NH       | Lys-6a             |
| Lys-6-NH |                       | 7.43, m                        |                             | Lys-6a, 6b           | Lys-4a, 4b, 5a, 5b, 6a, 6b | Phe-NH             |
| Val-1    | 172.4, C              |                                | Hty-NH, Val-2, 3            |                      |                            |                    |
| Val-2    | 57.9, CH              | 4.09, q (7.5)                  | Val-3, 4, 5                 | Val-3, NH            | Val-3, 4, 5, NH            | Hty-NH, Val-NH     |
| Val-NH   |                       | 7.87, d (7.5)                  |                             | Val-2                | Val-2, 3, 4, 5             | Val-2, 5, Lys-3a   |
| Val-NH   |                       | 7.89, d (7.5)                  |                             |                      |                            |                    |
| Val-3    | 30.5, CH              | 2.03, dqq (7.5, 6.6, 6.5)      | Val-4, 5                    | Val-2, 4, 5          | Val-NH                     | Val-4, 5, Phe-5,5' |
| Val-4    | 19.1, CH <sub>3</sub> | 1.00, d (6.6)                  | Val-2, 3, 5                 | Val-3                | Val-3                      |                    |
| Val-5    | 18.9, CH <sub>3</sub> | 0.94, d (6.5)                  | Val-2, 3, 4                 | Val-3                |                            | Val-3              |
| Val-5    | 18.8, CH <sub>3</sub> | 0.94, d (6.5)                  |                             |                      |                            |                    |
| Hty-1    | 171.1, C              |                                | NMeAla-2, NMe, Hty-2,3a, 3b |                      |                            |                    |
| Hty-2    | 48.9, CH              | 4.77, brdt (4.7, 6.5)          | Hty-3b                      | Hty-3a, 3b, NH       | Hty-3a, 3b, 4a, 4b, NH     |                    |
| Hty-NH   |                       | 8.98, d (4.7)<br>8.98, d (4.7) |                             | Hty-2                | Hty-2, 4a                  | Val-2              |
| Hty-3a   | 33.4, CH <sub>2</sub> | 1.85, m                        | Hty-2, 2-NH, 4b             | Hty-2, 3b, 4a, 4b    | Hty-2, 3b, 4a, 4b          |                    |
| Hty-3b   |                       | 1.74, m                        |                             | Hty-2, 3a, 4a, 4b    | Hty-2, 3a, 4a, 4b          |                    |
| Hty-4a   | 30.7, CH <sub>2</sub> | 2.61, m                        | Hty-6,6'                    | Hty-3a, 3b, 4b       | Hty-2, 3a, 3b, 4b          | Hty-6,6'           |
| Hty-4b   |                       | 2.42, m                        |                             | Hty-3a, 3b, 4a       | Hty-2, 3a, 3b, 4a          |                    |
| Hty-5    | 131.1, C              |                                | Hty-4a,4b,7,7'              |                      |                            |                    |
| Hty-6,6' | 129.2, CH<br>x2       | 6.98, d (8.5)                  | Hty-4a, 4b, 6',6, 7,7'      |                      |                            | Hty-3a, 7,7'       |

|            |                       |                            |                     |                |                |                                          |
|------------|-----------------------|----------------------------|---------------------|----------------|----------------|------------------------------------------|
| Hty-7,7'   | 115.3, CH<br>x2       | 6.66, d (8.5)              | Hty-6,6', 7',7      |                |                | Hty-6,6'                                 |
| Hty-8      | 155.8, C              |                            | Hty-6,6', 7,7'      |                |                |                                          |
| NMeAla-1   | 170.0, C              |                            | NMeAla-2, 2-NH, 3   |                |                |                                          |
| NMeAla-2   | 54.6, CH              | 4.87, dq (2.7,<br>6.7)     | NMeAla-3, NMe       | NMeAla-3       |                | NMeAla-3                                 |
| NMeAla-NMe | 27.3, CH <sub>3</sub> | 1.79, s                    | NMeAla-2            |                |                | NMeAla-3                                 |
| NMeAla-3   | 14.1, CH <sub>3</sub> | 1.07, d (6.7)              | NMeAla-2            | NMeAla-2       | NMeAla-2       | NMeAla-2, NMe                            |
| Phe-1      | 171.2, C              |                            | Lys-6-NH, Phe-3b    |                |                |                                          |
| Phe-2      | 55.1, CH              | 4.36, m                    | Phe-3b              | Phe-3a, 3b, NH | Phe-3a, 3b, NH | Phe-3a, 3b, 5,5'                         |
| Phe-NH     |                       | 8.70, (9.0)<br>8.69, (8.0) |                     | Phe-2          | Phe-2, 3a, 3b  | Lys-6-NH, Phe-3b                         |
| Phe-3a     | 37.7, CH <sub>2</sub> | 3.23, brd<br>(13.2)        | Phe-5,5'            | Phe-2, 3b      | Phe-NH         | Phe-2, 3b, 5,5'                          |
| Phe-3b     |                       | 2.83, dd (13.2,<br>5.6)    |                     | Phe-2, 3a      | Phe-NH         | Phe-3a, 5,5'                             |
| Phe-4      | 138.4, C              |                            | Phe-3a, 3b, 6,6'    |                |                |                                          |
| Phe-5,5'   | 129.0, CH<br>x2       | 7.07, d (7.1)              | Phe-3a, 3b, 5',5, 7 | Phe-6,6'       |                | NMeAla-NMe, Val-<br>3, 5, Phe-2, 3a, 3b, |
| Phe-6,6'   | 128.5, CH<br>x2       | 7.19, t (7.1)              | Phe-6',6            | Phe-5,5', 7    |                | NMeAla-NMe                               |
| Phe-7      | 126.3, CH             | 7.14, t (7.1)              | Phe-5,5'            | Phe-6,6'       |                |                                          |

<sup>a</sup>500 MHz for <sup>1</sup>H and 125 MHz for <sup>13</sup>C, ca. 1:1 major rotamer, *minor rotamer*. <sup>b</sup>From HSQC correlations. <sup>c</sup>*J*<sub>C-H</sub>=8 Hz.

Figure S24. LCMS Chromatogram and Mass spectrum of Hydanto-anabaenopeptin B (2)

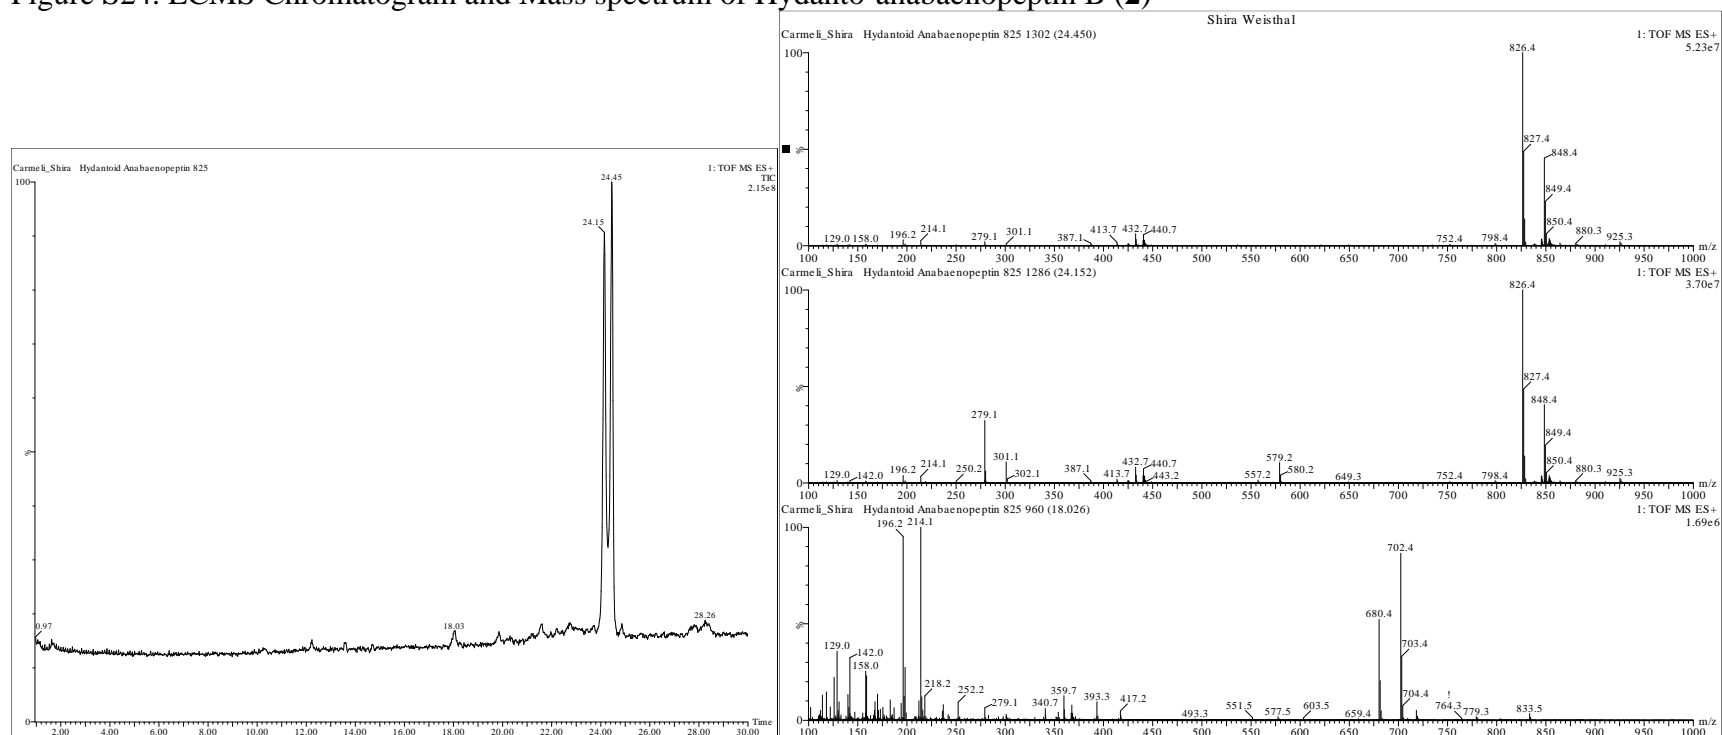



Figure S25.  $^1\text{H}$  NMR Spectrum of Hydanto-anabaeno-peptin F (**3**) in  $\text{DMSO}-d_6$

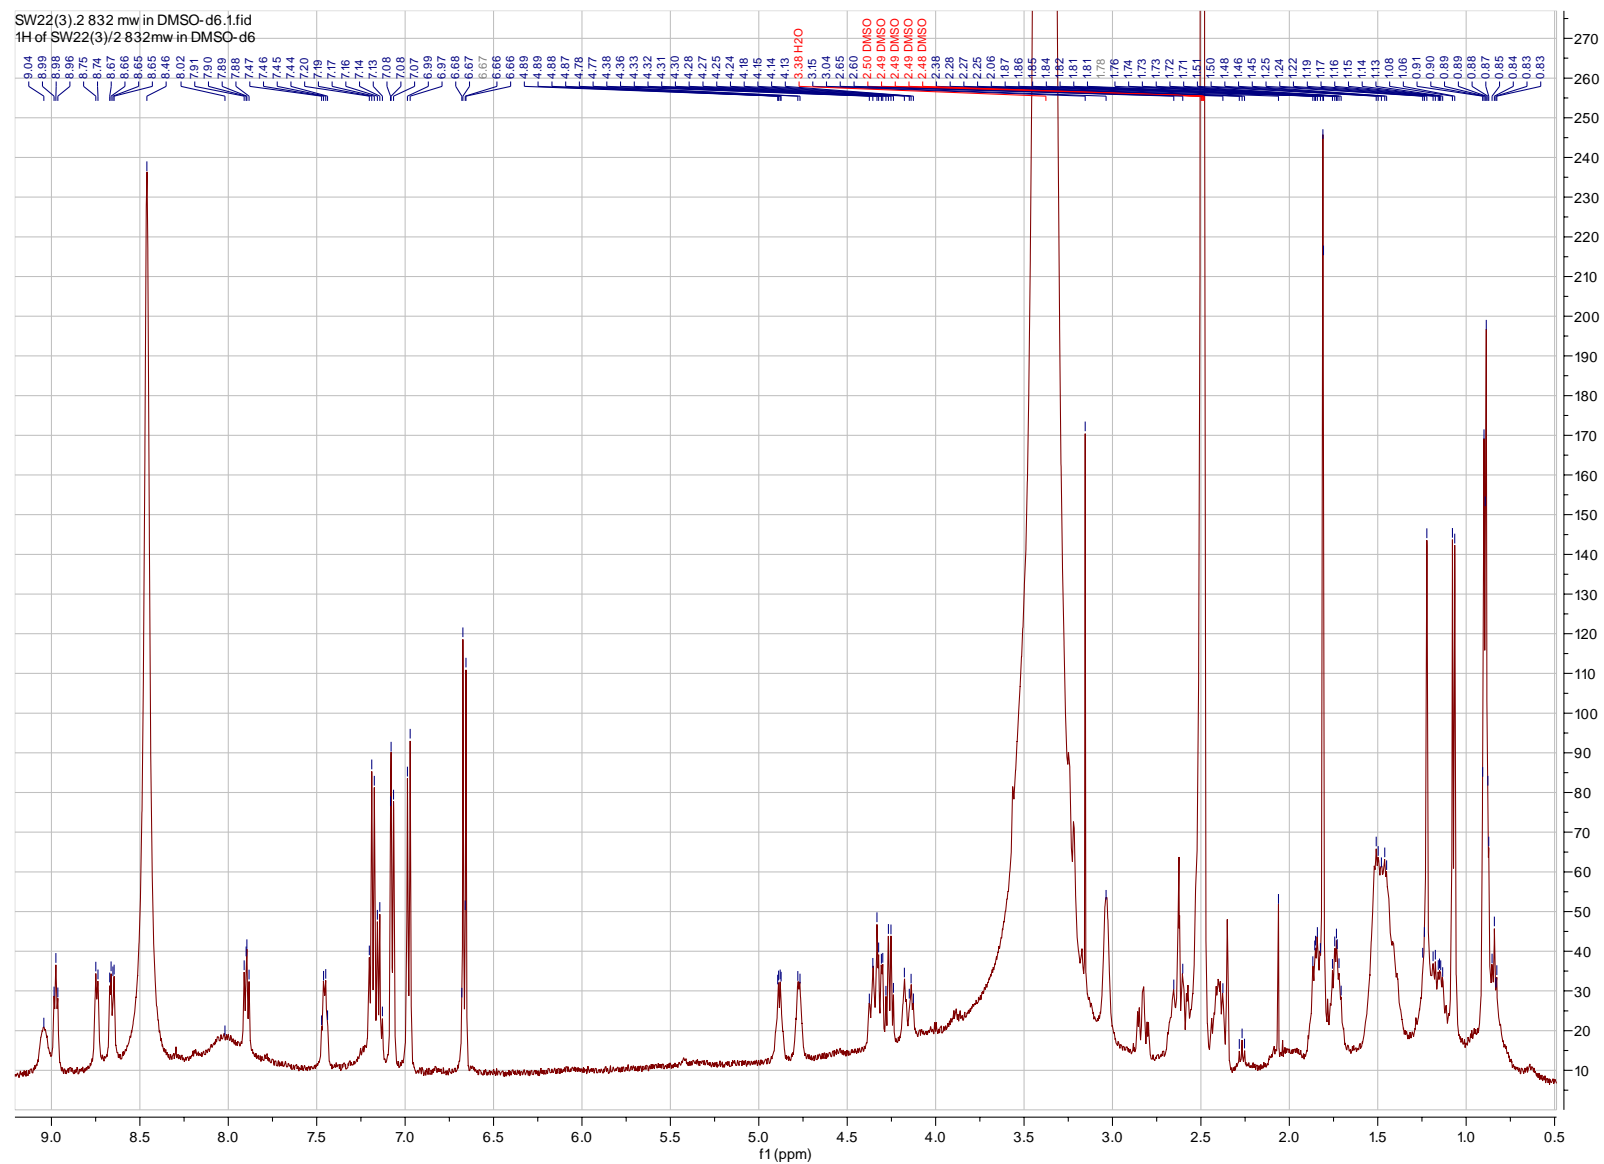

Figure S26.  $^{13}\text{C}$  NMR Spectrum of Hydanto-anabaenopeptin F (**3**) in  $\text{DMSO}-d_6$

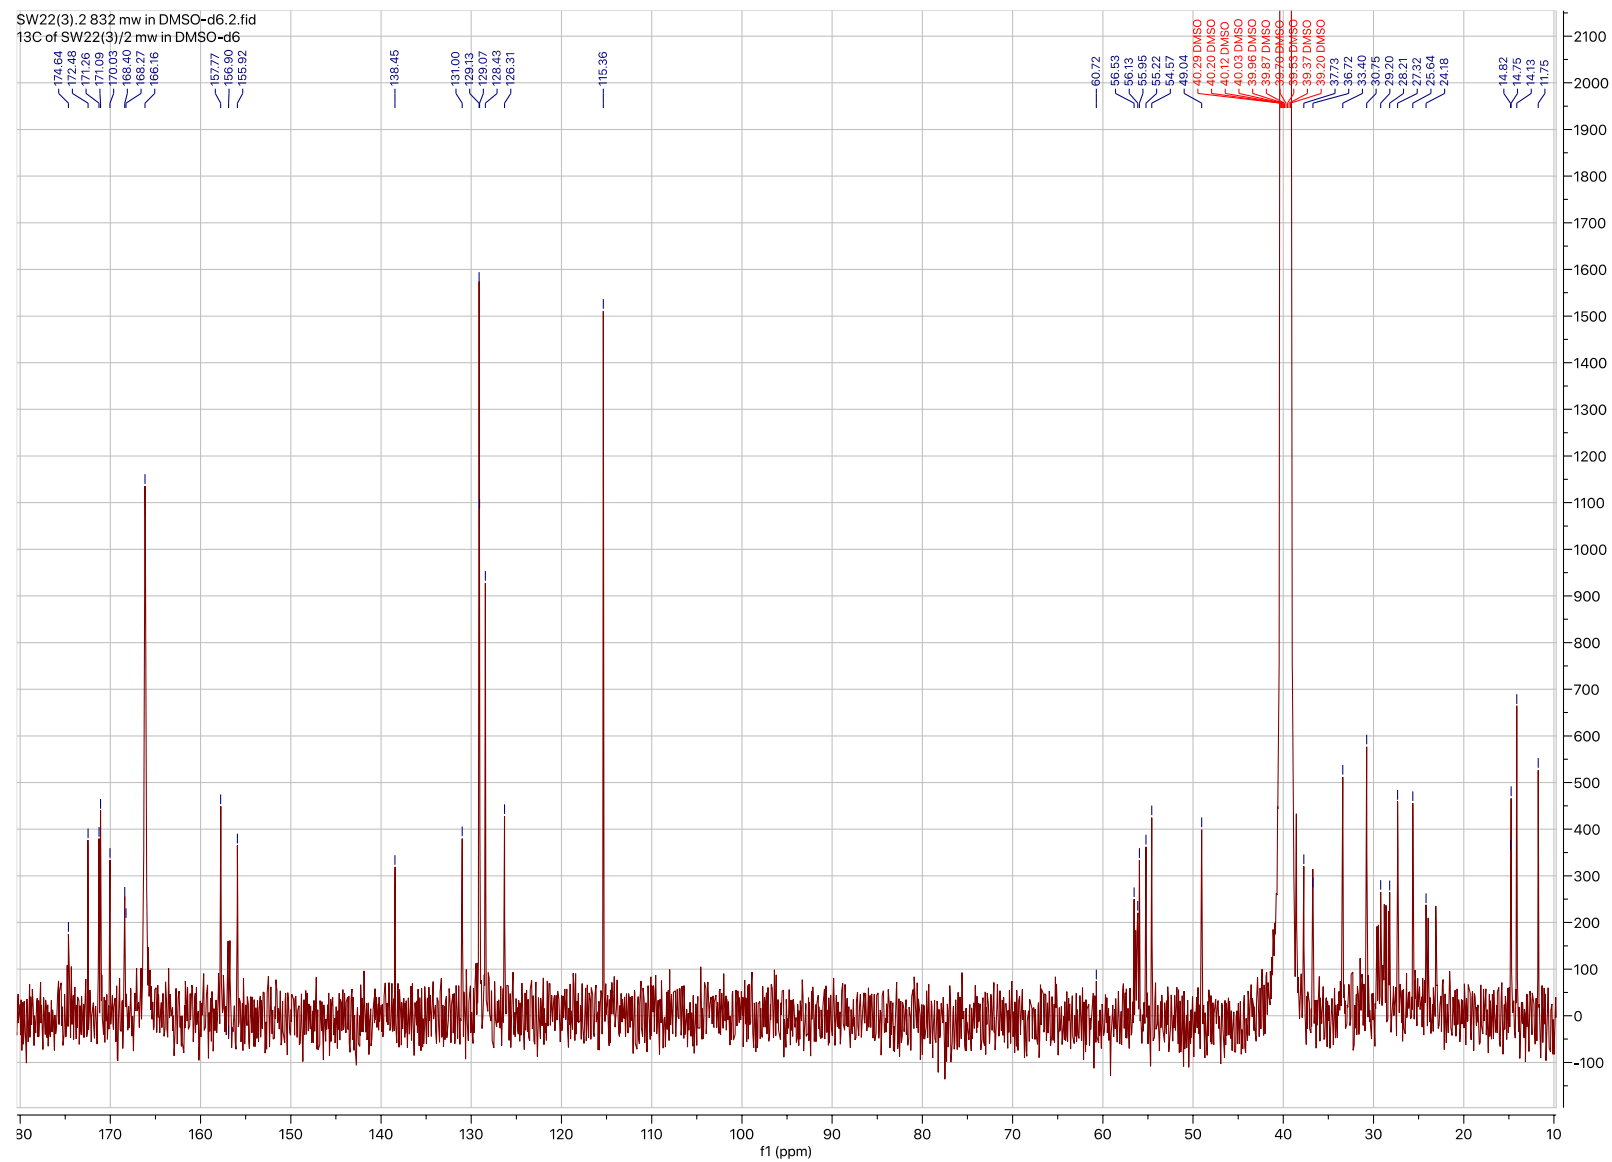

Figure S27. HSQC Spectrum of Hydanto-anabaenopeptin F (**3**) in DMSO- $d_6$

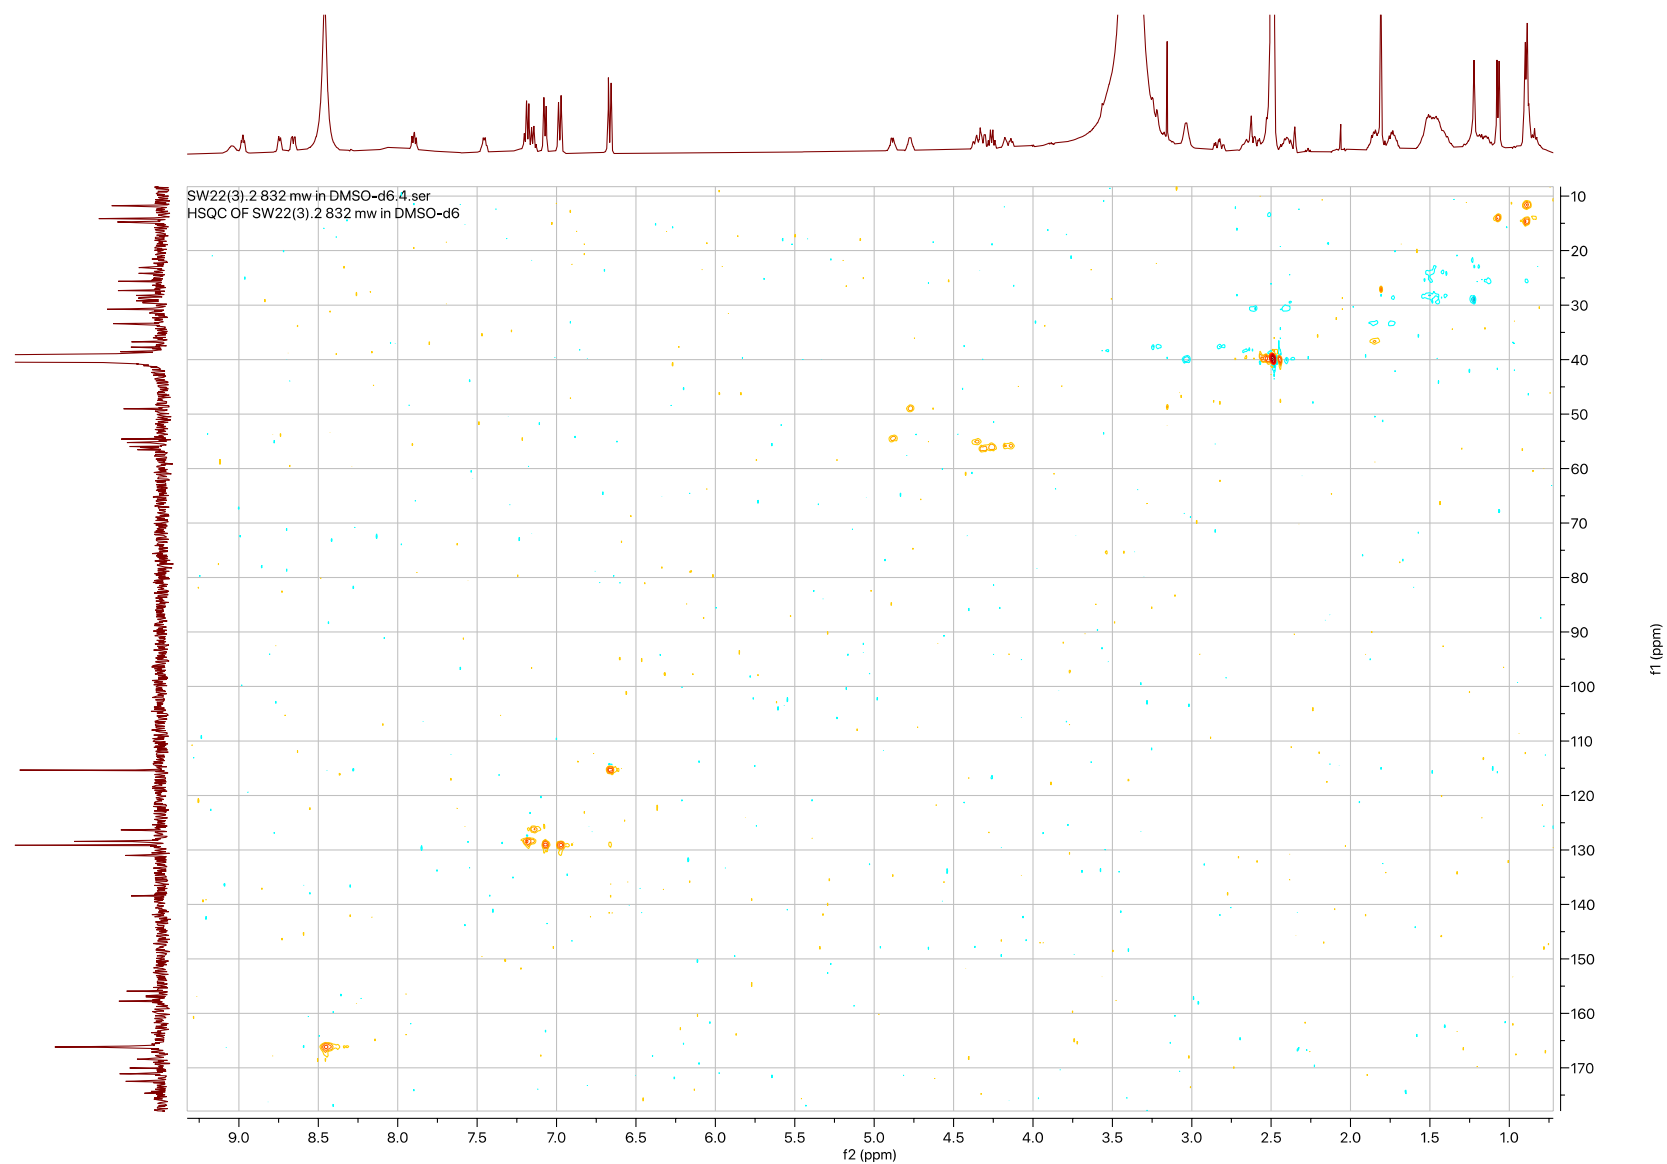

Figure S28. HMBC Spectrum of Hydanto-anabaenopeptin F (**3**) in DMSO-*d*<sub>6</sub>

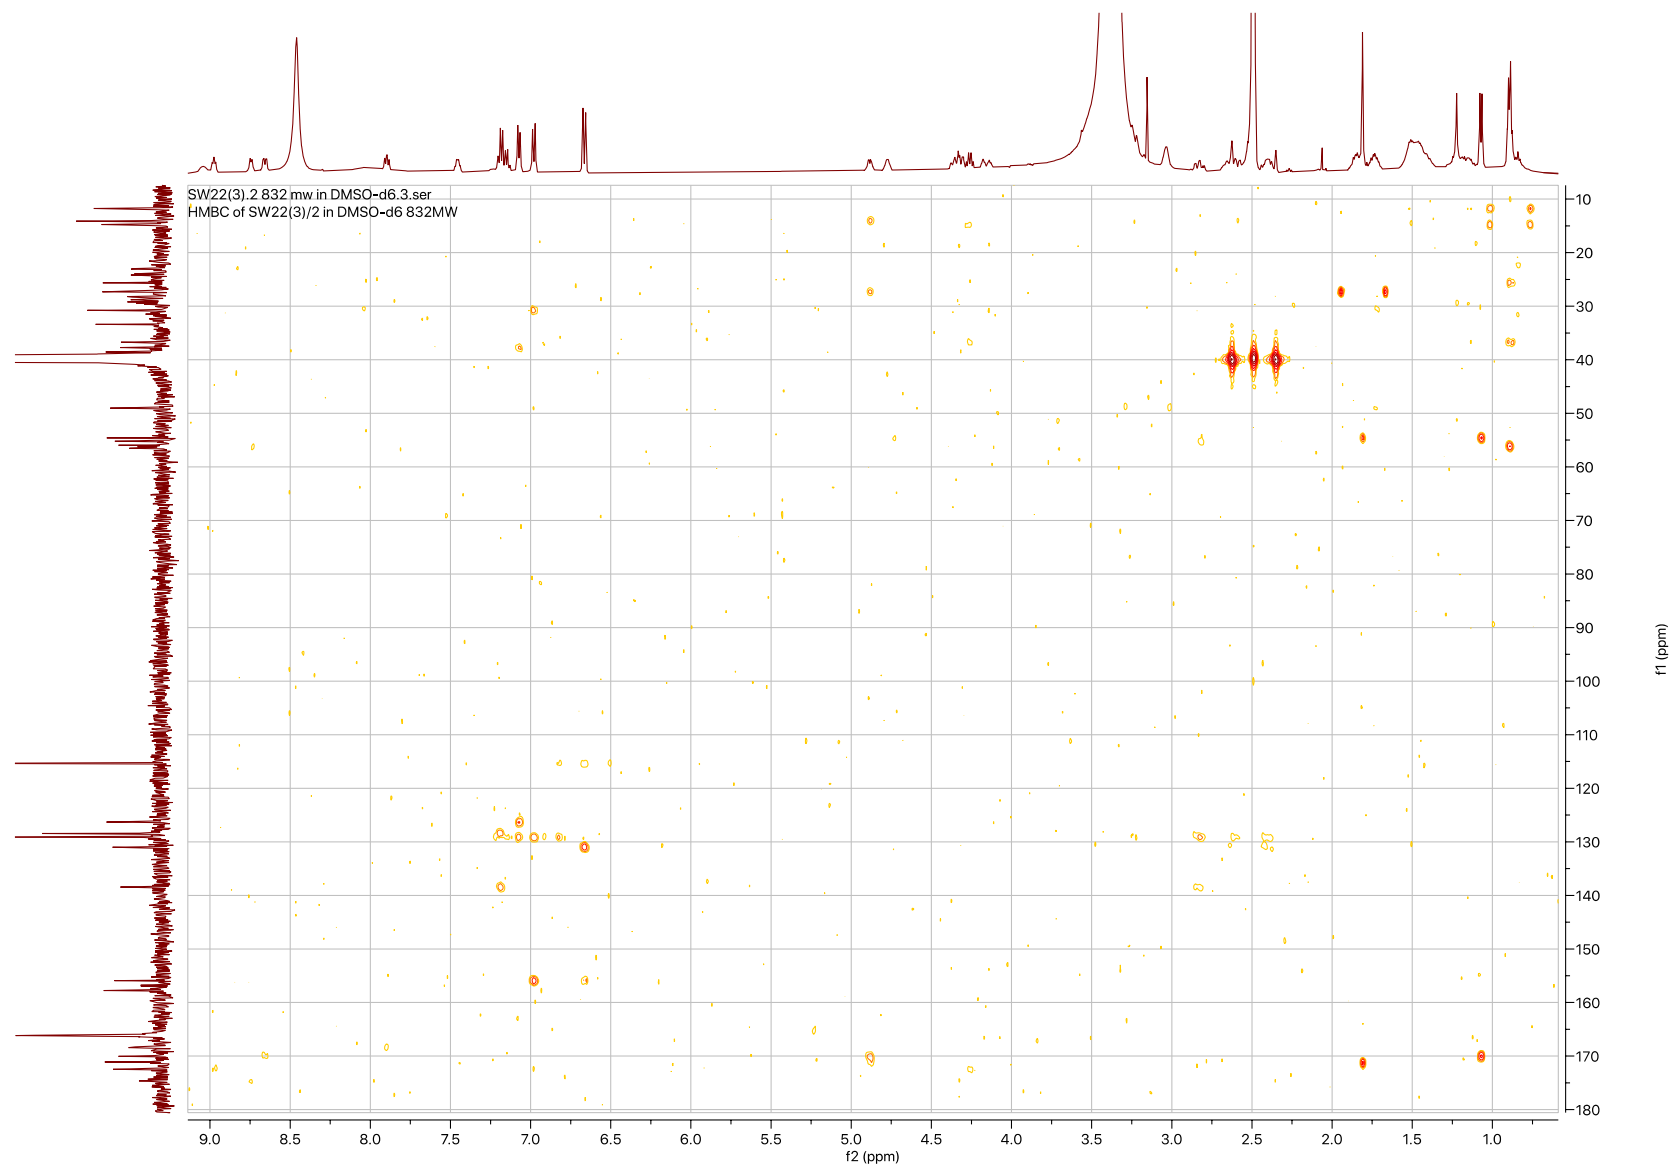

Figure S29. COSY Spectrum of Hydanto-anabaenopeptin F (**3**) in DMSO-*d*<sub>6</sub>

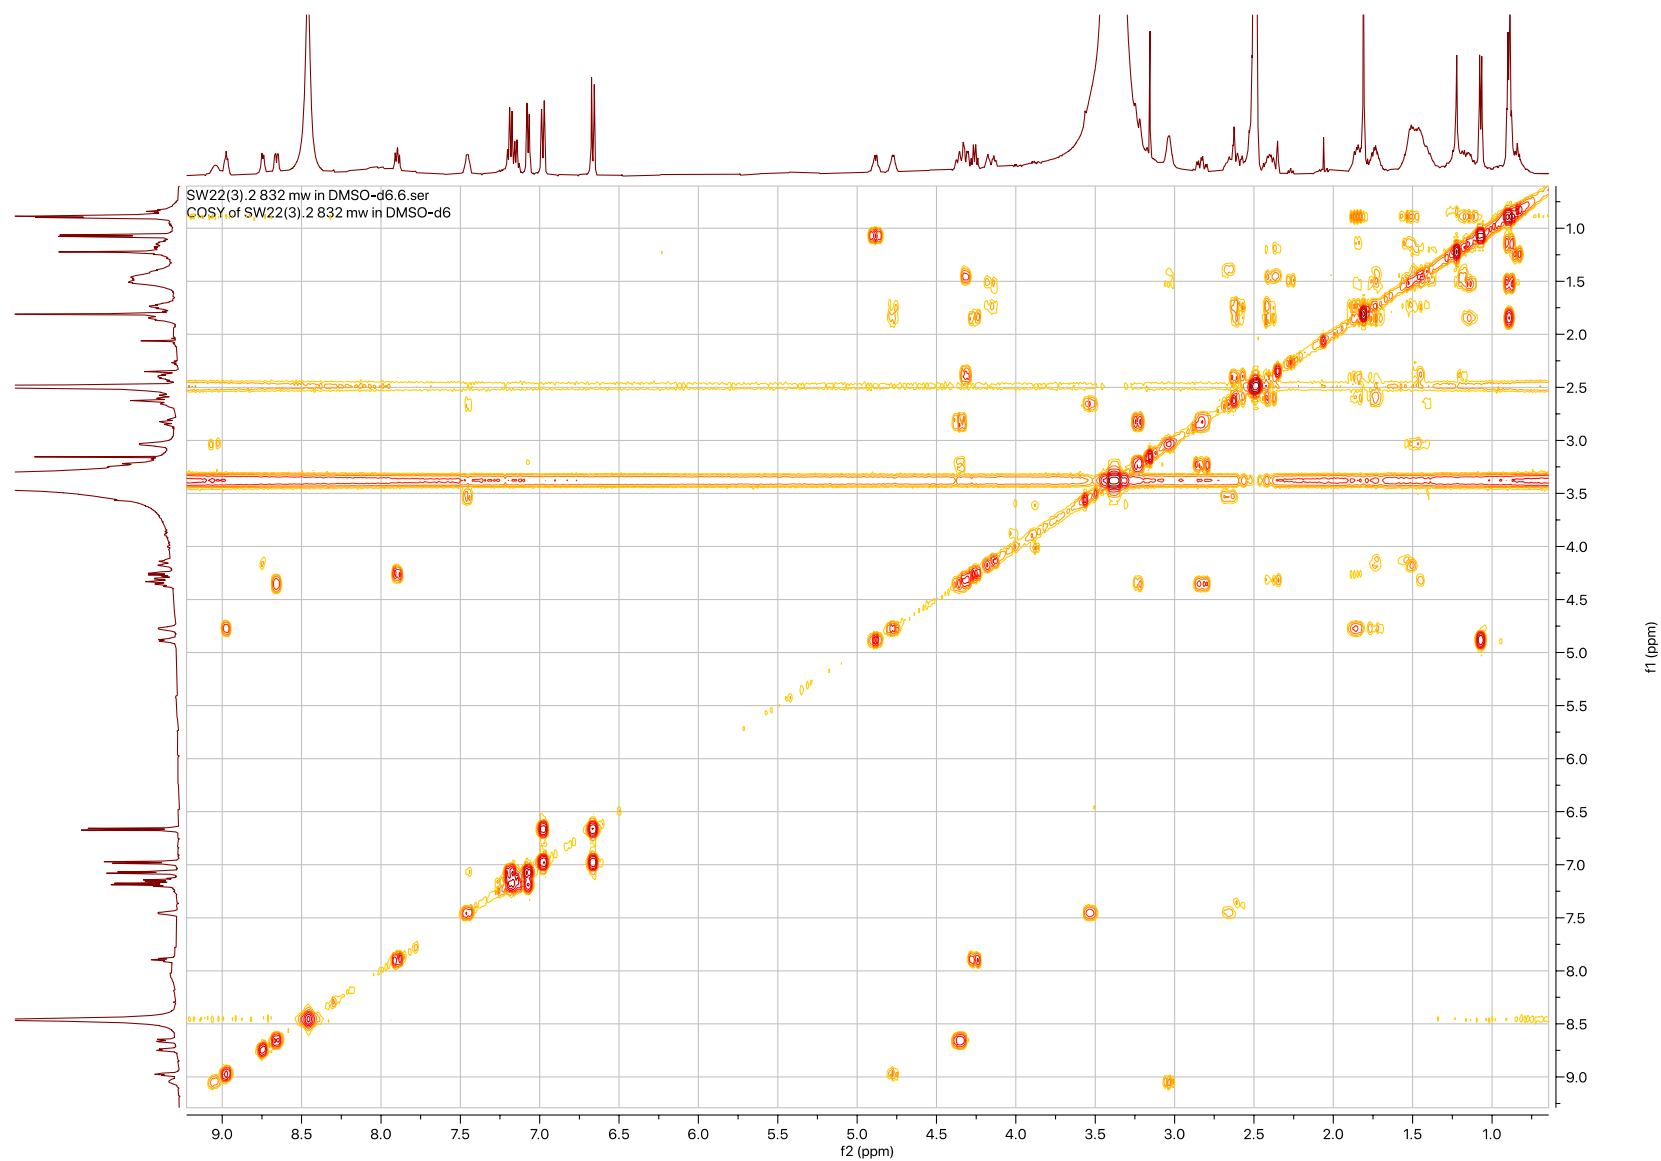

Figure S30. TOCSY Spectrum of Hydanto-anabaenopeptin F (**3**) in DMSO-*d*<sub>6</sub>

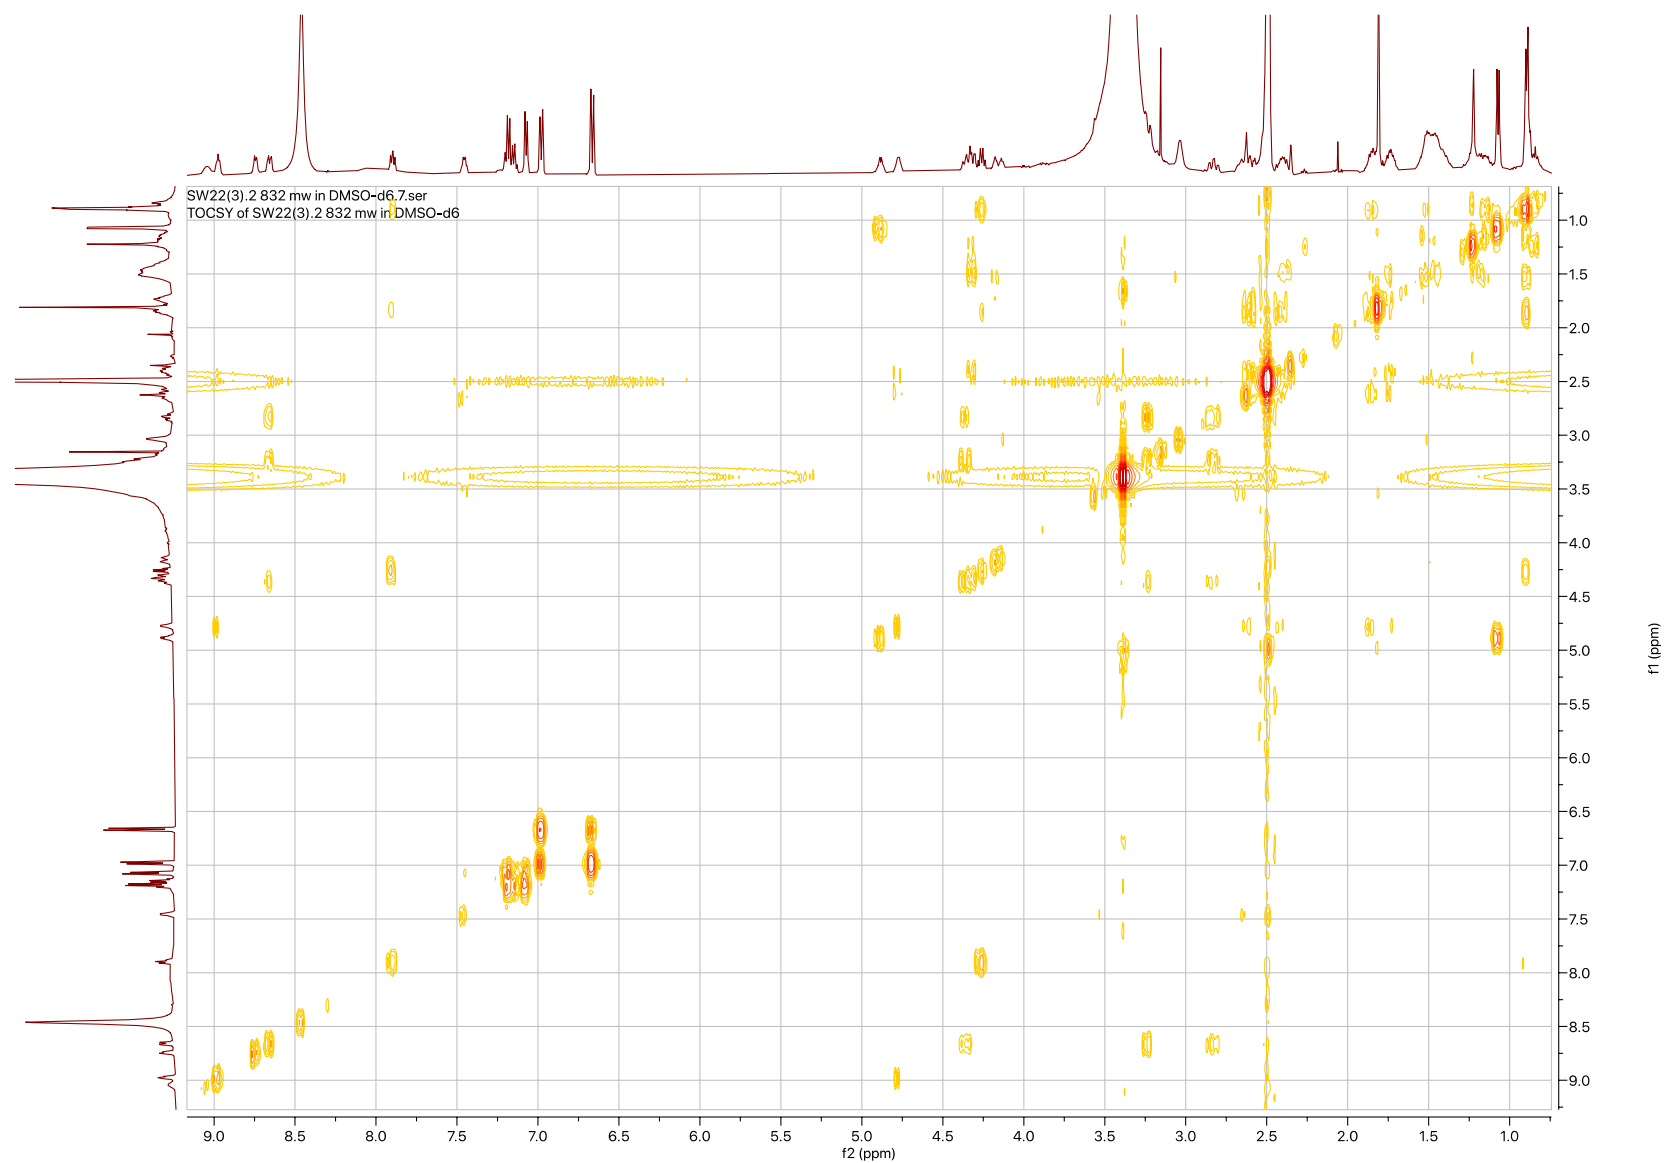

Figure S31. ROESY Spectrum of Hydanto-anabaenopeptin F (**3**) in DMSO-*d*<sub>6</sub>

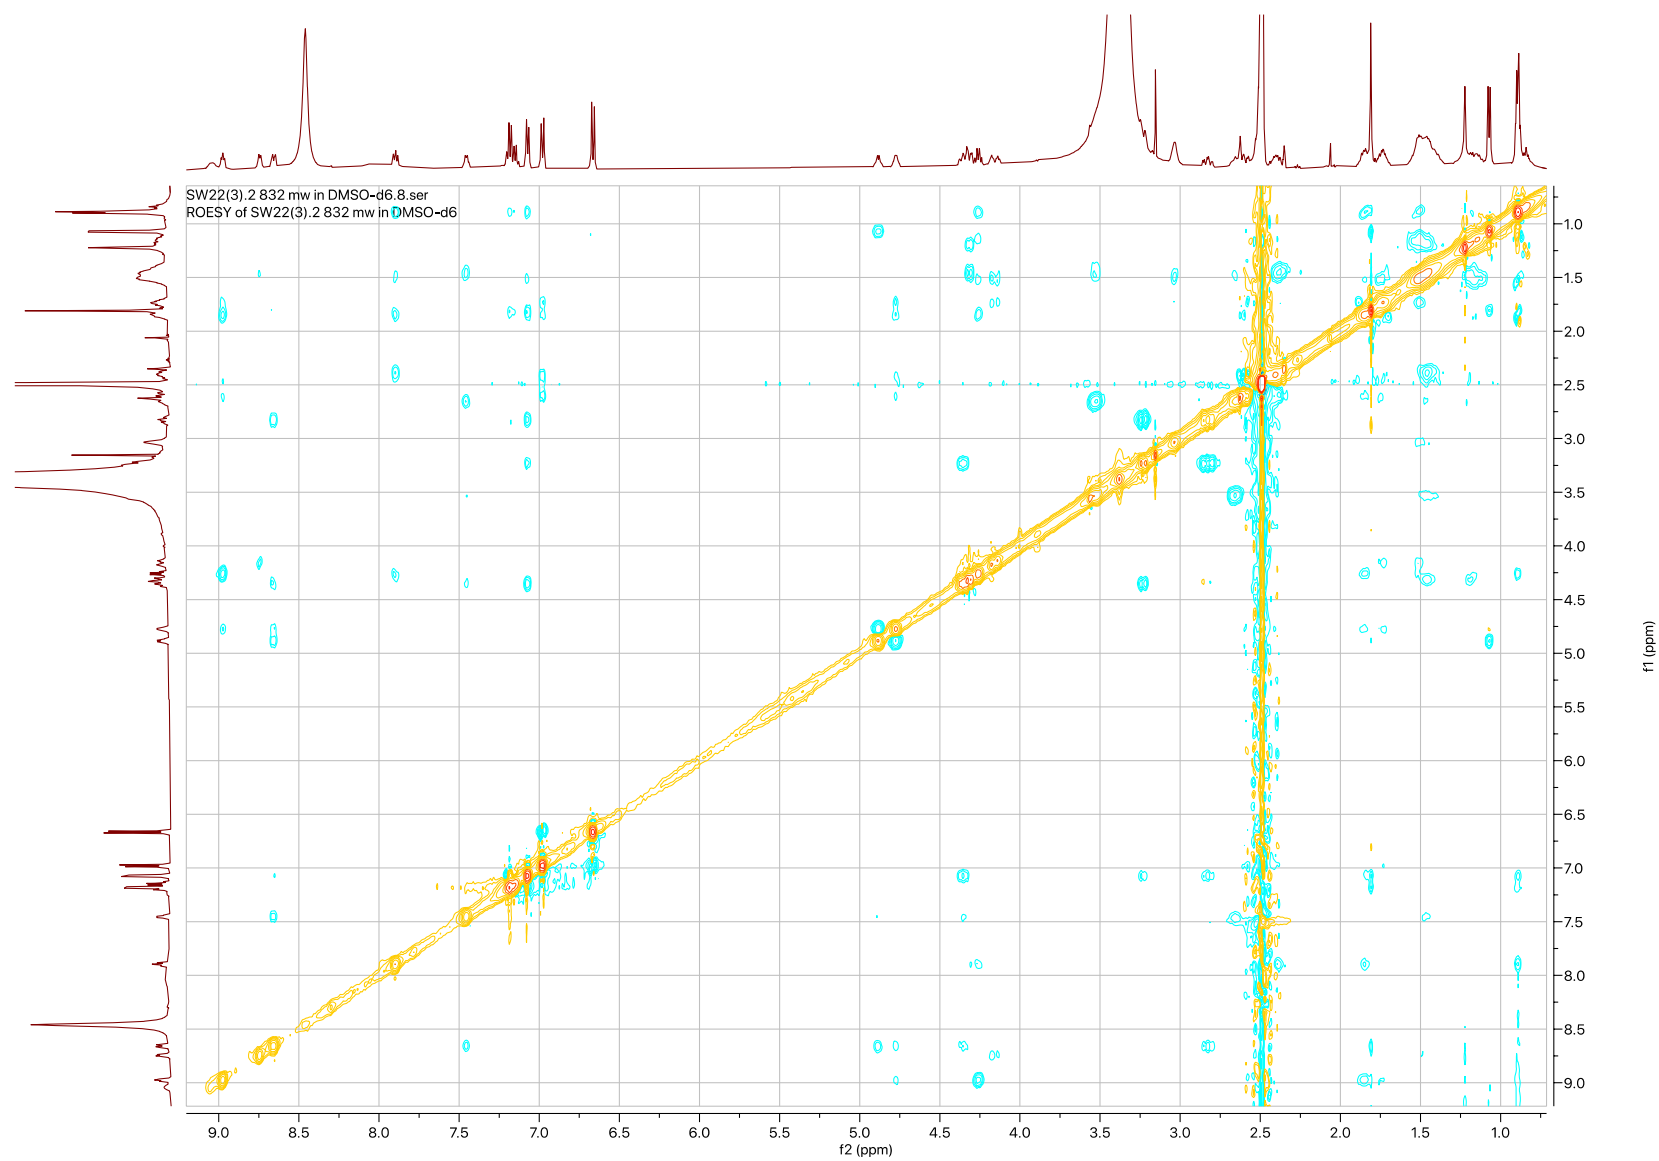

Figure S32. Negative HR ESI MS of Hydanto-anabaenopeptin F (3)

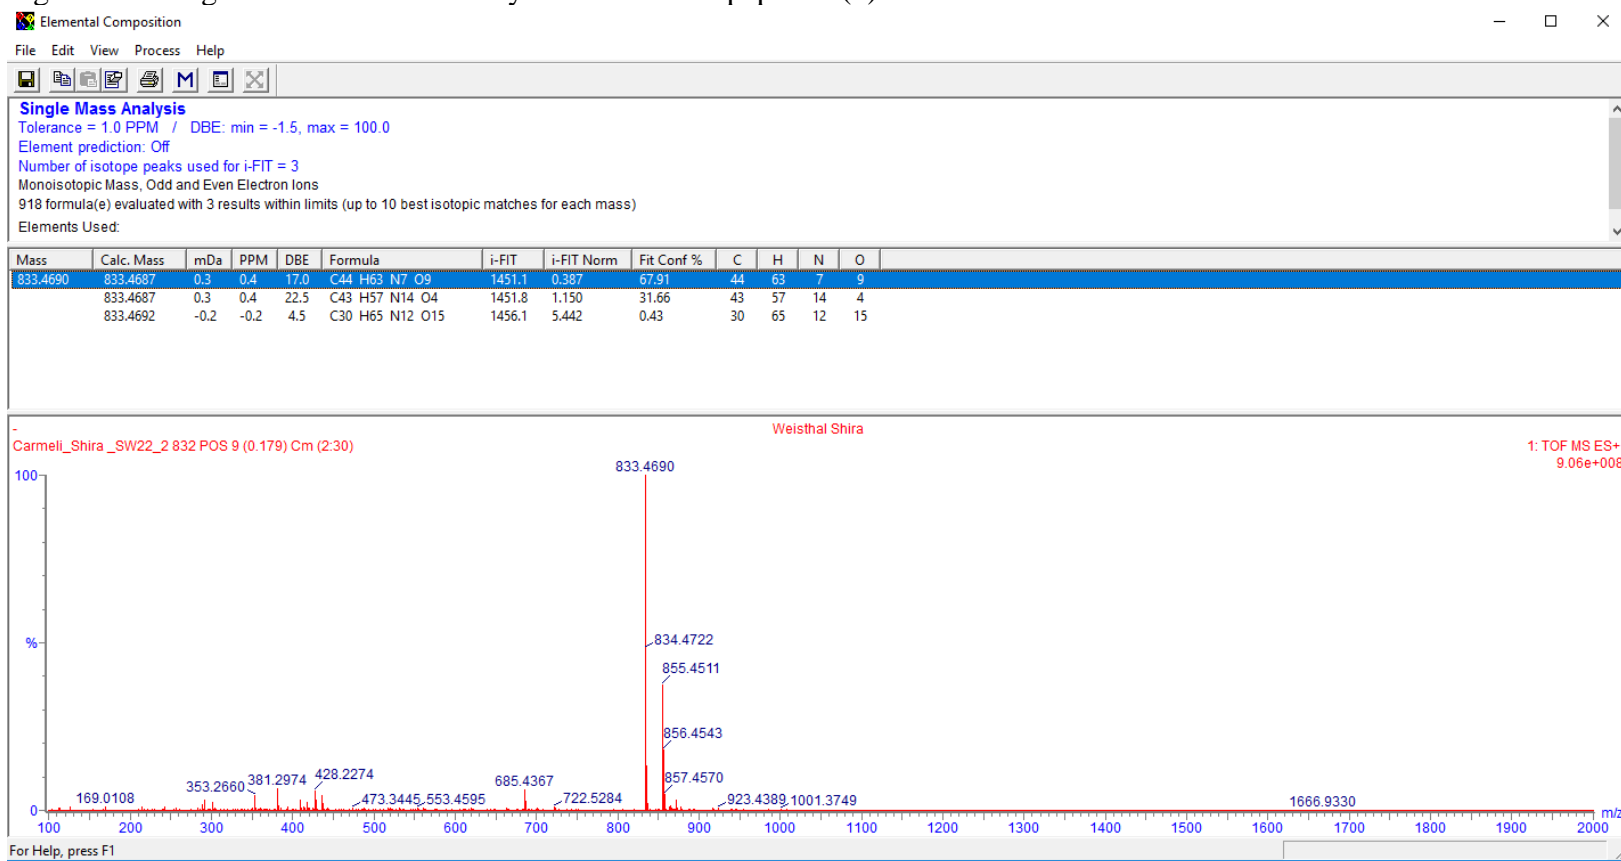



Figure S33. Positive HR ESI MS/MS Spectrum of Hydanto-anabaenopeptin F (**3**)

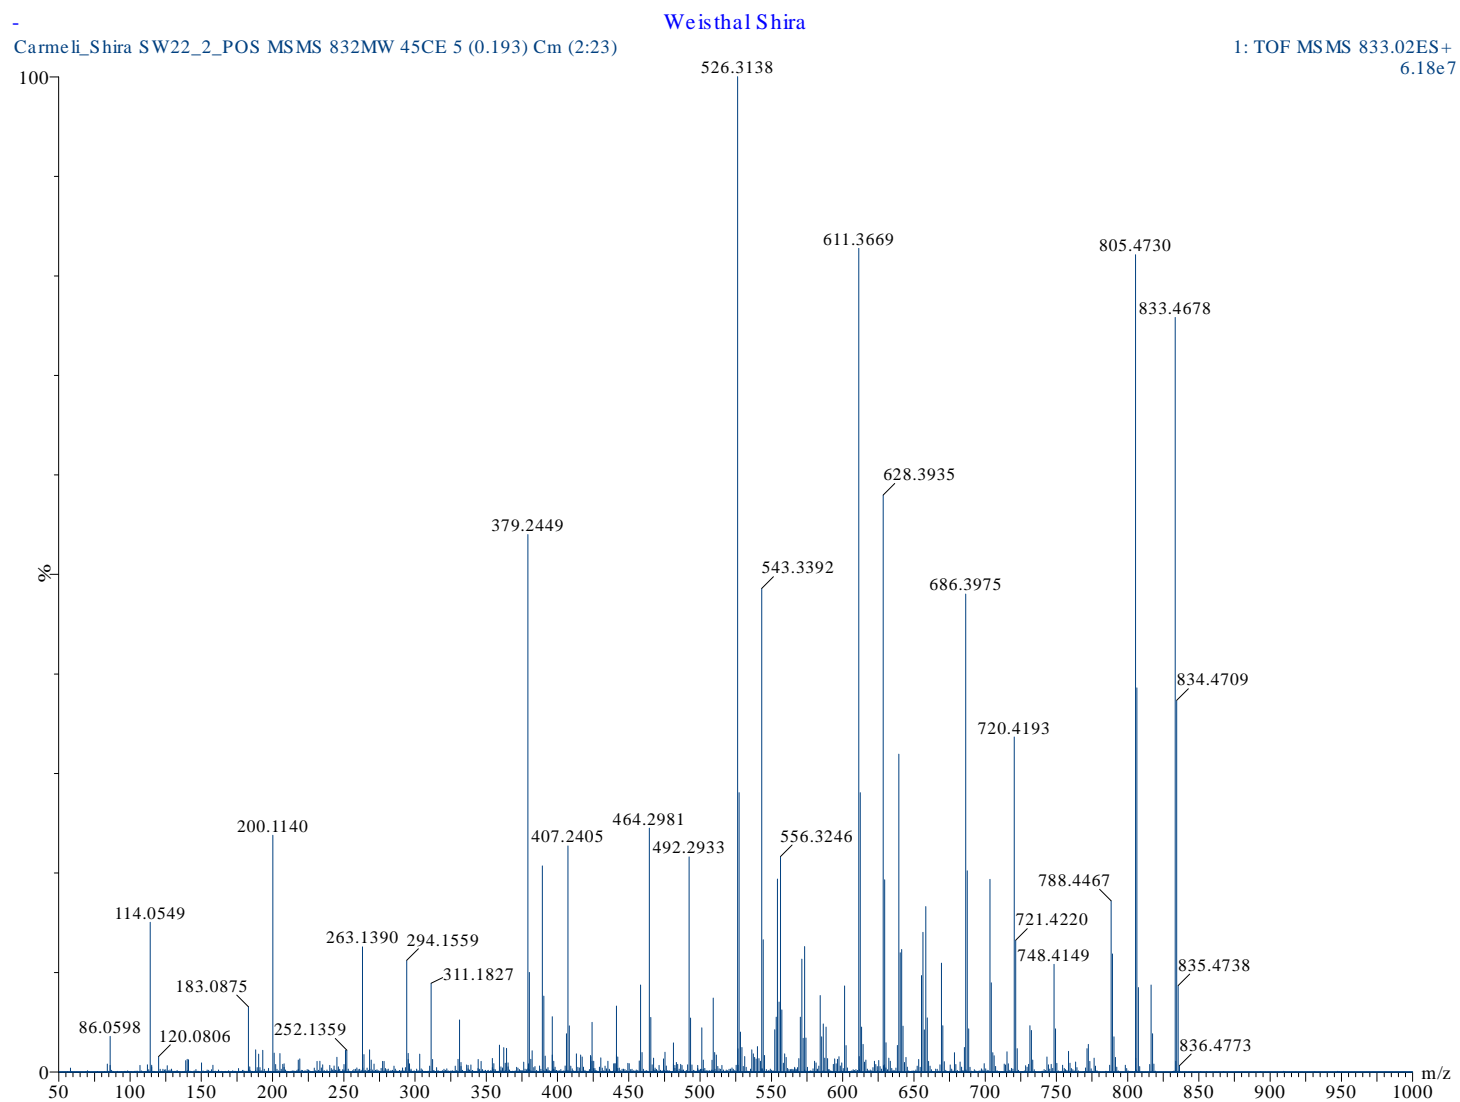

Figure S34. Scheme of Fragmentation in the Positive HR ESI MS/MS Spectrum of Hydanto-anabaenopeptin F (**3**)

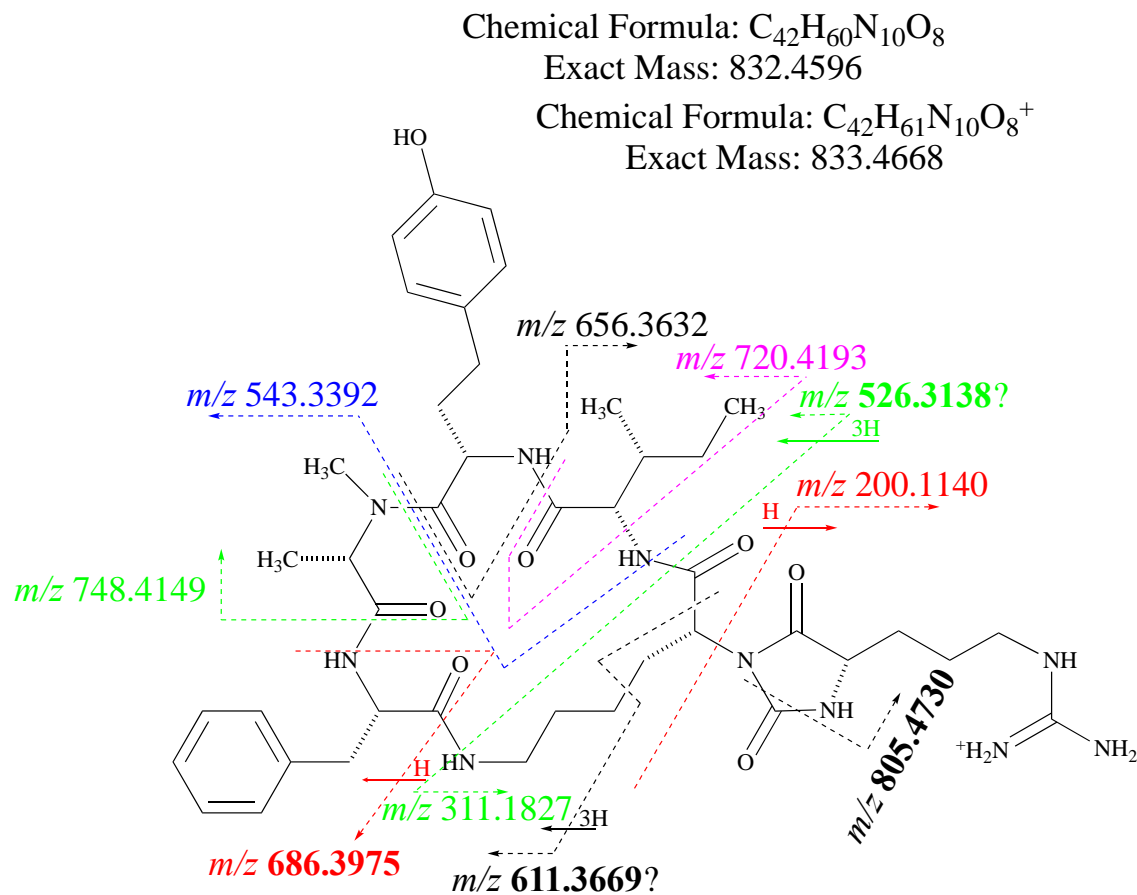

Figure S35. LCMS Traces of Marfey's Method Amino Acids Analysis of Hydanto-anabaenopeptin F (3)

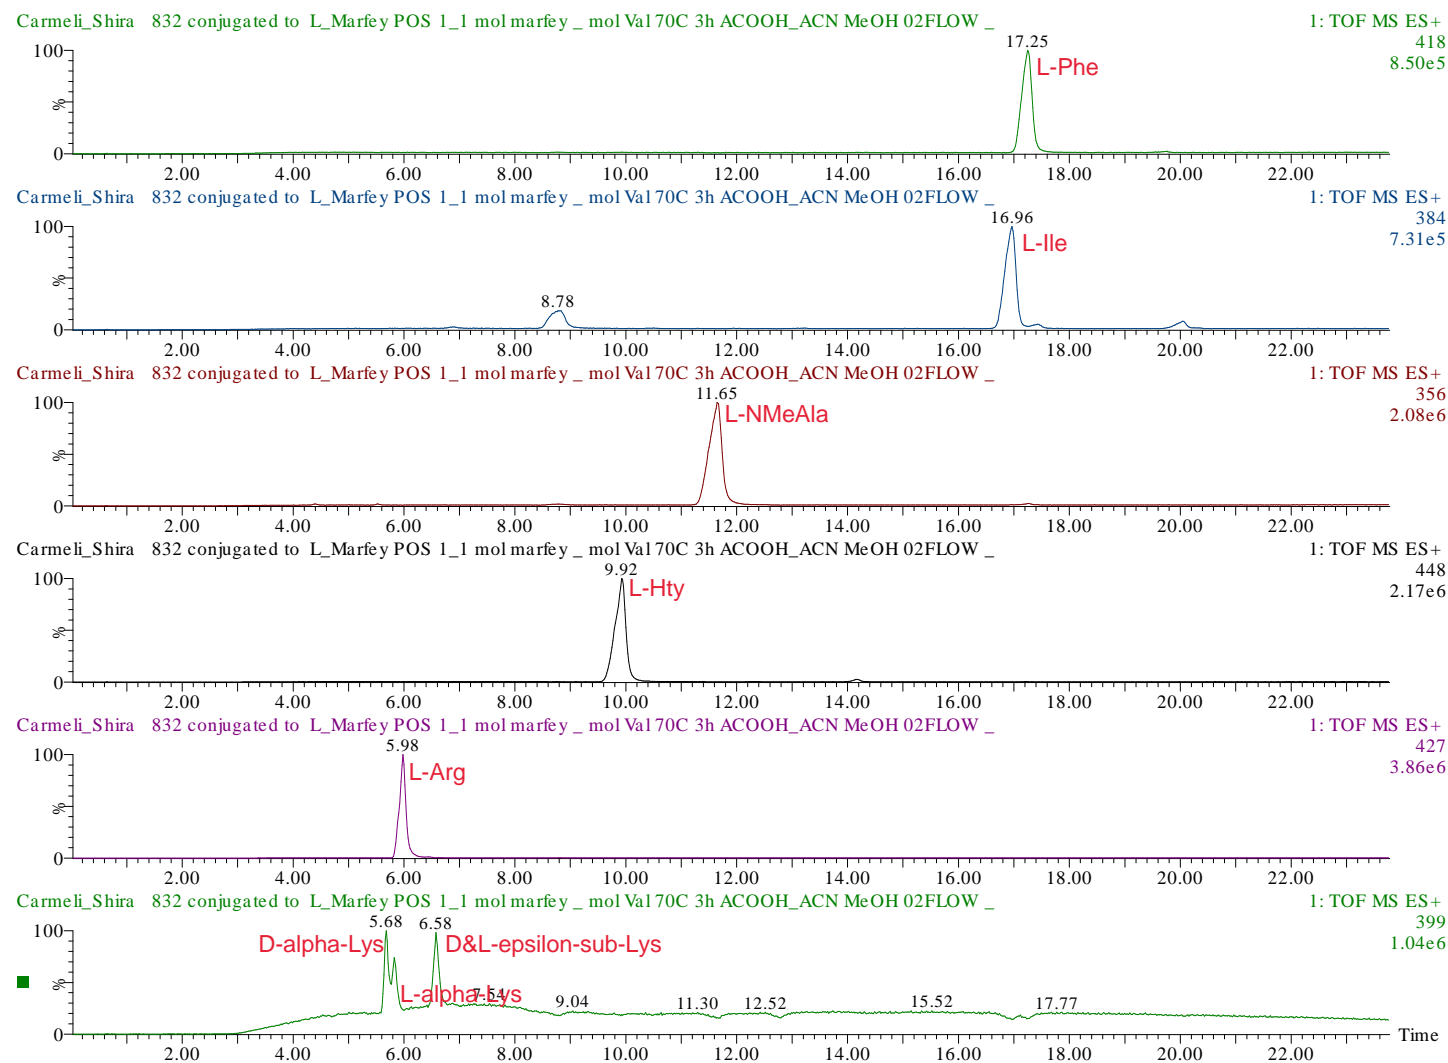

Table S3. NMR Data of Hydanto-anabaenopeptin F (**3**) in DMSO-*d*<sub>6</sub><sup>a</sup>

| Position                         | δ <sub>C</sub> , Mult.                         | δ <sub>H</sub> , Mult.<br>( <i>J</i> in Hz) <sup>b</sup> | HMBC correlations <sup>c</sup> | COSY correlations              | TOCSY correlations              | ROESY correlations   |
|----------------------------------|------------------------------------------------|----------------------------------------------------------|--------------------------------|--------------------------------|---------------------------------|----------------------|
| Arg-1                            | 174.8, C<br>174.7, C                           |                                                          | Arg-2, 2-NH, Lys-2             |                                |                                 |                      |
| Arg-2<br><i>Arg-2</i>            | 56.0, CH                                       | 4.14, dd<br>4.9, 5.80<br>4.18, <i>dd</i><br>(4.9, 5.8)   |                                | Arg-3a, 3b                     |                                 | Arg-2-NH, 3a, 3b     |
| Arg-2-NH<br><i>Arg-2-NH</i>      |                                                | 8.74, s<br>8.75, s                                       |                                |                                |                                 | Arg-2, 4b            |
| Arg-3a<br>Arg-3b<br><i>Arg-3</i> | 28.9, CH <sub>2</sub><br>28.6, CH <sub>2</sub> | 1.74, m<br>1.52, m                                       | Arg-5                          | Arg-2                          | Arg-2, 5                        | Arg-2<br>Arg-2       |
| Arg-4a<br>Arg-4b<br><i>Arg-4</i> | 24.2, CH <sub>2</sub><br>23.9, CH <sub>2</sub> | 1.50, m<br>1.42, m                                       |                                | Arg-6<br>Arg-6                 |                                 |                      |
| Arg-5                            | 40.0, CH <sub>2</sub>                          | 3.05, brdt<br>(4.8, 6.2)                                 |                                | Arg-4a, 4b, 6-NH               | Arg-4a, 4b                      |                      |
| Arg-6-NH                         |                                                | 9.05, brs                                                |                                | Arg-5                          |                                 |                      |
| Arg-7                            | 157.8, C                                       |                                                          |                                |                                |                                 |                      |
| Arg-NH <sub>2</sub> , NH         |                                                | 8.03, brs                                                |                                |                                |                                 |                      |
| CO<br><i>CO</i>                  | 156.9, C<br>156.8, C                           |                                                          | Lys-2, Arg-2-NH                |                                |                                 |                      |
| Lys-1                            | 168.4, C<br>168.3, C                           |                                                          | Ile-2-NH, Lys-2                |                                |                                 |                      |
| Lys-2<br><i>Lys-2</i>            | 56.5, CH<br>56.3, CH                           | 4.32, dd<br>(11.4, 3.8)<br>4.32, <i>dd</i>               | Arg-2-NH                       | Lys-3a, 3b                     |                                 | Lys-4a, 4b           |
| Lys-3a<br><i>Lys-3a</i>          | 29.6, CH <sub>2</sub>                          | 2.39, m<br>1.45, m                                       | Lys- 4b                        | Lys-2, 4a, 4b<br>Lys-2, 4a, 4b | Lys-2, 4a, 4b,<br>Lys-2, 4a, 4b | Ile-2-NH<br>Ile-2-NH |

|                           |                                                |                                      |                             |                                  |                |                                                   |
|---------------------------|------------------------------------------------|--------------------------------------|-----------------------------|----------------------------------|----------------|---------------------------------------------------|
| Lys-3                     | 29.5, CH <sub>2</sub>                          |                                      |                             |                                  |                |                                                   |
| Lys-4a<br>Lys-4b<br>Lys-4 | 23.1, CH <sub>2</sub><br>23.0, CH <sub>2</sub> | 1.45, m<br>1.19, m                   |                             | Lys- 4b<br>Lys- 4a               |                | Lys-2<br>Lys-2                                    |
| Lys-5a<br>Lys-5b<br>Lys-5 | 28.3, CH <sub>2</sub><br>28.2, CH <sub>2</sub> | 1.51, m<br>1.46, m                   |                             |                                  |                | Lys-6a                                            |
| Lys-6a<br>Lys-6b          | 38.6, CH <sub>2</sub>                          | 3.53, m<br>2.66, m                   |                             | Lys-6b, ε-NH<br>Lys-4b, 6a, ε-NH |                | Lys-4a, 6b, ε-NH,<br>Lys-6a, ε-NH                 |
| Lys-ε-NH<br><br>Lys-ε-NH  |                                                | 7.46, t<br>(5.3)<br>7.45, t<br>(5.0) |                             | Lys-6a, 6b                       | Lys-5b, 6a, 6b | NMeAla-2, Phe-2,<br>Lys-5b, 6a, 6b                |
| Ile-1                     | 172.5, C                                       |                                      | Hty-2-NH,<br>Ile-2          |                                  |                |                                                   |
| Ile-2<br><br>Ile-2        | 56.4, CH<br>56.2, CH                           | 4.26, dt<br>(8.0, 6.8)               | Ile-6                       | Ile-2-NH, 3                      |                | Hty-2-NH,<br>Ile-2-NH, 3                          |
| Ile-2-NH<br><br>Ile-2-NH  |                                                | 7.89, d<br>(8.0)<br>7.90, d<br>(8.0) |                             | Ile-2                            | Ile-2, 3, 6    | Ile-2, 3, 6<br>Lys-3a, 4a                         |
| Ile-3                     | 36.7, CH                                       | 1.85, m                              | Ile-2, 4b, 6                | Ile-2, 4a, 4b, 6                 |                | Ile-2                                             |
| Ile-4                     | 25.6, CH <sub>2</sub>                          | 1.53, m<br>1.15, m                   | Ile-6                       | Ile-3, 4b, 6 Ile-3,<br>4a, 6     |                |                                                   |
| Ile-5<br><br>Ile-5        | 11.8, CH <sub>3</sub><br>11.7, CH <sub>3</sub> | 0.89, t<br>(7.4)<br>0.89, t<br>(7.4) | Ile-4a,4b<br><br>Ile-4a, 4b | Ile-4a,4b<br><br>Ile-4a, 4b      |                |                                                   |
| Ile-6<br>Ile-6            | 14.8, CH <sub>3</sub><br>14.8, CH <sub>3</sub> | 0.89, d<br>0.89, d                   | Ile-4a<br>Ile-4a            |                                  |                | Ile-2-NH, Phe-6,6'<br>Ile-2-NH, Phe-5,5',<br>6,6' |

|                                 |                       |                                             |                              |                                            |                             |                                                 |
|---------------------------------|-----------------------|---------------------------------------------|------------------------------|--------------------------------------------|-----------------------------|-------------------------------------------------|
| Hty-1                           | 171.1, C              |                                             | NMeAla-2, NMe,<br>Hty-3a, 3b |                                            |                             |                                                 |
| Hty-2                           | 49.0, CH              | 4.77, brdt<br>(5.3, 6.5)                    | Hty-3b                       | Hty-2-NH, 3a, 3b,                          | Hty-2-NH, 3a, 3b,<br>4a, 4b | Hty-2-NH, 3a, 3b,<br>Phe-2-NH,<br>NMeAla-2      |
| Hty-2-NH<br><i>Hty-2-NH</i>     |                       | 8.98, d<br>(5.3)<br>8.96, <i>d</i><br>(5.3) |                              | Hty-2                                      | Hty-2                       | Hty-2, 3a, 3b, 4a,<br>Ile-2                     |
| Hty-3a<br><br>Hty-3b            | 33.4, CH <sub>2</sub> | 1.85, m<br><br>1.74, m                      |                              | Hty-2, 3b, 4a, 4b<br><br>Hty-2, 3b, 4a, 4b |                             | Ile-2-NH, Hty-2,<br>NH, 6,6'<br>Hty-2, NH, 6,6' |
| Hty-4a<br><br>Hty-4b            | 30.8, CH <sub>2</sub> | 2.62, m<br><br>2.42, m                      | Hty-3b, 6,6'                 | Hty-3a, 3b, 4b<br>Hty-3a, 3b, 4a           |                             | Hty-2-NH, 6,6'<br>Hty-6,6'                      |
| Hty-5                           | 131.0, C              |                                             | Hty-4b, 7,7'                 |                                            |                             |                                                 |
| Hty-6,6'                        | 129.1, CH<br>x2       | 6.98, d x2<br>(8.5)                         | Hty-6',6, 7,7'               | Hty-7,7'                                   |                             | Hty-3a, 3b, 4a, 4b,<br>NMeAla-3                 |
| Hty-7,7'                        | 115.4, CH<br>x2       | 6.66, d x2<br>(8.5)                         | Hty-7',7                     | Hty-6,6'                                   |                             |                                                 |
| Hty-8                           | 155.9, C              |                                             | Hty-6,6', 7,7'               |                                            |                             |                                                 |
| NMeAla-1                        | 170.0, C              |                                             | Phe-2-NH,<br>NMeAla-2, 3     |                                            |                             |                                                 |
| NMeAla-2                        | 54.6, CH              | 4.88, dq<br>(2.6, 7.0)                      | NMeAla-3, NMe                | NMeAla-3                                   |                             | Phe-2-NH, Lys-ε-<br>NH, NMeAla-3,<br>NMe, Hty-2 |
| NMeAla-3                        | 14.1, CH <sub>3</sub> | 1.07, d<br>(7.0)                            | NMeAla-2                     | NMeAla-2                                   |                             | Hty-6,6'                                        |
| NMeAla-NMe<br><i>NMeAla-NMe</i> | 27.3, CH <sub>3</sub> | 1.81, s<br><br>1.81, <i>s</i>               | NMeAla-2                     |                                            |                             | Phe-2-NH, 5,5',<br>6,6'                         |
| Phe-1                           | 171.3, C              |                                             | Lys-ε-NH, Phe-3b             |                                            |                             |                                                 |

|                                           |                       |                                                                                      |               |                      |                  |                                                |
|-------------------------------------------|-----------------------|--------------------------------------------------------------------------------------|---------------|----------------------|------------------|------------------------------------------------|
| Phe-2                                     | 55.2, CH              | 4.35, m                                                                              | Phe-3b        | Phe-2-NH, 3a, 3b     | Phe-2-NH, 3a, 3b | Phe-2-NH, 3a, 5, 5', Lys-ε-NH                  |
| Phe-2-NH<br><i>Phe-2-NH</i>               |                       | 8.65, d<br>(8.6)<br>8.66, <i>d</i><br>(8.6)                                          |               | Phe-2                | Phe-2, 3a, 3b    | NMeAla-2, NMe, Phe-2, 3a, 3b<br>Hty-2          |
| Phe-3a<br><br>Phe-3b<br><br><i>Phe-3b</i> | 37.7, CH <sub>2</sub> | 3.23, dd<br>(2.6, 13.2)<br>2.84, dd<br>(4.8, 13.2)<br>2.81, <i>dd</i><br>(4.8, 13.2) |               | Phe-3b<br><br>Phe-3a |                  | Phe-2, 3b, 5, 5'<br>Phe-2-NH, 3b, 5, 5', 6, 6' |
| Phe-4                                     | 138.5, C              |                                                                                      | Phe-3b, 6, 6' |                      |                  |                                                |
| Phe-5,5'                                  | 129.1, CH<br>x2       | 7.07, d x2<br>(7.2)                                                                  | Phe-5', 5, 7  | Phe-6,6'             |                  | Phe-2, 3a, 3b, NMeAla- NMe, Ile-4a, 6          |
| Phe-6,6'                                  | 128.4, CH<br>x2       | 7.19, dd x2<br>(6.9, 7.2)                                                            | Phe-6',6      | Phe-5',5, 7          |                  | Phe-3b, NMeAla- NMe, Ile-4a, 6                 |
| Phe-7                                     | 126.3, CH             | 7.14, t<br>(6.9)                                                                     | Phe-5',5      | Phe-6,6'             |                  |                                                |

<sup>a</sup>500 MHz for <sup>1</sup>H and 125 MHz for <sup>13</sup>C, ca. 1:1 major rotamer, *minor rotamer*. <sup>b</sup>From HSQC correlations. <sup>c</sup>*J*<sub>C-H</sub>=8 Hz.

Figure S36. LCMS Chromatogram and Mass spectrum of Hydanto-anabaenopeptin F (**3**)

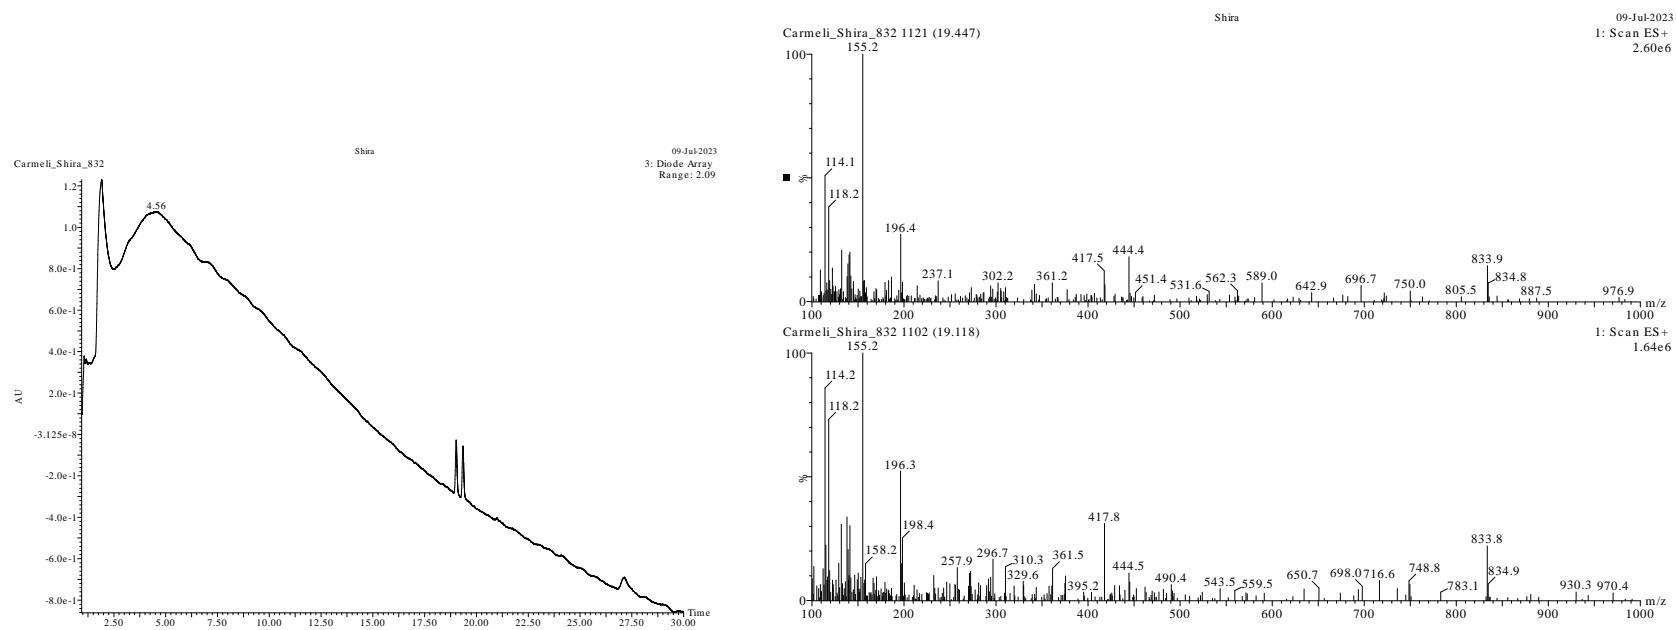



Figure S37.  $^1\text{H}$  NMR Spectrum of Hydanto-oscillamide Y (**4**) in  $\text{DMSO}-d_6$

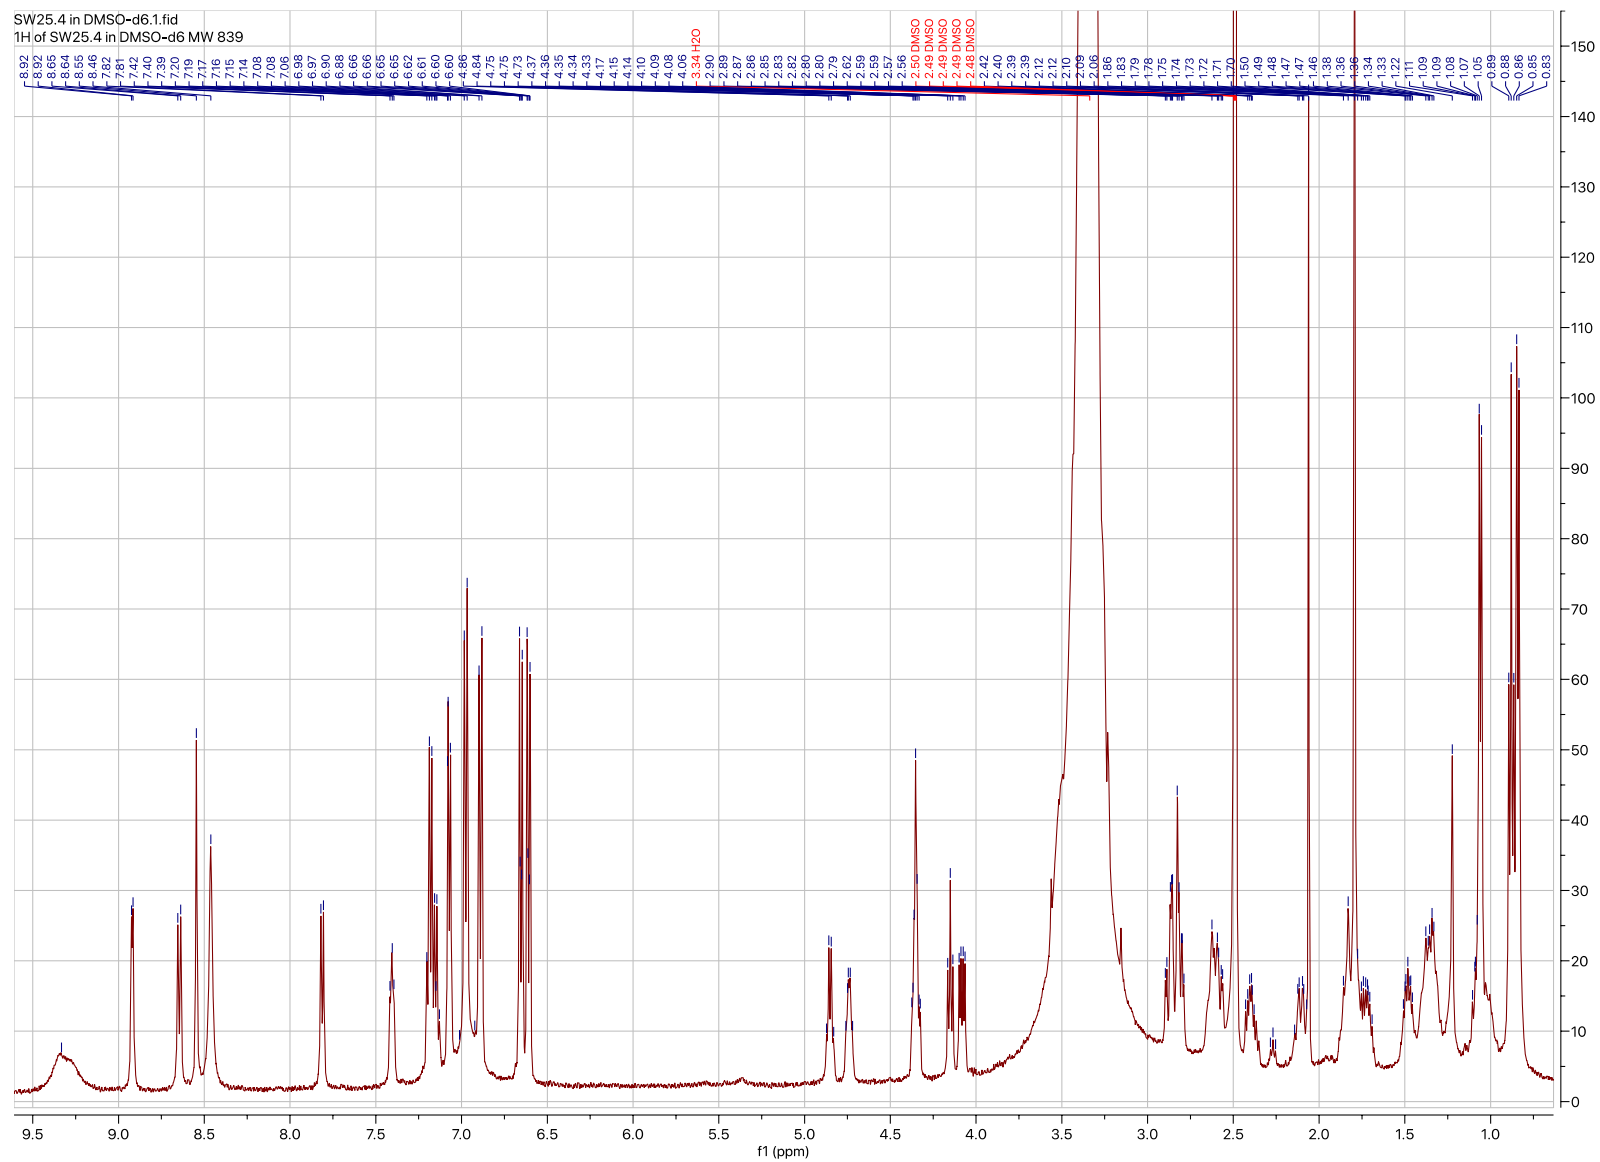

Figure S38.  $^{13}\text{C}$  NMR Spectrum of Hydanto-oscillamide Y (**4**) in  $\text{DMSO}-d_6$

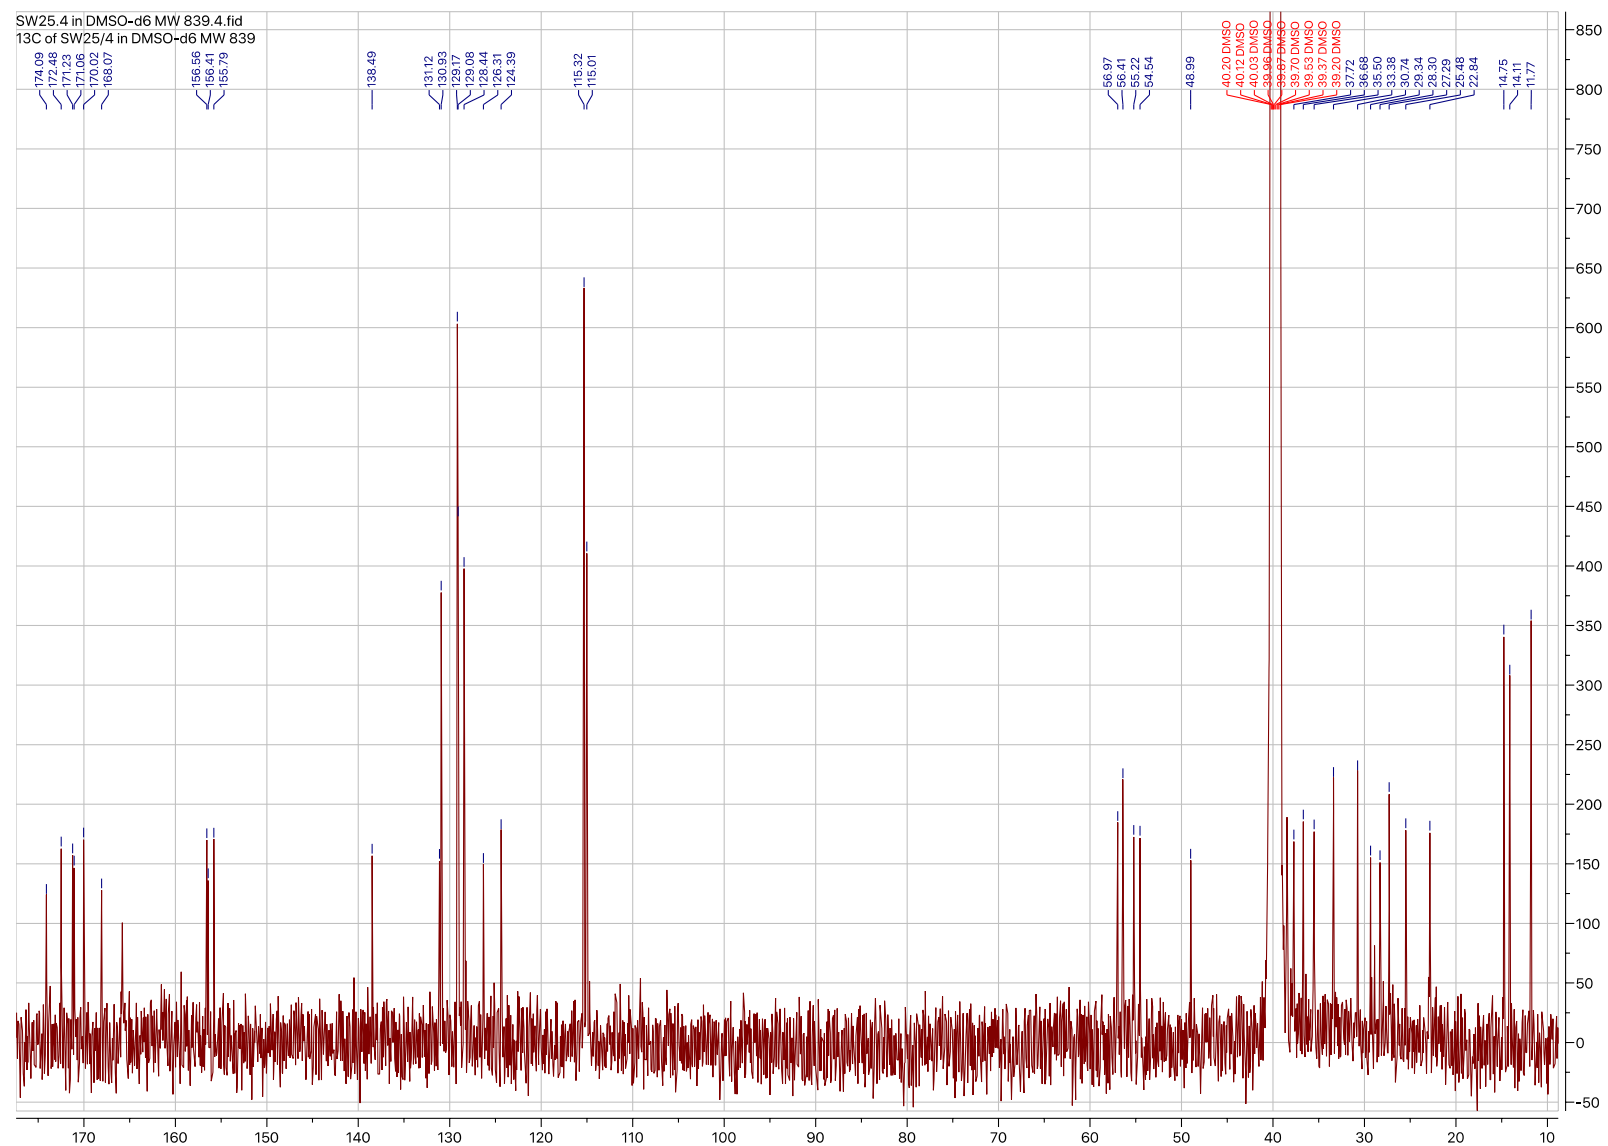

Figure S39. HSQC Spectrum of Hydanto-oscillamide n Y (**4**) in DMSO-*d*<sub>6</sub>

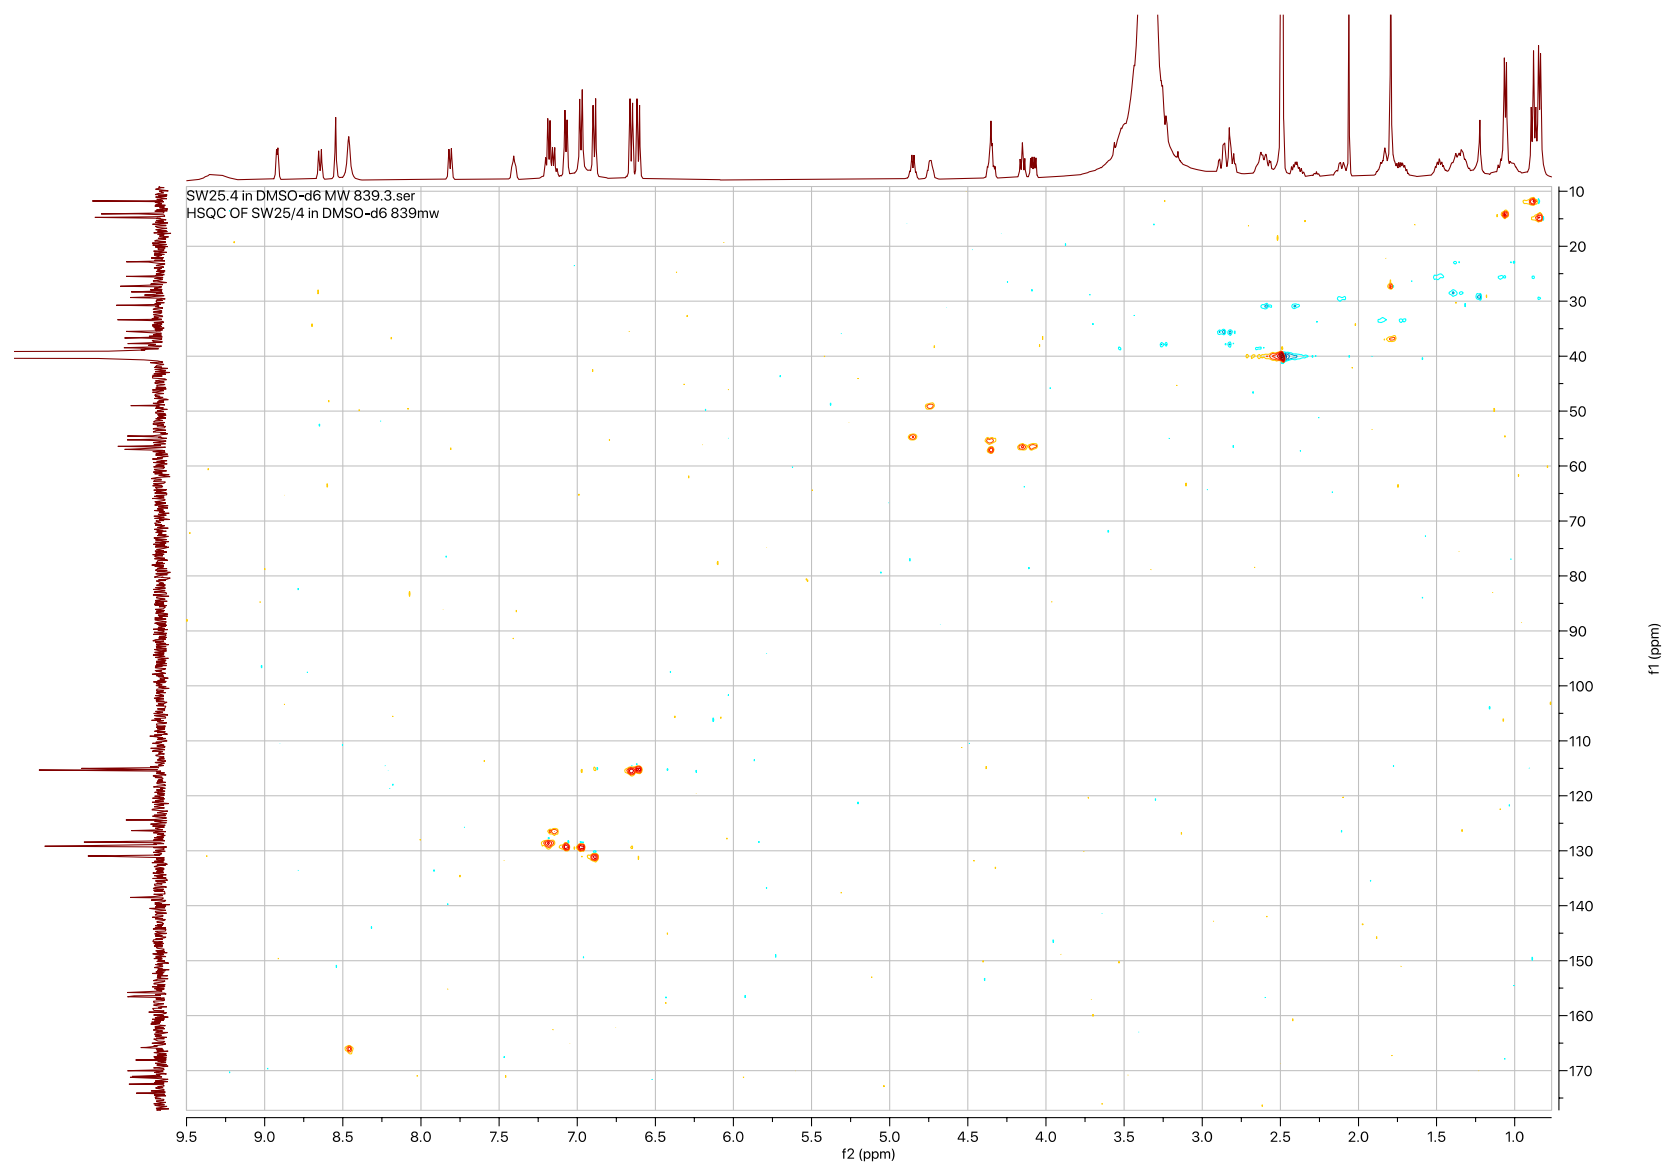

Figure S40. HMBC Spectrum of Hydanto-oscillamide Y (**4**) in DMSO-*d*<sub>6</sub>

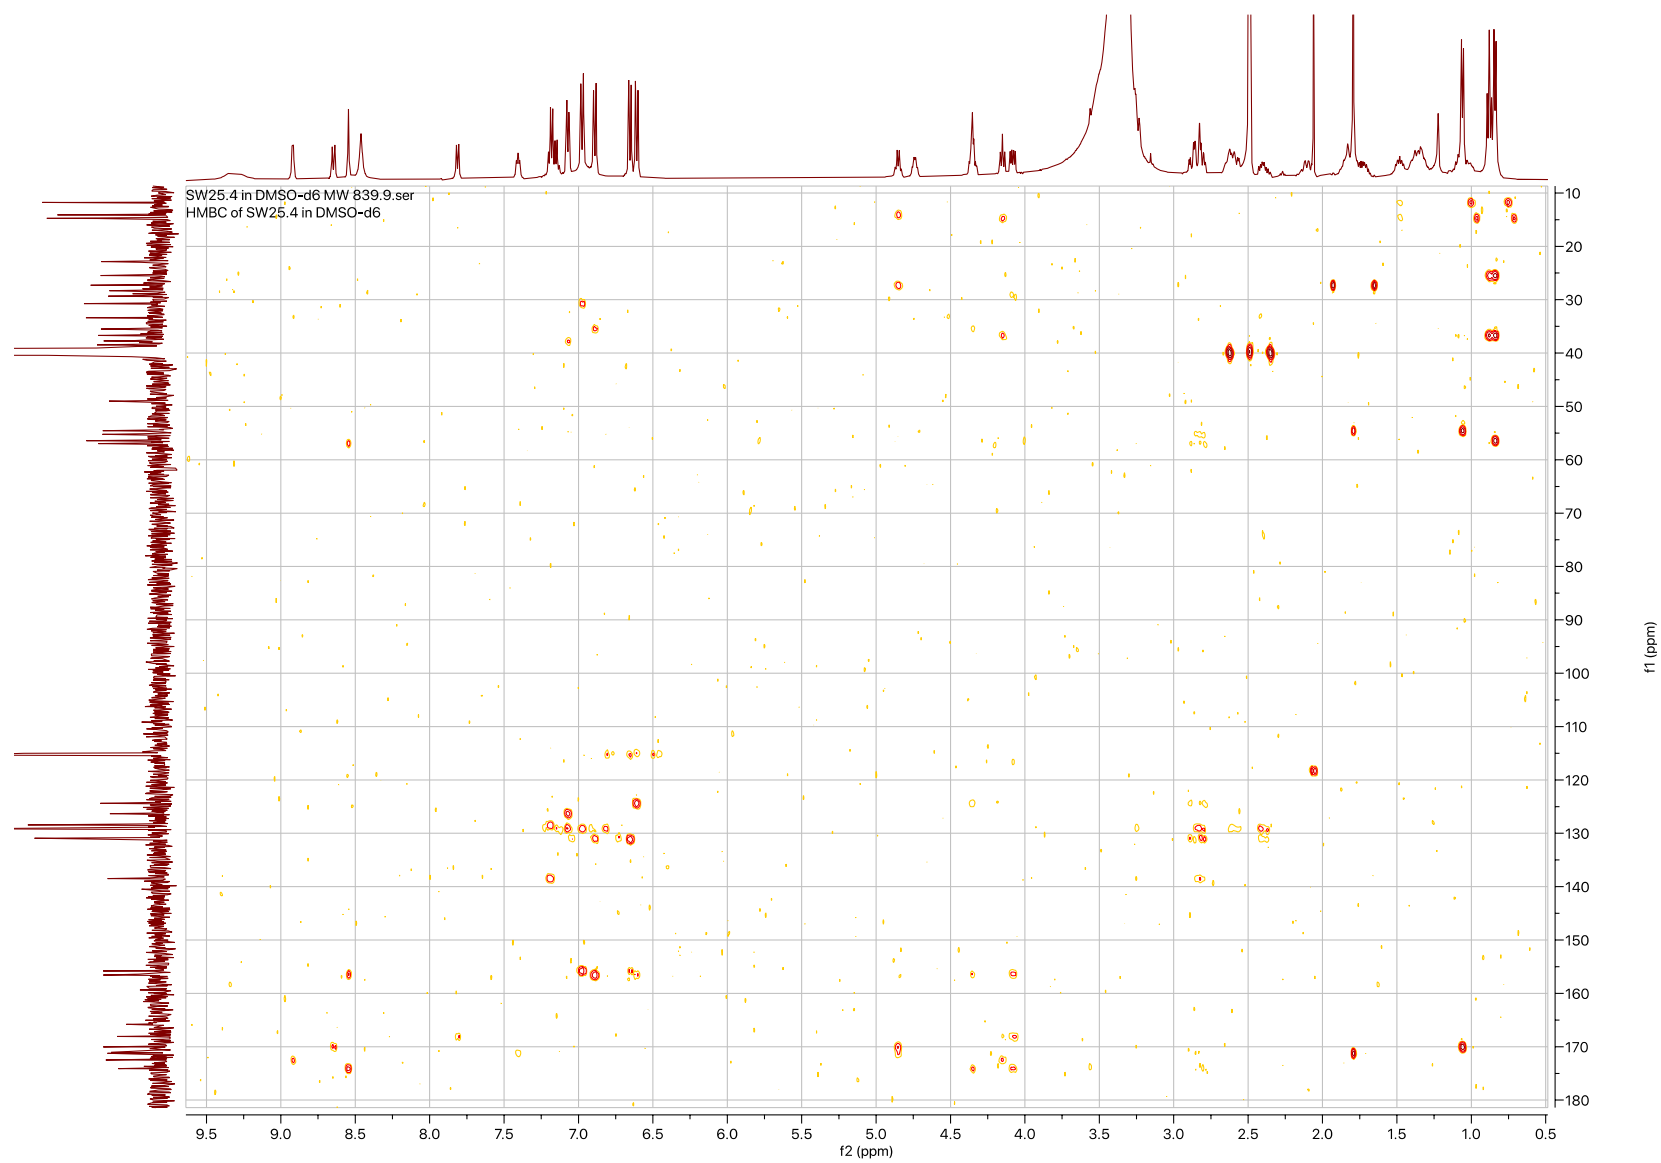

Figure S41. COSY Spectrum of Hydanto-oscillamide Y (**4**) in DMSO- $d_6$

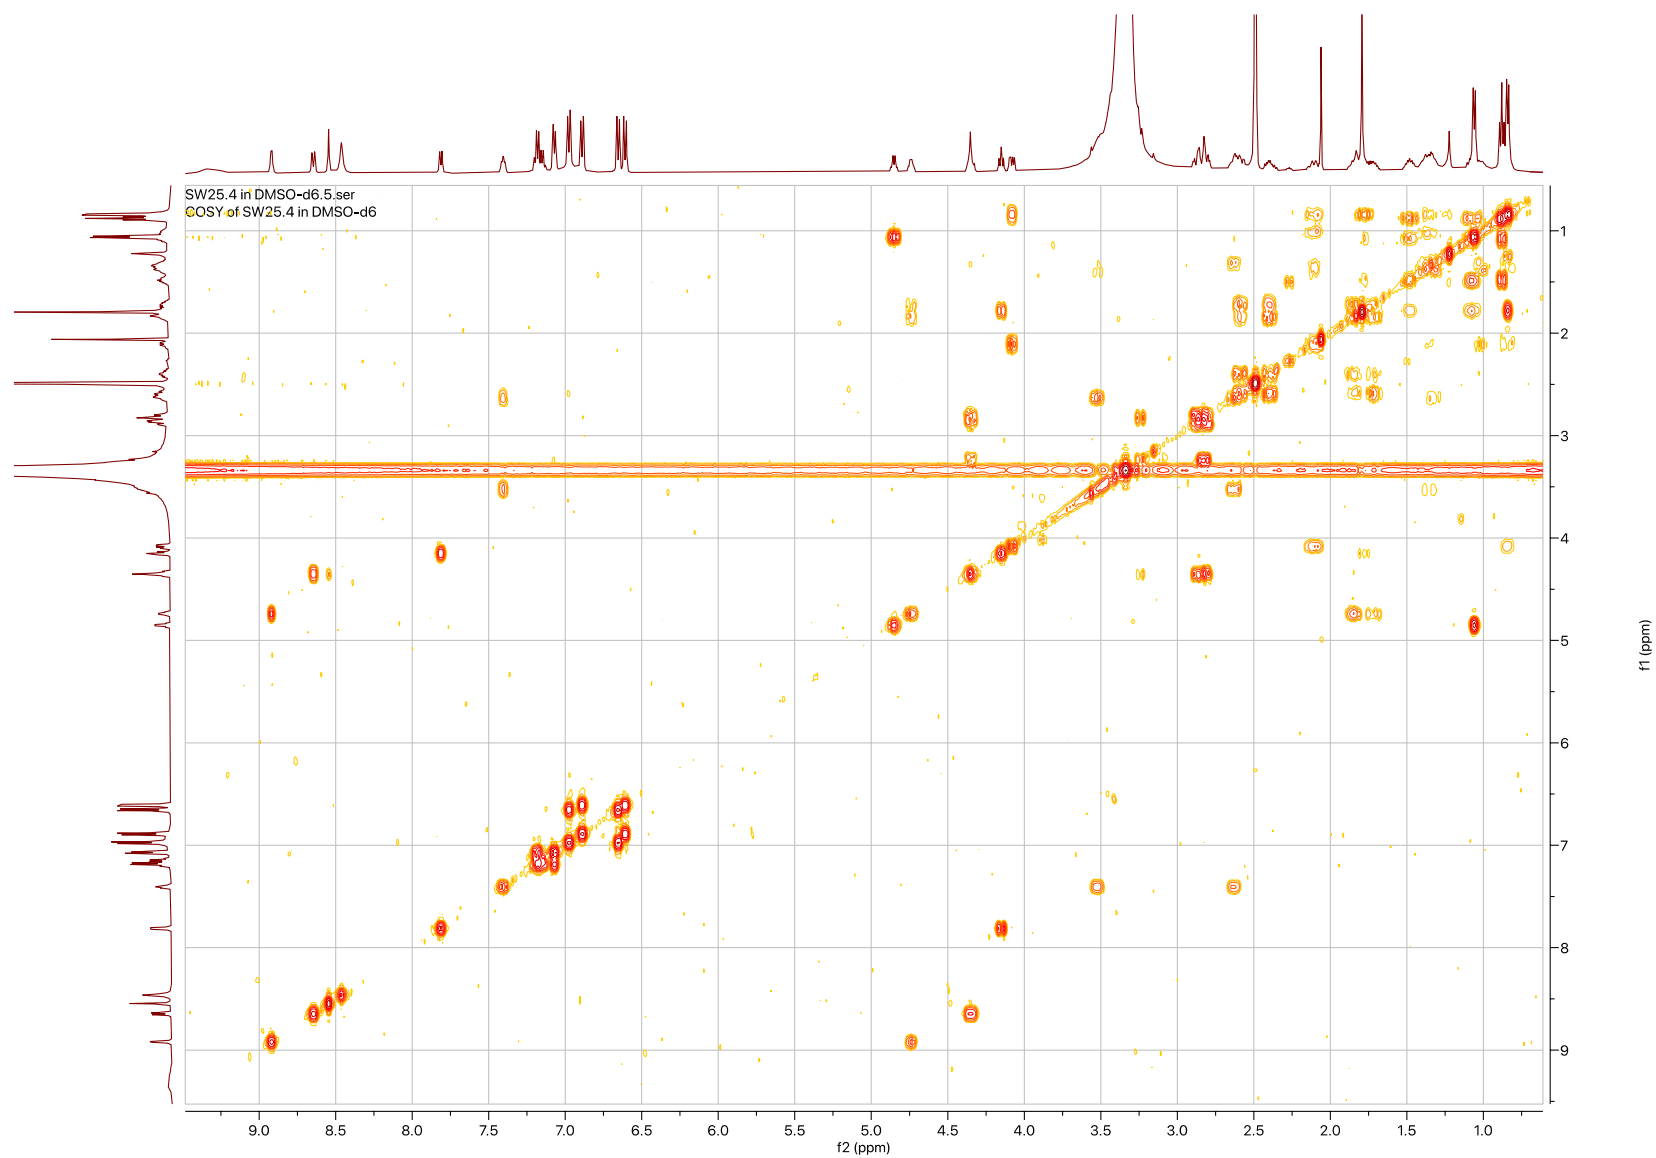

Figure S42. TOCSY Spectrum of Hydanto-oscillamide Y (**4**) in DMSO- $d_6$

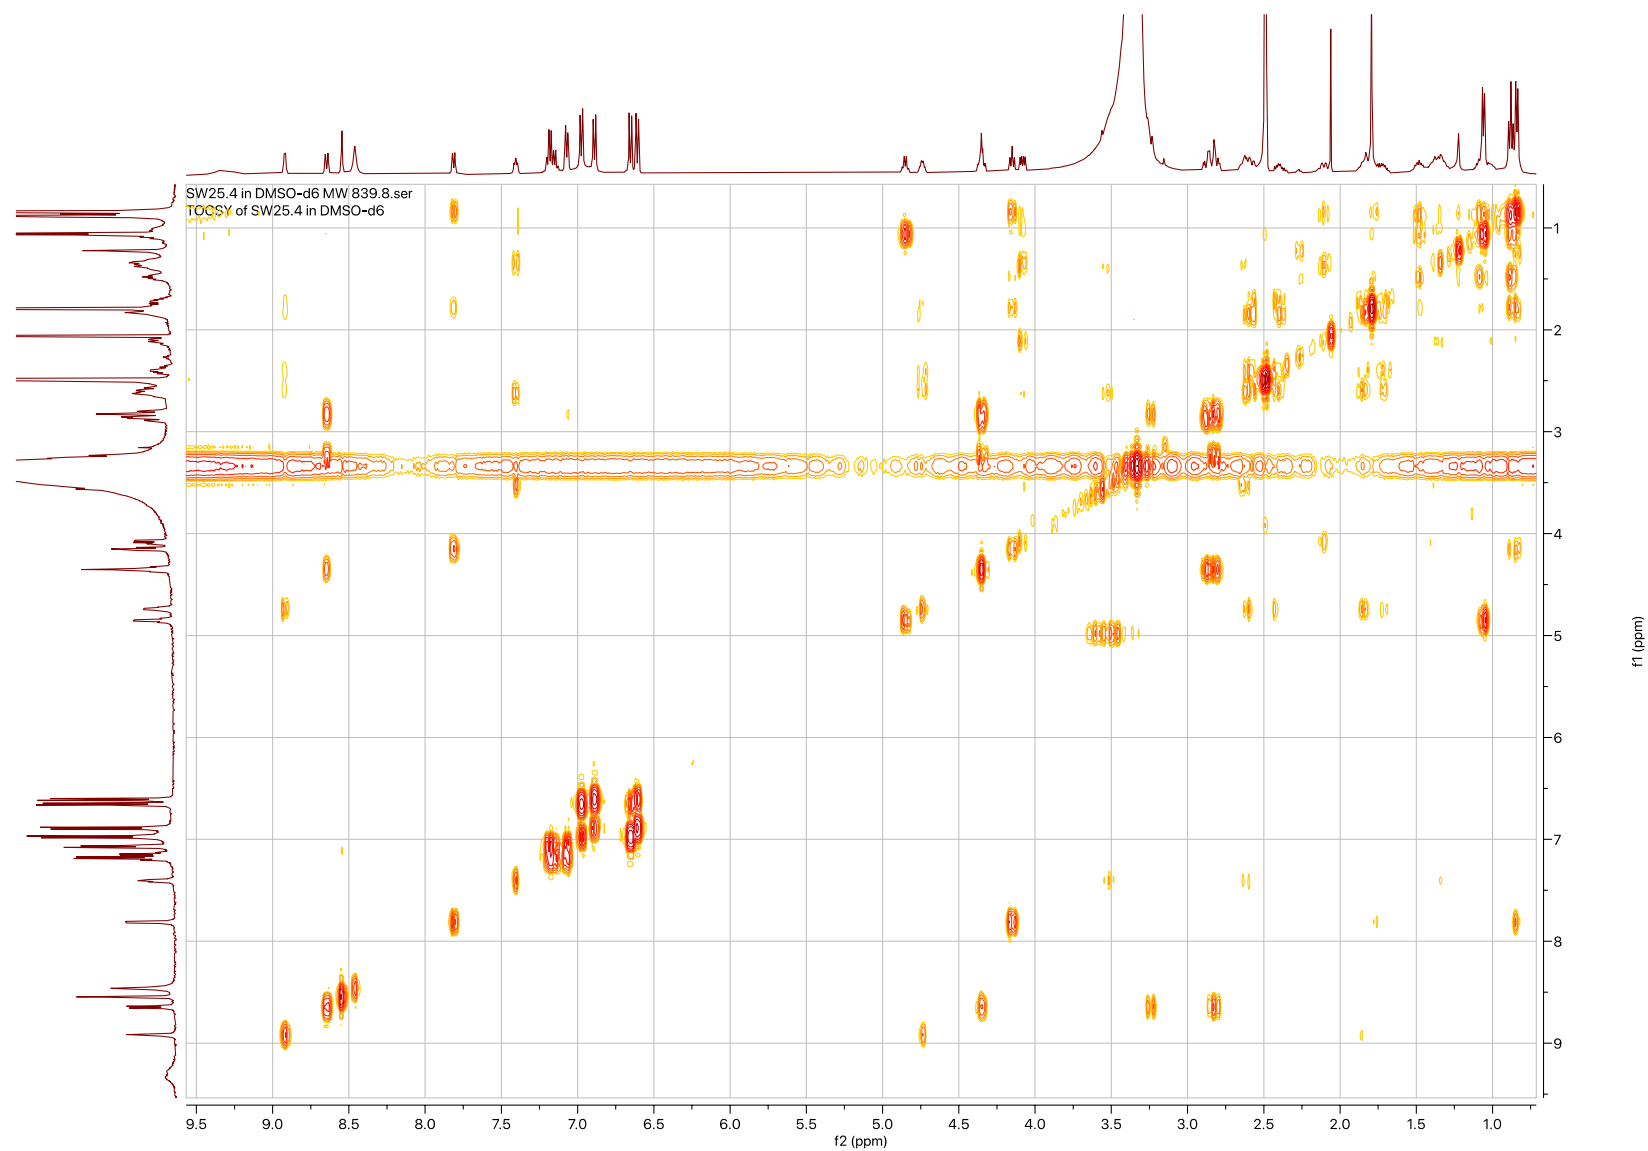

Figure S43. ROESY Spectrum of Hydanto-oscillamide Y (**4**) in DMSO-*d*<sub>6</sub>

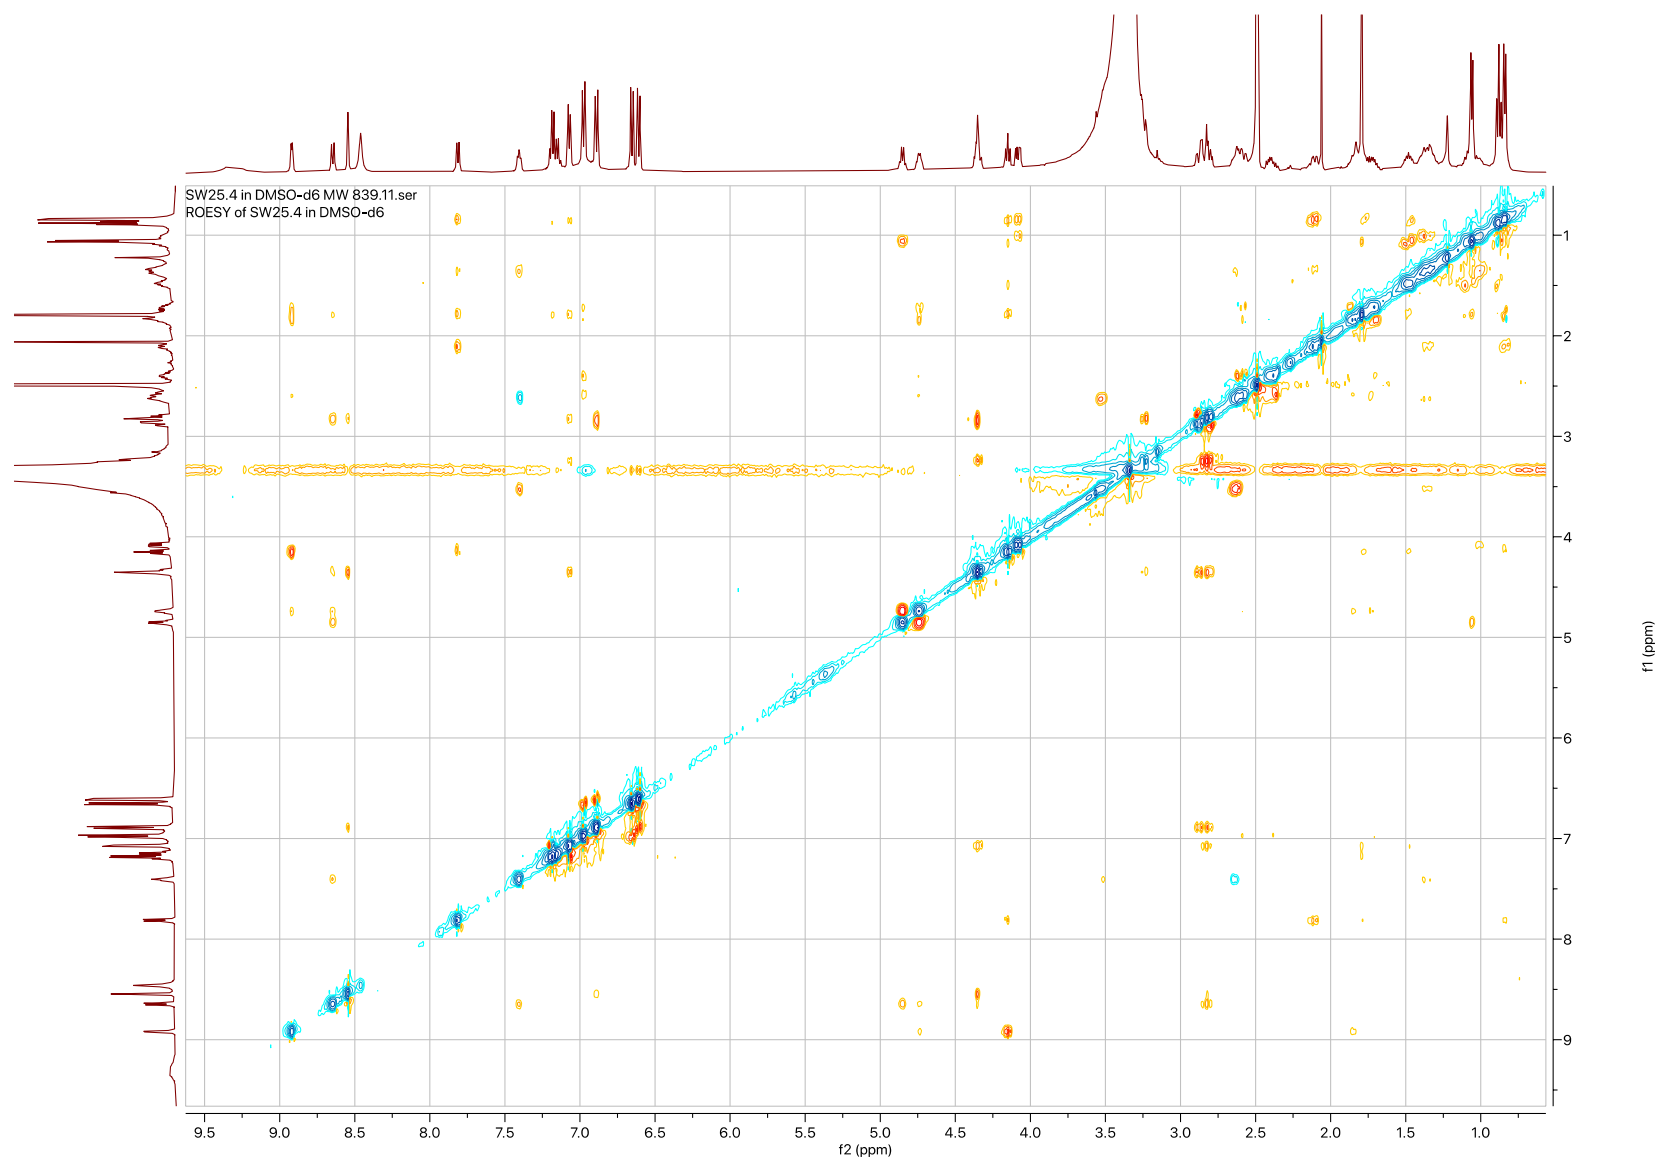

Figure S44. Negative HR ESI MS of Hydanto-oscillamide Y (4)

**Single Mass Analysis**

Tolerance = 3.0 PPM / DBE: min = -1.5, max = 50.0

Element prediction: Off

Number of isotope peaks used for i-FIT = 3

Monoisotopic Mass, Odd and Even Electron Ions

692 formula(e) evaluated with 5 results within limits (all results (up to 1000) for each mass)

Elements Used:

| Mass     | Calc. Mass | mDa  | PPM  | DBE  | Formula        | i-FIT | i-FIT Norm | Fit Conf % | C  | H  | N  | O |
|----------|------------|------|------|------|----------------|-------|------------|------------|----|----|----|---|
| 838.4143 | 838.4140   | 0.3  | 0.4  | 21.5 | C45 H56 N7 O9  | 506.9 | 0.920      | 39.84      | 45 | 56 | 7  | 9 |
|          | 838.4139   | 0.4  | 0.5  | 27.0 | C44 H50 N14 O4 | 507.7 | 1.736      | 17.61      | 44 | 50 | 14 | 4 |
|          | 838.4153   | -1.0 | -1.2 | 26.5 | C46 H52 N11 O5 | 508.5 | 2.580      | 7.58       | 46 | 52 | 11 | 5 |
|          | 838.4126   | 1.7  | 2.0  | 22.0 | C43 H54 N10 O8 | 507.0 | 1.063      | 34.53      | 43 | 54 | 10 | 8 |
|          | 838.4166   | -2.3 | -2.7 | 26.0 | C48 H54 N8 O6  | 511.4 | 5.426      | 0.44       | 48 | 54 | 8  | 6 |

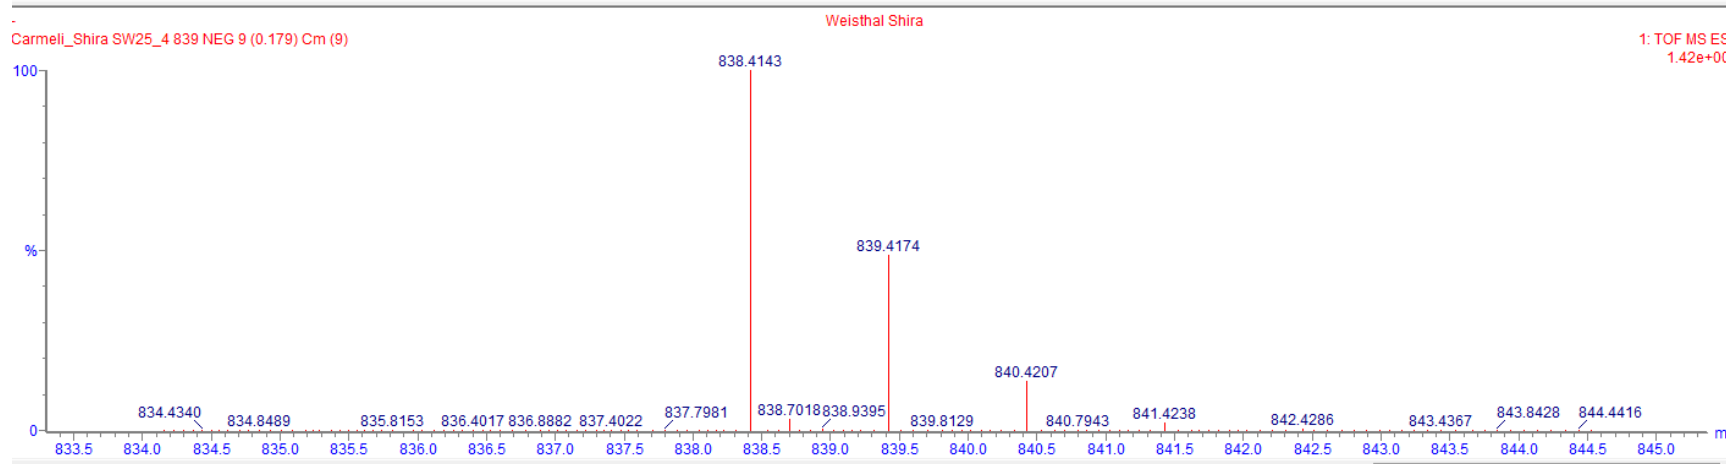



Figure S45. Positive HR ESI MS/MS Spectrum of Hydanto-oscillamide Y (4)

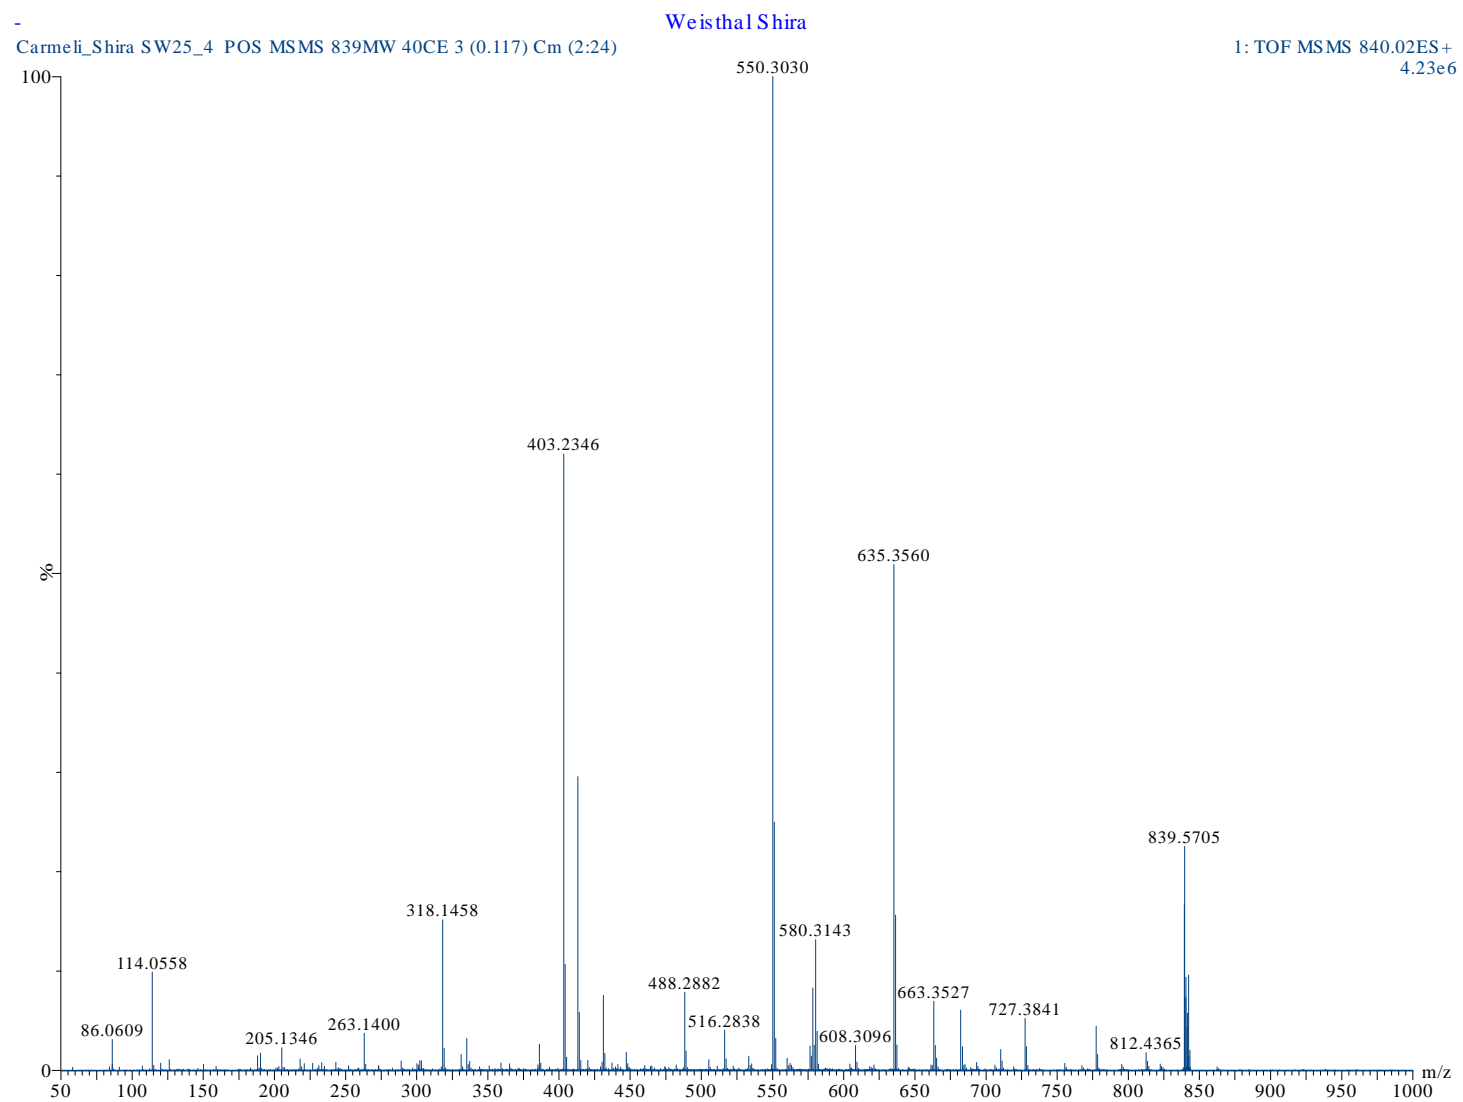

Figure S46. Scheme of Fragmentation in the Positive HR ESI MS/MS Spectrum of Hydanto-oscillamide Y (4)

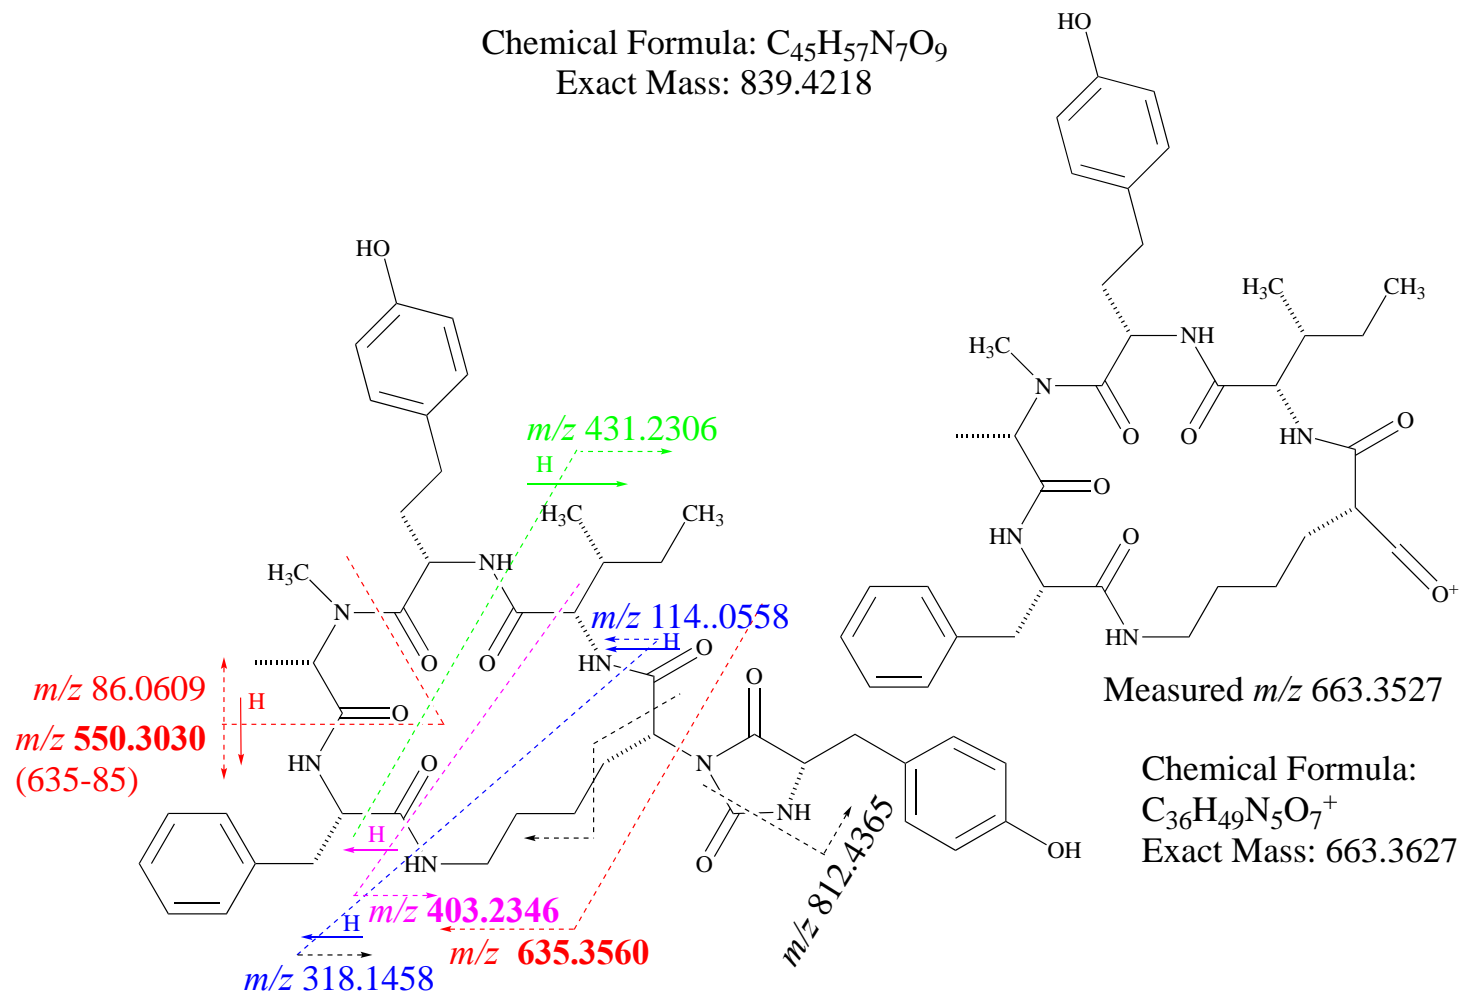

Figure S47. LCMS Traces of Marfey's Method Amino Acids Analysis of Hydanto-oscillamide Y (4)

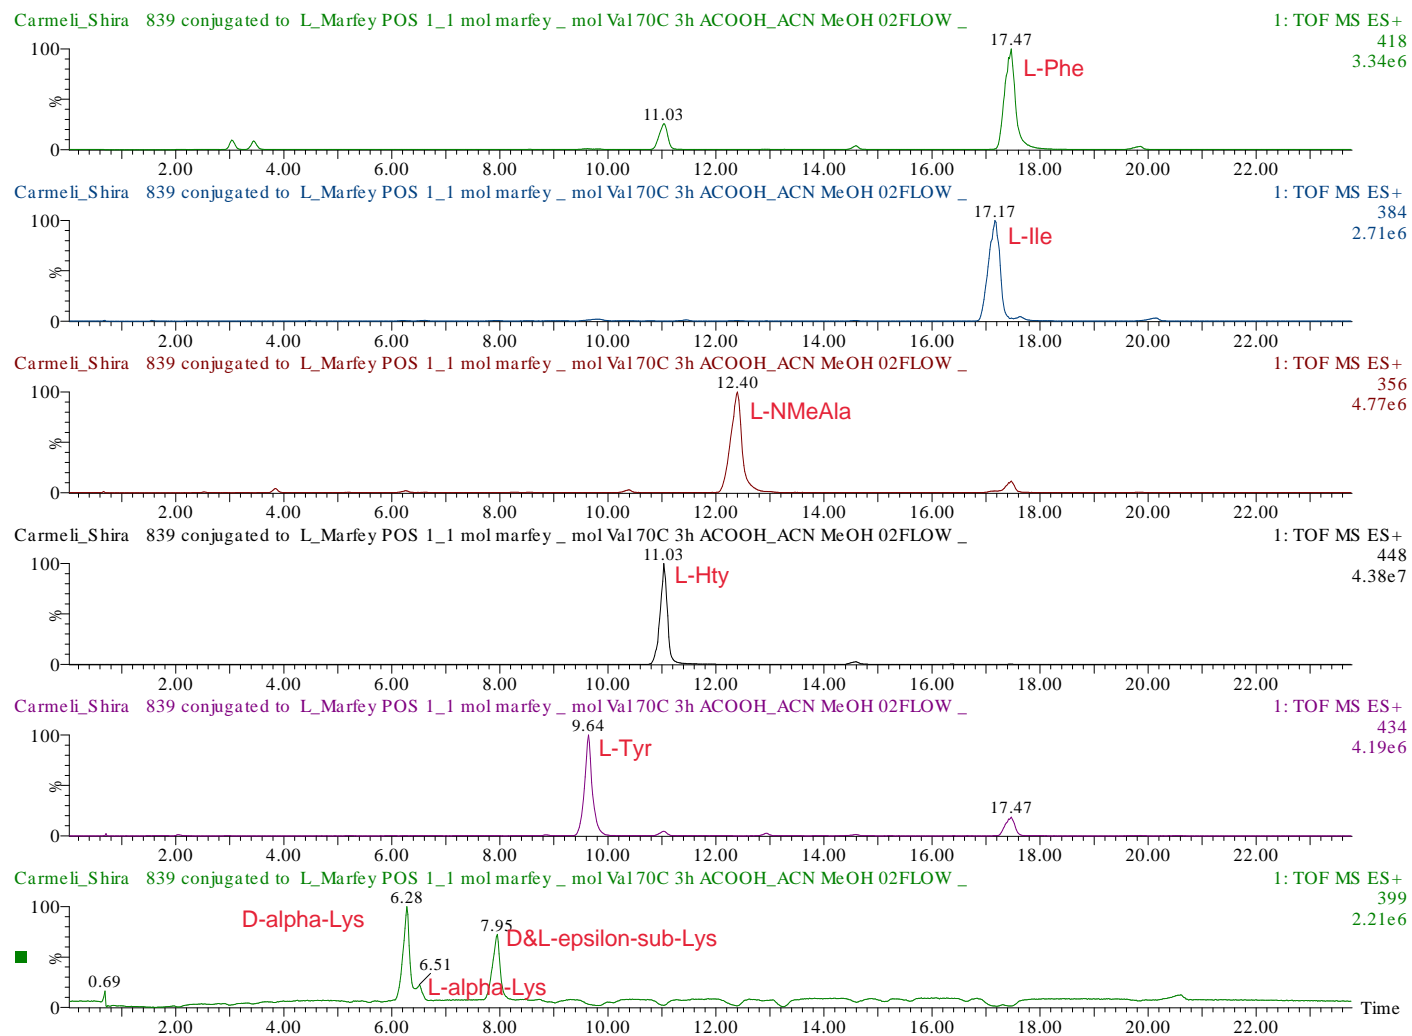

Table S4. NMR Data of Hydanto-oscillamide Y (**4**) in DMSO-*d*<sub>6</sub><sup>a</sup>

| Position  | $\delta_C$ , Mult.    | $\delta_H$ , Mult. ( <i>J</i> in Hz) <sup>b</sup> | HMBC correlations <sup>c</sup> | COSY correlations                     | TOCSY correlations                  | ROESY correlations                |
|-----------|-----------------------|---------------------------------------------------|--------------------------------|---------------------------------------|-------------------------------------|-----------------------------------|
| Tyr-1     | 174.1, C              |                                                   | Tyr-2,2-NH, 3b, Lys-2          |                                       |                                     |                                   |
| Tyr-2     | 57.0, CH              | 4.35, brt (4.5)                                   | Tyr-2-NH,3a,3b                 | Tyr-2-NH,3a,3b                        | Tyr-2-NH,3a,3b                      | Tyr-2-NH,3a,3b                    |
| Tyr-2-NH  |                       | 8.55, s                                           |                                | Tyr-2                                 | Tyr-2,3a, 3b                        | Tyr-2,3b, 5,5'                    |
| Tyr-3a    | 35.5, CH <sub>2</sub> | 2.88, dd (14.4, 4.1)                              | 6.89, 4.35                     | 4.35, 2.82                            | Tyr-2,3b                            | Tyr-2                             |
| Tyr-3b    |                       | 2.82, m                                           |                                | 4.35, 2.88                            | Tyr-2,3a                            | Tyr-2,2-NH                        |
| Tyr-4     | 124.4, C              |                                                   | Tyr-2,3a, 3b,6,6'              |                                       |                                     |                                   |
| Tyr-5,5'  | 130.9, CH             | 6.89, d x2 (8.2)                                  | Tyr-3a,3b, 5',5                | Tyr-6,6'                              |                                     | Tyr-2-NH, 6,6'                    |
| Tyr-6,6'  | 115.0, CH             | 6.61, d x2 (8.2)                                  | Tyr-6',6                       | Tyr-5,5'                              |                                     | Tyr-5,5'                          |
| Tyr-7     | 156.6, C              |                                                   | Tyr-5,5', 6,6'                 |                                       |                                     |                                   |
| Tyr-7-OH* |                       | 9.33, brs                                         |                                |                                       |                                     |                                   |
| CO        | 156.4, C              |                                                   | Tyr-2,2-NH, Lys-2              |                                       |                                     |                                   |
| Lys-1     | 168.1, C              |                                                   | Ile-2,2-NH, Lys-2              |                                       |                                     |                                   |
| Lys-2     | 56.4, CH              | 4.08, dd (11.6, 5.2)                              |                                | Lys-3a, 3b                            | Lys-3a, 5a, 5b                      | Ile-2-NH                          |
| Lys-3     | 29.3, CH <sub>2</sub> | 2.10, brq (11.6)<br>0.86, m                       | Lys-2                          | Lys-2, 3b, 4a, 4b<br>Lys-2, 3a        | Lys-2, 3b, 4a, 4b<br>Lys-2, 3a      | Ile-2-NH                          |
| Lys-4     | 22.8, CH <sub>2</sub> | 1.36, m<br><br>1.00, m                            |                                | Lys-3a, 3b, 4b<br>Lys-3a, 3b, 4a      |                                     |                                   |
| Lys-5     | 28.3, CH <sub>2</sub> | 1.39, m<br>1.34, m                                |                                | Lys-6a<br>Lys-6a, 6b                  |                                     | Lys-6-NH<br>Lys-6-NH              |
| Lys-6     | 38.5, CH <sub>2</sub> | 3.53, m<br><br>2.63, m                            |                                | Lys-4a, 4b, 6b, 6-NH<br>Lys-4a,4b, 6a | Lys-5a, 6b, 6-NH<br>Lys-5a,6a, 6-NH | Lys-6-NH<br><br>Lys-6-NH          |
| Lys-6-NH  |                       | 7.41, dd (6.4,5.2)                                |                                | Lys-6a,6b                             | Lys-3a, 3b, 6a, 6b                  | Lys-5a, 5b, 6a,6b(-), Phe-2, 2-NH |
| Ile-1     | 172.5, C              |                                                   | Hty-2-NH, Ile-2                |                                       |                                     |                                   |

|           |                       |                                                          |                         |                                    |                                          |                                  |
|-----------|-----------------------|----------------------------------------------------------|-------------------------|------------------------------------|------------------------------------------|----------------------------------|
| Ile-2     | 56.4, CH              | 4.15, t (7.4)                                            | Ile-6                   | Hty-2-NH, 3                        | Hty-2-NH, 3, 4a, 5, 6                    | Ile-2-NH, Hty-2-NH               |
| Ile-2-NH  |                       | 7.82, d (7.4)                                            |                         | Hty-2                              | Hty-2, 3, 4b, 6                          | Lys-2, 3a, Ile-2, 3, 6           |
| Ile-3     | 36.7, CH              | 1.79, m                                                  | Ile-2                   | Ile-2, 4a, 4b, 6                   | Ile-2, 4a, 4b, 5, 6                      | Ile-2-NH                         |
| Ile-4     | 25.5, CH <sub>2</sub> | 1.48, ddd (12.8,7.2, 4.4)<br>1.08, m                     | Ile-5,6                 | Ile-3, 4b, 5<br>Ile-3, 4b, 5       | Ile-2, 3, 4b, 5, 6<br>Ile-2, 3, 4a, 5, 6 | Phe-5,5'                         |
| Ile-5     | 11.8, CH <sub>3</sub> | 0.88, t (7.4)                                            | Ile-4a                  | Ile-4a,4b                          |                                          |                                  |
| Ile-6     | 14.8, CH <sub>3</sub> | 0.84, d (6.7)                                            | Ile-2,4a                | Ile-3                              |                                          | Ile-2-NH                         |
| Hty-1     | 171.1, C              |                                                          | NMe-Ala-2, NMe, Hty-3b  |                                    |                                          |                                  |
| Hty-2     | 49.0, CH              | 4.74, brdt (5.0,6.5)                                     |                         | Hty-3a,3b                          | Hty-3a,3b, 4a,4b                         | Hty-2-NH, NMe-Ala-2              |
| Hty-2-NH  |                       | 8.92, d (4.3)                                            |                         | Hty-2                              | Hty-2,3a, 3b,4a,4b                       | Ile-2, Phe-2-NH, Hty-2,3a,3b     |
| Hty-3     | 33.4, CH <sub>2</sub> | 1.85, m<br>1.72, m                                       | Hty-2                   | Hty-2,3b, 4a,4b<br>Hty-2,3a, 4a,4b | Hty-2,3b, 4a,4b<br>Hty-2,3a, 4a,4b       | Hty-2-NH, 6,6'<br>Hty-2-NH, 6,6' |
| Hty-4     | 30.7, CH <sub>2</sub> | 2.59, ddd (13.8,12.0, 4.2)<br>2.40, ddd (13.8,11.5, 6.3) | Hty-6,6'                | Hty-3a,3b, 4b<br>Hty-3a,3b, 4a     | Hty-2,3a, 3b,4b<br>Hty-2,3a, 3b,4a       | Hty-6,6'<br>Hty-6,6'             |
| Hty-5     | 131.1, C              |                                                          | Hty-4b,7,7'             |                                    |                                          |                                  |
| Hty-6,6'  | 129.2, CH             | 6.97, d x2 (8.5)                                         | Hty-4a,4b, 6',6         |                                    |                                          | Hty-3a,3b, 4a,4b,7,7'            |
| Hty-7,7'  | 115.3, CH             | 6.65, d x2 (8.5)                                         | Hty-7',7                |                                    |                                          | Hty-6,6'                         |
| Hty-8     | 155.8, C              |                                                          | Hty-6,6', 7,7'          |                                    |                                          |                                  |
| OH*       |                       | 9.27, brs                                                |                         |                                    |                                          |                                  |
| NMe-Ala-1 | 170.0, C              |                                                          | Phe-2,2-NH, NMe-Ala-2,3 |                                    |                                          |                                  |
| NMe-Ala-2 | 54.5, CH              | 4.85, q (6.6)                                            | NMe-Ala-3, NMe          | NMe-Ala-3                          | NMe-Ala-3                                | Hty-2, Phe-2-NH                  |
| NMe-Ala-3 | 14.1, CH <sub>3</sub> | 1.06, d (6.6)                                            | NMe-Ala-2               | NMe-Ala-2                          | NMe-Ala-3                                |                                  |

|             |                       |                                |                   |                      |                      |                                     |
|-------------|-----------------------|--------------------------------|-------------------|----------------------|----------------------|-------------------------------------|
| NMe-Ala-NMe | 27.3, CH <sub>3</sub> | 1.79, s                        | NMe-Ala-2         |                      |                      | Phe-2-NH, 5,5'                      |
| Phe-1       | 171.2, C              |                                | Lys-6-NH, Phe-3   |                      |                      |                                     |
| Phe-2       | 55.2, CH              | 4.35, m                        | Phe-3             | Phe-2-NH, 3a,3b      | Phe-2-NH, 3a,3b      | Phe-2-NH, 3a,3b, Lys-6-NH           |
| Phe-2-NH    |                       | 8.65, d (8.5)                  |                   | Phe-2                | Phe-2,3a, 3b         | Lys-6-NH, NMe-Ala-2, NMe, Phe-2,3b  |
| Phe-3       | 37.7, CH <sub>2</sub> | 3.24, dd (13.8,3.2)<br>2.82, m | Phe-5,5'          | Phe-2,3b<br>Phe-2,3a | Phe-2,3b<br>Phe-2,3a | Phe-2,5,5'<br>Phe-2, NH, 5,5'       |
| Phe-4       | 138.5, C              |                                | Phe-3a,3b<br>6,6' |                      |                      |                                     |
| Phe-5,5'    | 129.1, CH             | 7.07, d x2 (7.0)               | Phe-3a,3b, 5',5   |                      |                      | Phe-3a,3b, 6,6', NMe-Ala-NMe, Ile-4 |
| Phe-6,6'    | 128.4, CH             | 7.19, t x2 (7.0)               | Phe-6',6          |                      |                      | Phe-5,5'                            |
| Phe-7       | 126.3, CH             | 7.16, t (7.0)                  | Phe-5,5'          |                      |                      |                                     |

<sup>a</sup>500 MHz for <sup>1</sup>H and 125 MHz for <sup>13</sup>C. <sup>b</sup>From HSQC correlations. <sup>c</sup>*J*<sub>C-H</sub>=8 Hz. \*May interchange.

Figure S48. LCMS Chromatogram and Mass spectrum of Hydanto-oscillamide Y (4)

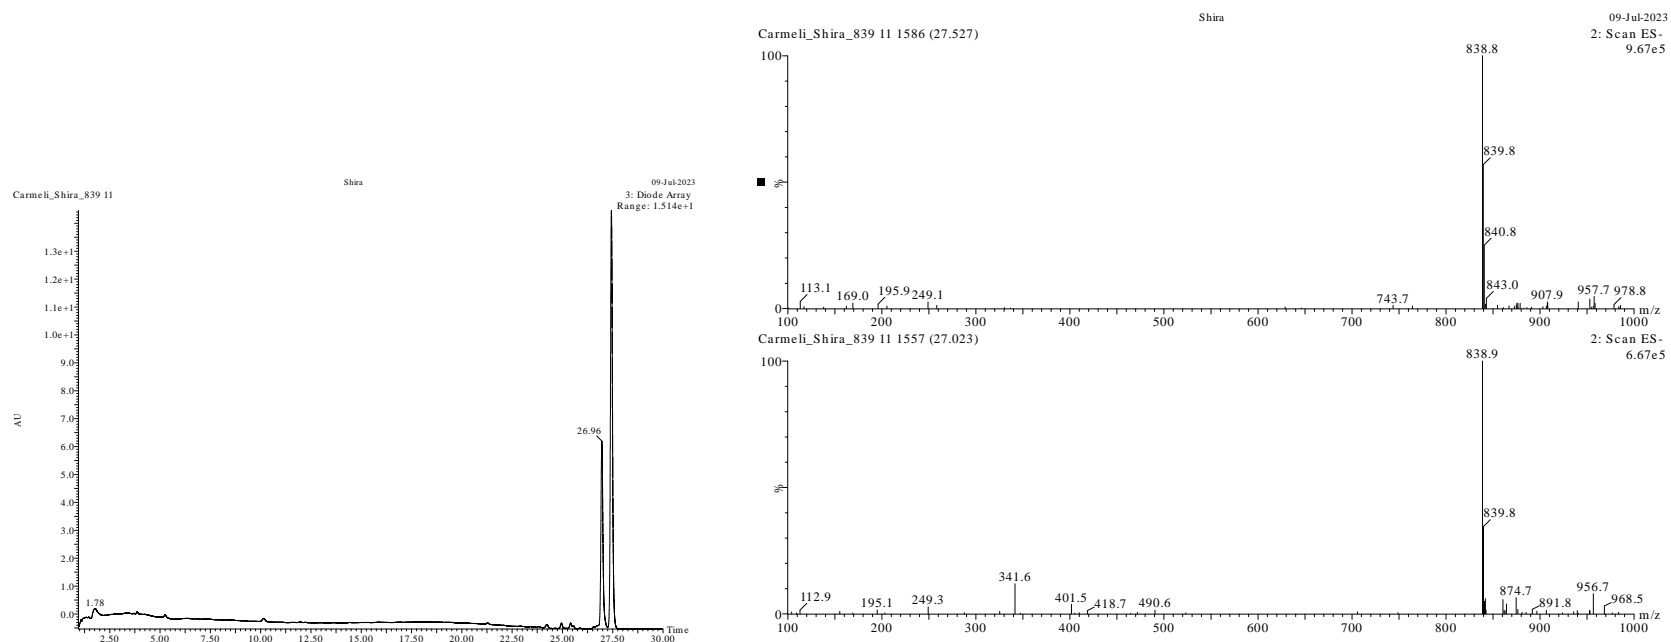

Figure S49.  $^1\text{H}$  NMR Spectrum of  $^1[\text{Dht}]\text{-Anabaenopeptin A (5)}$  in  $\text{DMSO-}d_6$

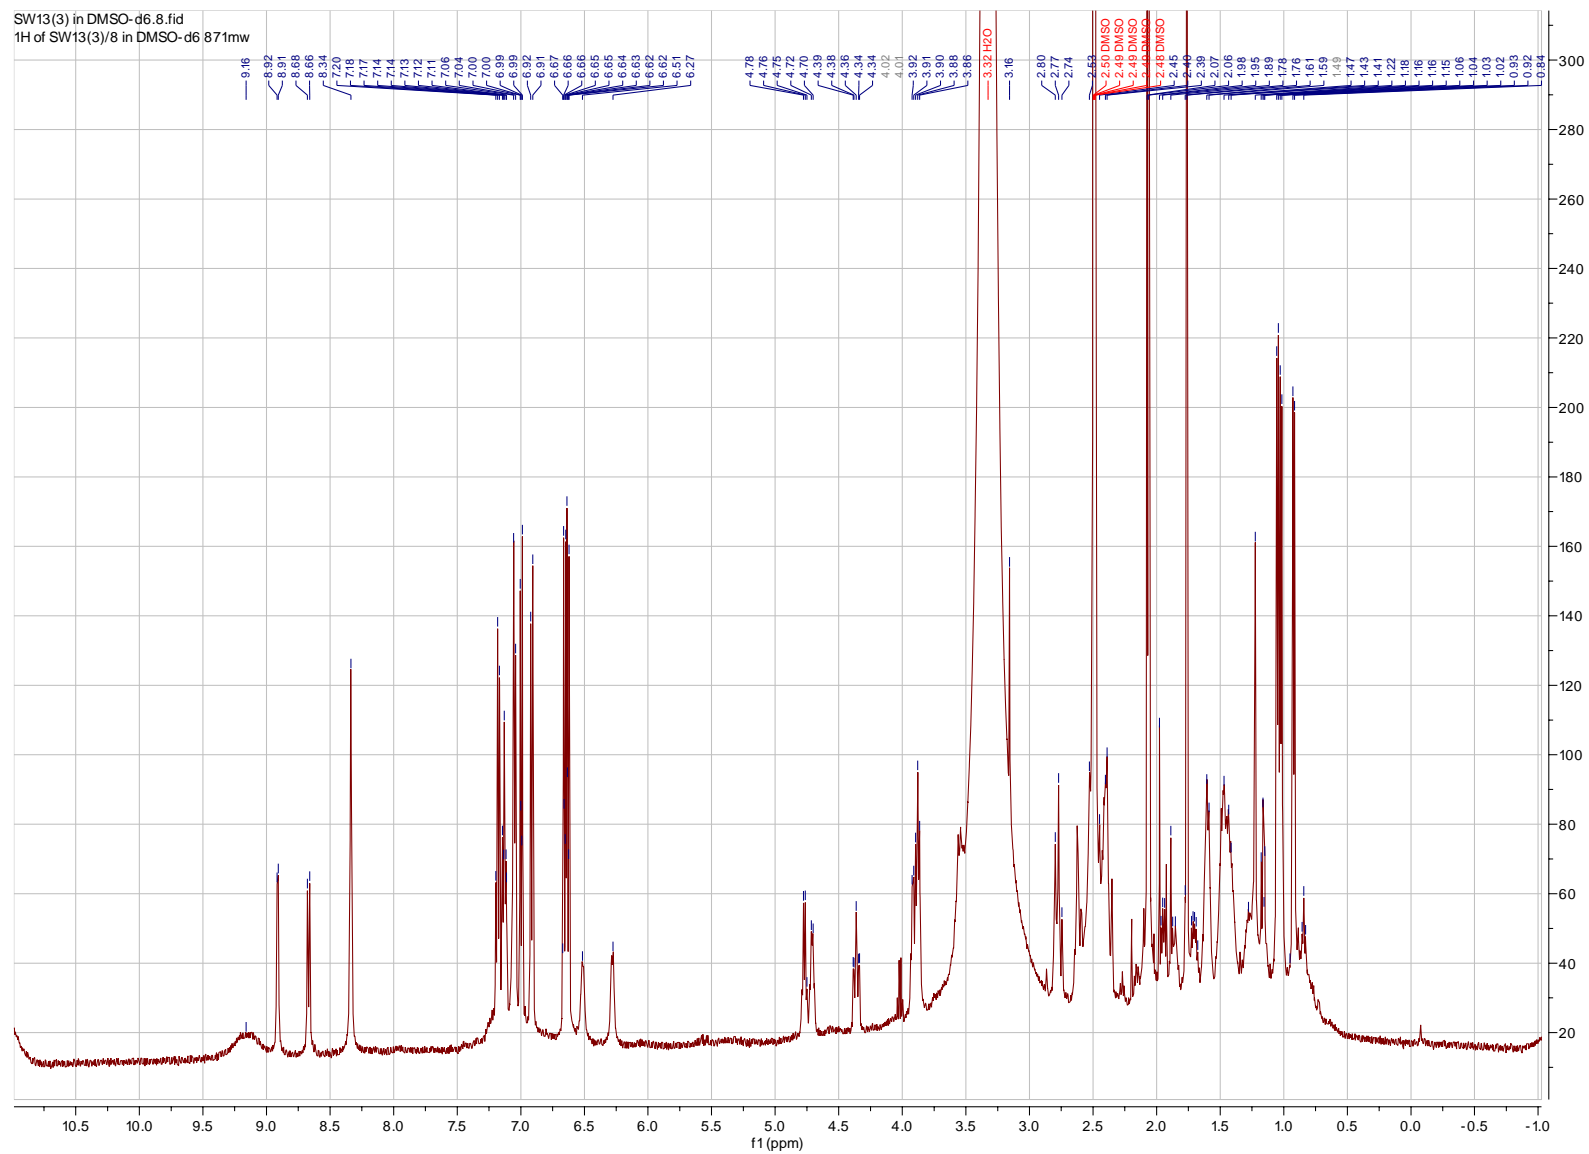



Figure S50.  $^{13}\text{C}$  NMR Spectrum of  $^1[\text{Dht}]$ -Anabaenopeptin A (**5**) in  $\text{DMSO-}d_6$

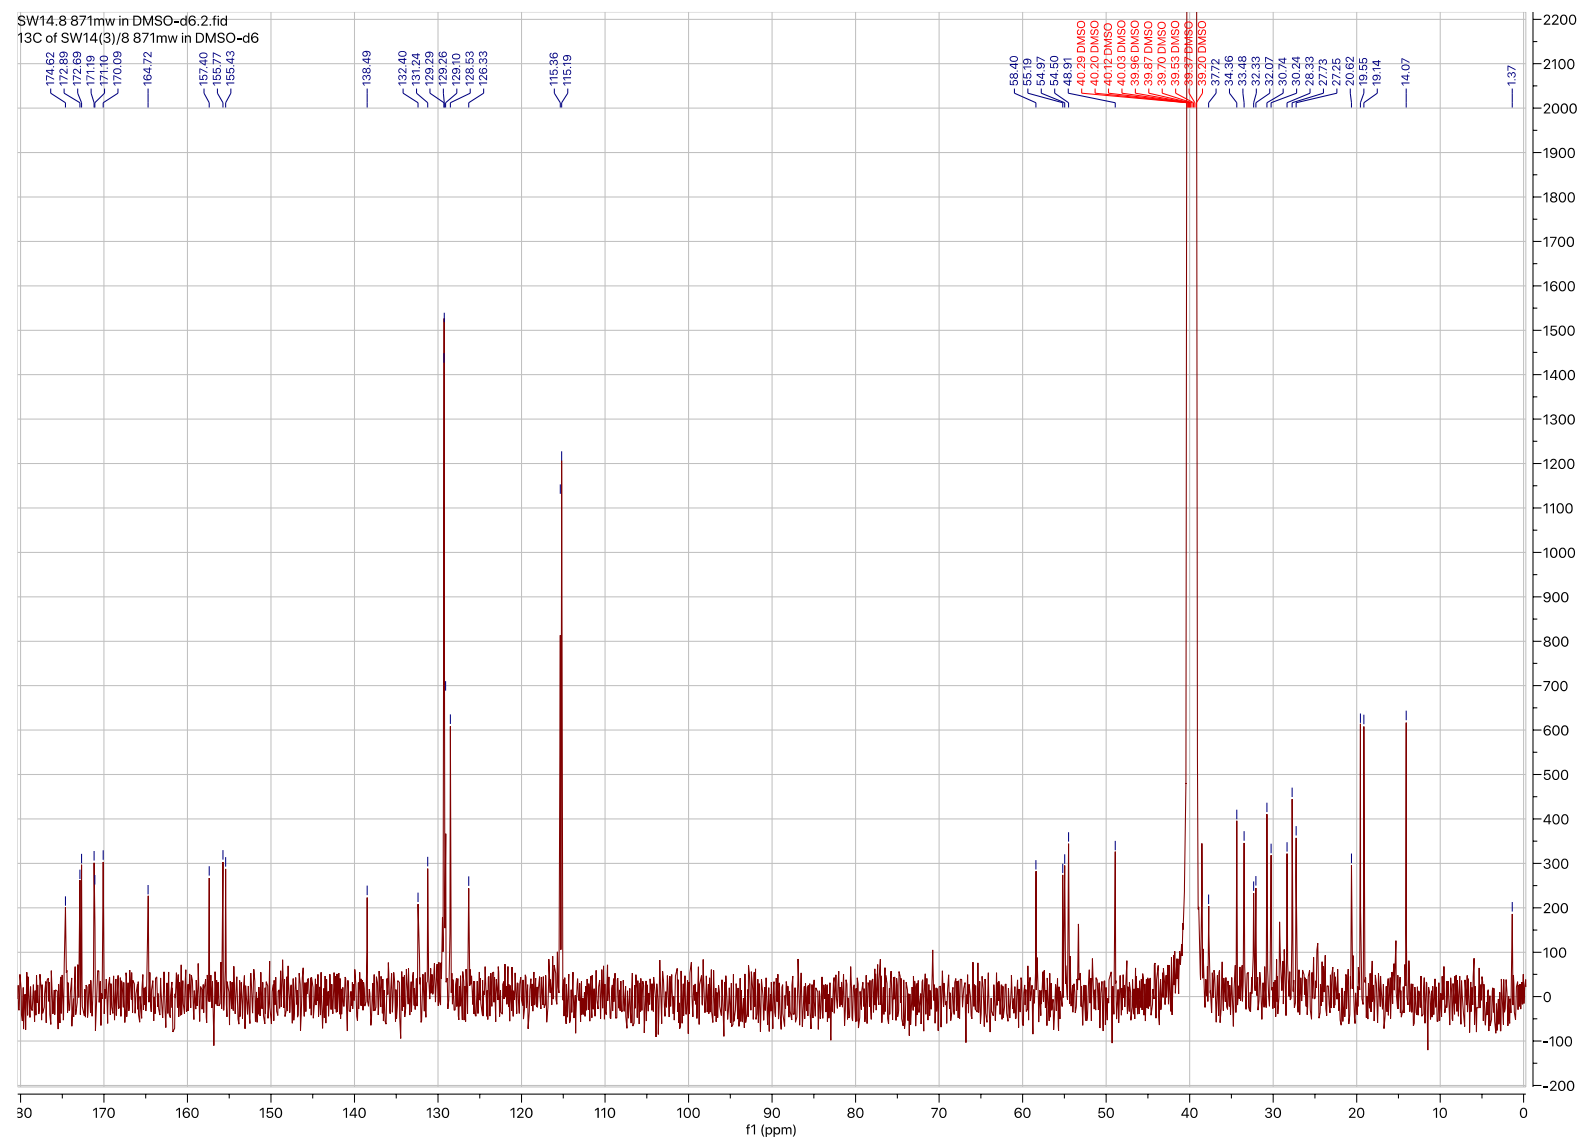

Figure S51. HSQC Spectrum of  $^1\text{[Dht]}$ -Anabaenopeptin A (**5**) in  $\text{DMSO-}d_6$

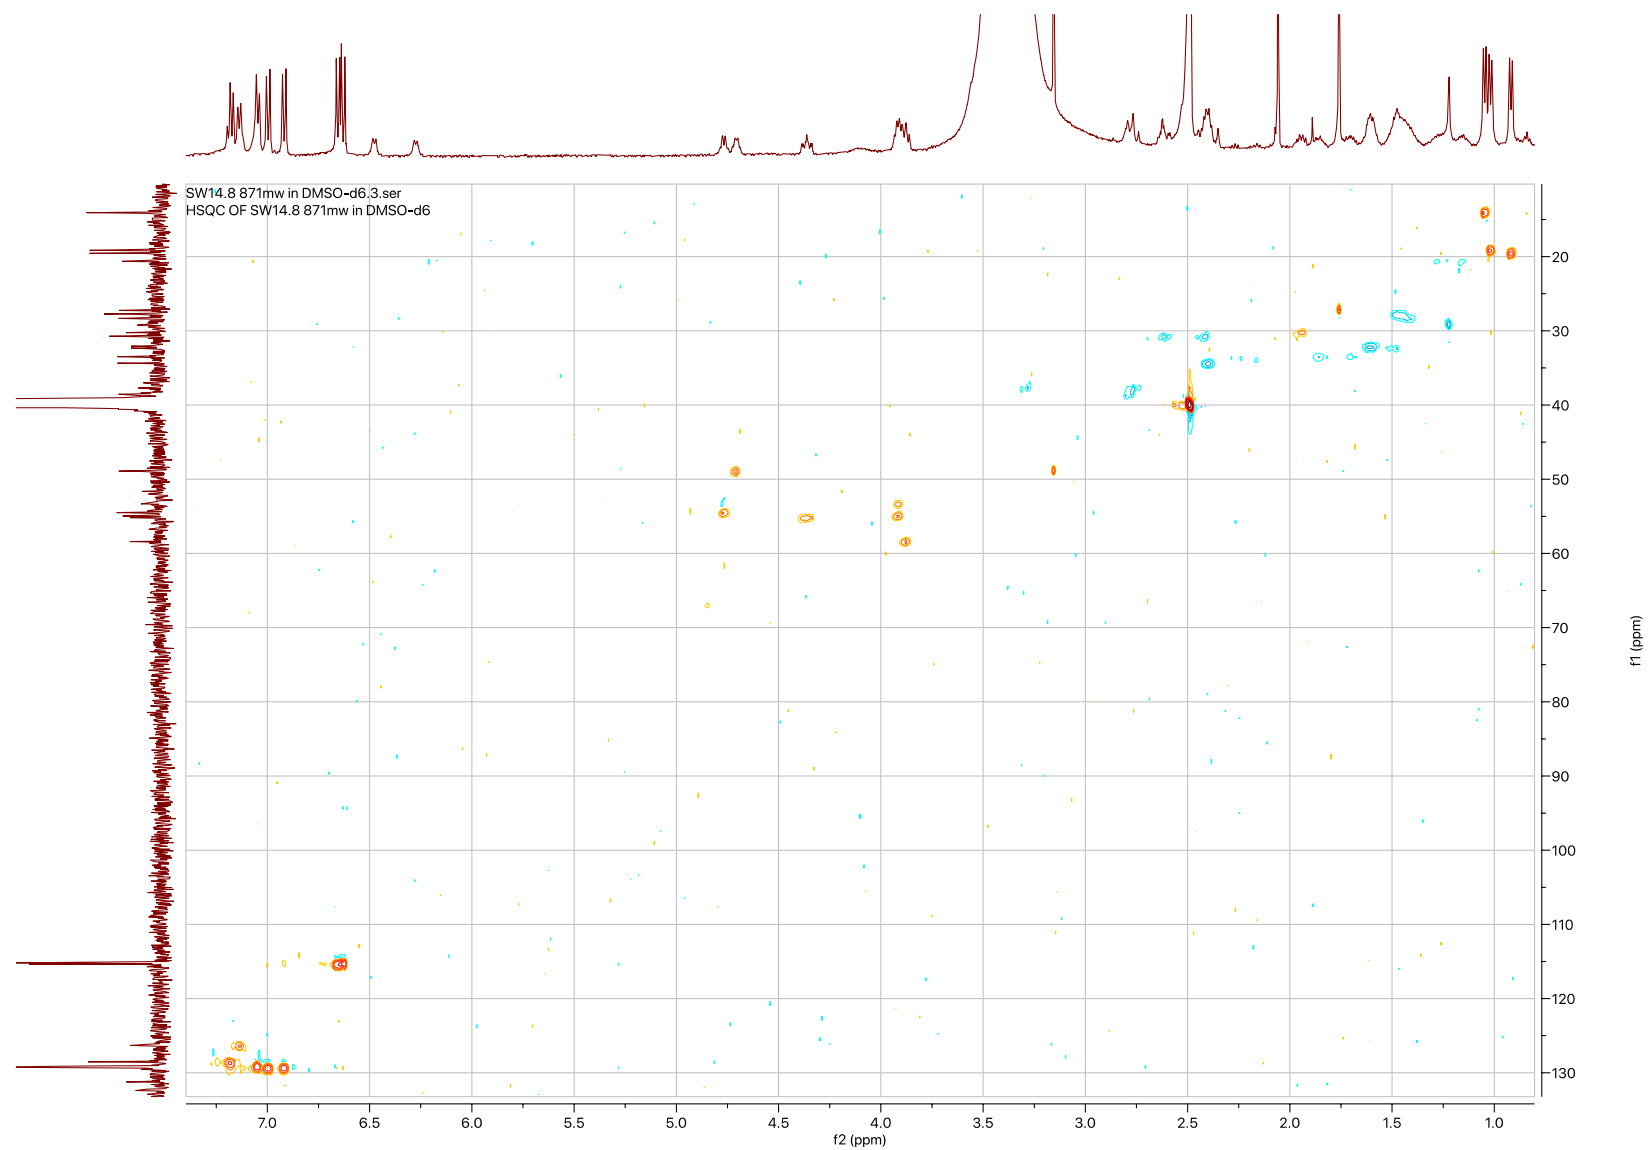

Figure S52. HMBC Spectrum of  $^1$ [Dht]-Anabaenopeptin A (**5**) in DMSO- $d_6$

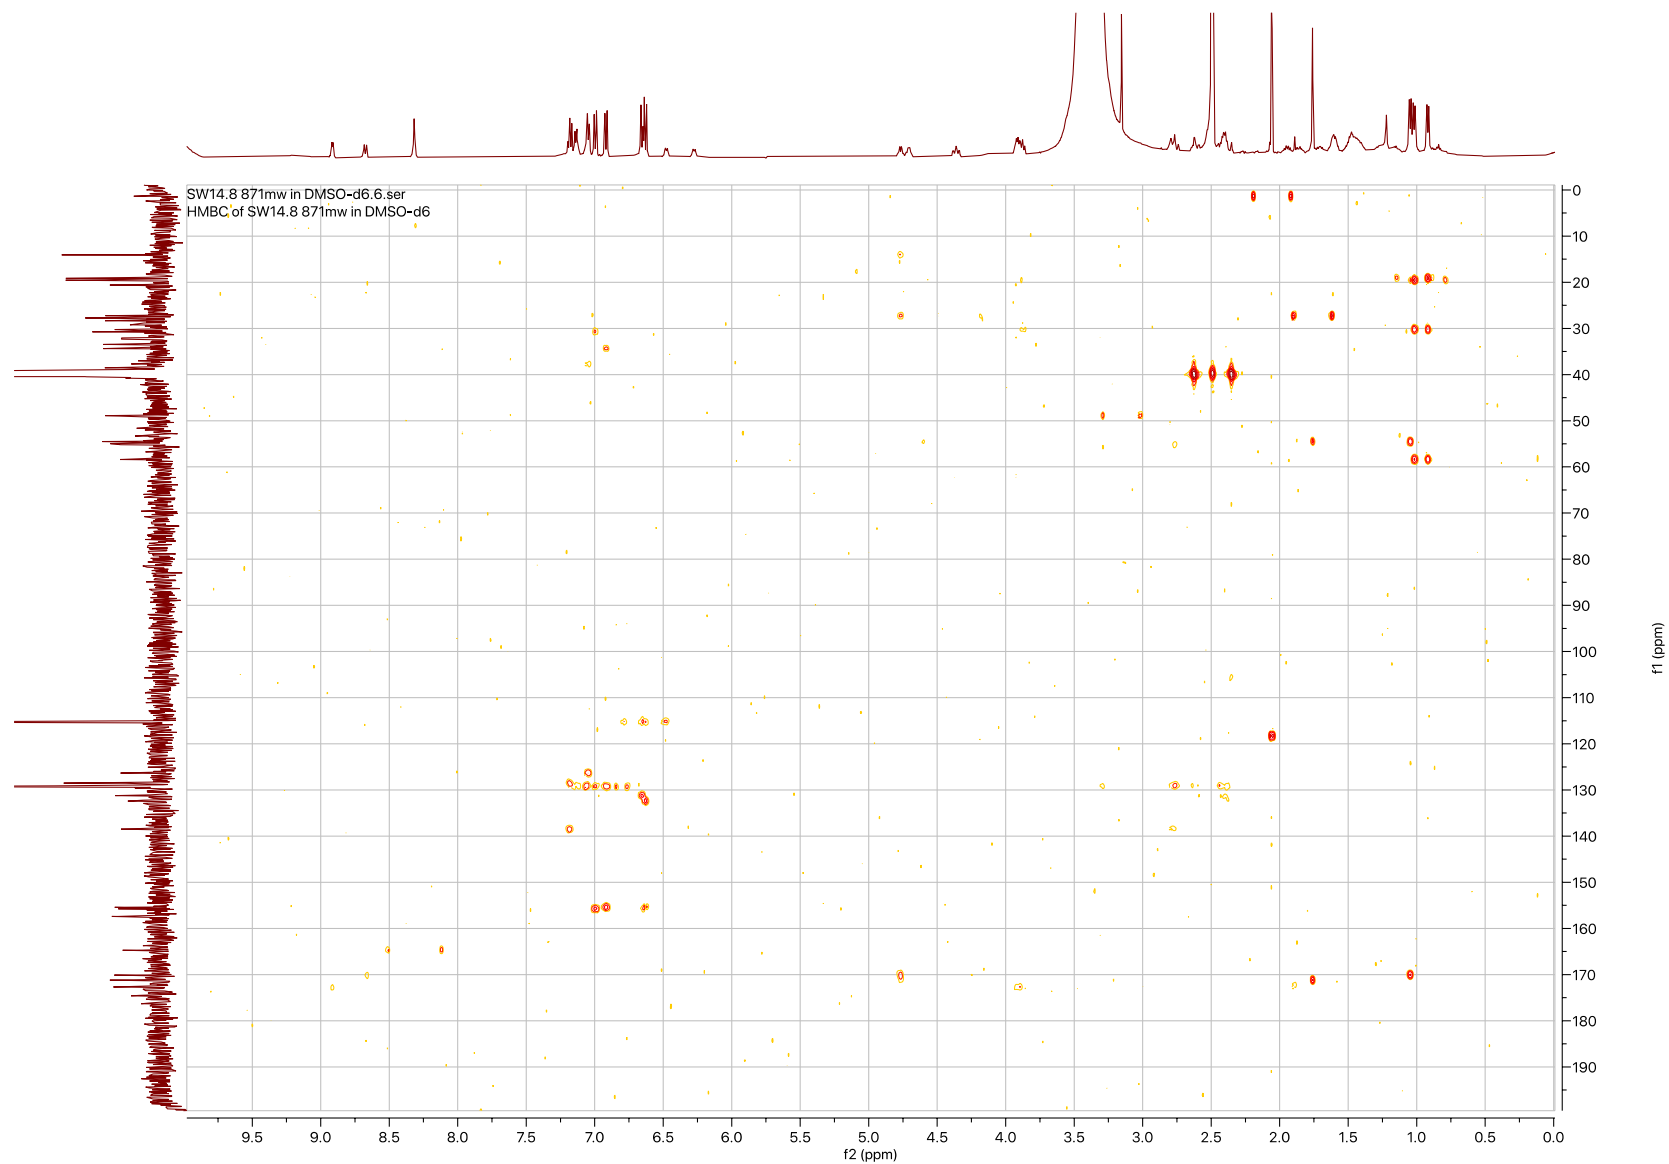

Figure S53. COSY Spectrum of  $^1\text{[Dht]}$ -Anabaenopeptin A (**5**) in  $\text{DMSO-}d_6$

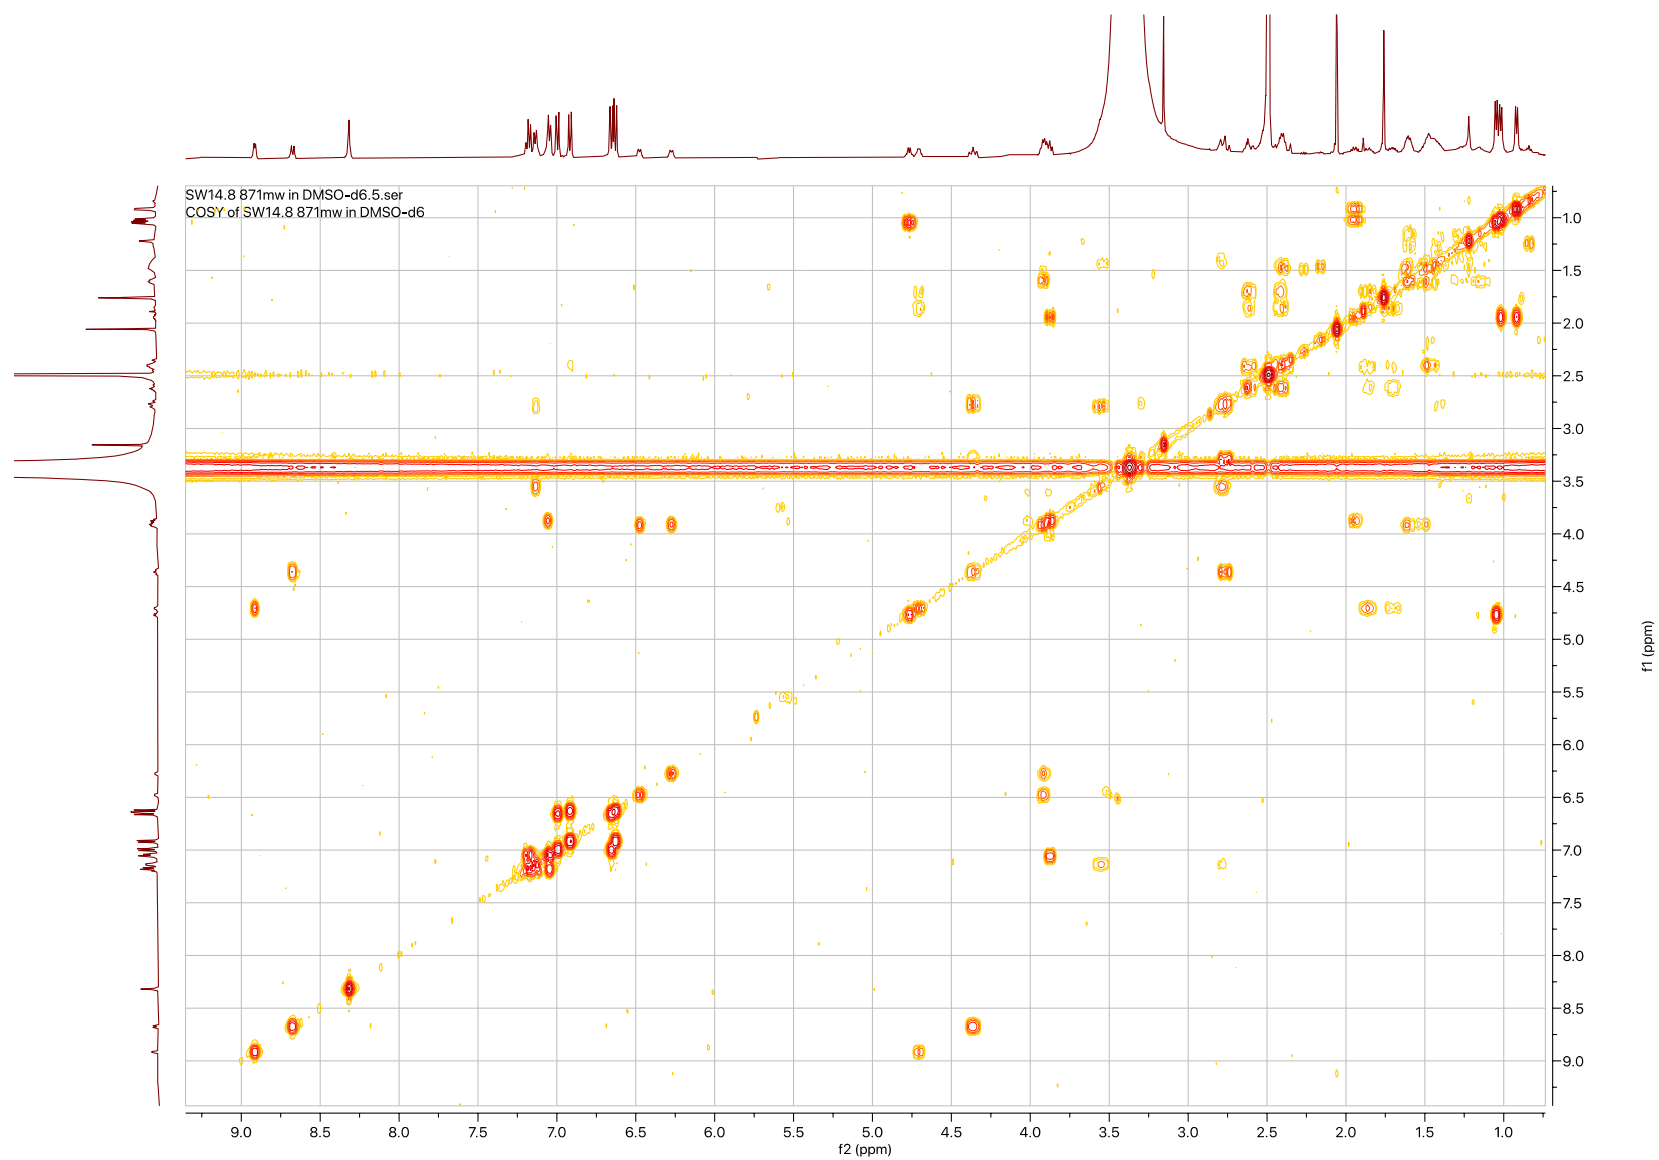

Figure S54. TOCSY Spectrum of  $^1\text{[Dht]}$ -Anabaenopeptin A (**5**) in  $\text{DMSO-}d_6$

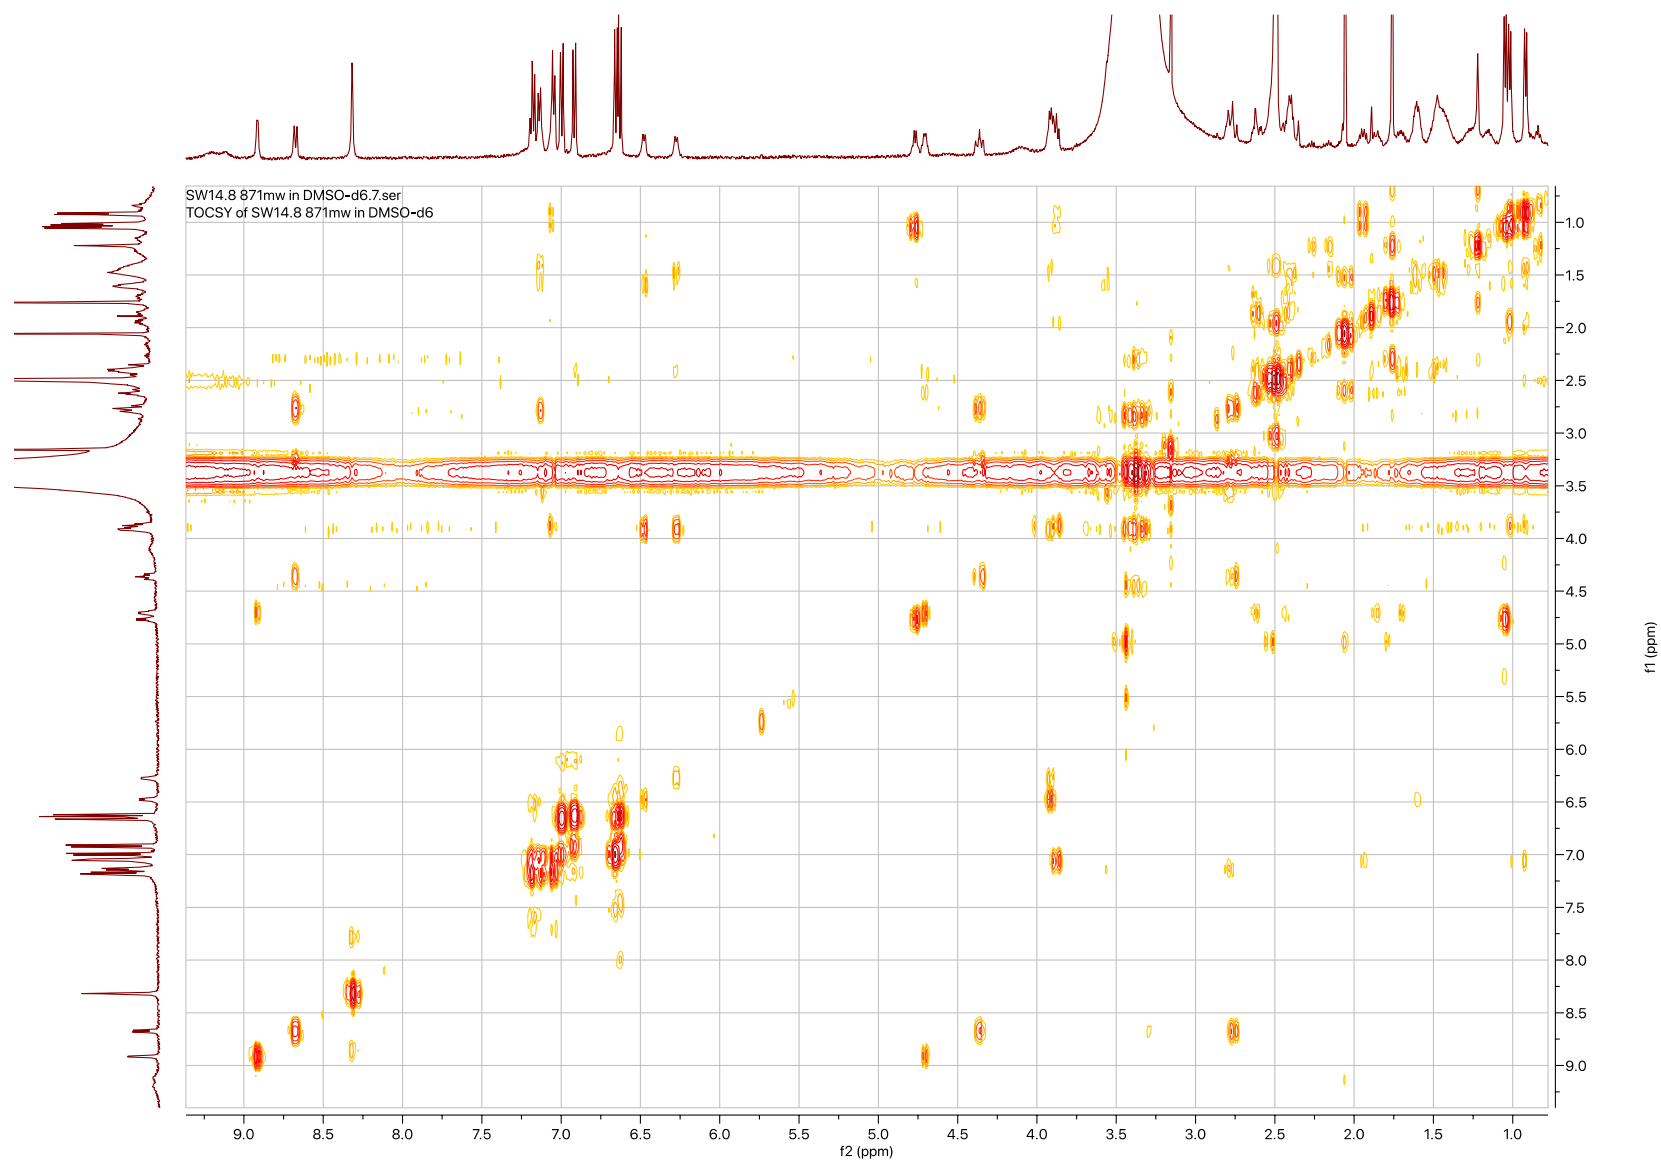

Figure S55. ROESY Spectrum of  $^1\text{[Dht]}$ -Anabaenopeptin A (**5**) in  $\text{DMSO-}d_6$

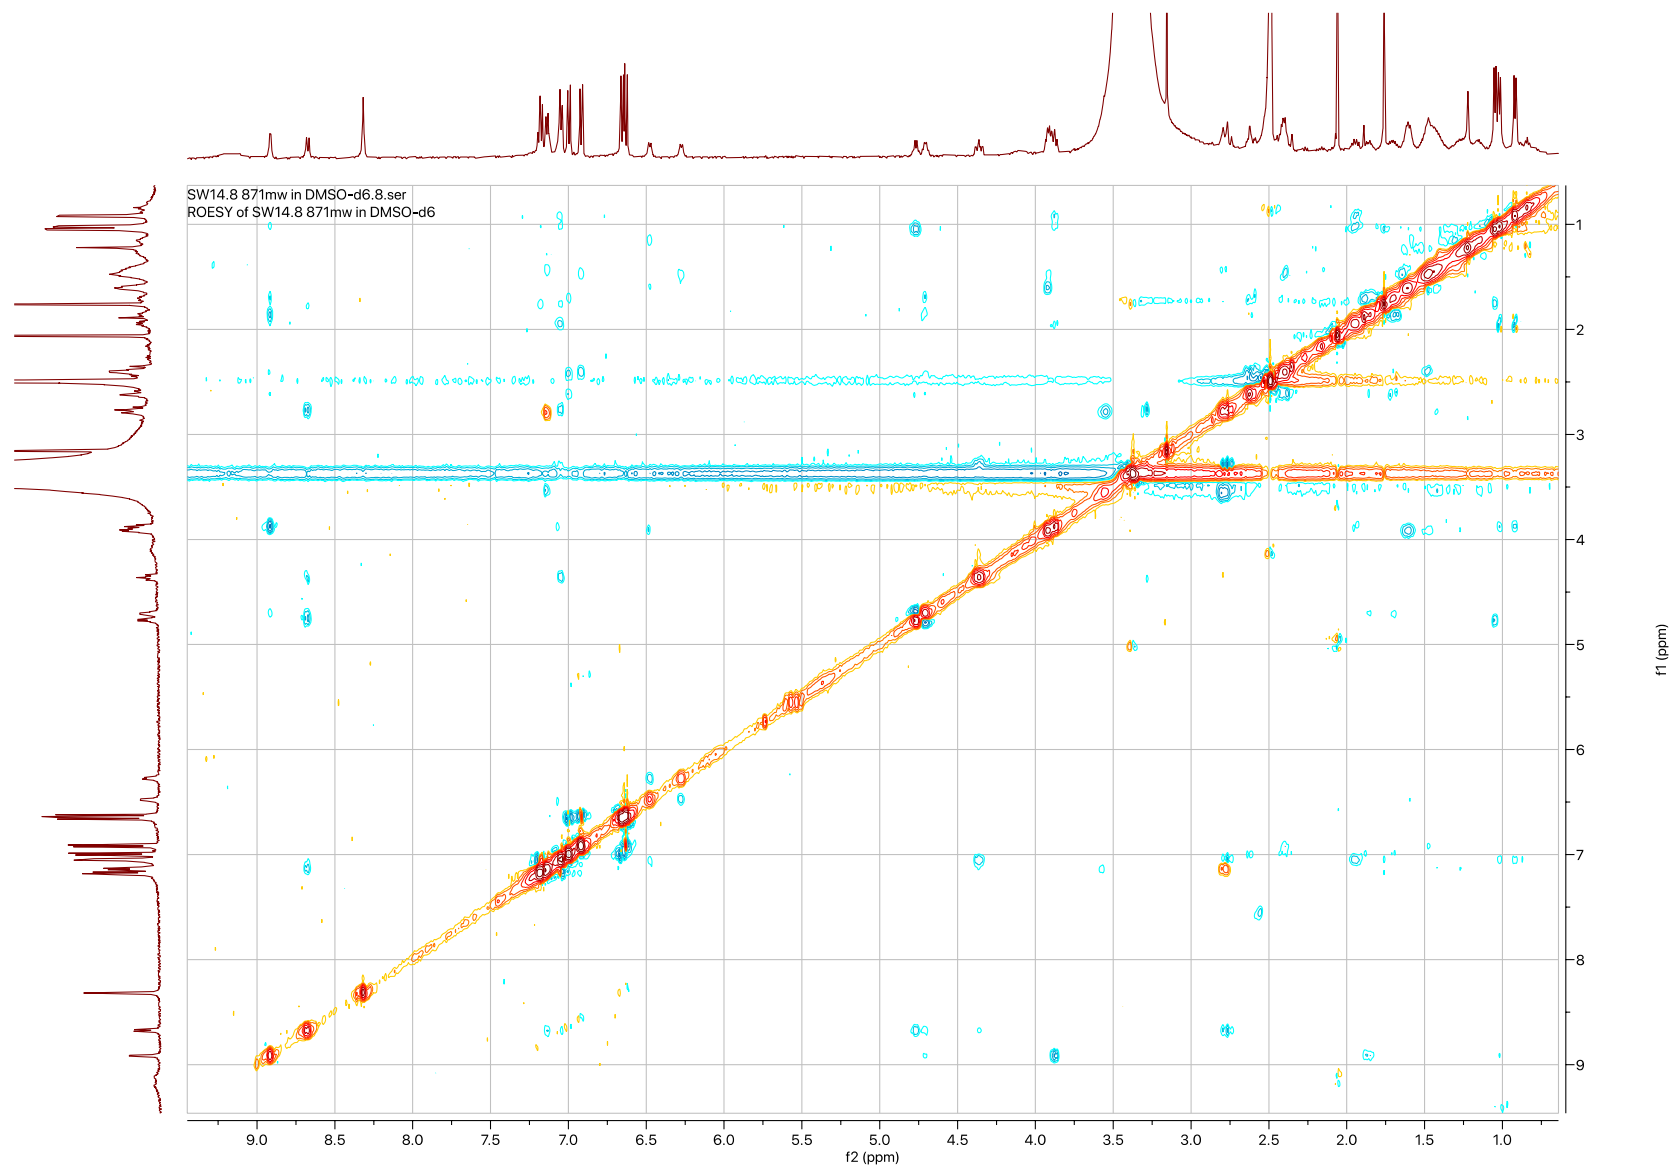

Figure S56. Positive HR ESI MS of <sup>1</sup>[Dht]-Anabaenopeptin A (5)

**Single Mass Analysis**

Tolerance = 3.0 PPM / DBE: min = -1.5, max = 100.0

Element prediction: Off

Number of isotope peaks used for i-FIT = 3

Monoisotopic Mass, Odd and Even Electron Ions

462 formula(e) evaluated with 4 results within limits (up to 10 best isotopic matches for each mass)

Elements Used:

| Mass     | Calc. Mass | mDa  | PPM  | DBE  | Formula        | i-FIT | i-FIT Norm | Fit Conf % | C  | H  | N  | O  |
|----------|------------|------|------|------|----------------|-------|------------|------------|----|----|----|----|
| 872.4560 | 872.4585   | -2.5 | -2.9 | 24.0 | C49 H60 N8 O7  | 79.0  | 0.964      | 38.16      | 49 | 60 | 8  | 7  |
|          | 872.4558   | 0.2  | 0.2  | 19.5 | C46 H62 N7 O10 | 79.3  | 1.336      | 26.28      | 46 | 62 | 7  | 10 |
|          | 872.4572   | -1.2 | -1.4 | 24.5 | C47 H58 N11 O6 | 79.4  | 1.423      | 24.09      | 47 | 58 | 11 | 6  |
|          | 872.4545   | 1.5  | 1.7  | 20.0 | C44 H60 N10 O9 | 80.2  | 2.165      | 11.47      | 44 | 60 | 10 | 9  |

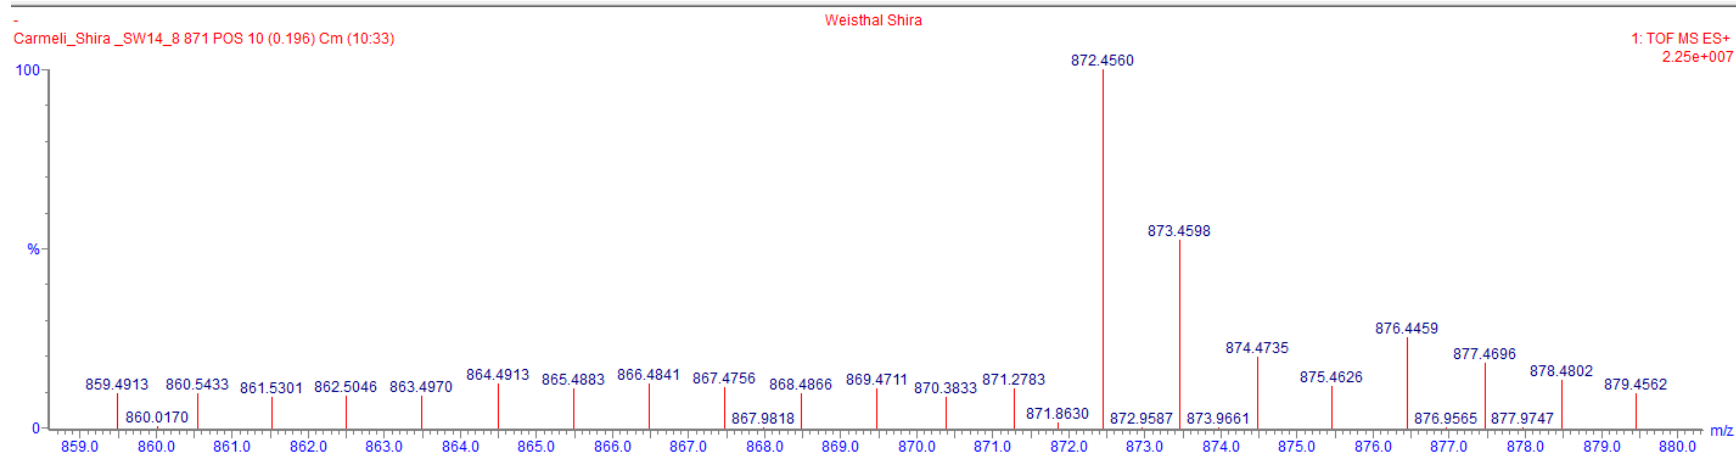

Figure S57. Positive HR ESI MS/MS Spectrum of <sup>1</sup>[Dht]-Anabaenopeptin A (**5**)

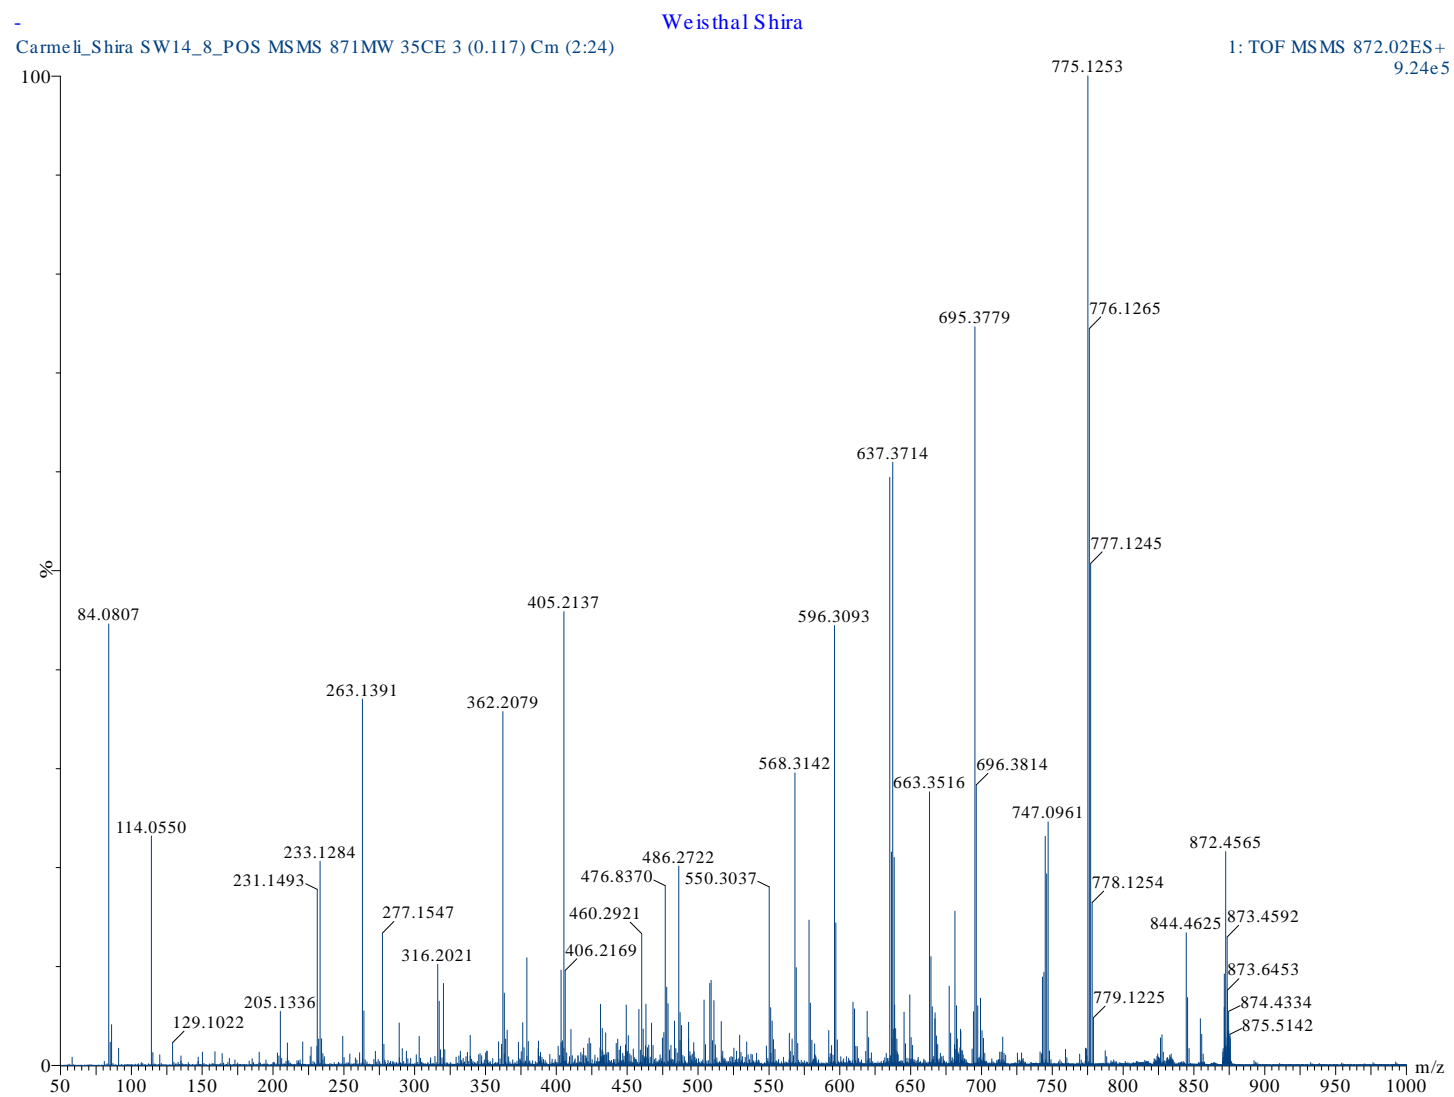



Figure S58. Scheme of Fragmentation in the Positive HR ESI MS/MS Spectrum of  $^1[\text{Dht}]\text{-Anabaenopeptin A (5)}$

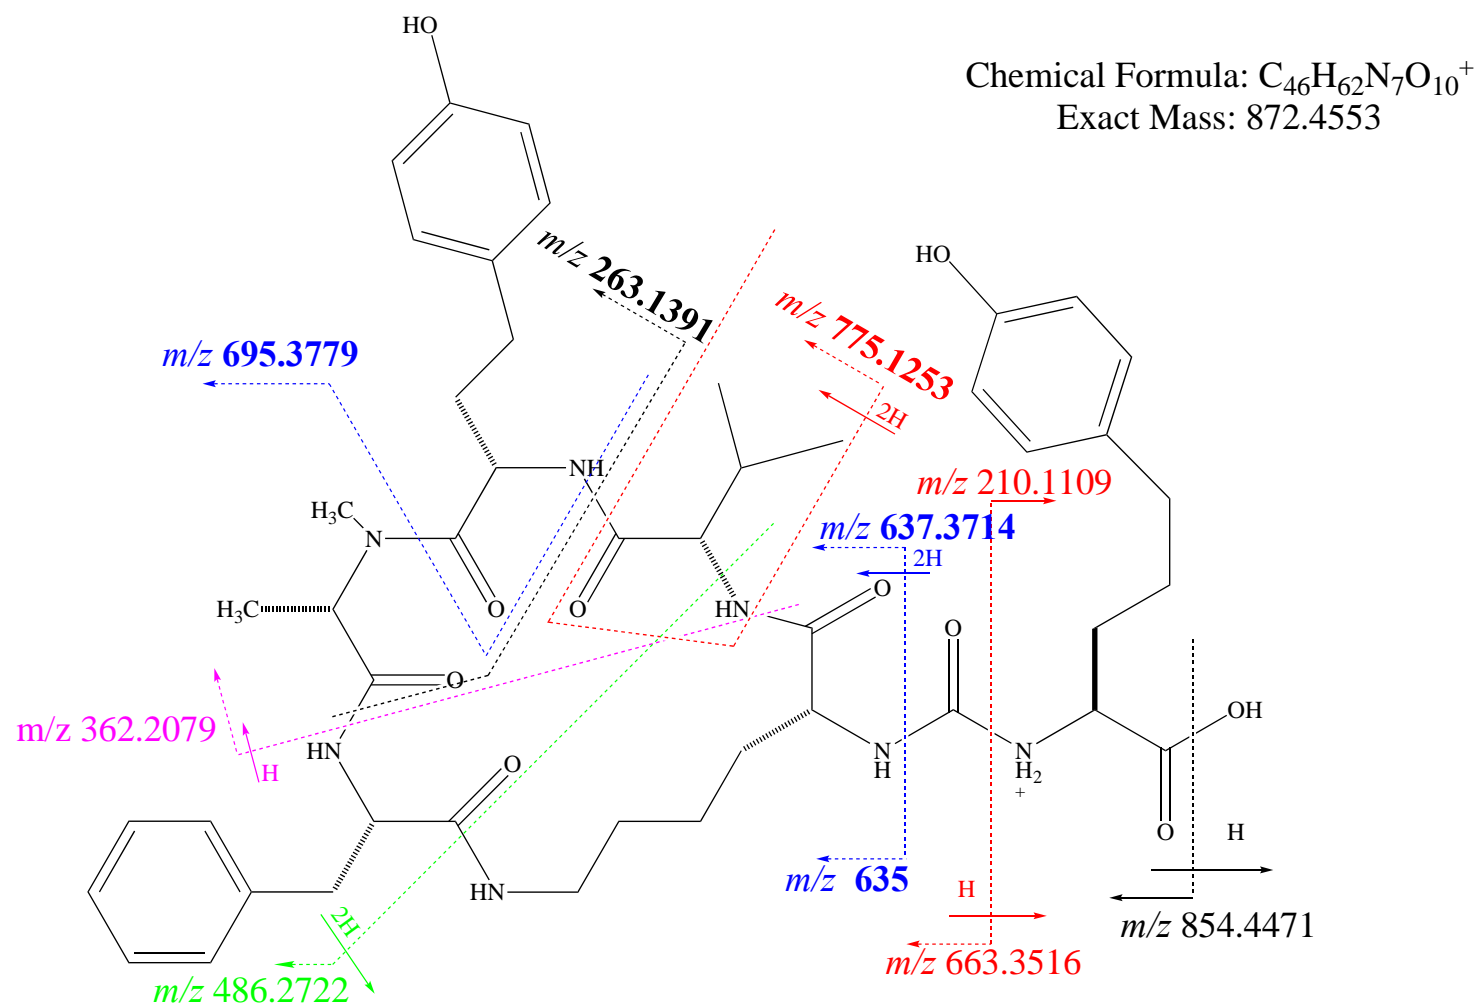

Figure S59. LCMS Traces of Marfey's Method Amino Acids Analysis of <sup>1</sup>[Dht]-Anabaenopeptin A (5)

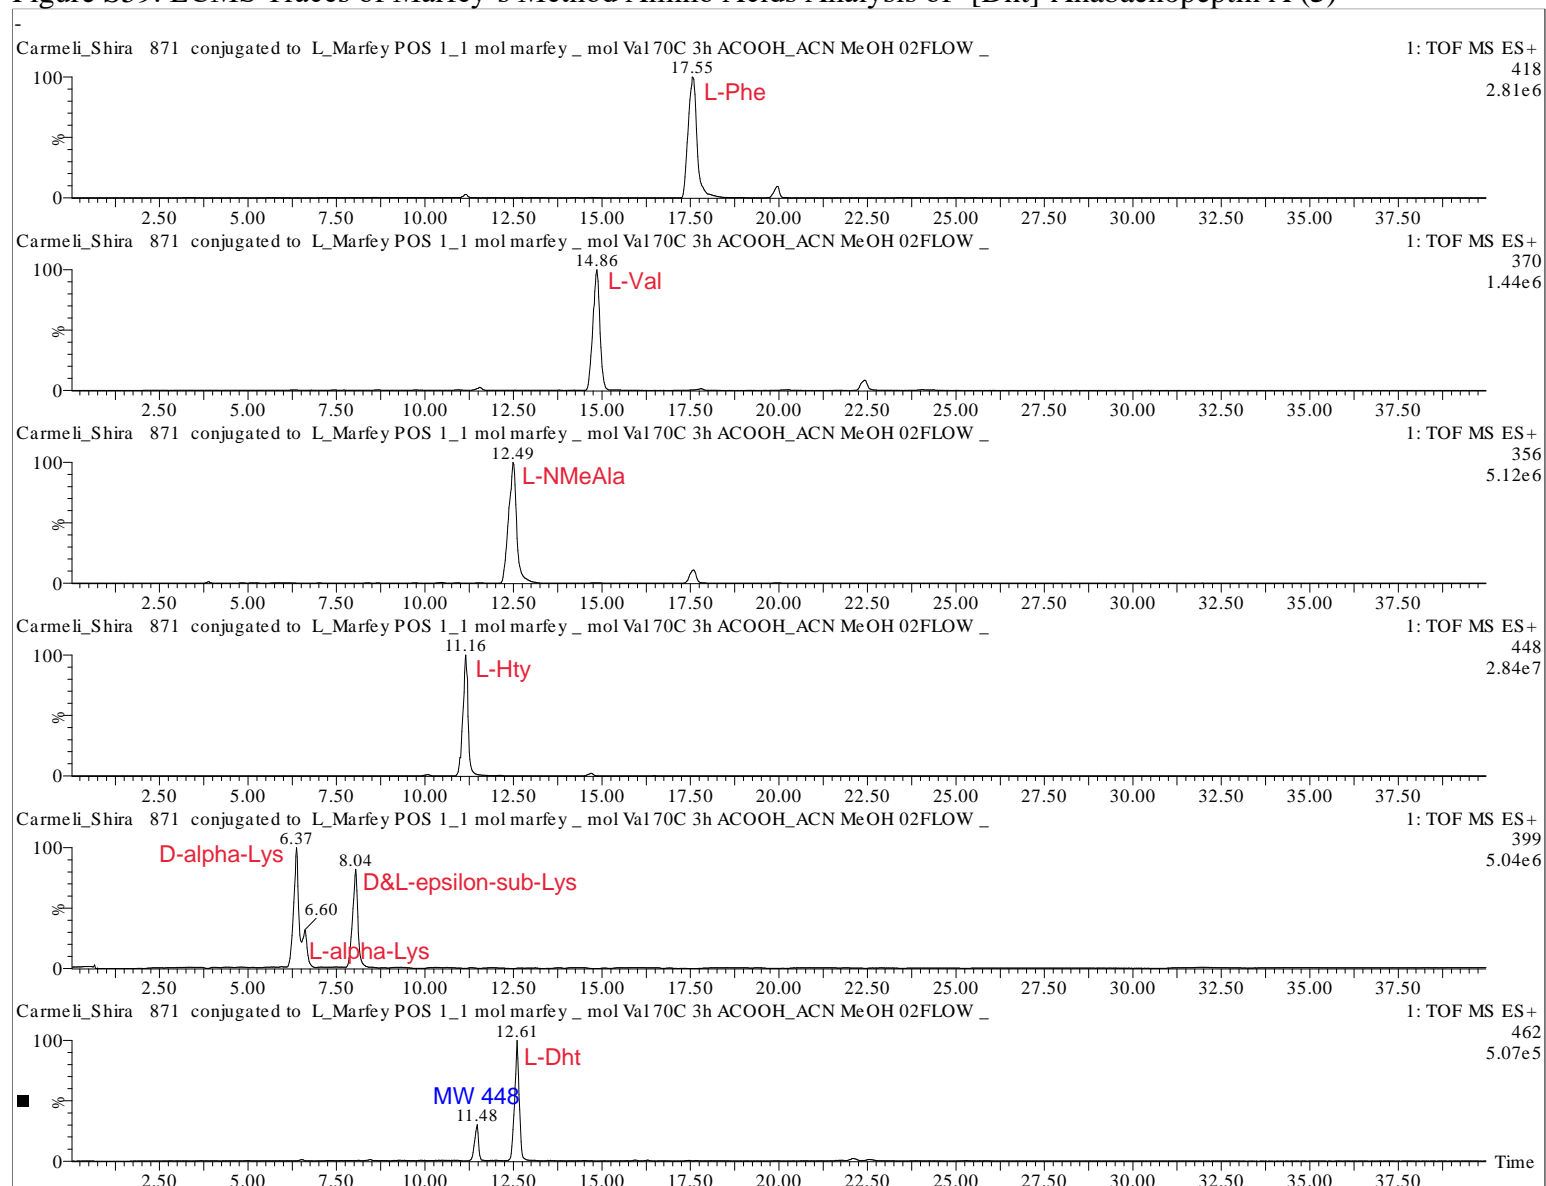

Table S5. NMR Data of <sup>1</sup>[Dht]-Anabaenopeptin A (**5**) in DMSO-*d*<sub>6</sub>

| Position  | δ <sub>C</sub> , Mult. | δ <sub>H</sub> , Mult. (J in Hz) <sup>b</sup> | HMBC correlations <sup>c</sup> | COSY correlations              | TOCSY correlations               | ROESY correlations     |
|-----------|------------------------|-----------------------------------------------|--------------------------------|--------------------------------|----------------------------------|------------------------|
| Dht-1     | 174.6, C               |                                               |                                |                                |                                  |                        |
| Dht-2     | 53.3, CH               | 3.91, m                                       | Dht-3a                         | Dht-2-NH, 3a, 3b               | Dht-2-NH, 3a, 3b, 4a, 4b         |                        |
| Dht-3a    | 32.3, CH <sub>2</sub>  | 1.61, m                                       |                                | Dht-2, 3b, 4a, 4b              | Dht-2, 2-NH, 3b, 4a, 4b          |                        |
| Dht-3b    |                        | 1.50, m                                       |                                | Dht-2, 3a, 4a, 4b              | Dht-2, 2-NH, 3a, 4a, 4b          |                        |
| Dht-2-NH  |                        | 6.27, brd (7.0)                               |                                | Dht-2                          | Dht-2, 3a, 3b, 4a, 4b            | Lys-2-NH, Dht-4a       |
| Dht-4a    | 27.7, CH <sub>2</sub>  | 1.48, m                                       | Dht-5                          | Dht-3a, 3b, 5<br>Dht-3a, 3b, 5 | Dht-2, 2-NH, 5<br>Dht-2, 2-NH, 5 | Dht-2-NH 7,7'          |
| Dht-4b    |                        | 1.45, m                                       |                                |                                |                                  |                        |
| Dht-5     | 34.4, CH <sub>2</sub>  | 2.40, m                                       | Dht-4b, 7,7'                   | Dht-4a, 4b                     |                                  | Dht-7,7'               |
| Dht-6     | 132.4, C               |                                               | Dht-5, 8,8'                    |                                |                                  |                        |
| Dht-7,7'  | 129.2, CH x2           | 6.92, d (8.5)                                 | Dht-5, 7',7,                   | Dht-8,8'                       | Dht-8,8'                         | Dht-4a, 5, 8,8'        |
| Dht-8,8'  | 115.2, CH x2           | 6.63, d (8.5)                                 | Dht-8',8                       | Dht-7,7'                       | Dht-7,7'                         | Dht-7,7'               |
| Dht-9     | 155.4, C               |                                               | Dht-7,7', 8,8'                 |                                |                                  |                        |
| Dht-9-OH* |                        | 9.20, brs                                     |                                |                                |                                  |                        |
| CO        | 157.4, C               |                                               |                                |                                |                                  |                        |
| Lys-1     | 172.7, C               |                                               | Lys-2                          |                                |                                  |                        |
| Lys-2     | 55.0, CH               | 3.91, ddd (5.4, 6.3, 7.4)                     |                                | Lys-3, 6-NH                    | Lys-3, 6-NH                      |                        |
| Lys-2-NH  |                        | 6.48, brd (6.9)                               |                                | Lys-2                          | Lys-2, 3                         | Dht-2-NH, Lys-2, 3, 4b |
| Lys-3     | 32.1, CH <sub>2</sub>  | 1.60, m                                       | Lys-2                          | Lys-2, 4a, 4b                  | Lys-2, 2-NH                      | Lys-2, 2-NH            |

|          |                       |                          |                  |                                  |                                        |                                  |
|----------|-----------------------|--------------------------|------------------|----------------------------------|----------------------------------------|----------------------------------|
| Lys-4a   | 20.6, CH <sub>3</sub> | 1.28, m<br>1.16, m       | Lys-2            | Lys-3, 5                         |                                        | Lys-2, 2-NH, 6-NH<br>Lys-2, 2-NH |
| Lys-4b   |                       |                          |                  | Lys-3, 5                         |                                        |                                  |
| Lys-5    | 28.3, CH <sub>2</sub> | 1.41, m                  |                  | Lys-4a, 4b, 6a, 6b               | Lys-6-NH                               | Lys-2, 6-NH                      |
| Lys-6a   | 38.5, CH <sub>2</sub> | 3.56, m                  |                  | Lys-6b, 6-NH, 5                  | Lys-6b, 6-NH<br>Lys-6a, 6-NH, 5        | Lys-6-NH                         |
| Lys-6b   |                       | 2.78, m                  |                  | Lys-6a, 6-NH, 5                  |                                        | Lys-6-NH                         |
| Lys-6-NH |                       | 7.14, m                  |                  | Lys-6a, 6b                       | Lys-5, 6a, 6b                          | Phe-2-NH, Lys-4a, 5, 6a, 6b(-)   |
| Val-1    | 172.9, C              |                          | Hty-2-NH         |                                  |                                        |                                  |
| Val-2    | 58.4, CH              | 3.88, dd (7.4, 8.5)      | Val-3, 4, 5      | Val-2-NH                         | Val-2-NH, 3, 4, 5                      | Hty-2-NH, Val-3, 4, 5            |
| Val-2-NH |                       | 7.06, m                  |                  | Val-2                            | Val-2, 3, 4, 5                         |                                  |
| Val-3    | 30.2, CH <sub>2</sub> | 1.95, dq (8.5, 6.3, 6.7) | Val-2, 4, 5      | Val-2, 4, 5                      | Val-2, 2-NH, 4, 5                      | Phe-5,5', Val-2,                 |
| Val-4    | 19.6, CH <sub>3</sub> | 0.92, d (6.3)            | Val-2, 5         | Val-3                            | Val-2, 2-NH, 5                         | Val-2,                           |
| Val-5    | 19.1, CH <sub>3</sub> | 1.02, d (6.7)            | Val-2, 4         | Val-3                            | Val-2, 2-NH, 4,                        | Val-2,                           |
| Hty-1    | 171.1, C              |                          | NMe-Ala-2, NMe   |                                  |                                        |                                  |
| Hty-2    | 48.9, CH              | 4.71, dt (6.7, 6.3)      |                  | Hty-2-NH Hty-3a, 3b              | Hty-2-NH Hty-3a, 3b, 4a, 4b            | Hty-2-NH, 3a, 3b, NMe-Ala-2      |
| Hty-2-NH |                       | 8.92, d (4.6)            |                  | Hty-2                            | Hty-2                                  | Hty-2, 3a, 3b, 4a, 4b Val-2      |
| Hty-3a   | 33.5, CH <sub>2</sub> | 1.85, m                  | Hty-4b           | Hty-2, 4a, 4b<br>Hty-2, 4a, 4b   | Hty-2, 3b, 4a, 4b<br>Hty-2, 3a, 4a, 4b | Hty-2, 2-NH<br>Hty-2, 2-NH, 6,6' |
| Hty-3a   |                       | 1.70, m                  |                  |                                  |                                        |                                  |
| Hty-4a   | 30.7, CH <sub>2</sub> | 2.62, m                  | Hty-6,6'         | Hty-3a, 3b, 4b<br>Hty-3a, 3b, 4a | Hty-2, 3a, 3b, 4b<br>Hty-2, 3a, 3b, 4a | Hty-2-NH, 6,6'<br>Hty-2-NH, 6,6' |
| Hty-4b   |                       | 2.41, m                  |                  |                                  |                                        |                                  |
| Hty-5    | 131.2, C              |                          | Hty-4a, 4b, 5,5' |                                  |                                        |                                  |

|                  |                       |                                  |                        |                        |                            |                                          |
|------------------|-----------------------|----------------------------------|------------------------|------------------------|----------------------------|------------------------------------------|
| Hty-6,6'         | 129.3, CH x2          | 7.00, d (8.5)                    | Hty-4a, 4b, 6',6       | Hty-7,7'               | Hty-7,7'                   | Hty-3b, 4a, 4b, 7,7'                     |
| Hty-7,7'         | 115.4, CH x2          | 6.65, d (8.5)                    | Hty-7',7               | Hty-6,6'               | Hty-6,6'                   | Hty-6,6'                                 |
| Hty-8            | 155.8, C              |                                  | Hty-6,6', 7,7'         |                        |                            |                                          |
| Hty-8-OH*        |                       | 9.12, brs                        |                        |                        |                            |                                          |
| NMe-Ala-1        | 170.1, C              |                                  | Phe-2-NH, NMe-Ala-2, 3 |                        |                            |                                          |
| NMe-Ala-2        | 54.5, CH              | 4.77, q (6.7)                    | NMe-Ala-3, NMe         | NMe-Ala-3              | NMe-Ala-3                  | Phe-2-NH, Hty-2, NMe-Ala-3               |
| NMe-Ala-3        | 14.1, CH <sub>3</sub> | 1.05, d (6.7)                    | NMe-Ala-2              | NMe-Ala-2              | NMe-Ala-2                  | NMe-Ala-2                                |
| NMe-Ala-NMe      | 27.3, CH <sub>3</sub> | 1.76, s                          | NMe-Ala-2              |                        |                            | Phe-2-NH, 5,5', 6,6'                     |
| Phe-1            | 171.2, C              |                                  |                        |                        |                            |                                          |
| Phe-2            | 55.2, CH              | 4.36, ddd (3.4, 8.9, 12.7)       | Phe-3b                 | Phe-2-NH, 3a, 3b       | Phe-2-NH, 3a, 3b           | Phe-2-NH, 3a, 3b, 5,5'                   |
| Phe-2-NH         |                       | 8.68, d (9.0)                    |                        | Phe-2                  | Phe-2, 3a, 3b              | Lys-6-NH, NMe-Ala-2, NMe Phe-2, 3b       |
| Phe-3a<br>Phe-3a | 37.7, CH <sub>2</sub> | 3.30, m<br>2.77, dd (12.7, 13.4) | Phe-5,5'               | Phe-2, 3b<br>Phe-2, 3a | Phe-2, 2-NH<br>Phe-2, 2-NH | Phe-2, 3b, 5,5'<br>Phe-2, 2-NH, 3a, 5,5' |
| Phe-4            | 138.5, C              |                                  | Phe-3b, 6,6'           |                        |                            |                                          |
| Phe-5,5'         | 129.1, CH x2          | 7.05, d (7.3)                    | Phe-3a, 3b, 5',5, 7    | Phe-6,6'               | Phe-6,6'                   | Phe-2, 3a, 3b, 6,6', Val-3, NMe-Ala-NMe  |
| Phe-6,6'         | 128.5, CH x2          | 7.18, dd (7.1, 7.3)              | Phe-6',6               | Phe-5,5',7             | Phe-5,5', 7                | Phe-5,5', 7                              |
| Phe-7            | 126.3, CH             | 7.13, t (7.1)                    | Phe-5,5'               | Phe-6,6'               | Phe-6,6'                   | Phe-6,6'                                 |

<sup>a</sup>500 MHz for <sup>1</sup>H and 125 MHz for <sup>13</sup>C. <sup>b</sup>From HSQC correlations. <sup>c</sup>J<sub>C-H</sub>=8 Hz. \*May interchange.

Figure S60. LCMS Chromatogram and Mass spectrum of <sup>1</sup>[Dht]-Anabaenopeptin A (5)

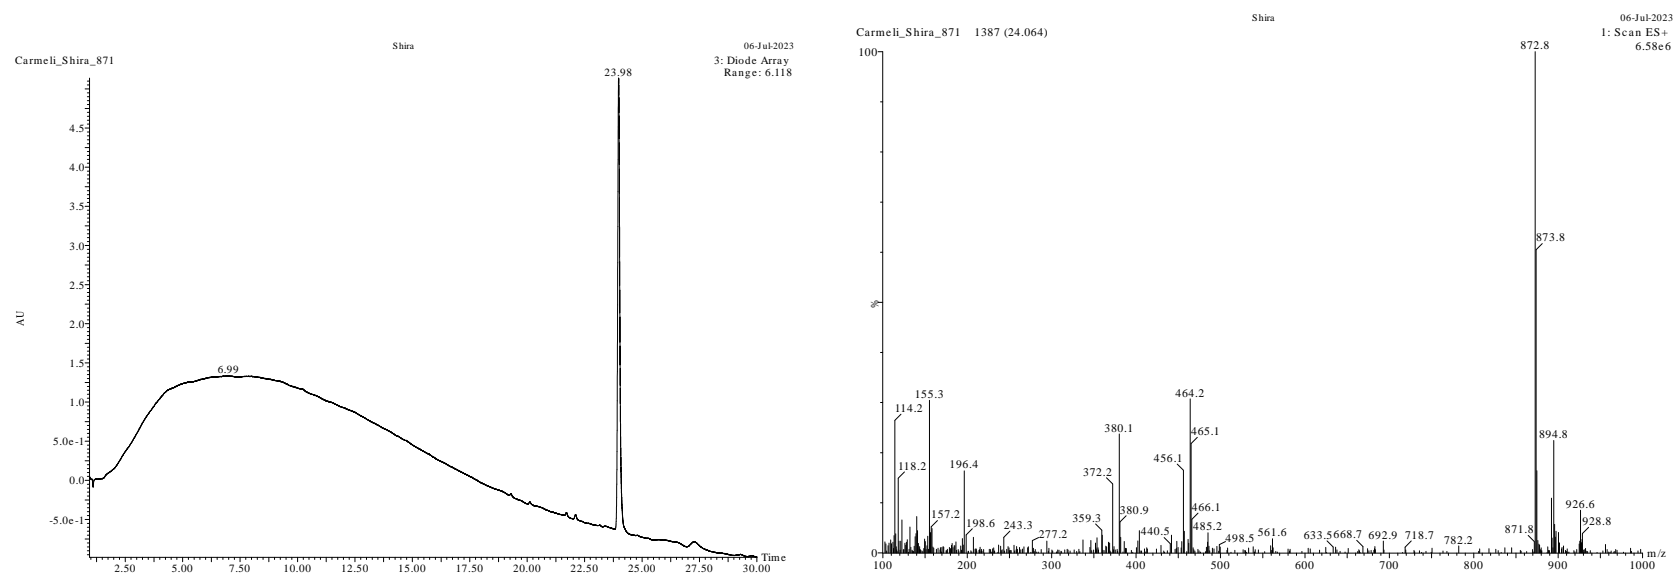

Figure S61.  $^1\text{H}$  NMR Spectrum of Hydanto- $^1[\text{Dht}]$ -anabaenopeptin A (**6**) in  $\text{DMSO}-d_6$

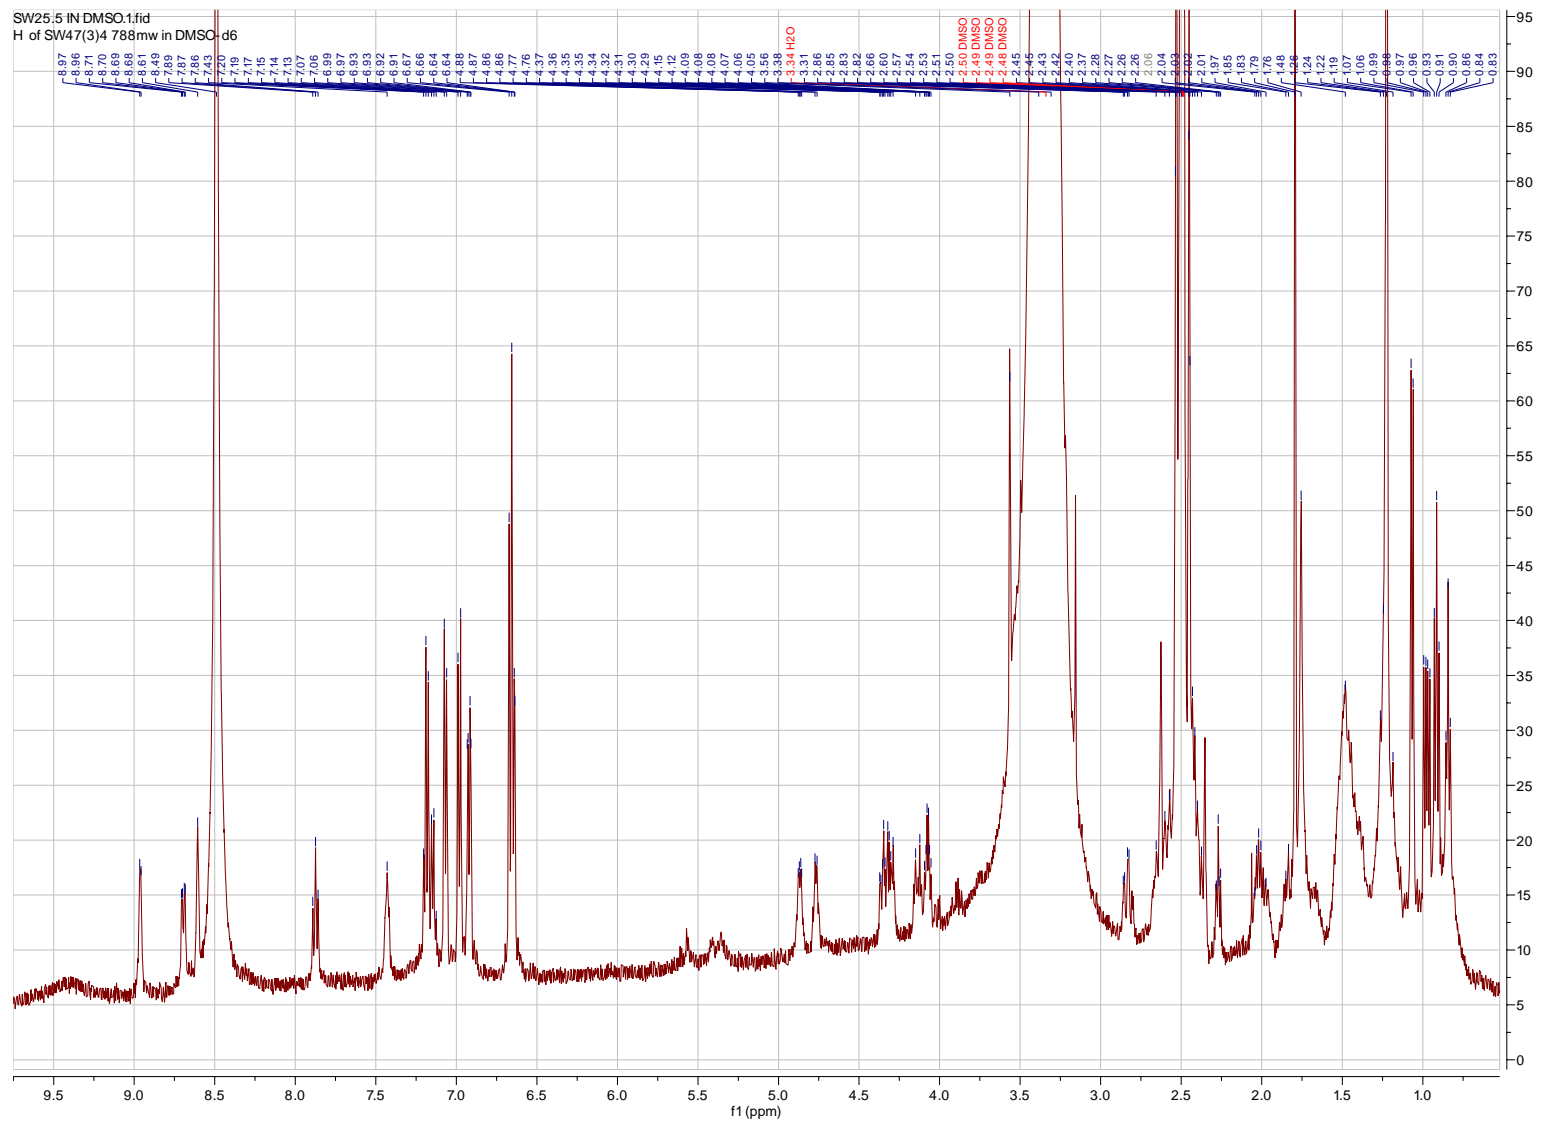

Figure S62.  $^{13}\text{C}$  NMR Spectrum of Hydato- $^1[\text{Dht}]$ -anabaenopeptin A (**6**) in  $\text{DMSO}-d_6$

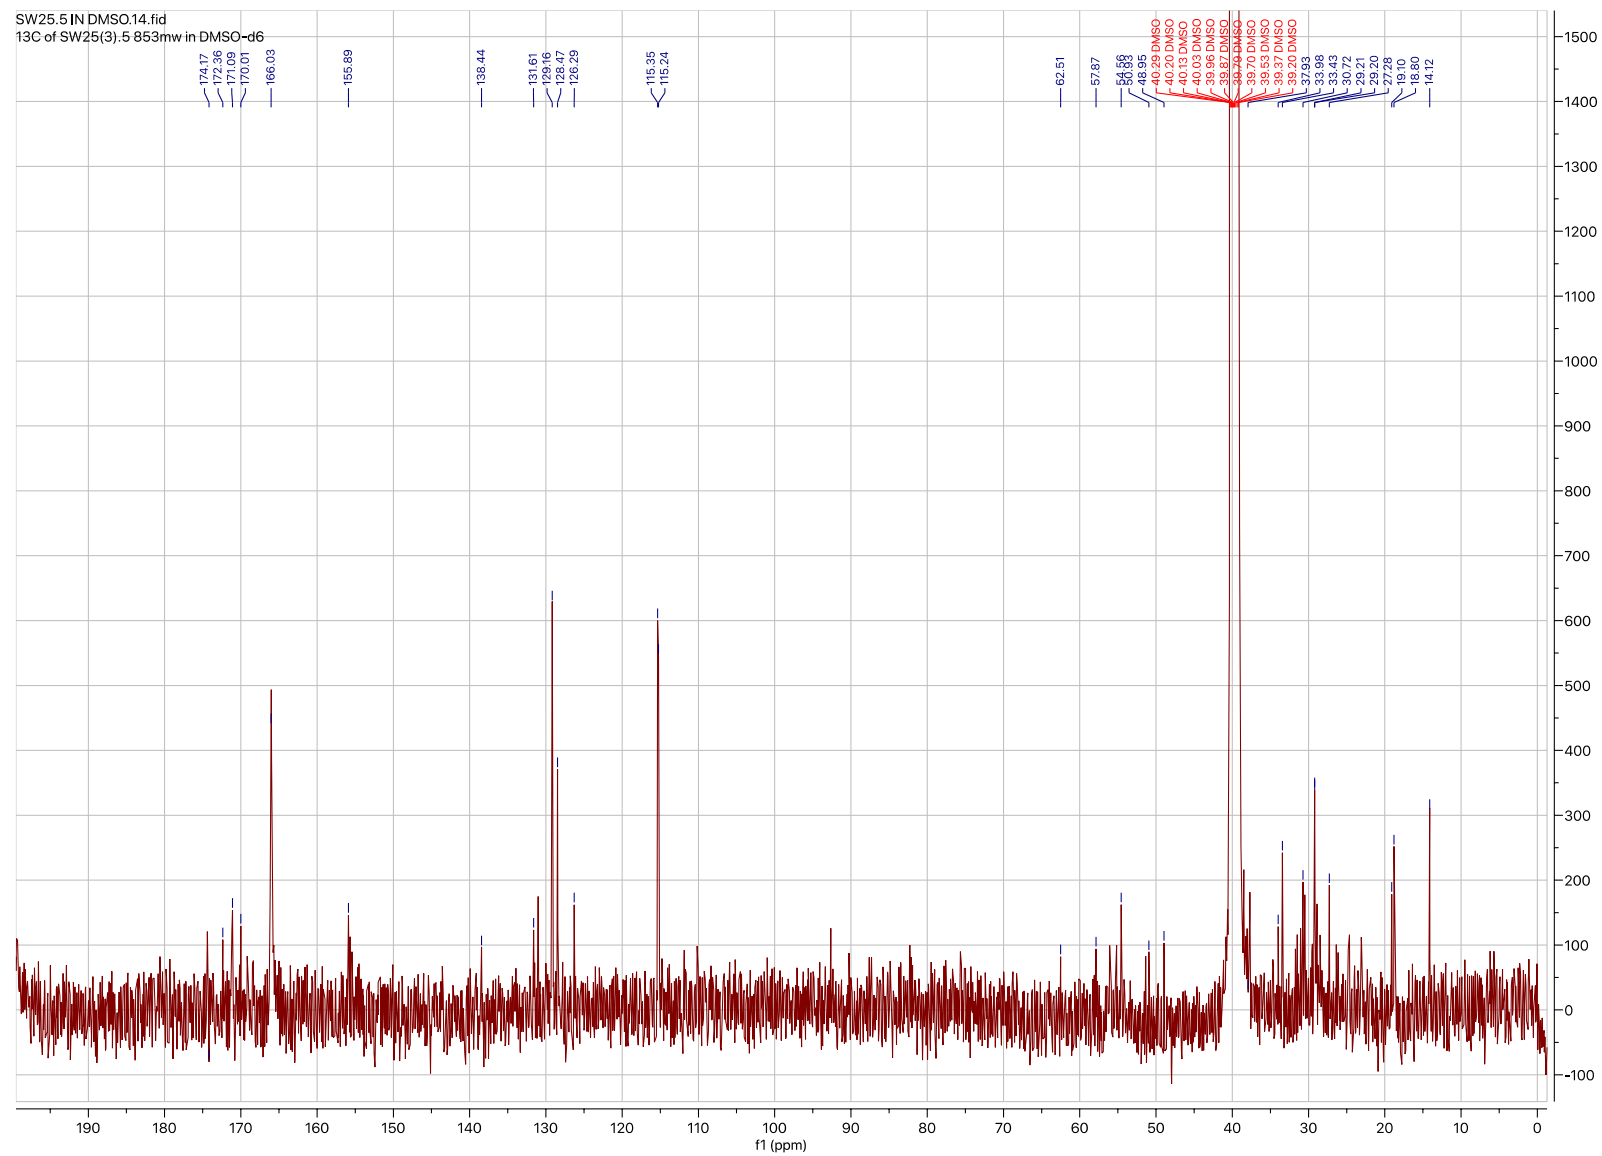



Figure S63. HSQC Spectrum of Hydanto-<sup>1</sup>[Dht]-anabaenopeptin A (**6**) in DMSO-*d*<sub>6</sub>

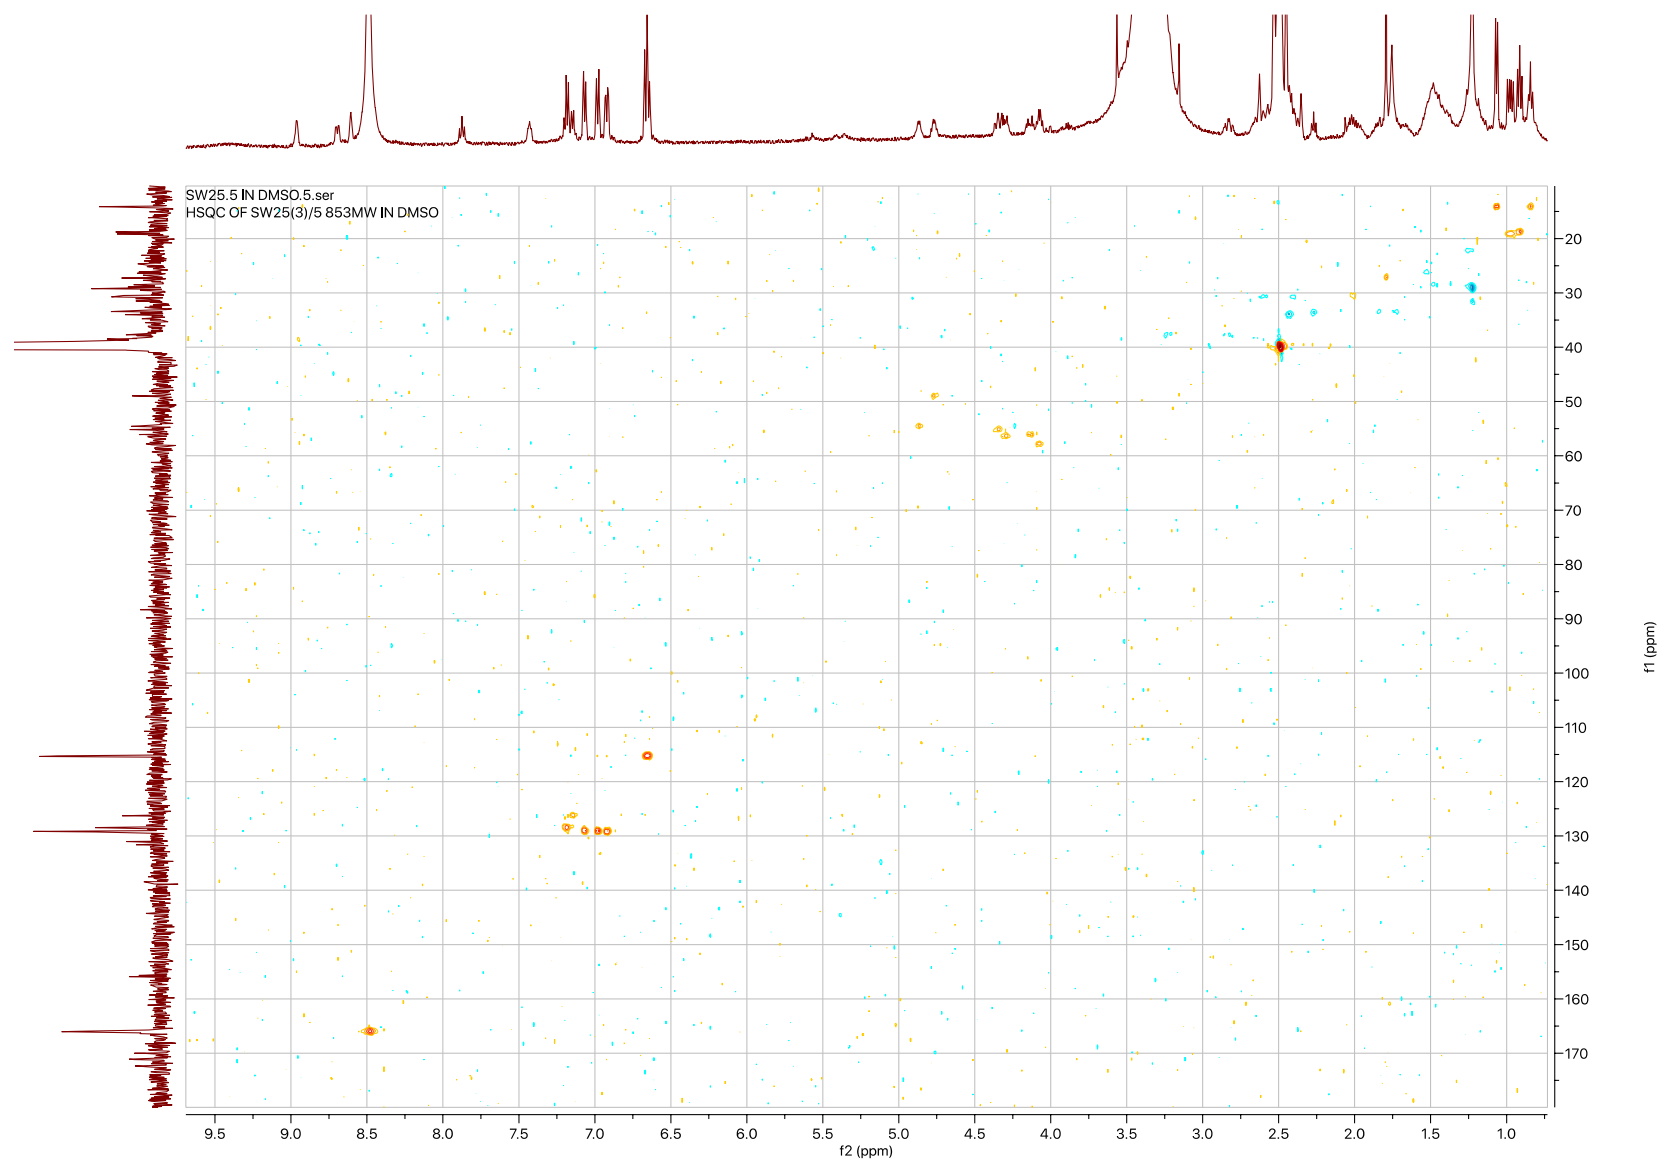

Figure S64. HMBC Spectrum of Hydanto-[Dht]-anabaenopeptin A (**6**) in DMSO-*d*<sub>6</sub>

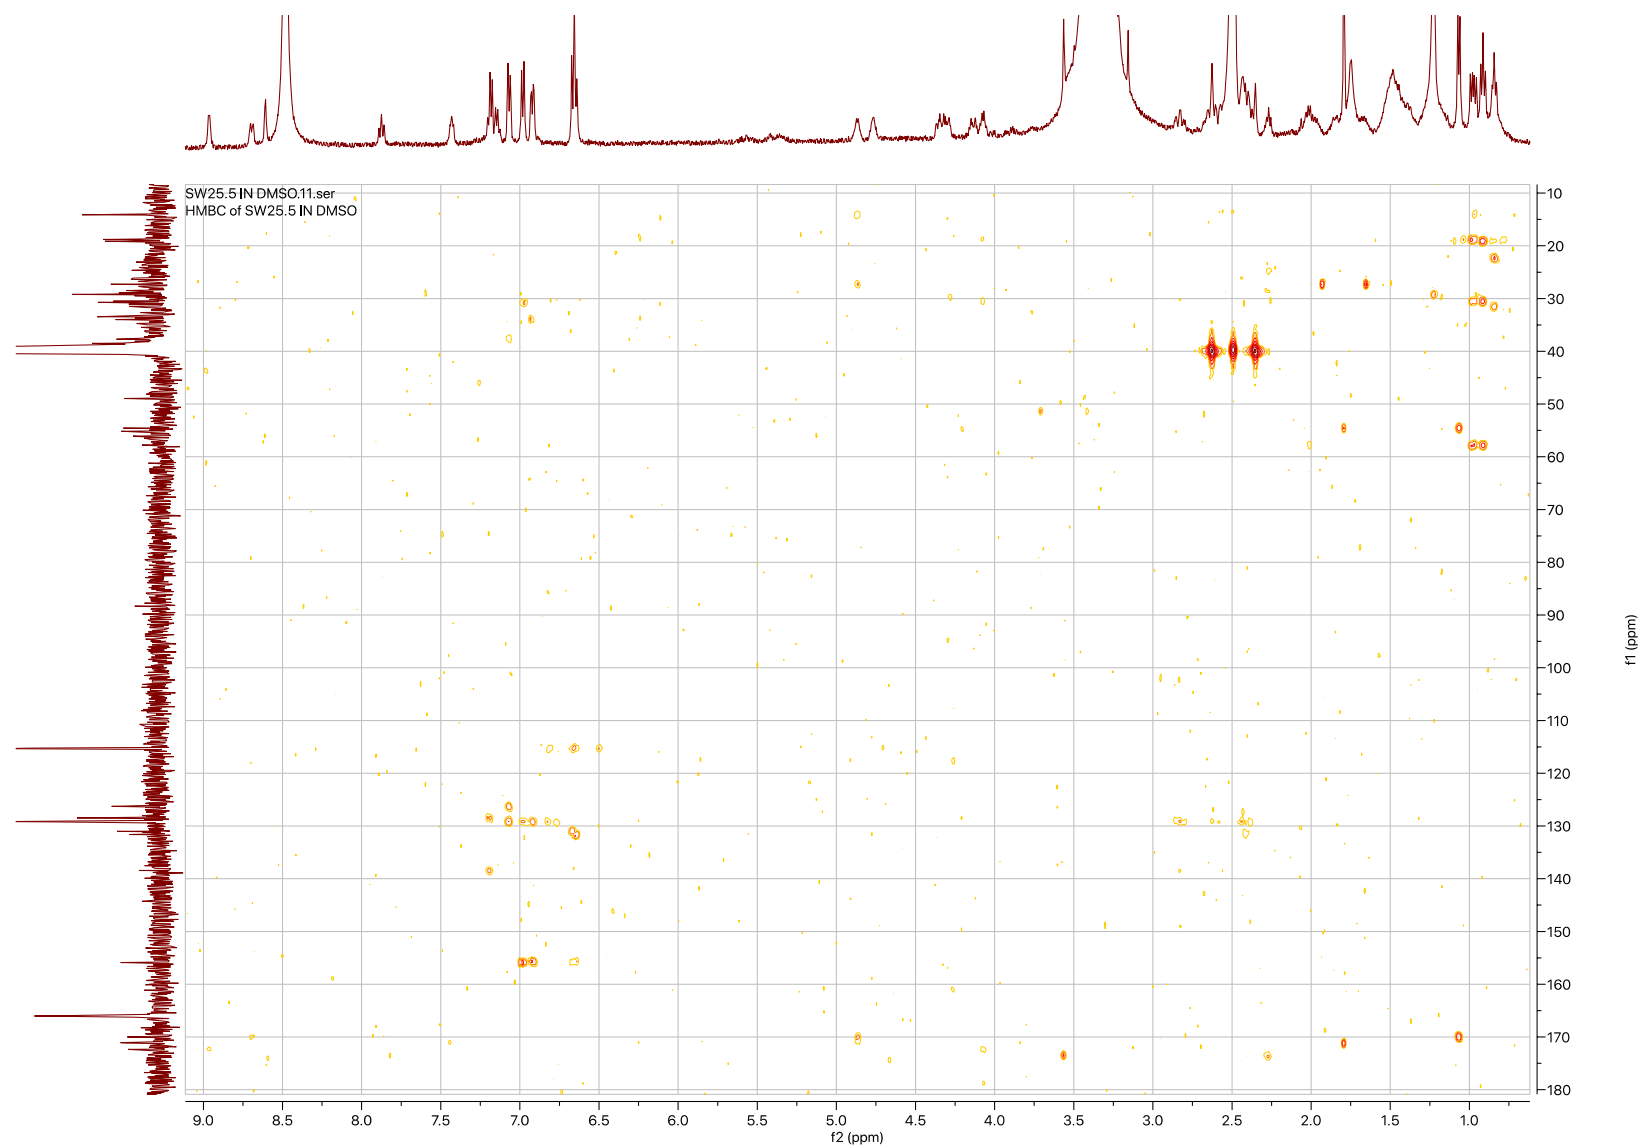

Figure S65. COSY Spectrum of Hydanto-<sup>1</sup>[Dht]-anabaenopeptin A (**6**) in DMSO-*d*<sub>6</sub>

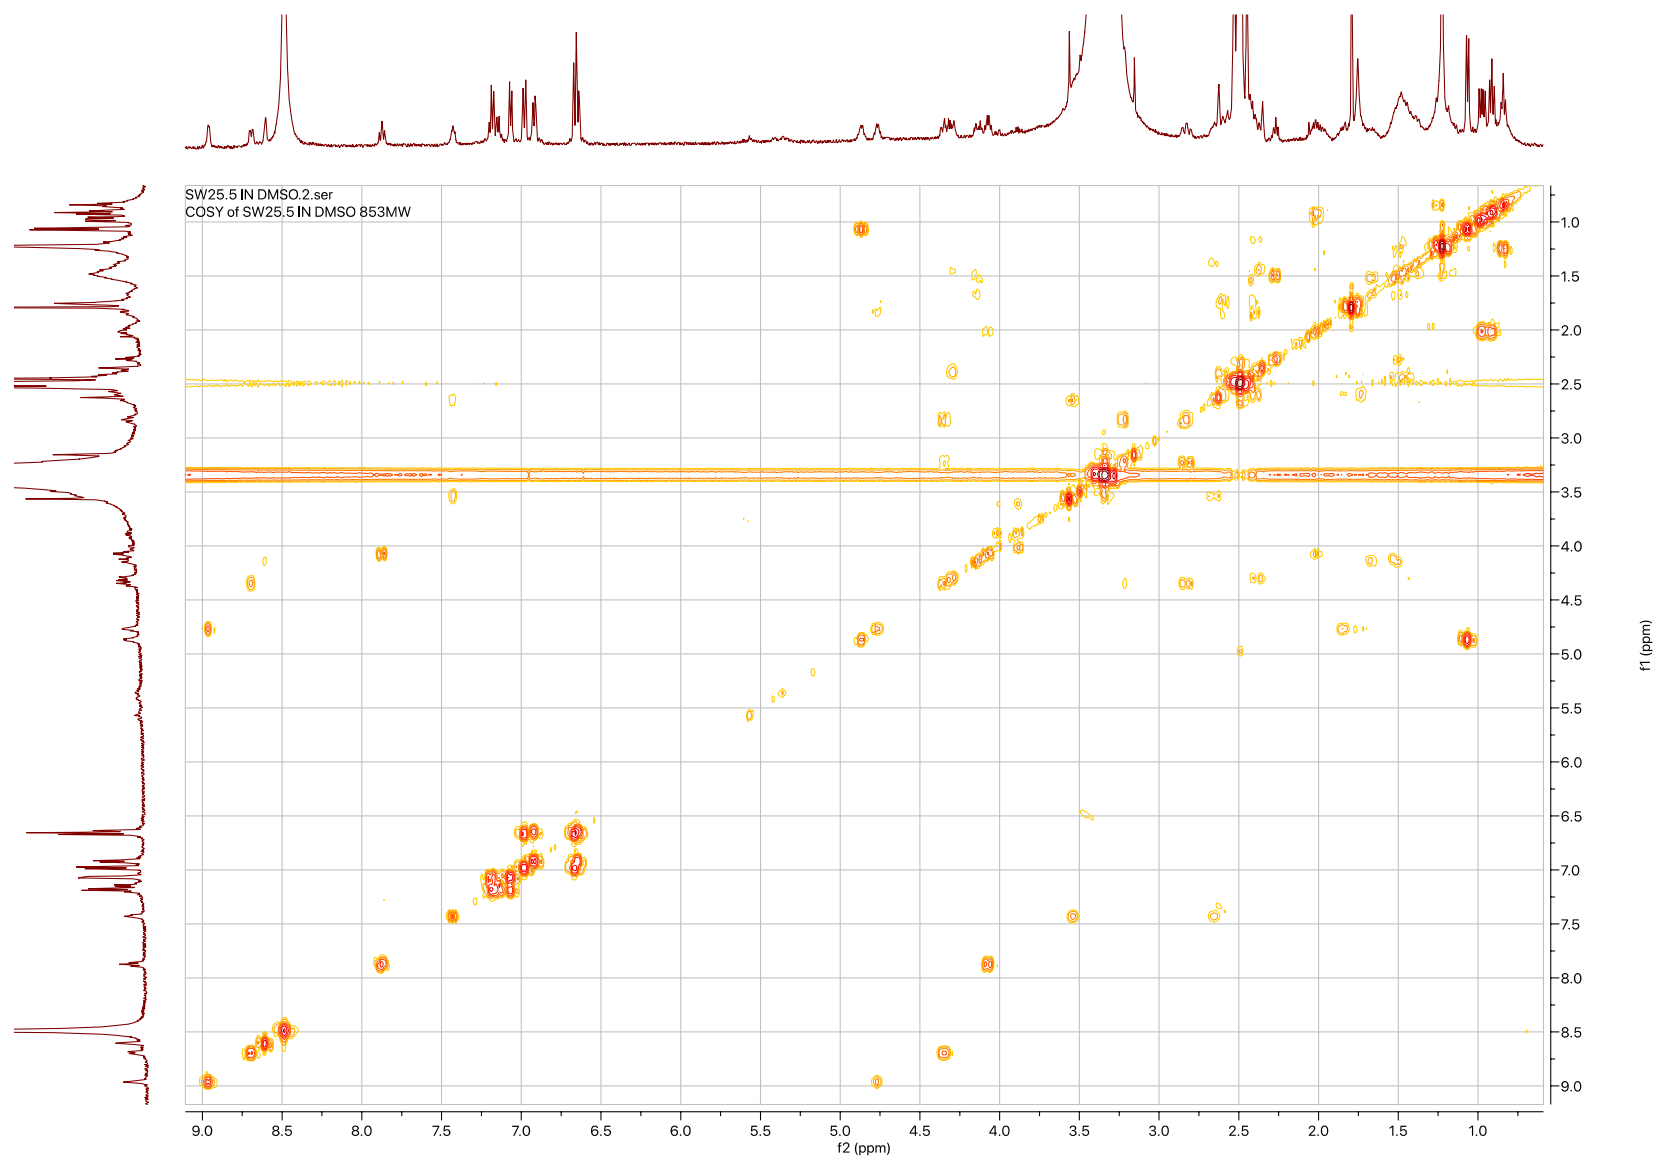

Figure S66. TOCSY Spectrum of Hydanto-<sup>6</sup>[Dht]-anabaenopeptin A (**6**) in DMSO-*d*<sub>6</sub>

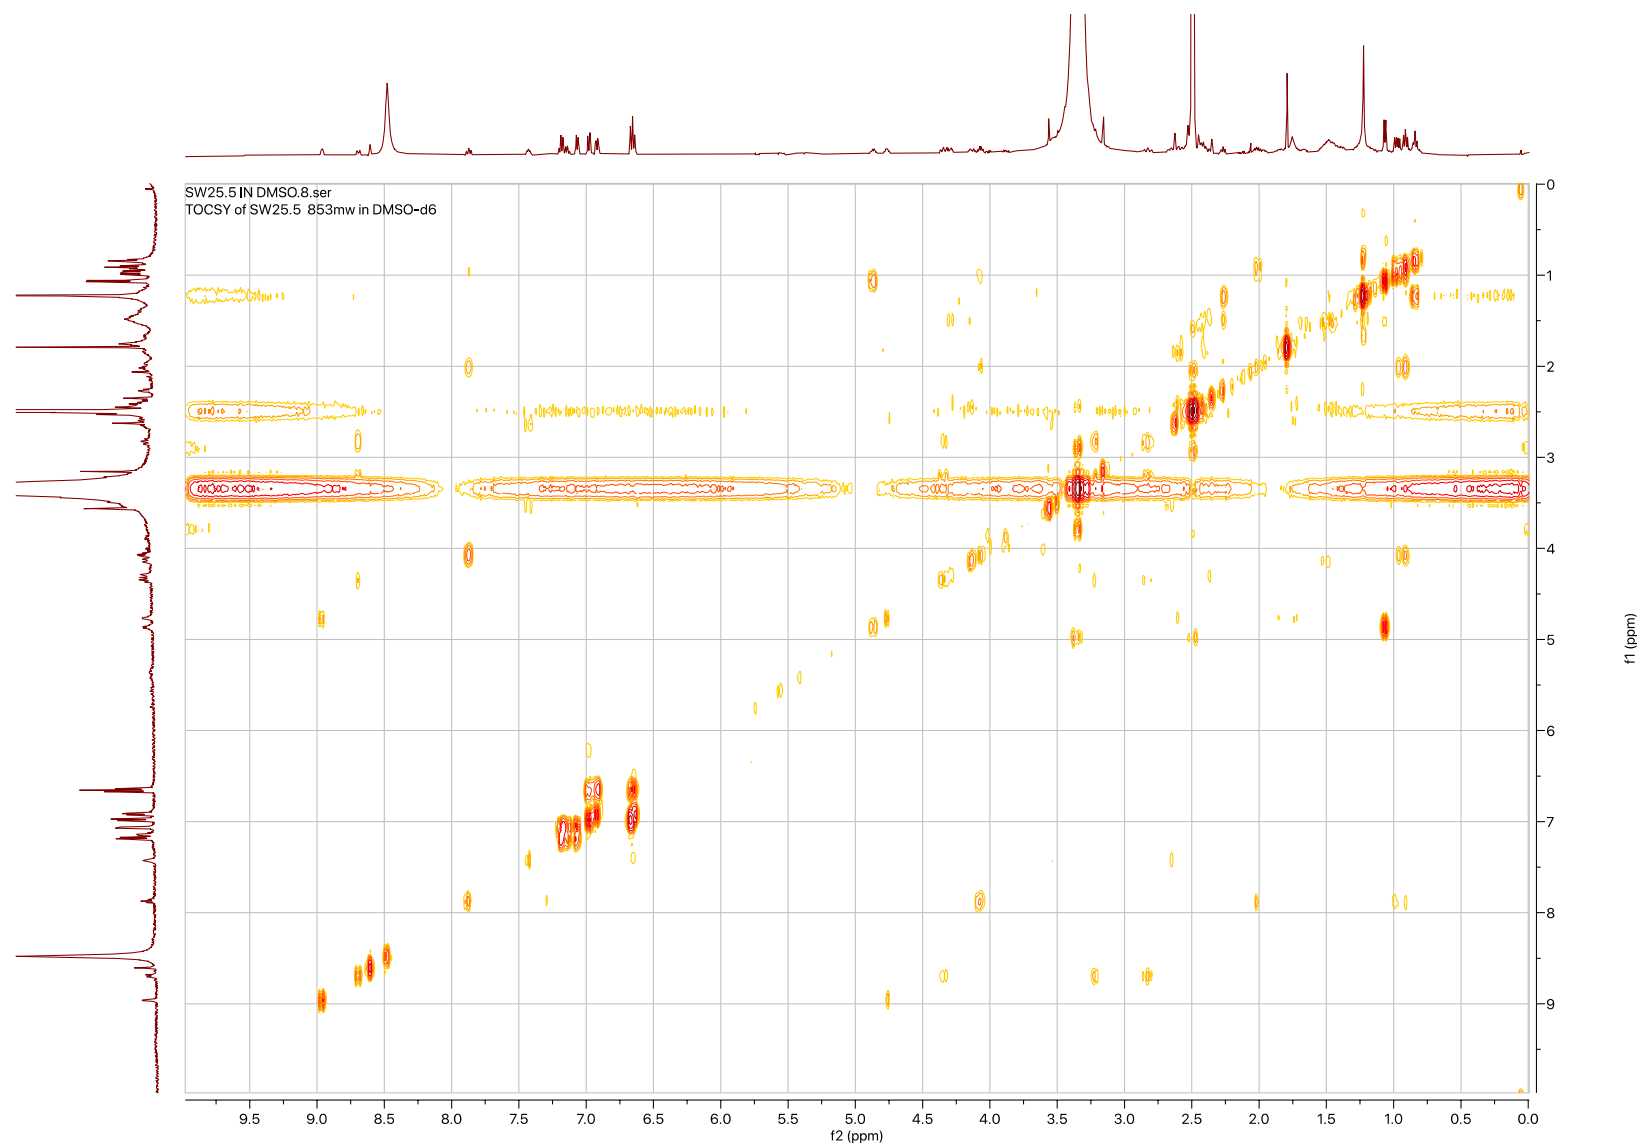

Figure S67. ROESY Spectrum of Hydanto-<sup>1</sup>[Dht]-anabaenopeptin A (**6**) in DMSO-*d*<sub>6</sub>

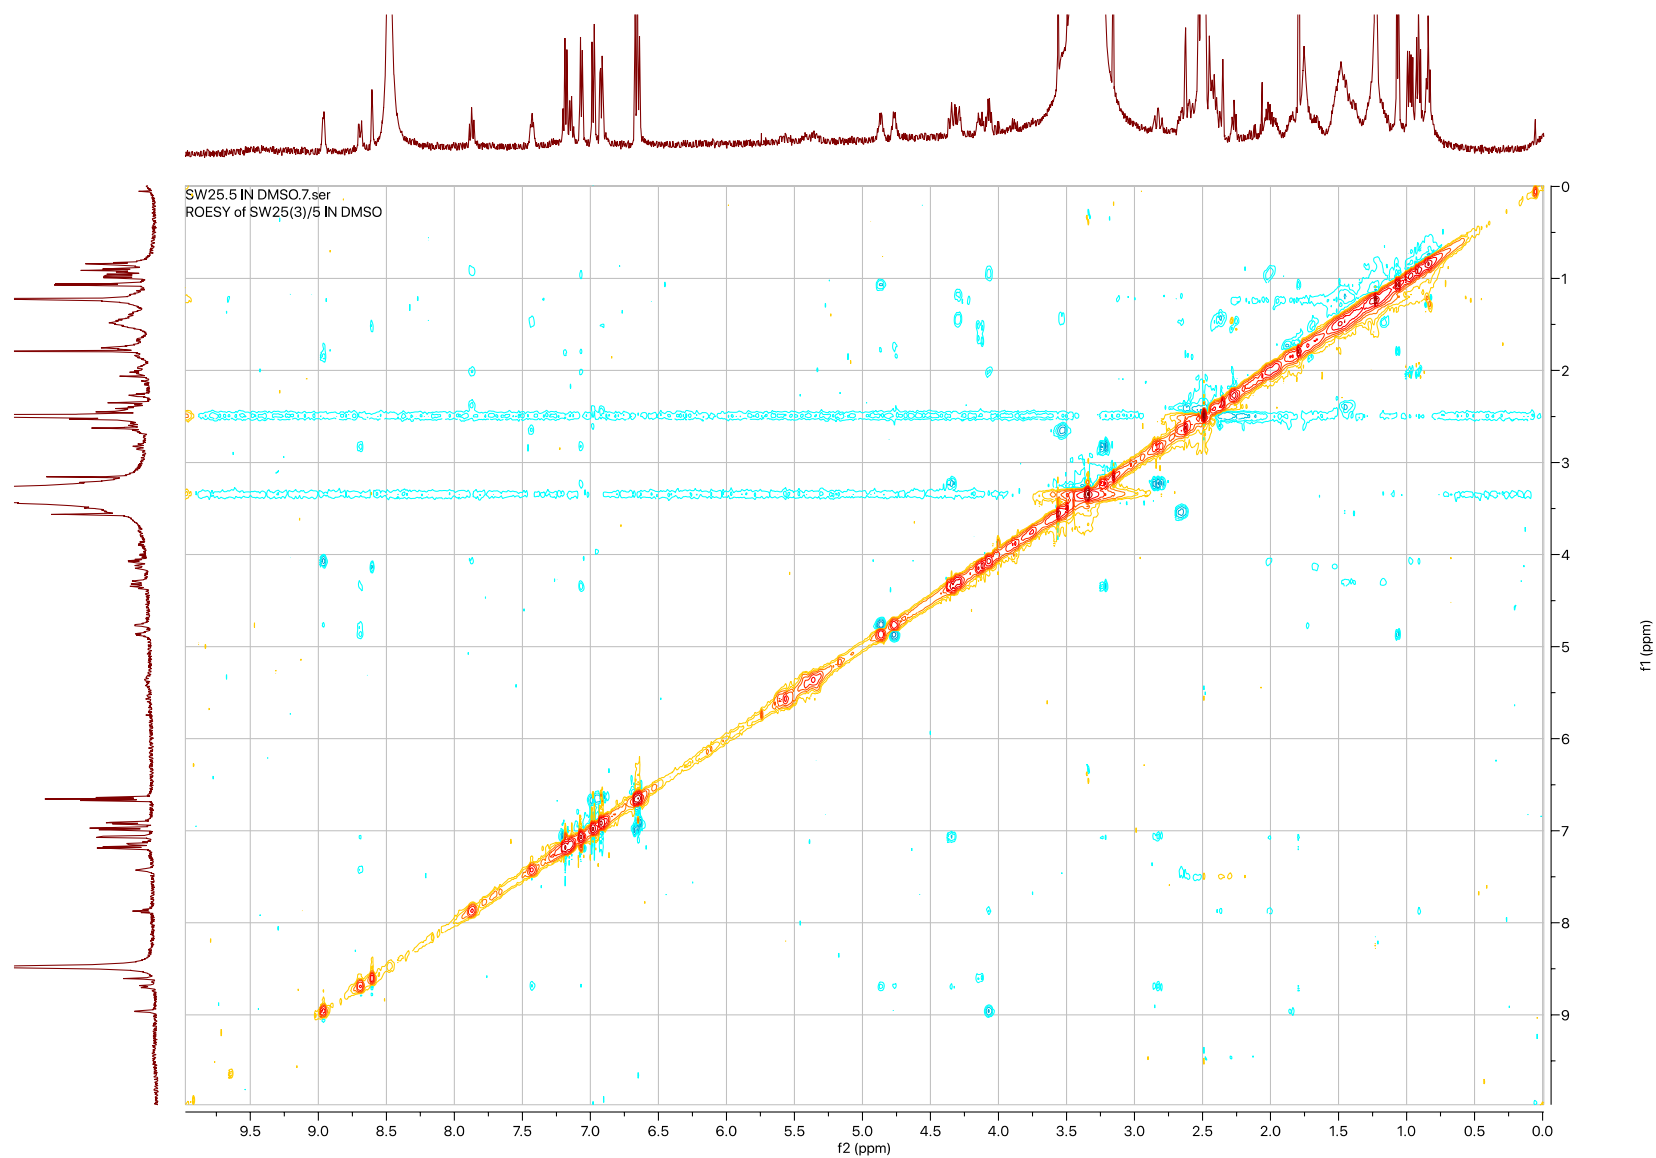

Figure S68. Positive HR ESI MS of Hydanto-<sup>1</sup>[Dht]-anabaenopeptin A (6)

**Single Mass Analysis**

Tolerance = 3.0 PPM / DBE: min = -1.5, max = 100.0

Element prediction: Off

Number of isotope peaks used for i-FIT = 3

Monoisotopic Mass, Odd and Even Electron Ions

461 formula(e) evaluated with 4 results within limits (up to 10 best isotopic matches for each mass)

Elements Used:

| Mass     | Calc. Mass | mDa  | PPM  | DBE  | Formula        | i-FIT | i-FIT Norm | Fit Conf % | C  | H  | N  | O |
|----------|------------|------|------|------|----------------|-------|------------|------------|----|----|----|---|
| 854.4464 | 854.4439   | 2.5  | 2.9  | 21.0 | C44 H58 N10 O8 | 892.2 | 0.414      | 66.10      | 44 | 58 | 10 | 8 |
|          | 854.4453   | 1.1  | 1.3  | 20.5 | C46 H60 N7 O9  | 893.1 | 1.365      | 25.54      | 46 | 60 | 7  | 9 |
|          | 854.4466   | -0.2 | -0.2 | 25.5 | C47 H56 N11 O5 | 894.3 | 2.569      | 7.66       | 47 | 56 | 11 | 5 |
|          | 854.4479   | -1.5 | -1.8 | 25.0 | C49 H58 N8 O6  | 896.7 | 4.948      | 0.71       | 49 | 58 | 8  | 6 |

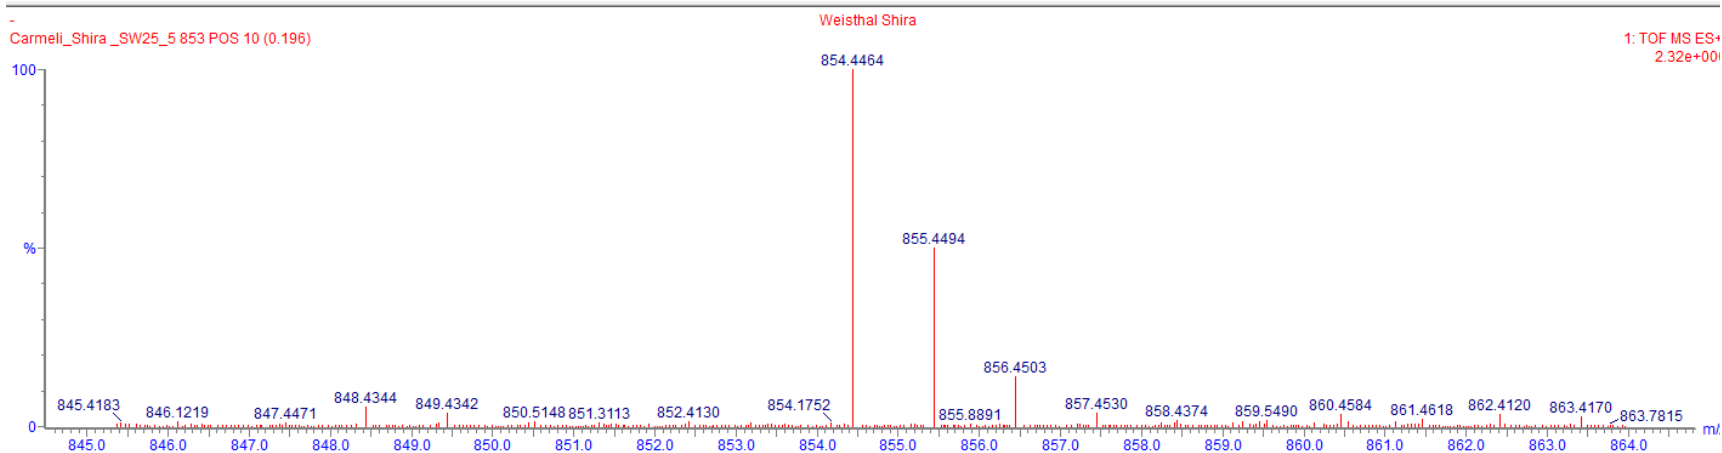

Figure S69. Positive HR ESI MS/MS Spectrum of Hydanto-<sup>1</sup>[Dht]-anabaenopeptin (6)

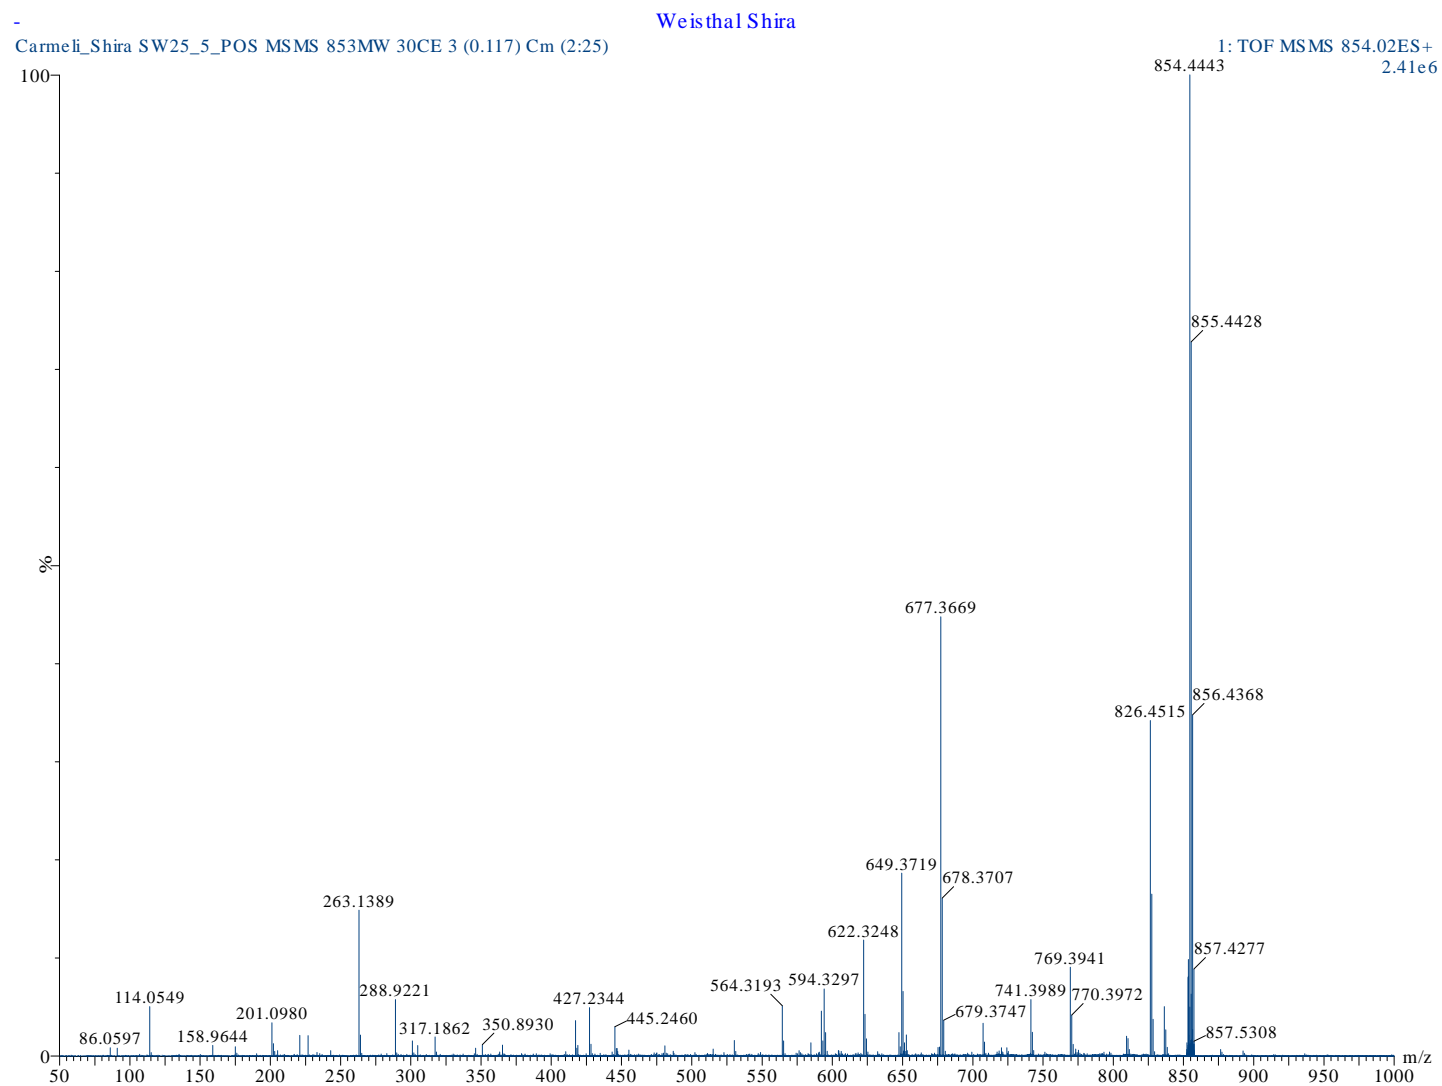

Figure S70. Scheme of Fragmentation in the Positive HR ESI MS/MS Spectrum of Hydanto-<sup>1</sup>[Dht]-anabaenopeptin (6)

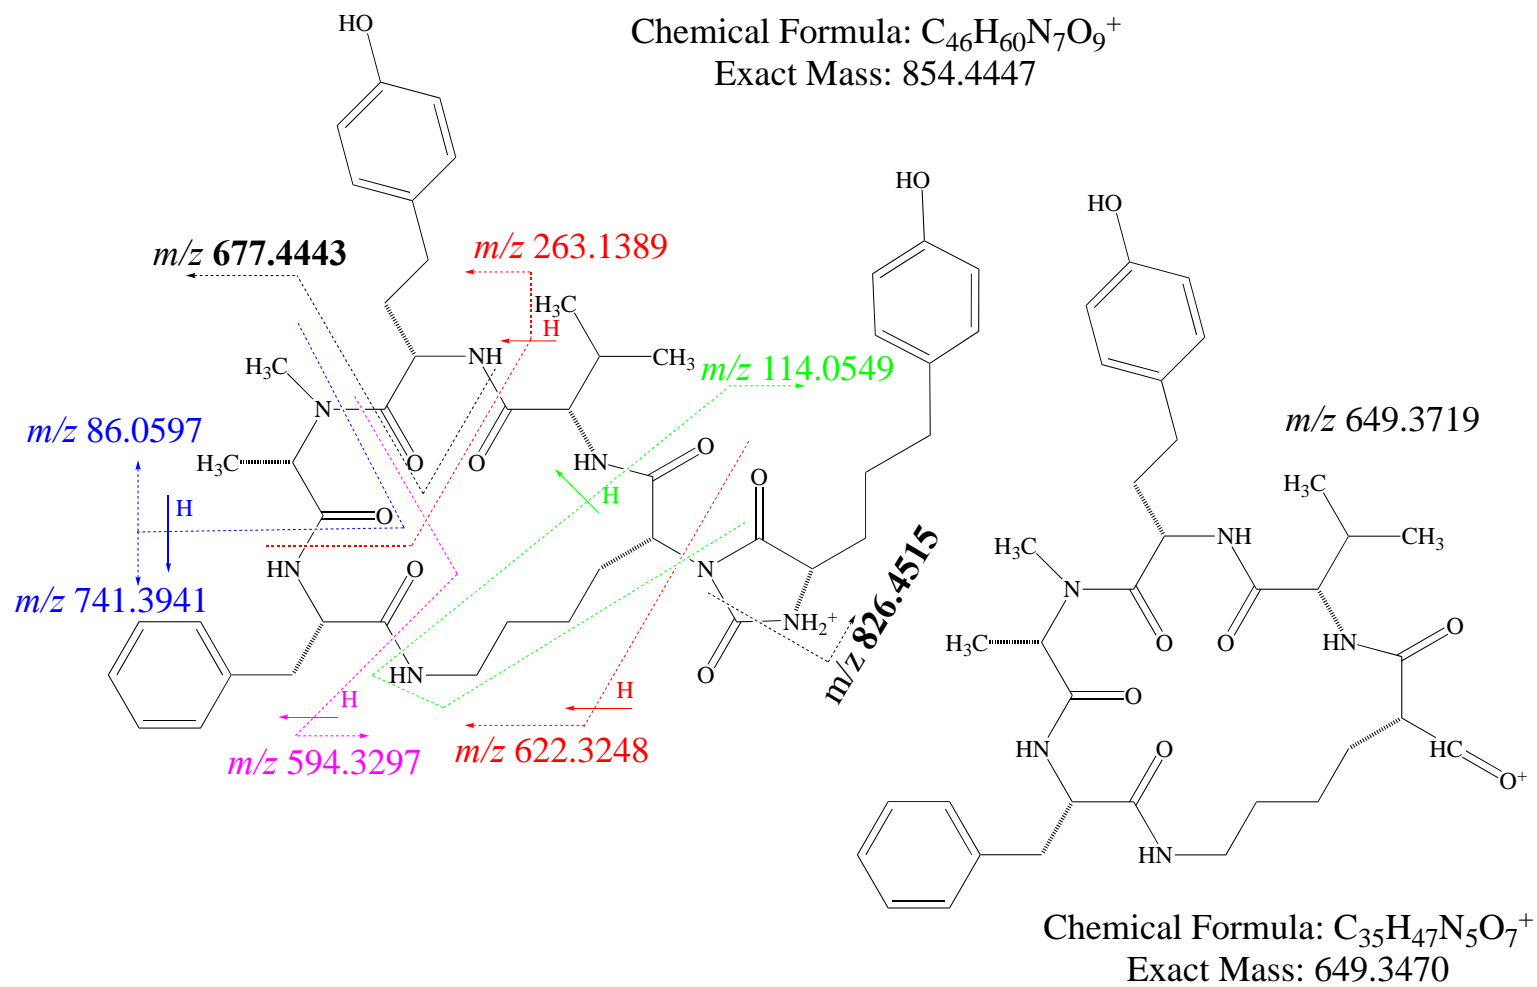



Figure S71. LCMS Traces of Marfey's Method Amino Acids Analysis of Hydanto-<sup>1</sup>[Dht]-anabaenopeptin (6)

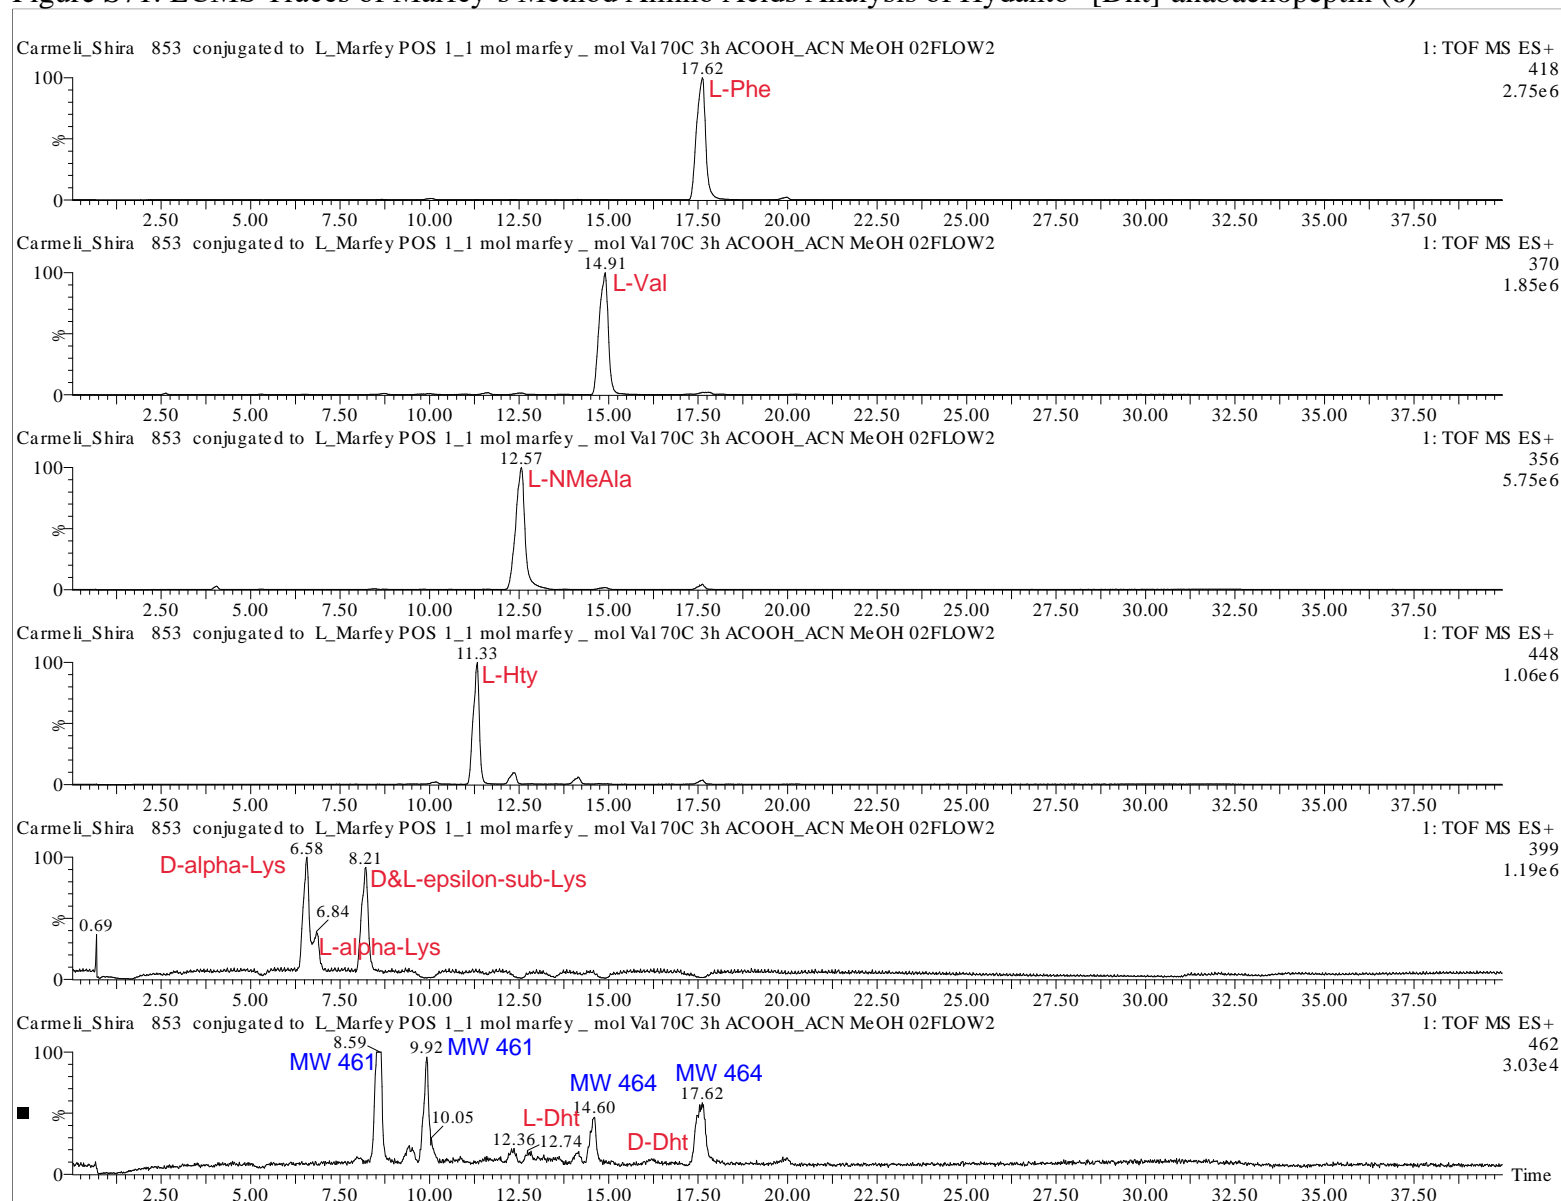

Table S6. NMR Data of Hydanto-<sup>1</sup>[Dht]-anabaenopeptin A (**6**) in DMSO-*d*<sub>6</sub>

| Position                          | δ <sub>C</sub> , Mult.                                     | δ <sub>H</sub> , Mult. ( <i>J</i> in Hz) <sup>b</sup> | HMBC correlations <sup>c</sup> | COSY correlations           | TOCSY correlations | ROESY correlations             |
|-----------------------------------|------------------------------------------------------------|-------------------------------------------------------|--------------------------------|-----------------------------|--------------------|--------------------------------|
| Dht-1<br><i>Dht-1</i>             | 174.0, C<br><i>174.1, C</i>                                |                                                       | Dht-2-NH                       |                             |                    |                                |
| Dht-2<br><i>Dht-2</i>             | 56.2, CH<br><i>56.1, CH</i>                                | 4.15, m<br>4.12, m                                    | Dht-2-NH, 4                    | Dht-3a,3b                   | Dht-3b             |                                |
| Dht-2-NH                          |                                                            | 8.61, brs                                             |                                |                             |                    | Dht-2                          |
| Dht-3a                            | 30.8, CH <sub>2</sub>                                      | 1.66, m                                               |                                | Dht-2,3b,4a, 4b             |                    | Dht-2                          |
| Dht-3b                            |                                                            | 1.50, m                                               |                                | Dht-2,3a                    |                    | Dht-2                          |
| Dht-4a<br>Dht-4b<br><i>Dht-4</i>  | 28.9, CH <sub>2</sub><br><br><i>28.7, CH<sub>2</sub></i>   | 1.48, m<br>1.45, m                                    |                                | Dht-3a,5<br>Dht-3a,5        |                    |                                |
| Dht-5                             | 34.0, CH <sub>2</sub>                                      | 2.42, m                                               | Dht-8,8'                       | Dht-4a,4b                   |                    |                                |
| Dht-6                             | 131.6, C                                                   |                                                       | Dht-3, 7,7'                    |                             |                    |                                |
| Dht-7,7'<br><i>Dht-7,7'</i>       | 129.3, CH<br><i>129.2, CH</i>                              | 6.92, d (8.5)<br><i>6.92, d (8.5)</i>                 | Dht-3,7',7                     | Dht-8,8'<br><i>Dht-8,8'</i> |                    | Dht-3, 8,8'<br><i>Dht-8,8'</i> |
| Dht-8,8'<br><i>Dht-8,8'</i>       | 115.2, CH<br><i>x2</i>                                     | 6.65, d (8.5)<br><i>6.65, d (8.5)</i>                 | Dht-8',8                       | Dht-7,7'<br><i>Dht-7,7'</i> |                    | Dht-7,7'<br><i>Dht-7,7'</i>    |
| Dht-9                             | 155.9, C                                                   |                                                       | Dht-7,7',8,8'                  |                             |                    |                                |
| CO<br><i>CO</i>                   | 156.9, C<br><i>157.0, C</i>                                |                                                       | Lys-2, Dht-2<br><i>Lys-2</i>   |                             |                    |                                |
| Lys-1                             | 168.4, C<br><i>168.2, C</i>                                |                                                       | Lys-2                          |                             |                    |                                |
| Lys-2<br><i>Lys-2</i>             | 56.5, CH<br><i>56.3, CH</i>                                | 4.31, m<br><i>4.29, m</i>                             |                                | Lys-3a,3b                   | Lys-3a,5b          | Lys-4a,4b, 5b                  |
| Lys-3a<br>Lys-3b<br><i>Lys-3a</i> | 29.6, CH <sub>2</sub> ,<br><br><i>29.5, CH<sub>2</sub></i> | 2.39, m<br>1.44, m                                    |                                | Lys-2,4a, 4b                |                    | Lys-2                          |
| Lys-4a<br>Lys-4b                  | 23.1, CH <sub>2</sub>                                      | 1.45, m<br>1.17, m                                    |                                | Lys-4b Lys-4a               |                    | Lys-2<br>Lys-2                 |

|          |                       |                  |                 |                 |                     |                        |
|----------|-----------------------|------------------|-----------------|-----------------|---------------------|------------------------|
| Lys-5a   | 28.6, CH <sub>2</sub> | 1.48, m          |                 | Lys-6b          |                     |                        |
| Lys-5b   | 28.5, CH <sub>2</sub> | 1.38, m          |                 |                 |                     |                        |
| Lys-6a   | 38.5, CH <sub>2</sub> | 3.53, m          |                 | Lys-6b, 6-NH    | Lys-6-NH            | 2.65, Lys-4a 1.38      |
| Lys-6b   |                       | 2.65, m          |                 | Lys-5b,6a,6-NH  | Lys-6-NH            | Lys-6a                 |
| Lys-6-NH |                       | 7.43, t (6.4)    |                 | Lys-6a,6b       | Lys-6a,6b           | Phe-2,2-NH, Lys-6a,6b  |
| Val-1    | 172.4, C              |                  | Hty-2-NH, Val-2 |                 |                     |                        |
| Val-2    | 57.9, CH              | 4.08, t (7.6)    | Val-4,5         | Val-2-NH, 3     | Val-2-NH, 3,4,5     | Val-3,4,5              |
| Val-2    | 57.7, CH              | 4.07, t (7.6)    | Val-4,5         | Val-2-NH, 3     |                     |                        |
| Val-2-NH |                       | 7.88, d (8.2)    |                 | Val-2           | Val-2,3,4,5         | Val-2,3,5, Lys-3a      |
| Val-2-NH |                       | 7.86, d (7.9)    |                 | Val-2           |                     | Val-2,5                |
| Val-3    | 30.5, CH              | 2.01, m          | Val-2-NH,4,5    | Val-2,4,5       | Val-2-NH            |                        |
| Val-4    | 19.2, CH <sub>3</sub> | 0.99, d (7.1)    | Val-5           |                 | Val-2-NH            |                        |
| Val-4    | 19.1, CH <sub>3</sub> | 0.96, d (7.5)    |                 |                 |                     |                        |
| Val-5    | 18.8, CH <sub>3</sub> | 0.92, d (6.9)    | Val-4           |                 | Val-2-NH            |                        |
| Val-5    |                       | 0.90, d (6.7)    |                 |                 |                     |                        |
| Hty-1    | 171.2, C              |                  | NMe-Ala-2,NMe   |                 |                     |                        |
| Hty-2    | 49.0, CH              | 4.77, m          |                 | Hty-2-NH,3a, 3b | Hty-2-NH,3a, 3b,4a, | NMe-Ala-2, 1 Hty-3a,3b |
| Hty-2-NH |                       | 8.96, brs        |                 | Hty-2           | Hty-2               | Hty-2,3a, 3b, Val-2    |
| Hty-3a   | 33.4, CH <sub>2</sub> | 1.85, m          |                 | Hty-2,3b,4a, 4b |                     |                        |
| Hty-3b   |                       | 1.72, m          |                 | Hty-2,3a,4a,4b  |                     |                        |
| Hty-4a   | 30.7, CH <sub>2</sub> | 2.60, m          | Hty-2-NH        | Hty-3a,3b, 4b   |                     |                        |
| Hty-4b   |                       | 2.40, m          |                 | Hty-3a,3b, 4a   |                     | Hty-6,6'               |
| Hty-5    | 131.0, C              |                  | Hty-4b,7,7'     |                 |                     |                        |
| Hty-6,6' | 129.2, CH x2          | 6.98, d x2 (8.5) | Hty-4a,4b       |                 |                     | Hty-7,7'               |
| Hty-7,7' | 115.4, CH x2          | 6.66, d x2 (8.5) | Hty-7',7        |                 |                     | Hty-2-NH               |
| Hty-8    | 155.7, C              |                  | Hty-7,7'        |                 |                     |                        |

|                                   |                       |                                                              |                       |                                      |                 |                                                |
|-----------------------------------|-----------------------|--------------------------------------------------------------|-----------------------|--------------------------------------|-----------------|------------------------------------------------|
| NMe-Ala-1                         | 170.0, C              |                                                              | Phe-2-NH, NMe-Ala-2,3 |                                      |                 |                                                |
| NMe-Ala-2                         | 54.6, CH              | 4.87, q (6.7)                                                | NMe-Ala-3, NMe        | NMe-Ala-3                            | NMe-Ala-3       | Phe-2-NH, Lys-6-NH, Hty-2, NMe-Ala-3           |
| NMe-Ala-3                         | 14.1, CH <sub>3</sub> | 1.06, d (6.7)                                                | NMe-Ala-2             | NMe-Ala-2                            |                 |                                                |
| NMe-Ala-Me                        | 27.3, CH <sub>3</sub> | 1.79, s                                                      | NMe-Ala-2             |                                      |                 | Phe-2-NH, Phe-6,6'                             |
| Phe-1                             | 171.1, C              |                                                              | Lys-6-NH              |                                      |                 |                                                |
| Phe-2<br><i>Phe-2</i>             | 55.2, CH              | 4.35, ddd (12.2, 8.7, 3.2)<br><i>4.31, m</i>                 | Phe-3b                | Phe-2-NH, 3a,3b<br><i>Phe-3b</i>     | Phe-2-NH,3a, 3b | Phe-3a                                         |
| Phe-2-NH<br><i>Phe-2-NH</i>       |                       | 8.69, d (8.3)<br><i>8.69, d (9.0)</i>                        |                       | Phe-2<br><i>Phe-2</i>                | Phe-2,3a,3b     | Lys-6-NH, Phe-2,3b,5, 5', Hty-2, NMe-Ala-2,NMe |
| Phe-3a<br>Phe-3b<br><i>Phe-3b</i> | 37.7, CH <sub>2</sub> | 3.23, m<br>2.81, dd (13.3,3.9)<br><i>2.84, dd (13.3,3.9)</i> | Phe-5,5'              | Phe-2,3b<br>Phe-2,3a<br><i>Phe-2</i> |                 | Phe-2,3a, 3b                                   |
| Phe-4                             | 138.4, C              |                                                              | Phe-3b,6,6'           |                                      |                 |                                                |
| Phe-5,5'                          | 129.1, CH             | 7.07, d x2 (7.4)                                             | Phe-3b,5',5           |                                      |                 | Phe-2, 2-NH,3a,3b, Val-3,4,5, NMe-Ala-Me,      |
| Phe-6,6'                          | 128.5, CH             | 7.19, t x2 (7.4)                                             | Phe-6',6              |                                      |                 | NMe-Ala-Me                                     |
| Phe-7                             | 126.3, CH             | 7.14, t (7.4)                                                | Phe-5,5'              |                                      |                 |                                                |

<sup>a</sup>500 MHz for <sup>1</sup>H and 125 MHz for <sup>13</sup>C. <sup>b</sup>From HSQC correlations. <sup>c</sup>*J*<sub>C-H</sub>=8 Hz.

Figure S72. LCMS Chromatogram and Mass spectrum of Hydanto-<sup>1</sup>[Dht]-anabaenopeptin A (6)

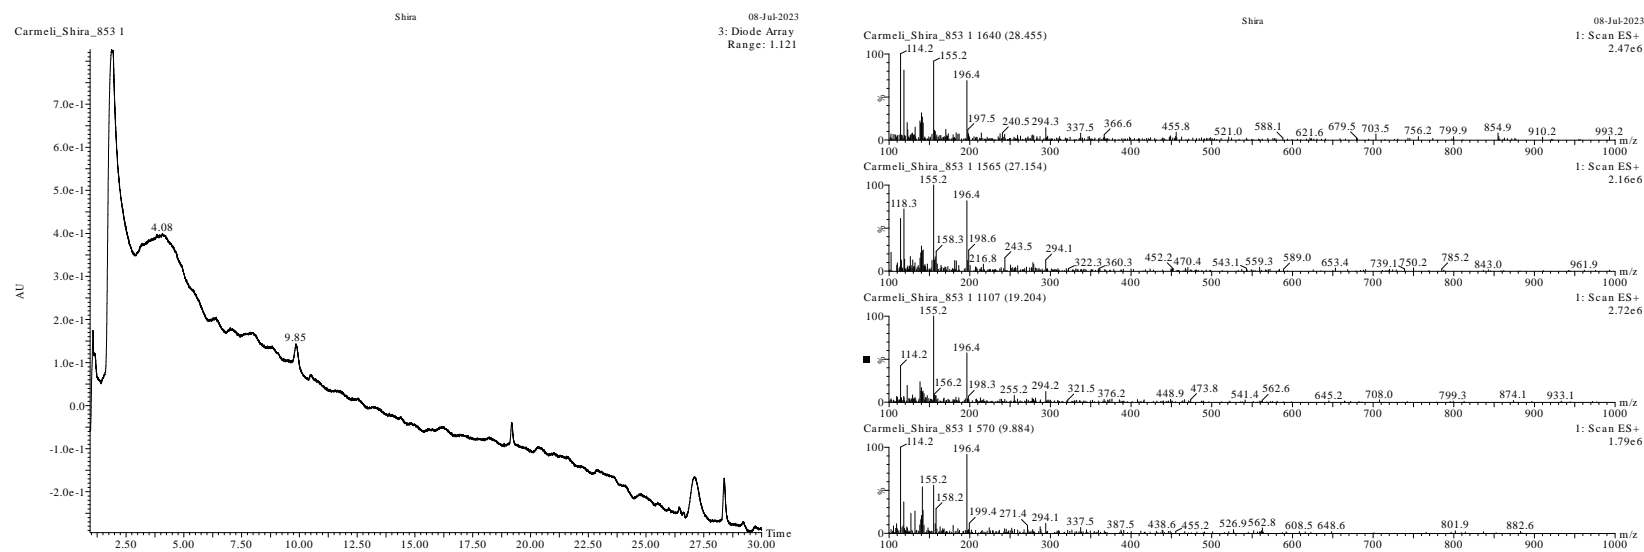

Figure S73.  $^1\text{H}$  NMR Spectrum of Anabaenopeptin A (**7**) in  $\text{DMSO}-d_6$

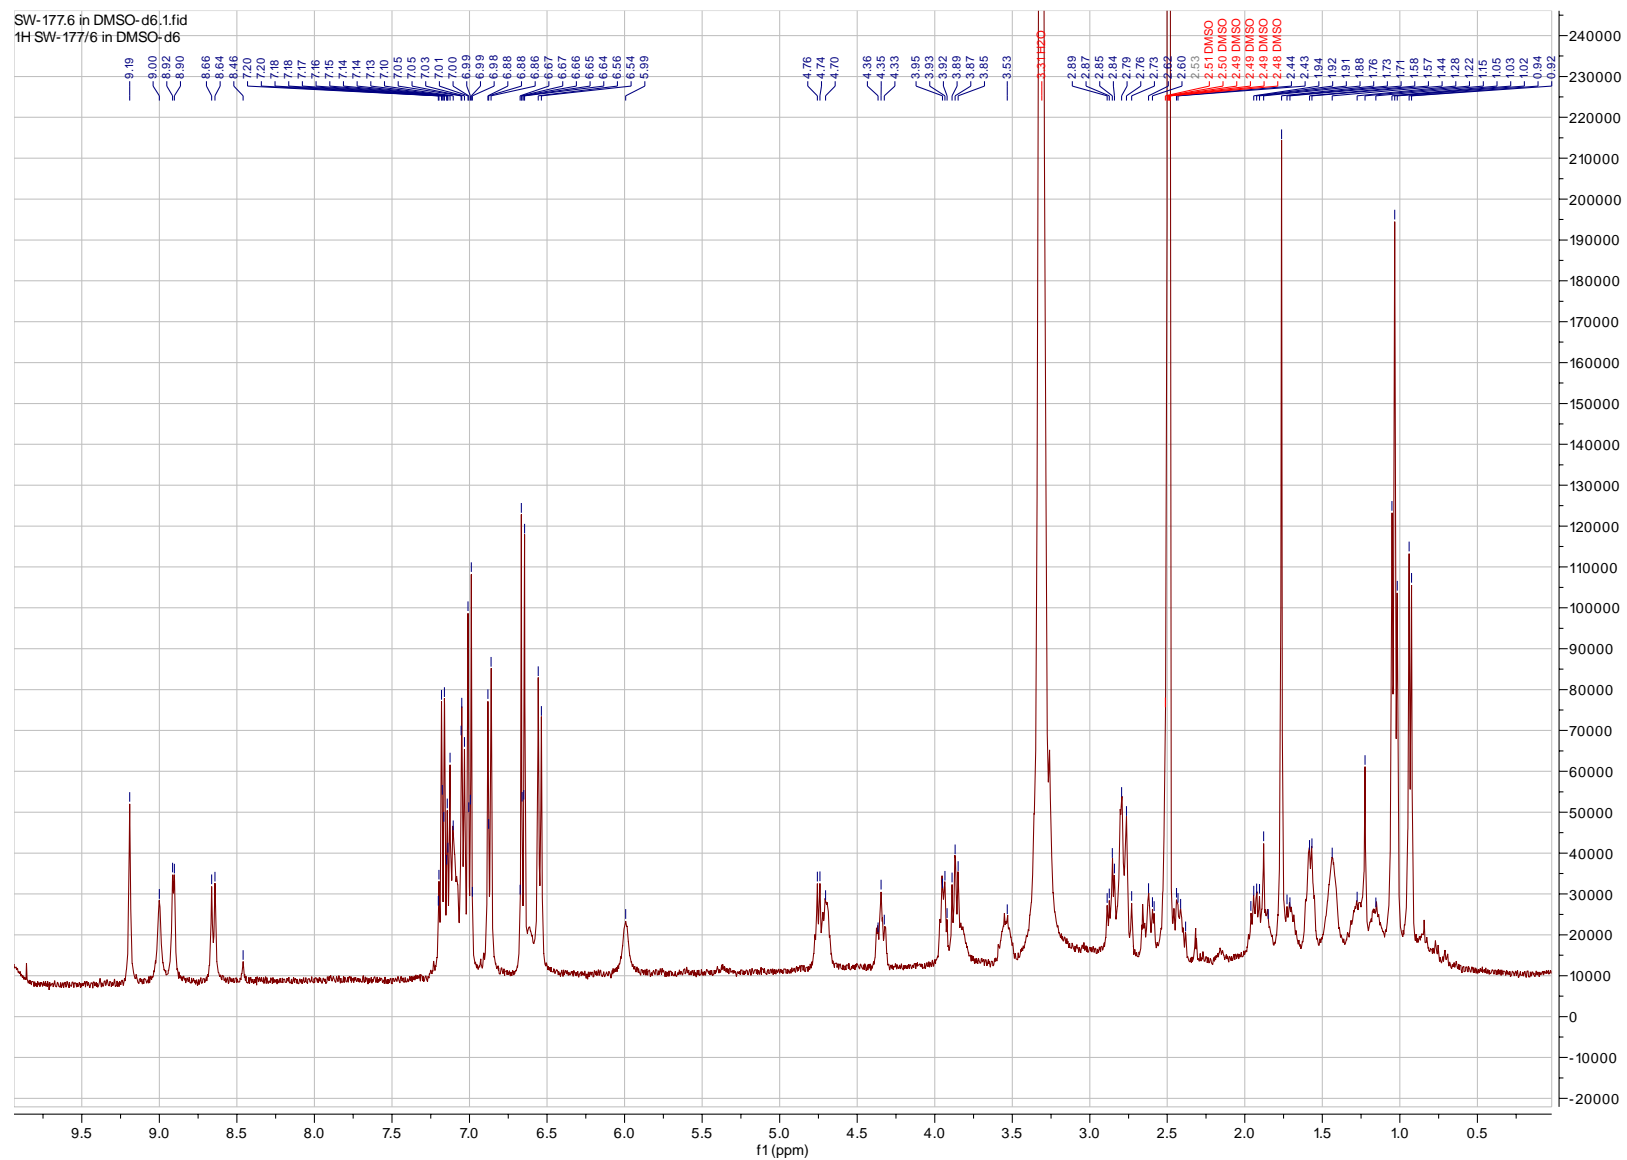

Figure S74.  $^{13}\text{C}$  NMR Spectrum of Anabaenopeptin A (**7**) in  $\text{DMSO-}d_6$

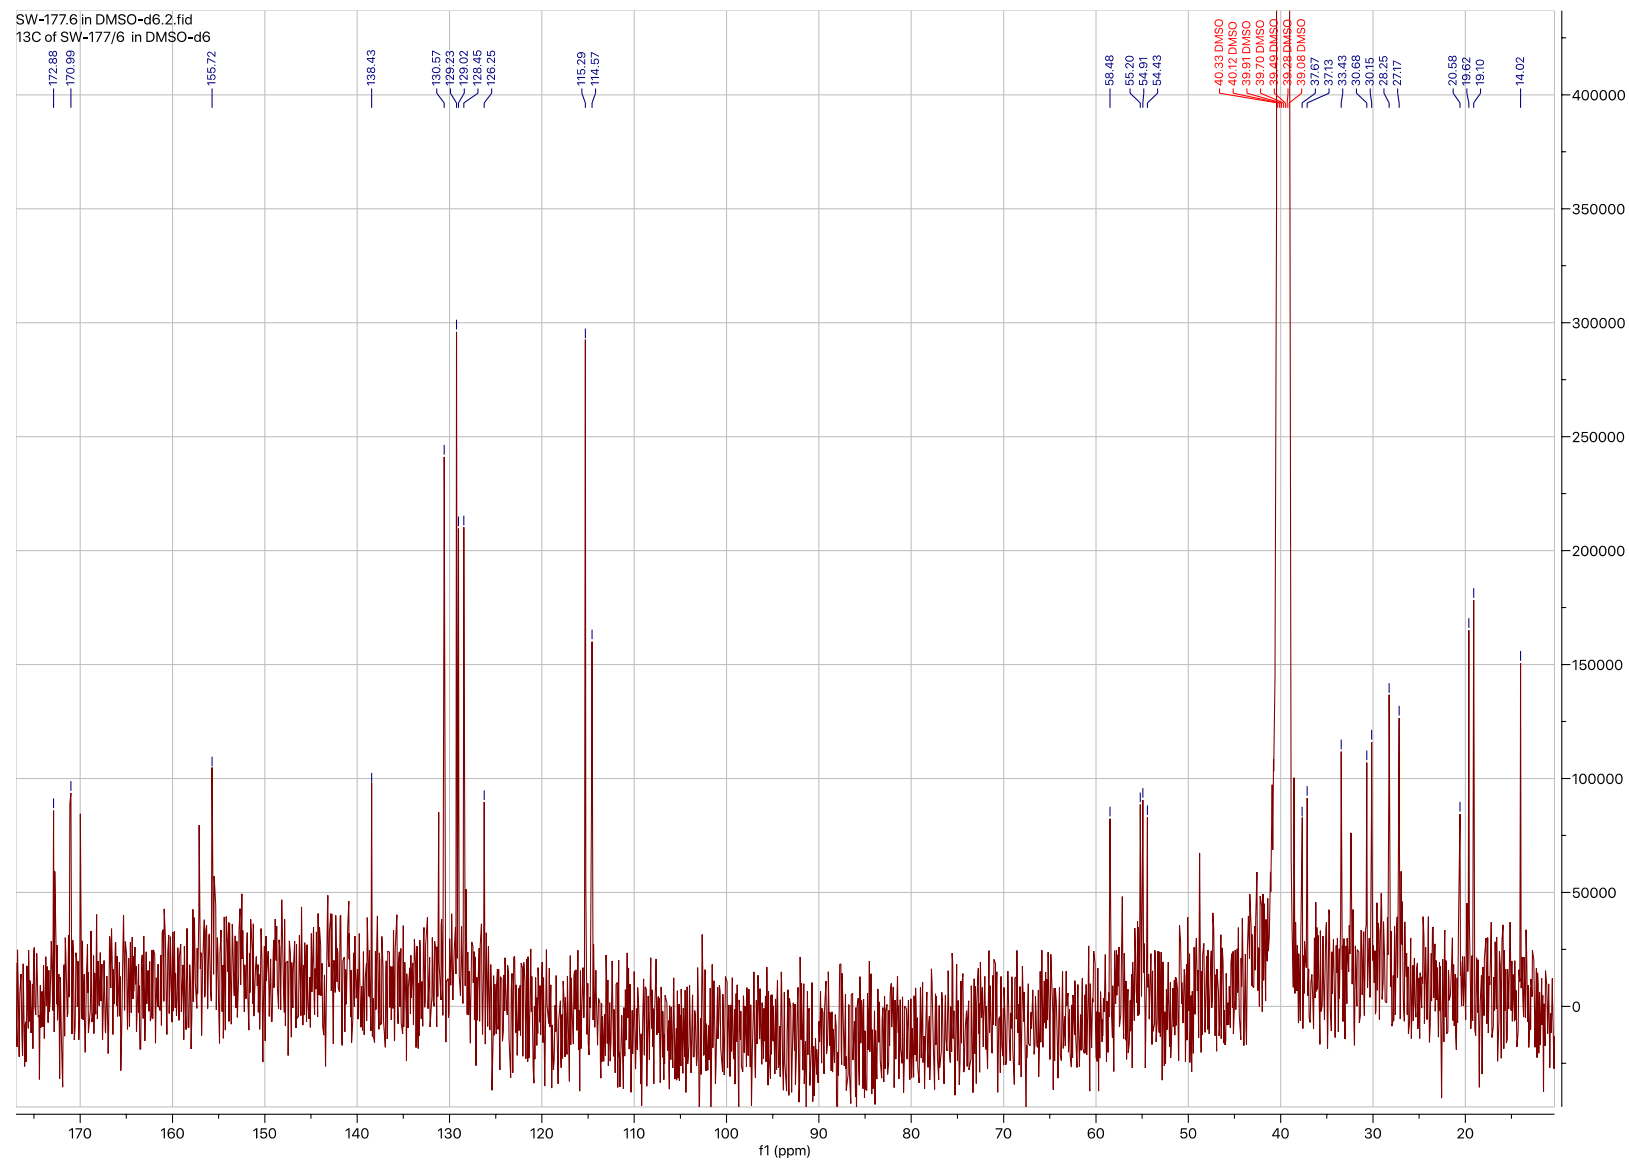

Figure S75. Negative HR ESI MS of Anabaenopeptin A (7)

**Single Mass Analysis**

Tolerance = 3.0 PPM / DBE: min = -1.5, max = 50.0

Element prediction: Off

Number of isotope peaks used for i-FIT = 3

Monoisotopic Mass, Even Electron Ions

479 formula(e) evaluated with 2 results within limits (all results (up to 1000) for each mass)

Elements Used:

| Mass     | Calc. Mass | mDa  | PPM  | DBE  | Formula        | i-FIT | i-FIT Norm | Fit Conf % | C  | H  | N  | O  |
|----------|------------|------|------|------|----------------|-------|------------|------------|----|----|----|----|
| 842.4099 | 842.4102   | -0.3 | -0.4 | 25.5 | C45 H52 N11 O6 | 543.4 | 1.463      | 23.14      | 45 | 52 | 11 | 6  |
|          | 842.4089   | 1.0  | 1.2  | 20.5 | C44 H56 N7 O10 | 542.2 | 0.263      | 76.86      | 44 | 56 | 7  | 10 |

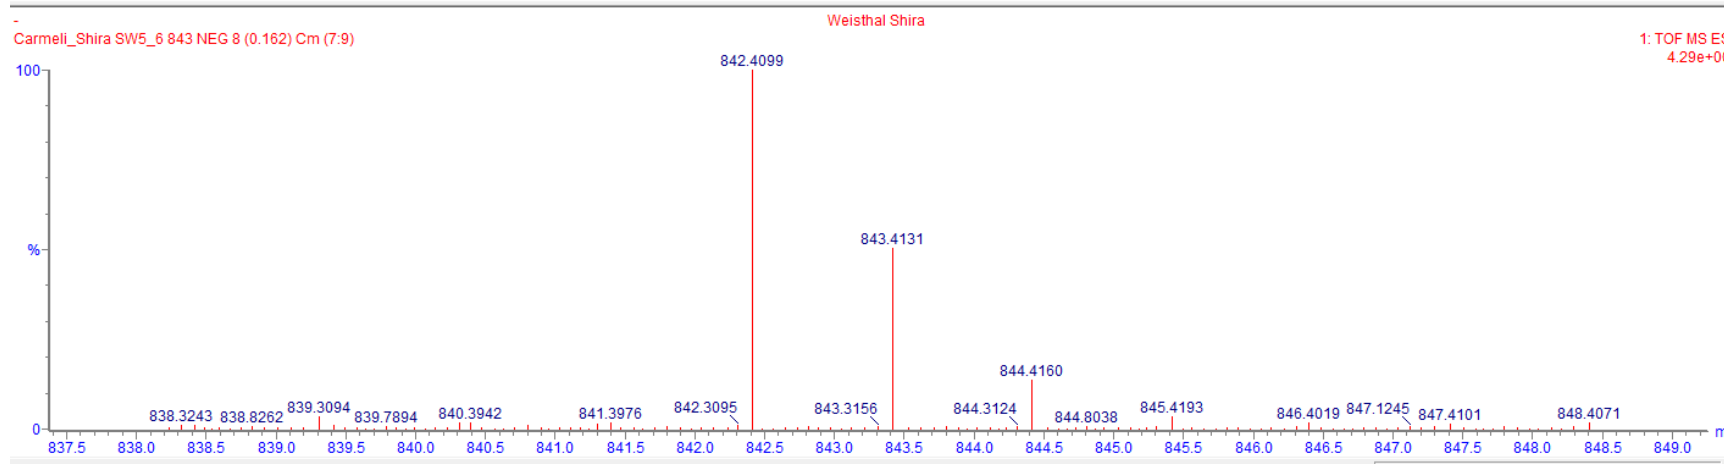



Figure S76. Positive HR ESI MS/MS Spectrum of Anabaenopeptin A (7)

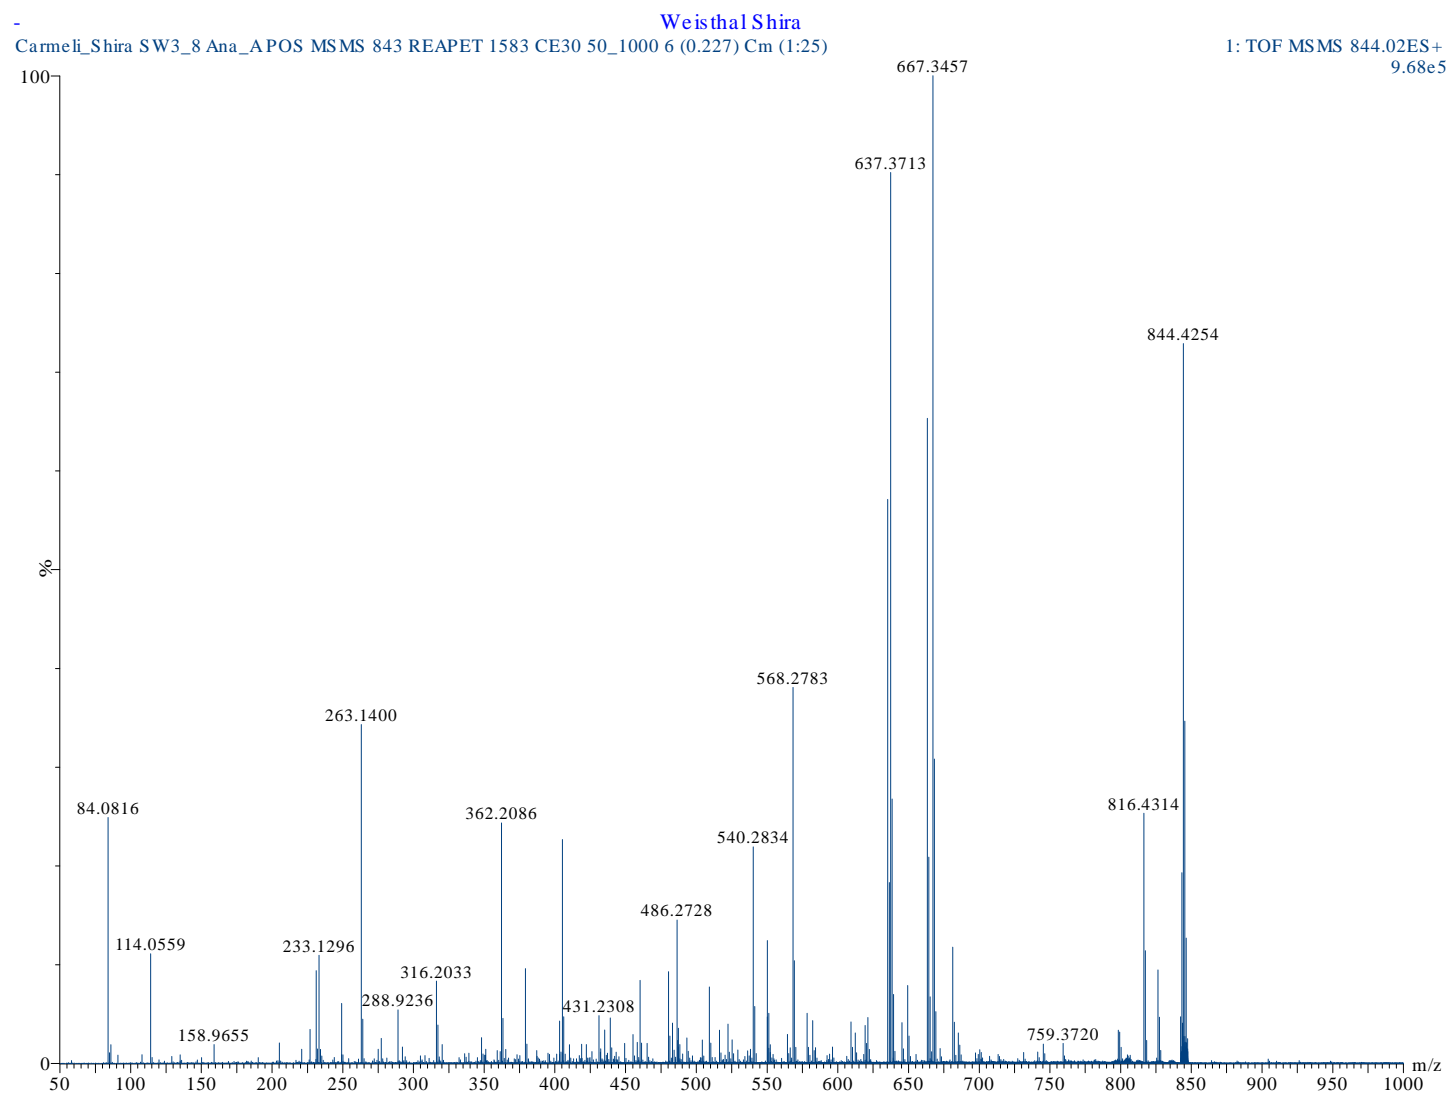

Figure S77. Scheme of Fragmentation in the Positive HR ESI MS/MS Spectrum of Anabaenopeptin A (7)

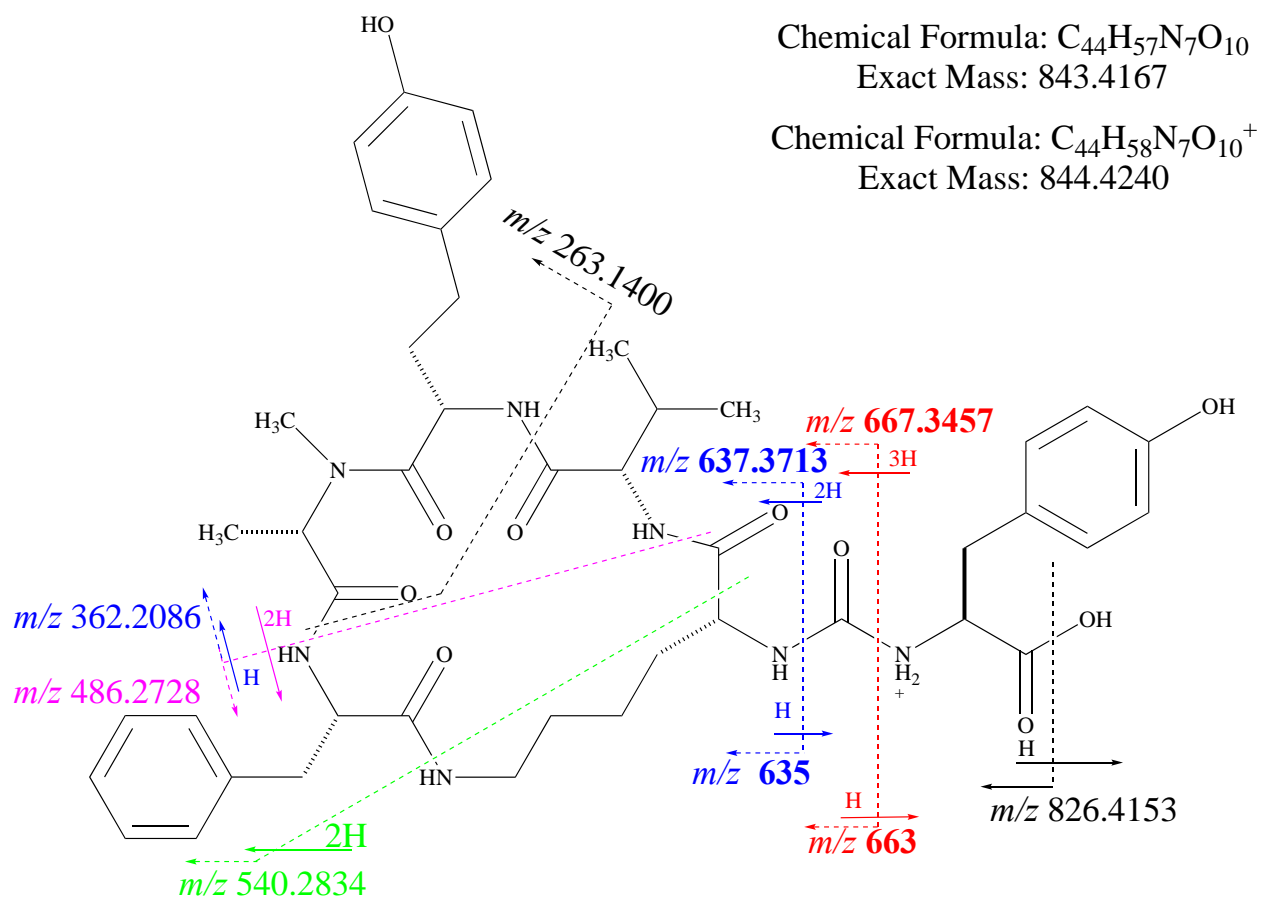

Figure S78. LCMS Traces of Marfey's Method Amino Acids Analysis of Anabaenopeptin A (7)

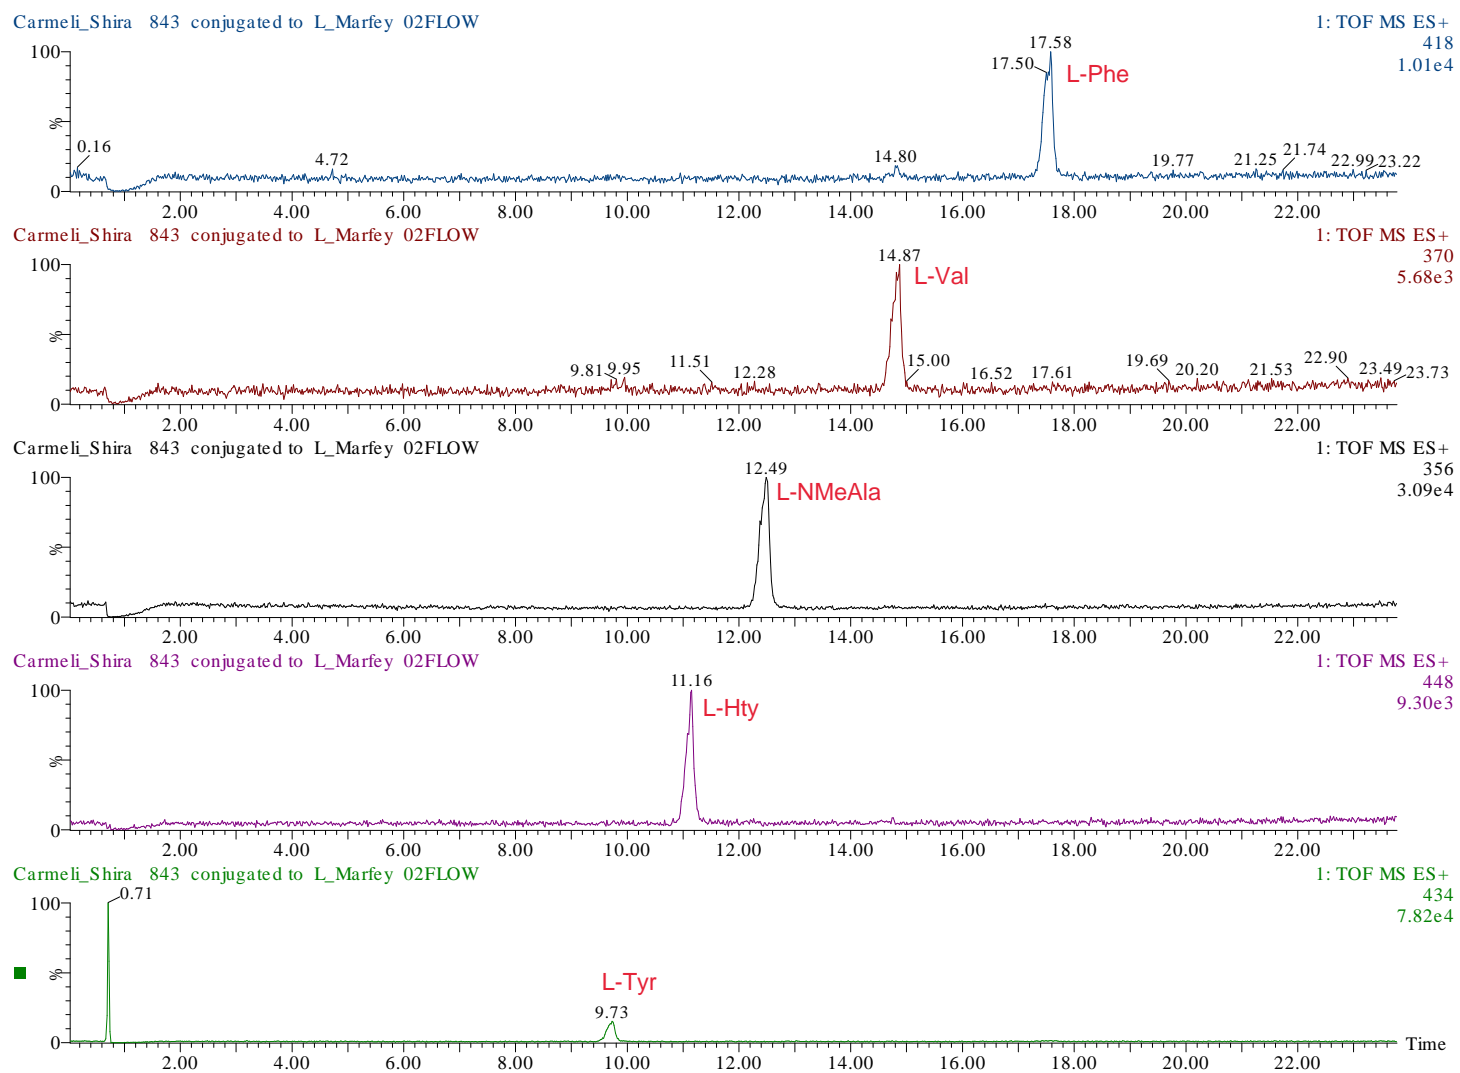

Figure S79. LCMS Chromatogram and Mass spectrum of Anabaenopeptin A (7)

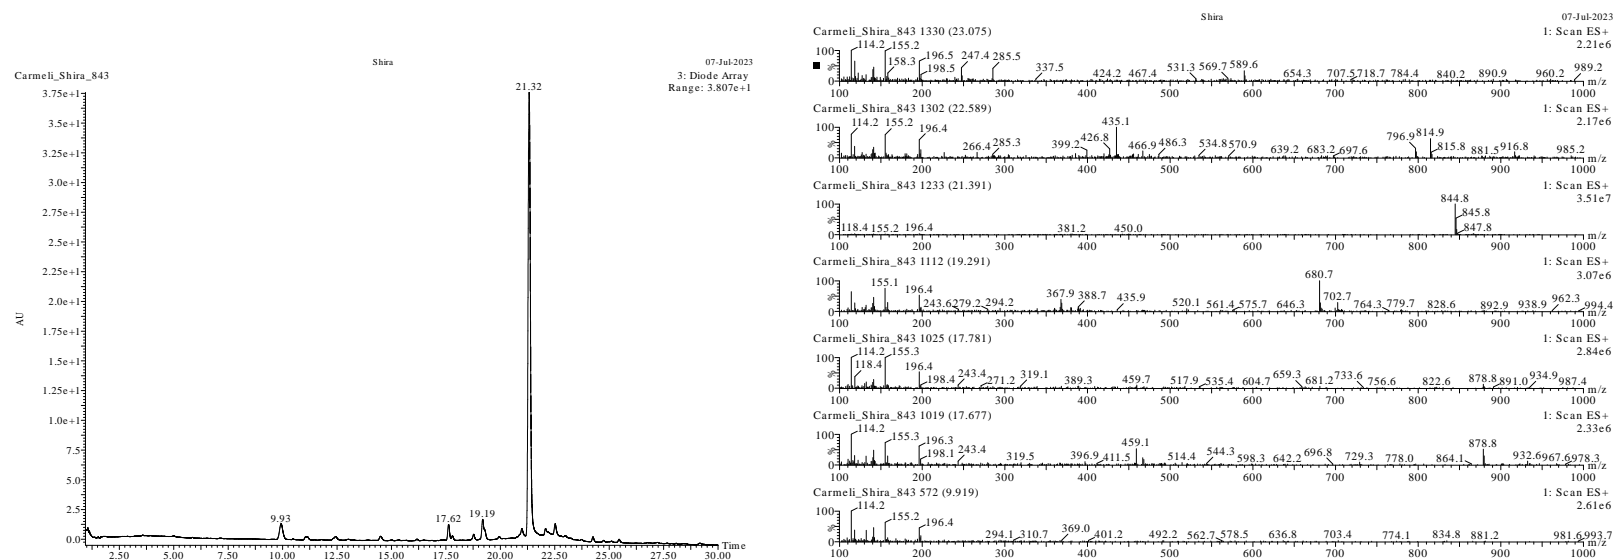

Figure S80.  $^1\text{H}$  NMR Spectrum of Anabaenopeptin B (**8**) in  $\text{DMSO}-d_6$

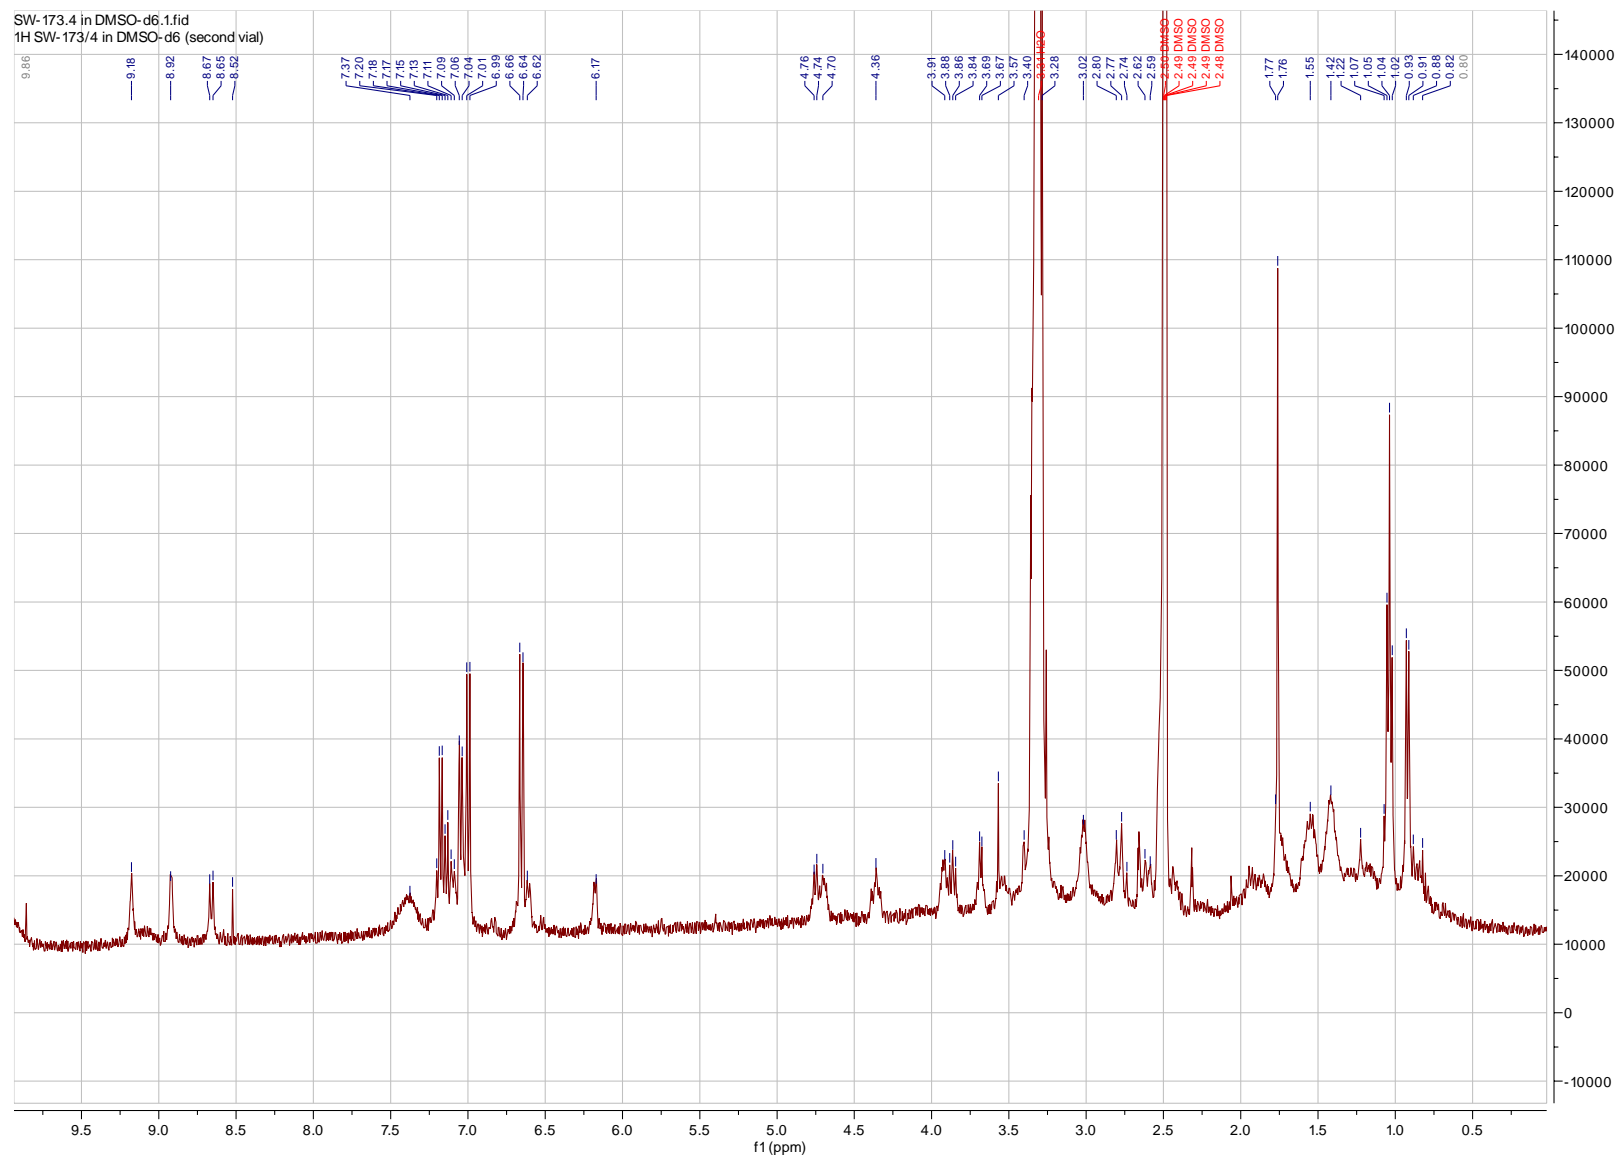

Figure S81.  $^{13}\text{C}$  NMR Spectrum of Anabaenopeptin B (**8**) in  $\text{DMSO}-d_6$

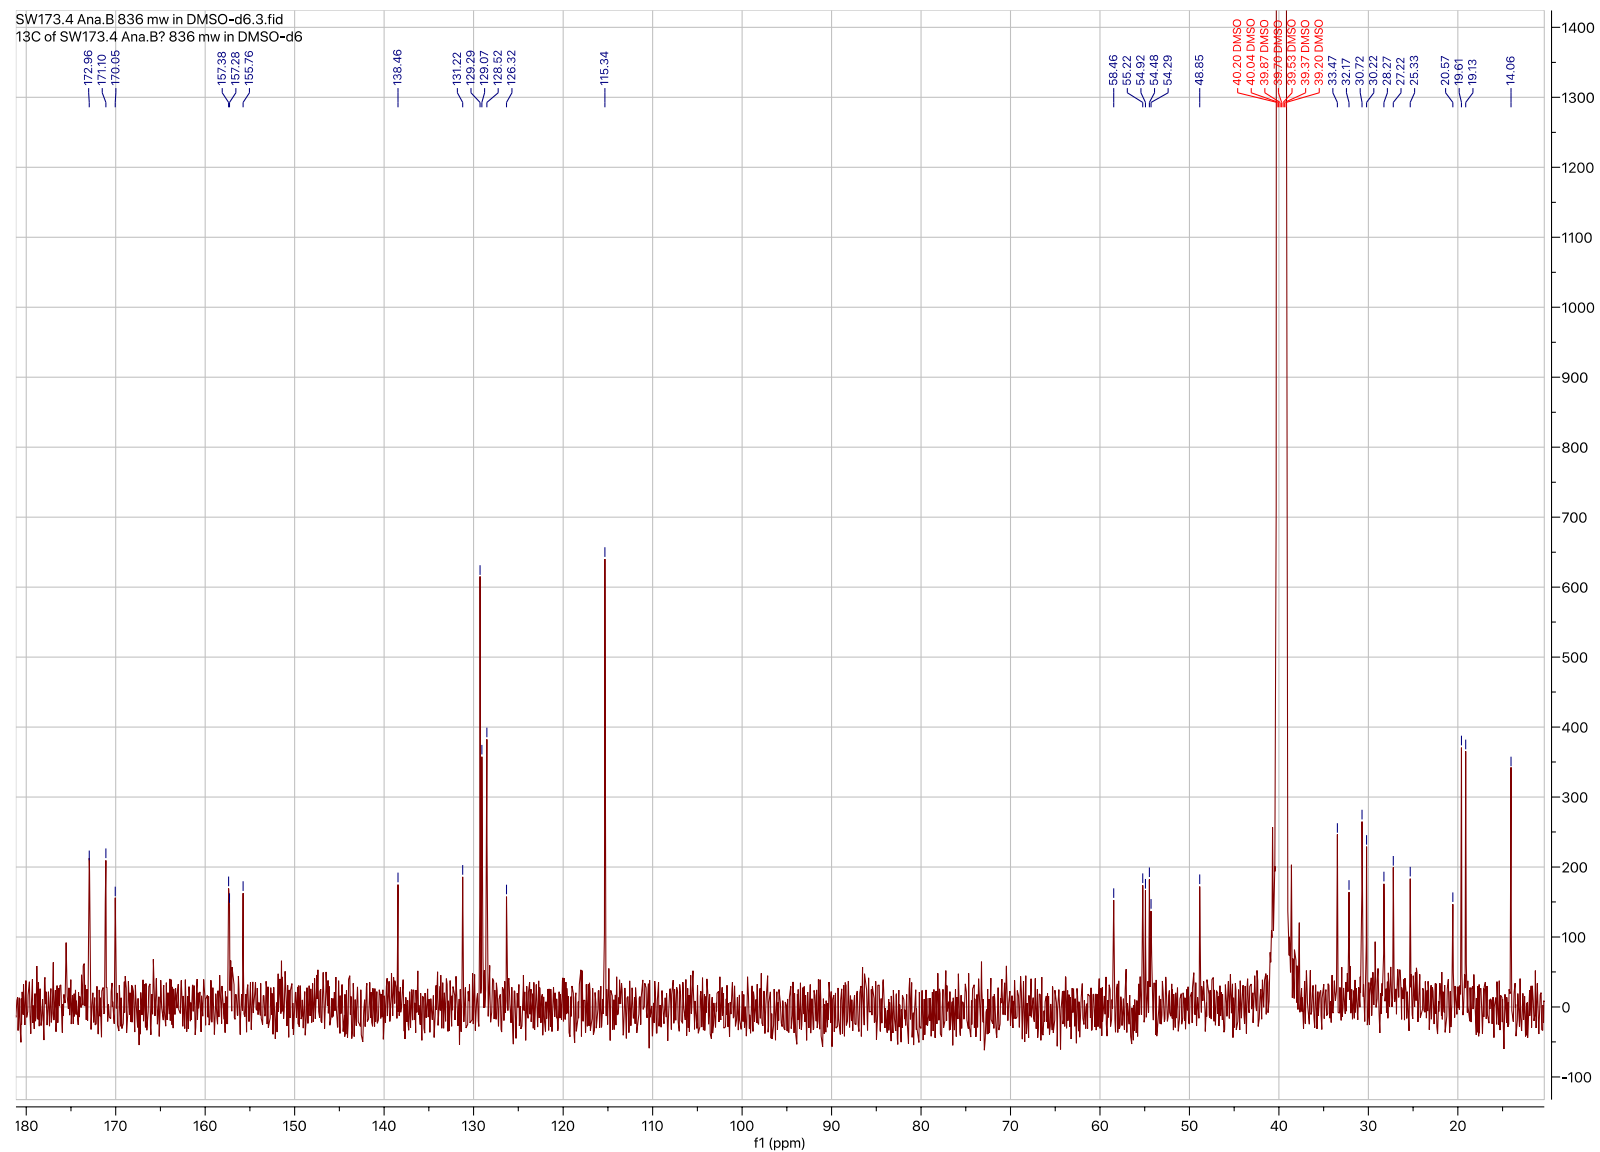

Figure S82. Positive HR ESI MS of Anabaenopeptin B (8)

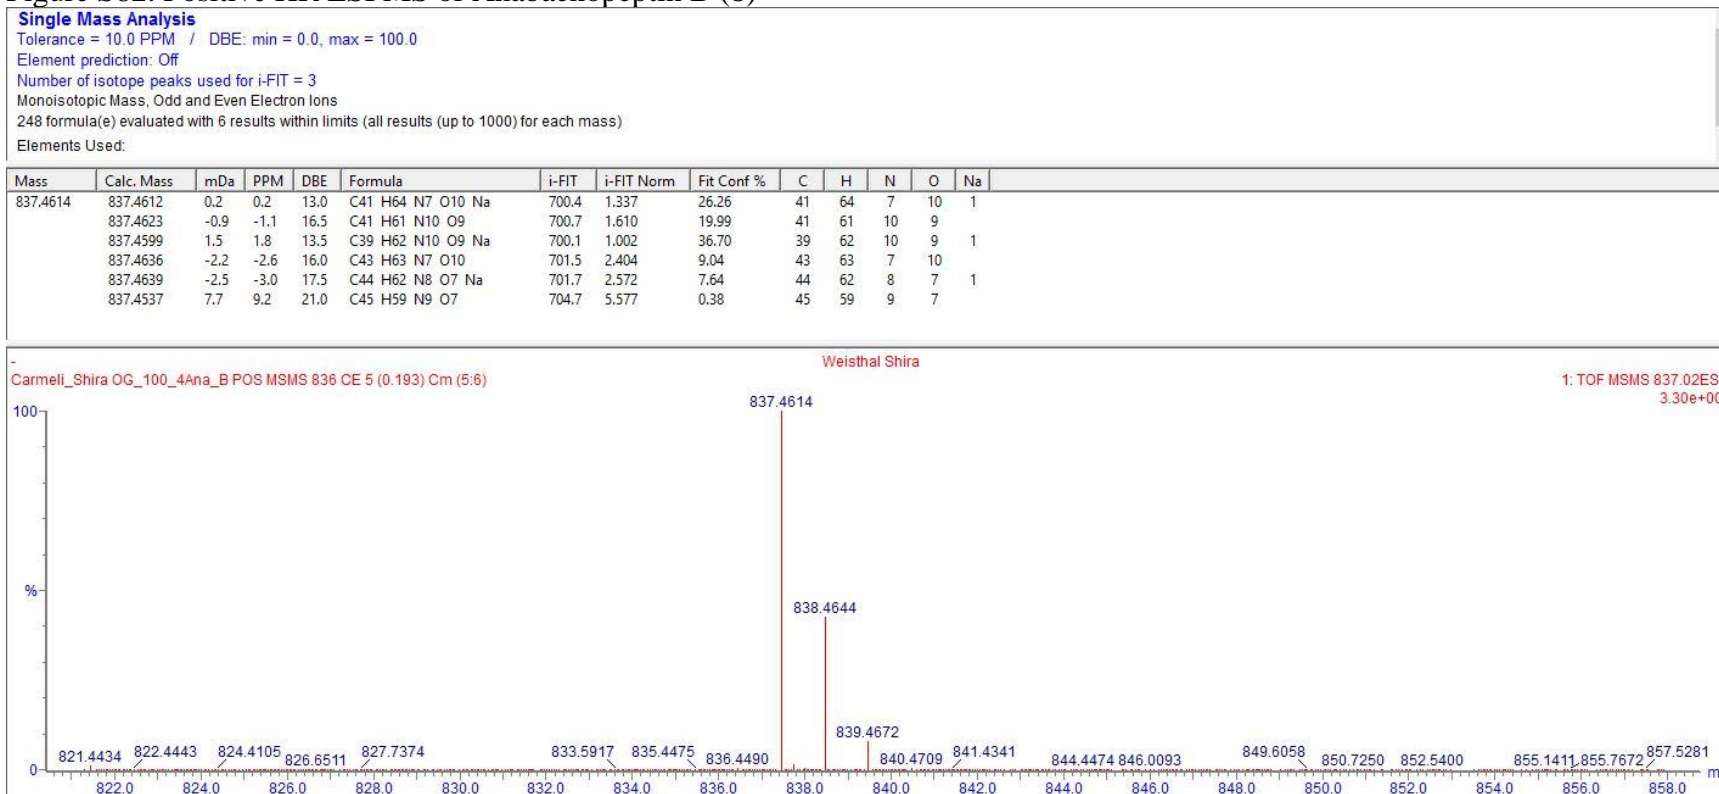

Figure S83. Positive HR ESI MS/MS Spectrum of Anabaenopeptin B (8)

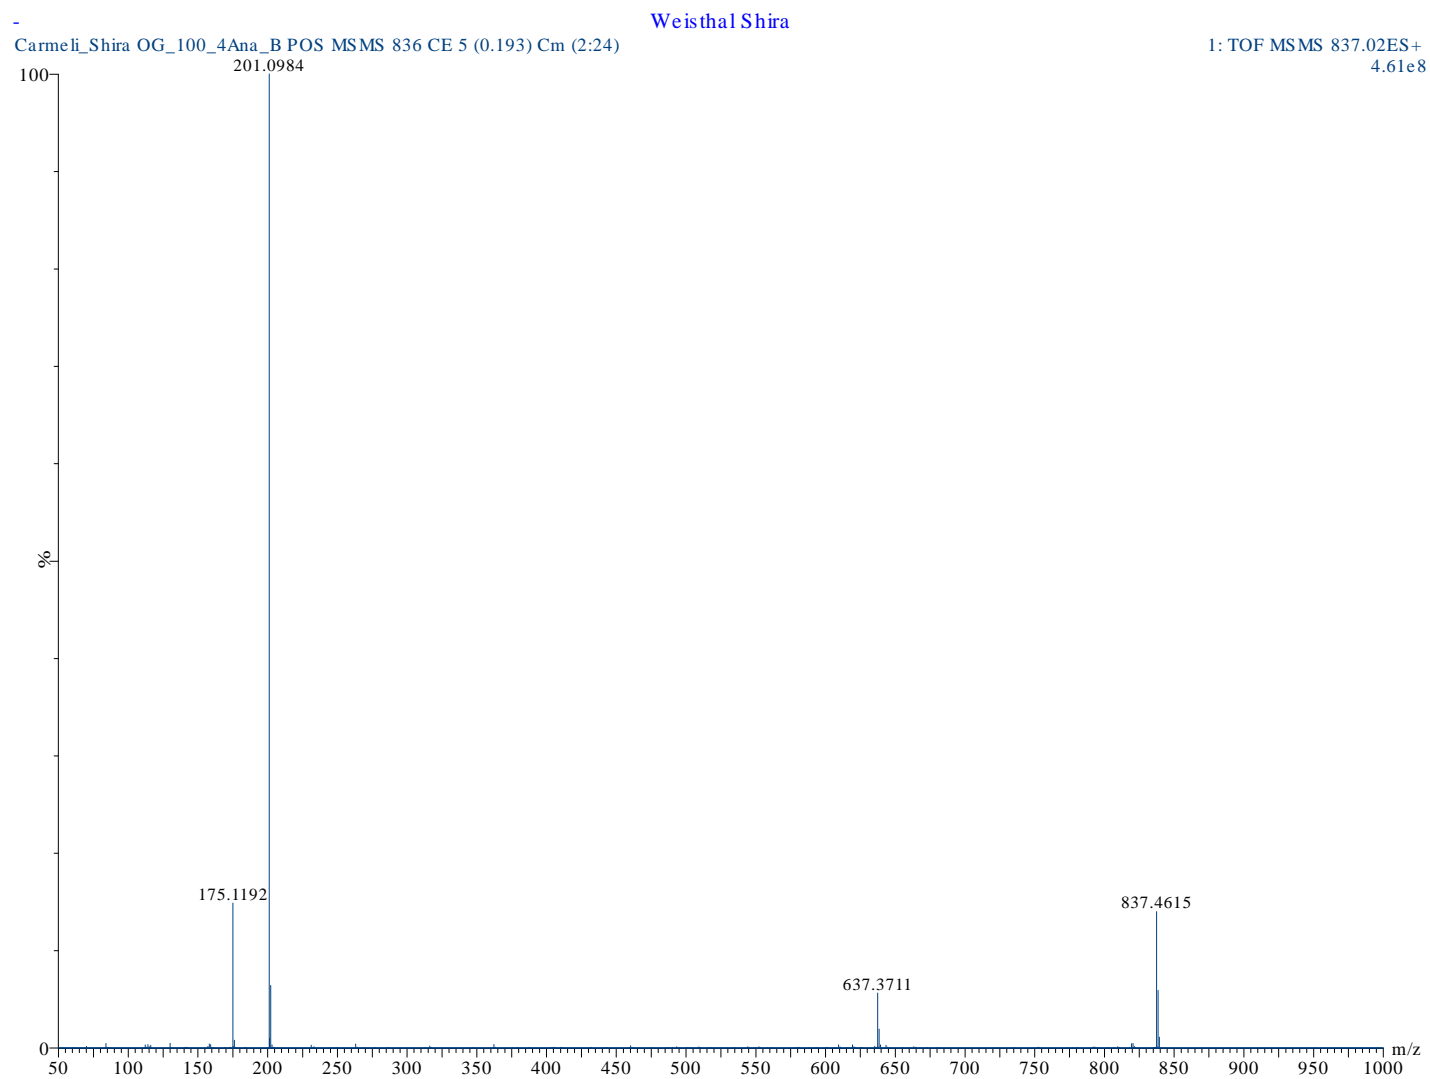



Figure S84. Scheme of Fragmentation in the Positive HR ESI MS/MS Spectrum of Anabaenopeptin B (**8**)

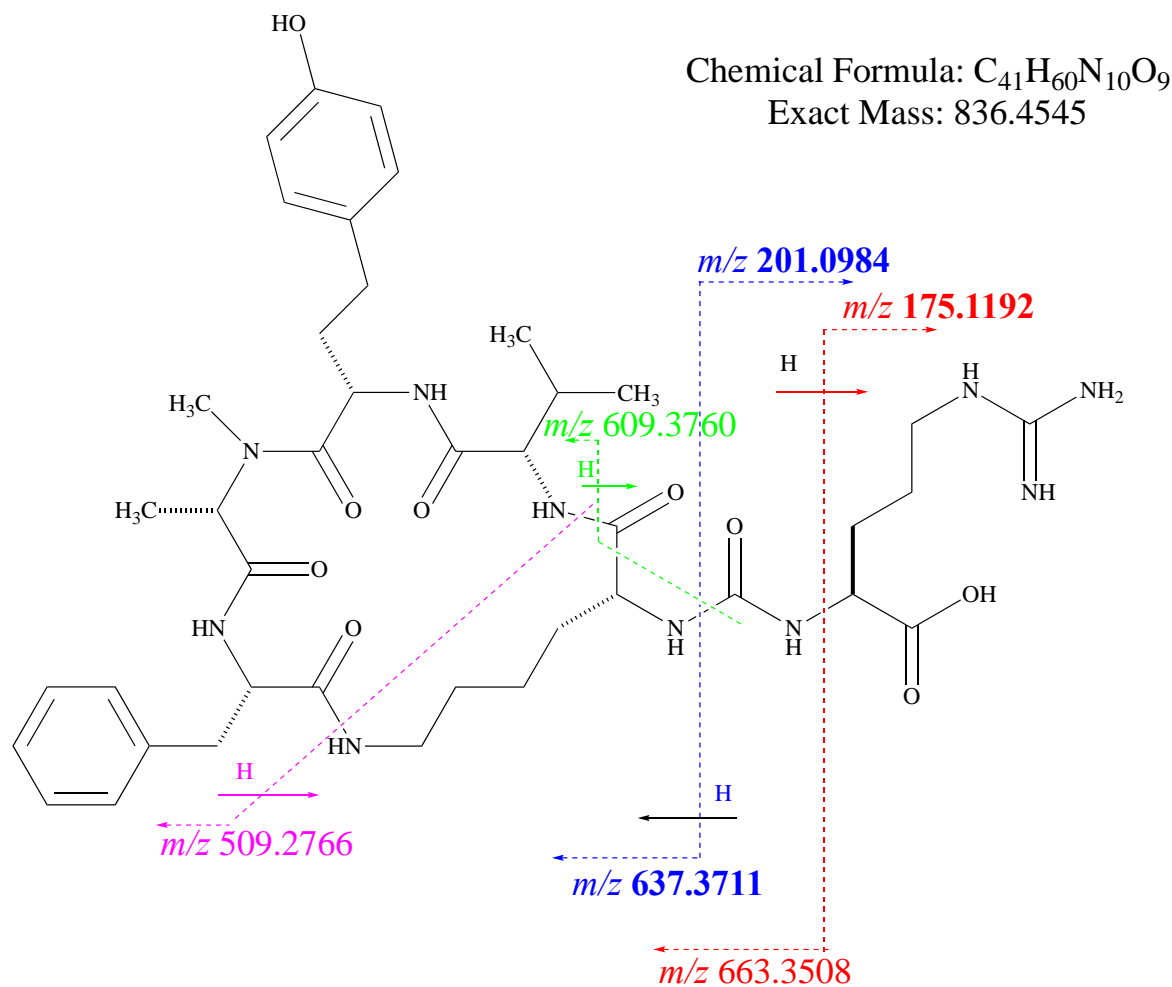

Figure S85. LCMS Traces of Marfey's Method Amino Acids Analysis of Anabaenopeptin B (8)

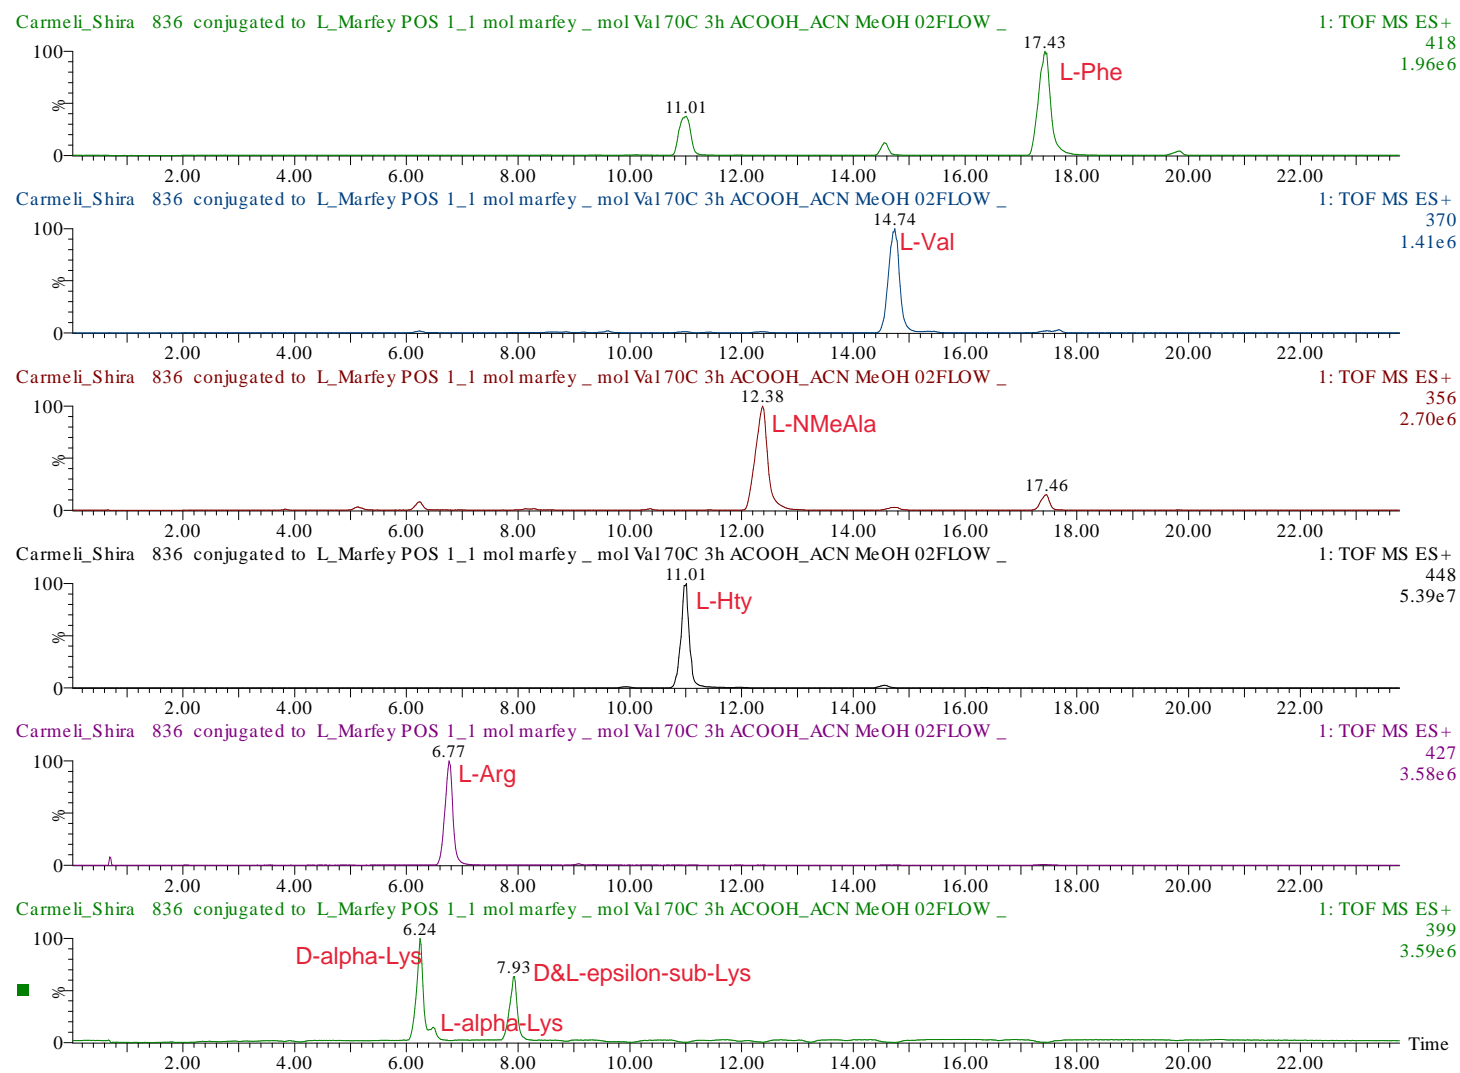

Figure S86. LCMS Chromatogram and Mass spectrum of Anabaenopeptin B (8)

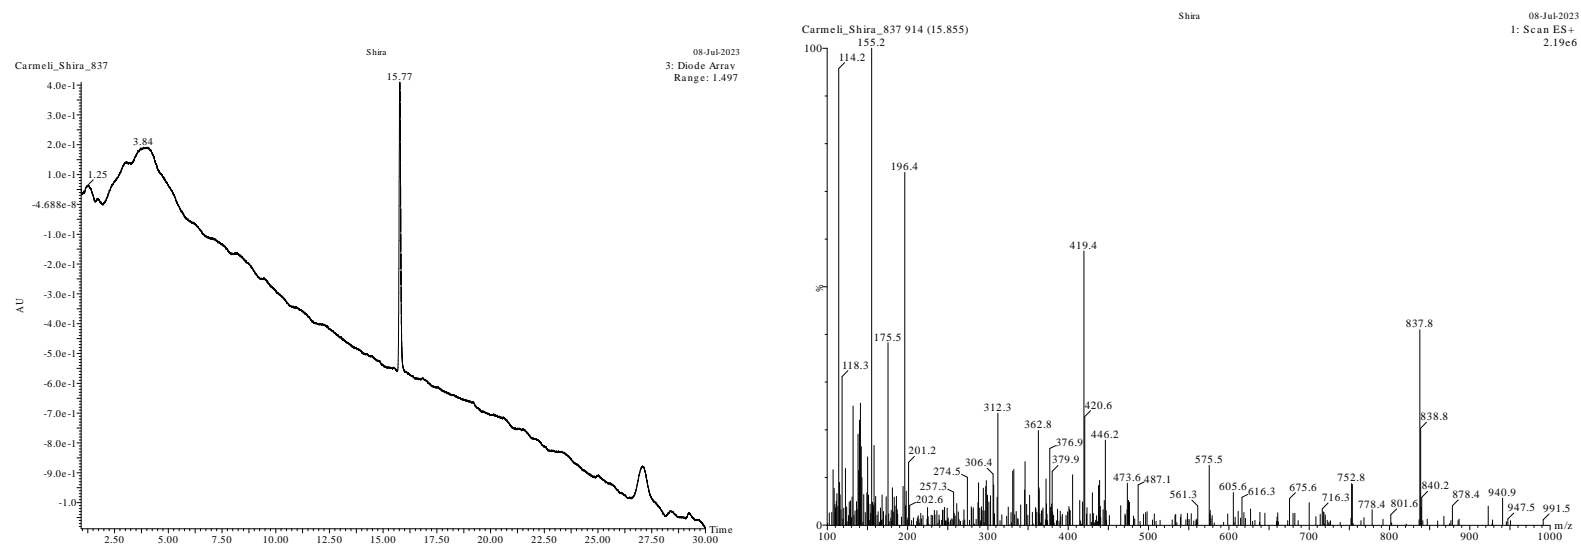

Figure S87.  $^1\text{H}$  NMR Spectrum of Anabaenopeptin F (**9**) in  $\text{DMSO}-d_6$

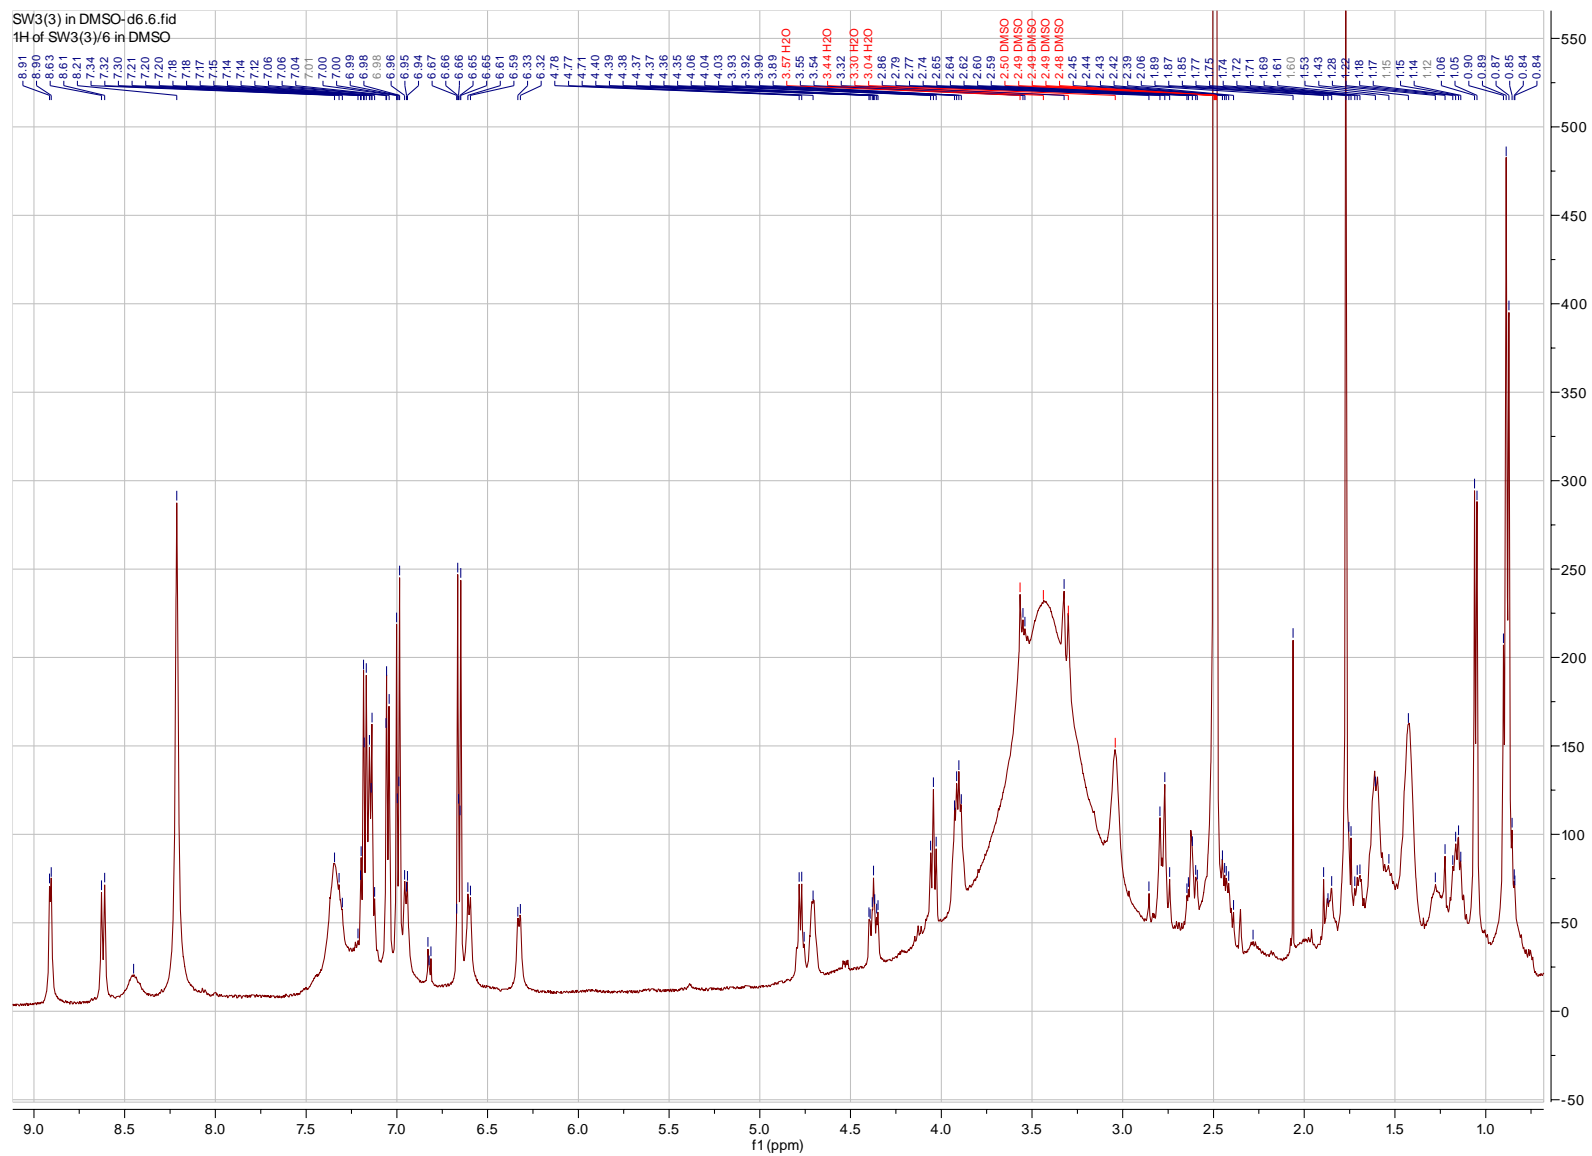

Figure S88. Positive HR ESI MS of Anabaenopeptin F (9)

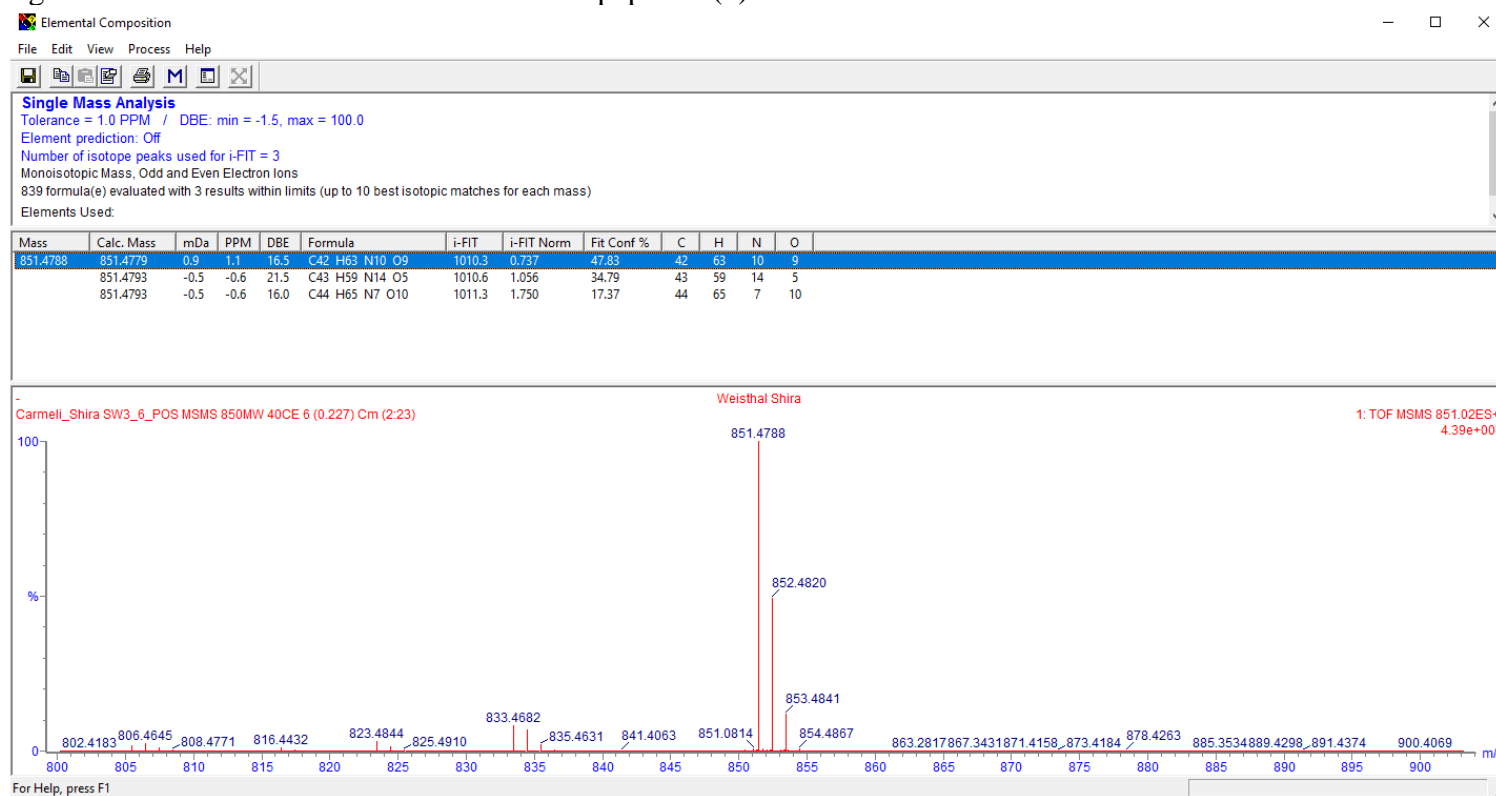

Figure S89. Positive HR ESI MS/MS Spectrum of Anabaenopeptin F (9)

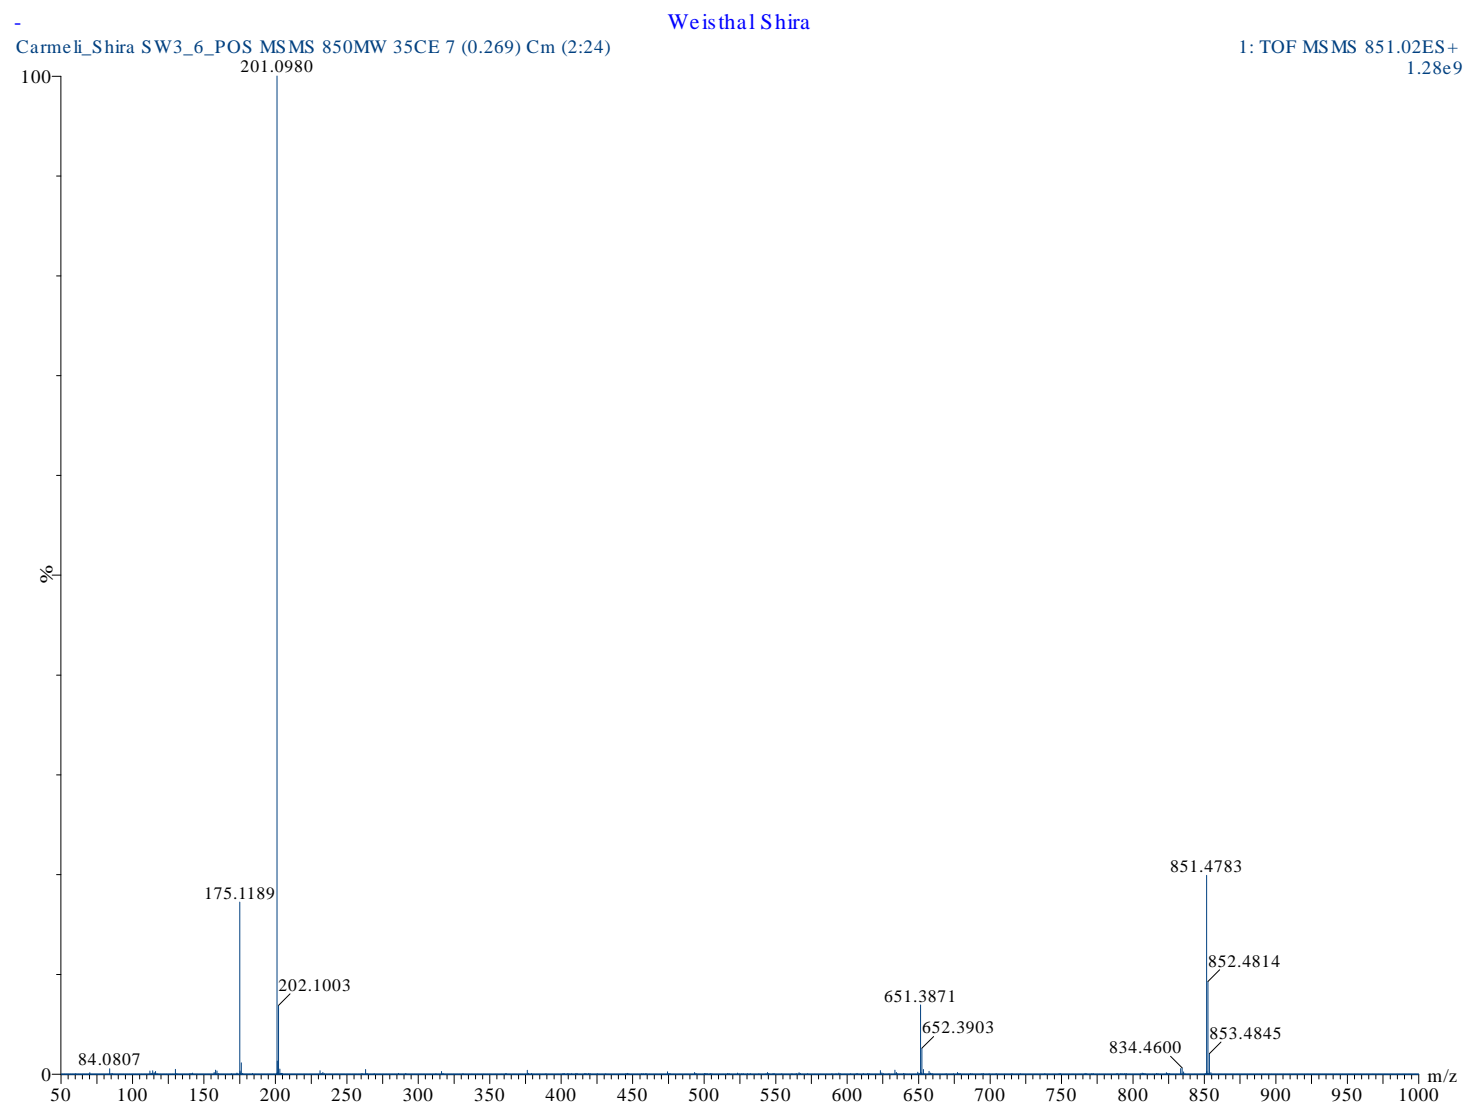

Figure S90. Scheme of Fragmentation in the Positive HR ESI MS/MS Spectrum of Anabaenopeptin F (9)

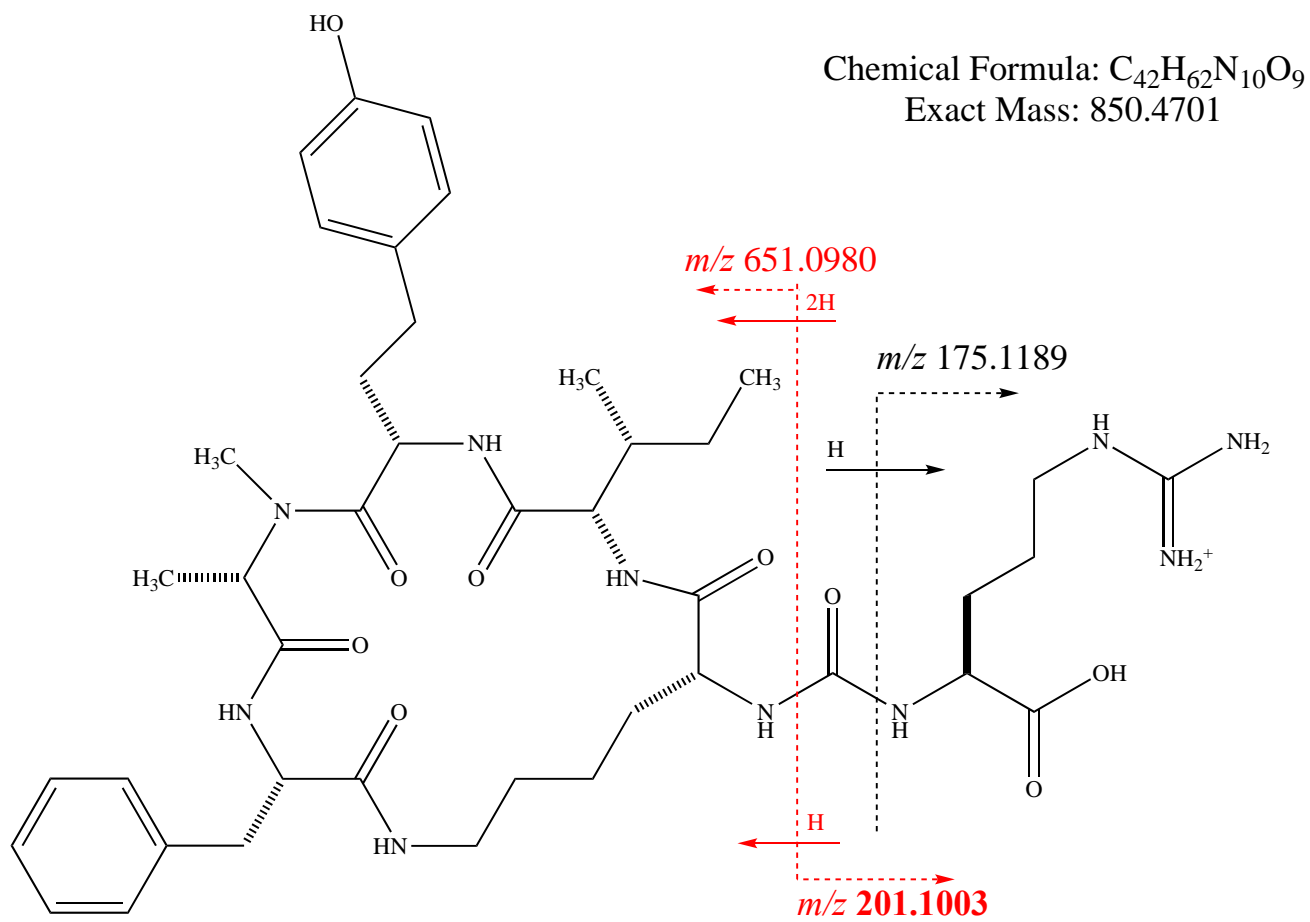

Figure S91. LCMS Traces of Marfey's Method Amino Acids Analysis of Anabaenopeptin F (9)

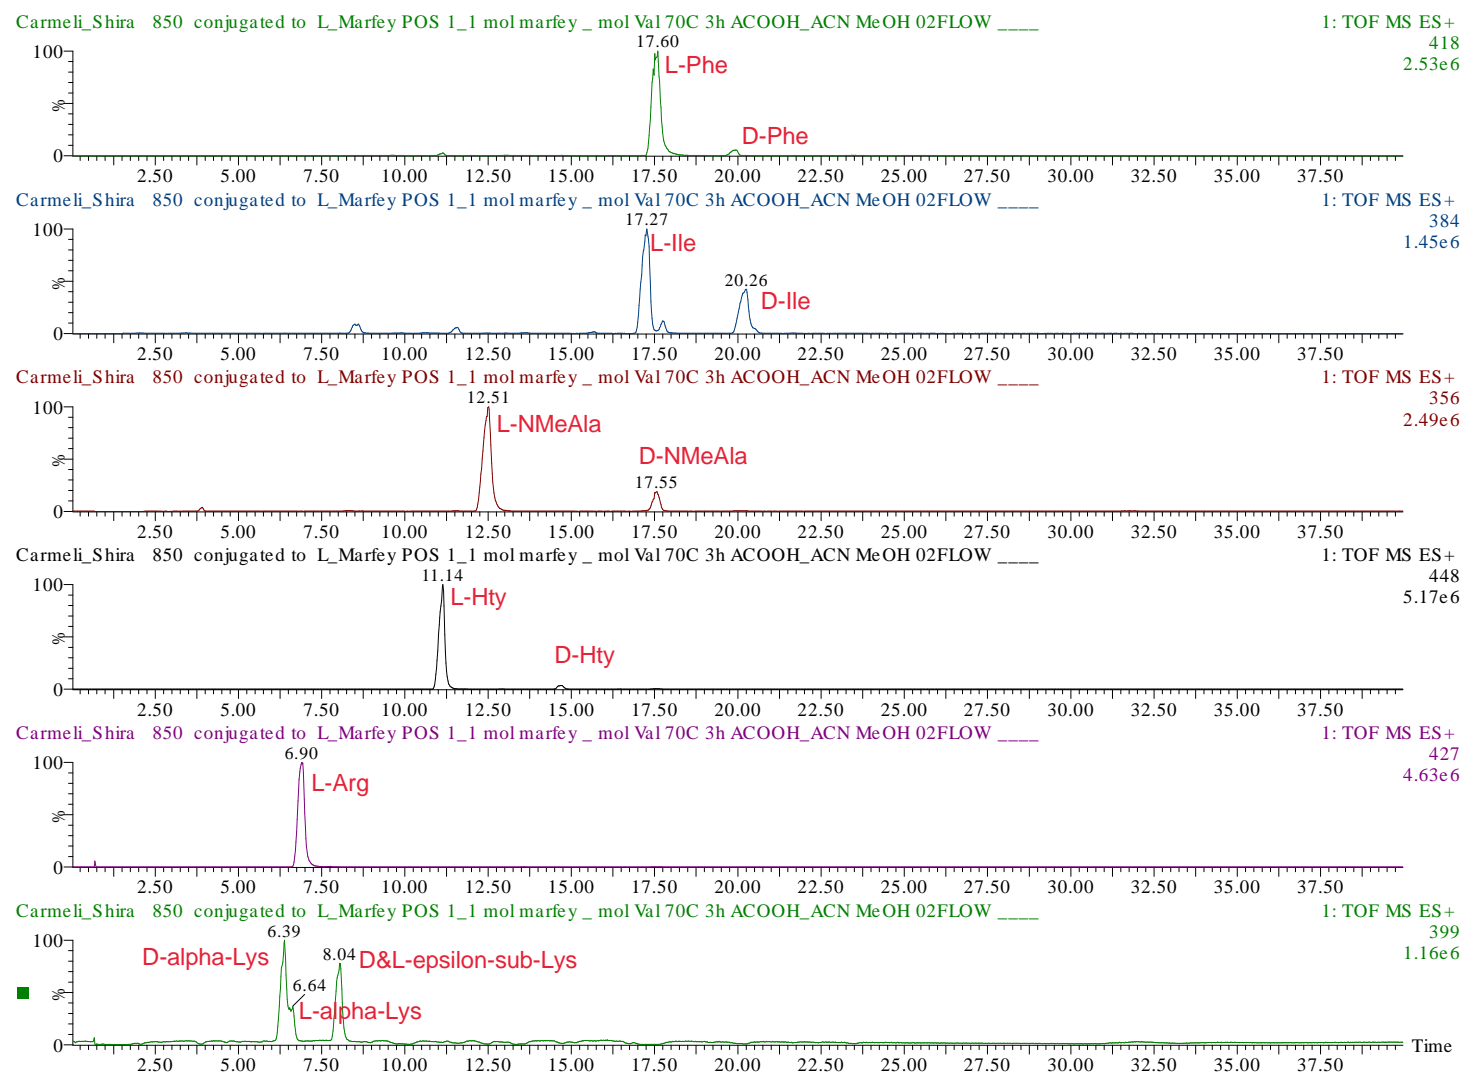



Figure S92. LCMS Chromatogram and Mass spectrum of Anabaenopeptin F (9)

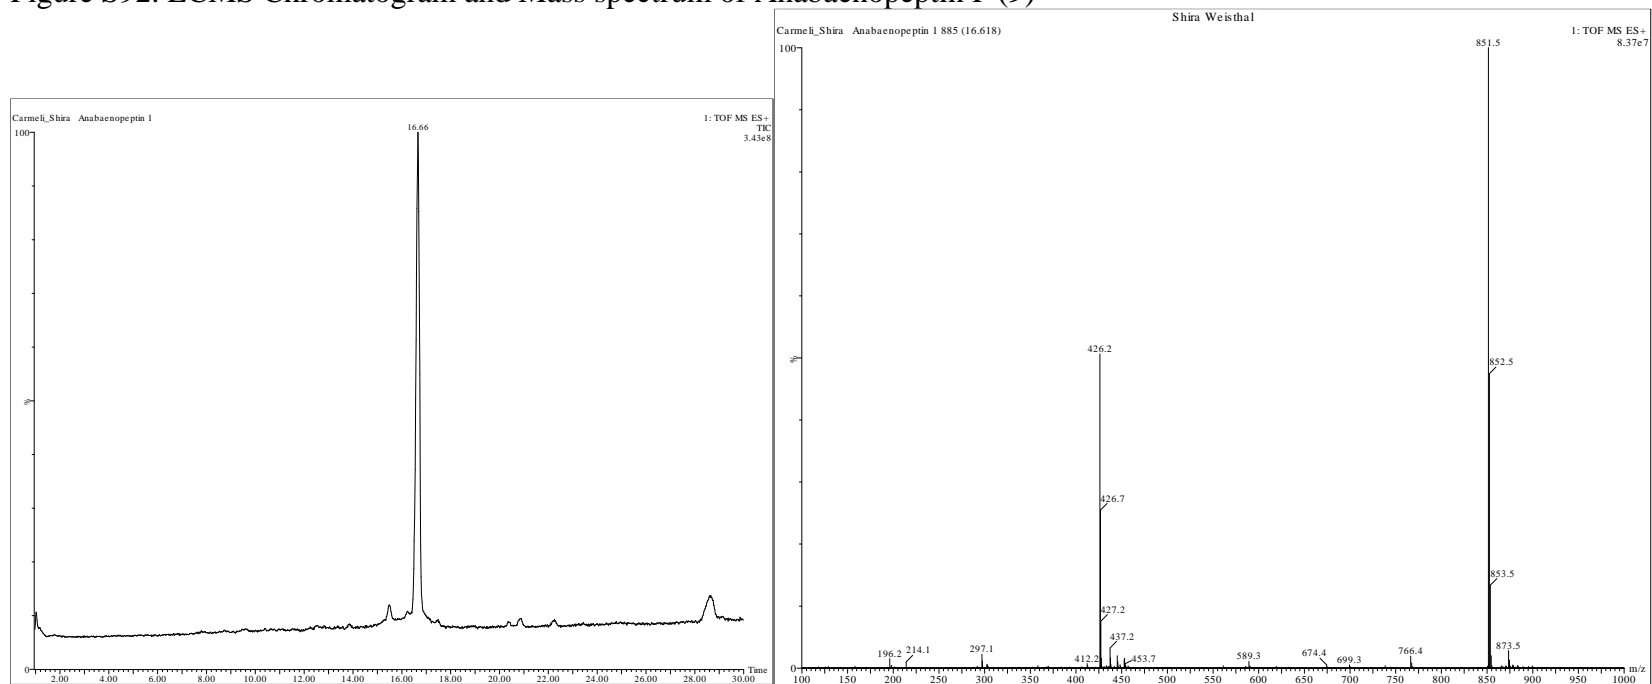

Figure S93.  $^1\text{H}$  NMR Spectrum of Oscillamide Y (**10**) in  $\text{DMSO}-d_6$

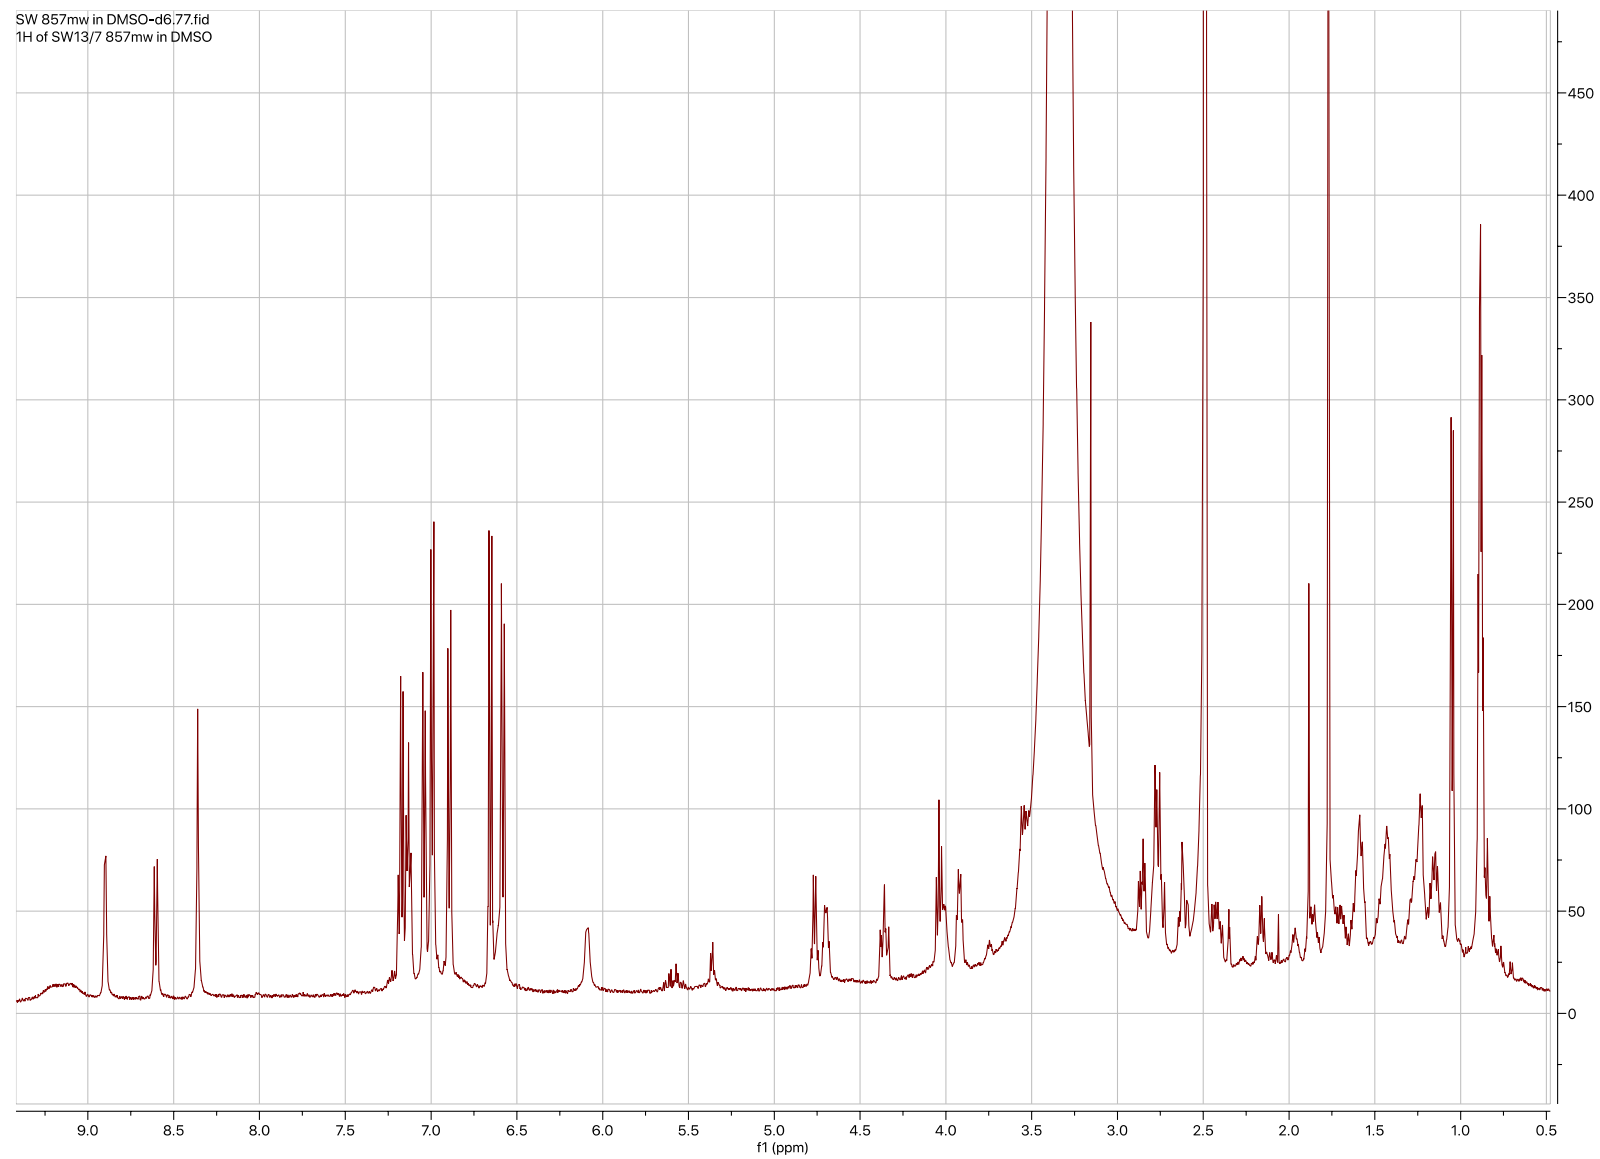

Figure S94. Negative HR ESI MS of Oscillamide Y (10)

**Single Mass Analysis**

Tolerance = 3.0 PPM / DBE: min = -1.5, max = 50.0

Element prediction: Off

Number of isotope peaks used for i-FIT = 3

Monoisotopic Mass, Odd and Even Electron Ions

645 formula(e) evaluated with 5 results within limits (all results (up to 1000) for each mass)

Elements Used:

| Mass     | Calc. Mass | mDa  | PPM  | DBE  | Formula        | i-FIT | i-FIT Norm | Fit Conf % | C  | H  | N  | O  |
|----------|------------|------|------|------|----------------|-------|------------|------------|----|----|----|----|
| 856.4249 | 856.4245   | 0.4  | 0.5  | 20.5 | C45 H58 N7 O10 | 47.4  | 0.000      | 100.00     | 45 | 58 | 7  | 10 |
|          | 856.4245   | 0.4  | 0.5  | 26.0 | C44 H52 N14 O5 | 68.1  | 20.690     | 0.00       | 44 | 52 | 14 | 5  |
|          | 856.4259   | -1.0 | -1.2 | 25.5 | C46 H54 N11 O6 | 70.3  | 22.918     | 0.00       | 46 | 54 | 11 | 6  |
|          | 856.4232   | 1.7  | 2.0  | 21.0 | C43 H56 N10 O9 | 69.7  | 22.304     | 0.00       | 43 | 56 | 10 | 9  |
|          | 856.4272   | -2.3 | -2.7 | 25.0 | C48 H56 N8 O7  | 74.6  | 27.193     | 0.00       | 48 | 56 | 8  | 7  |

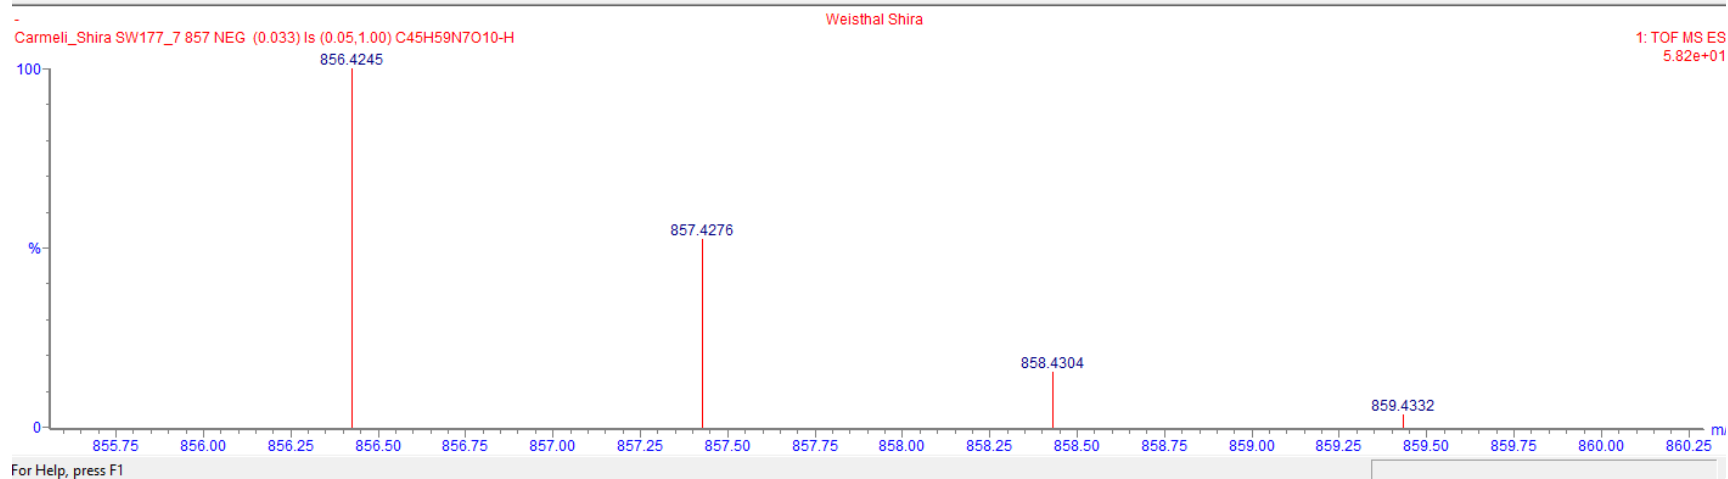

Figure S95. Positive HR ESI MS/MS Spectrum of Oscillamide Y (**10**)

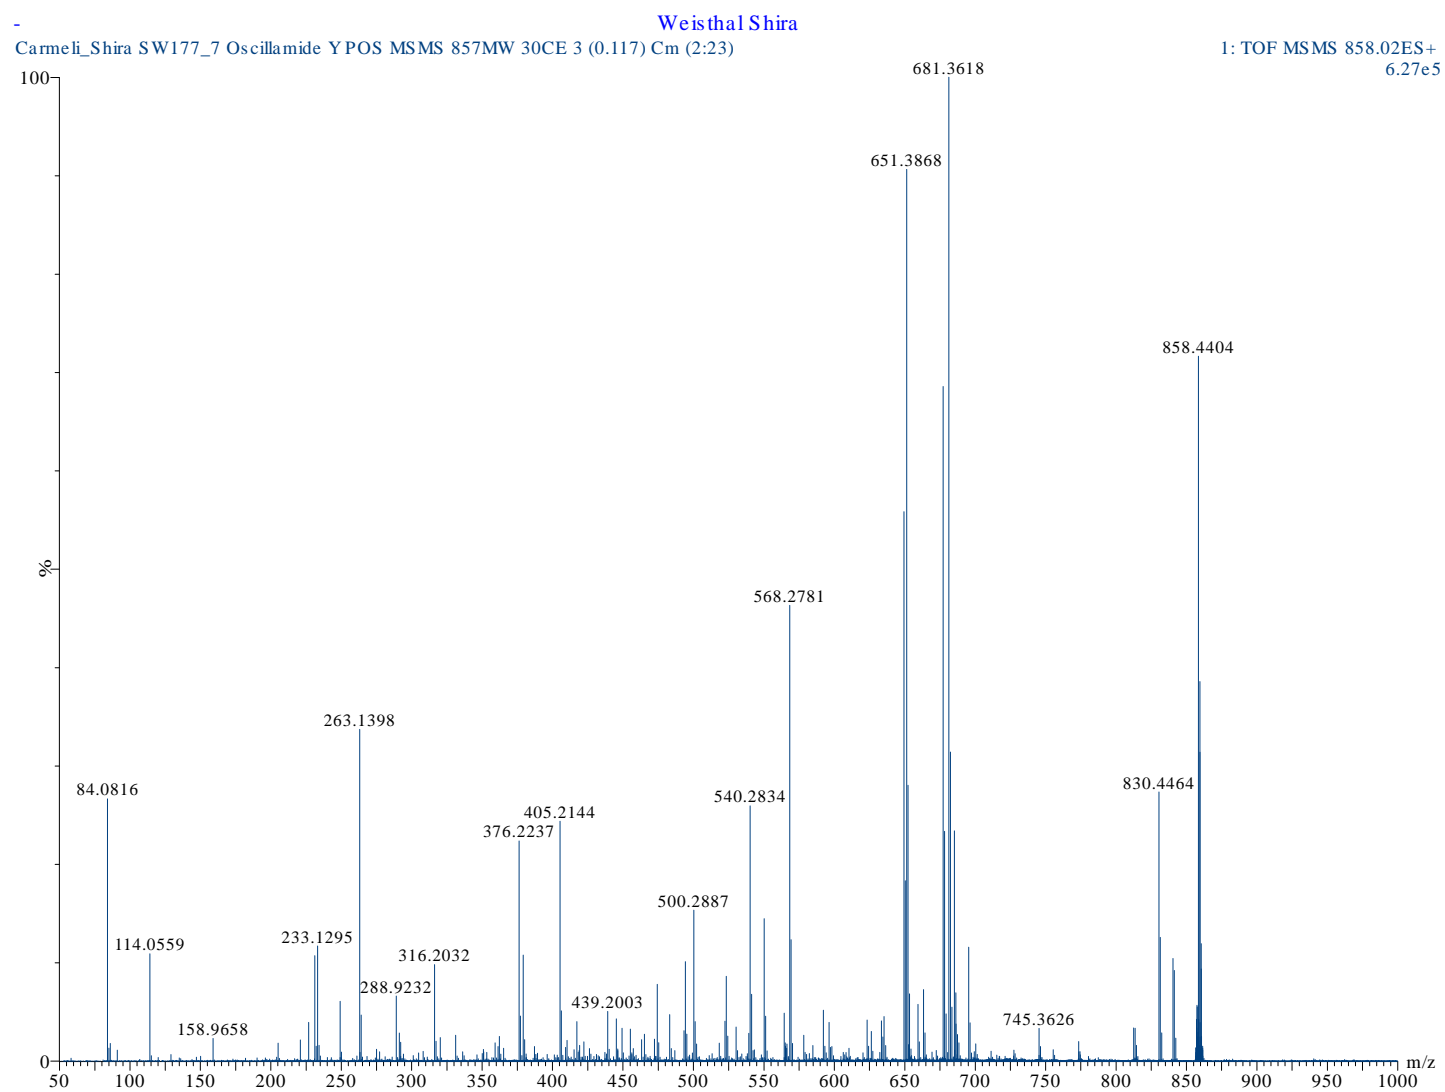

Figure S96. Scheme of Fragmentation in the Positive HR ESI MS/MS Spectrum of Oscillamide Y (**10**)

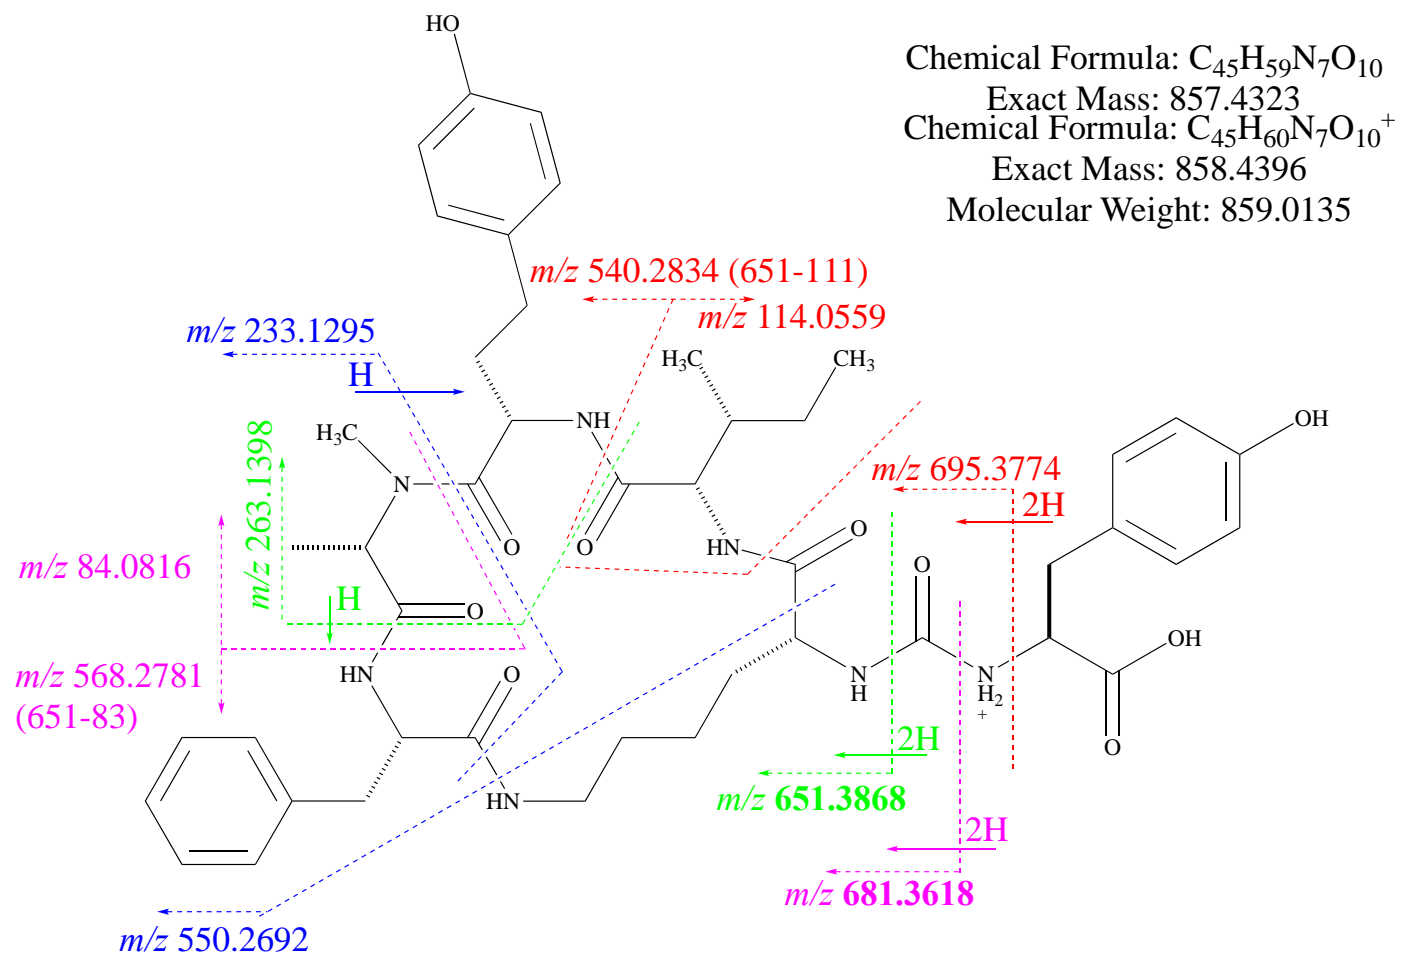

Figure S97. LCMS Traces of Marfey's Method Amino Acids Analysis of Oscillamide Y (10)

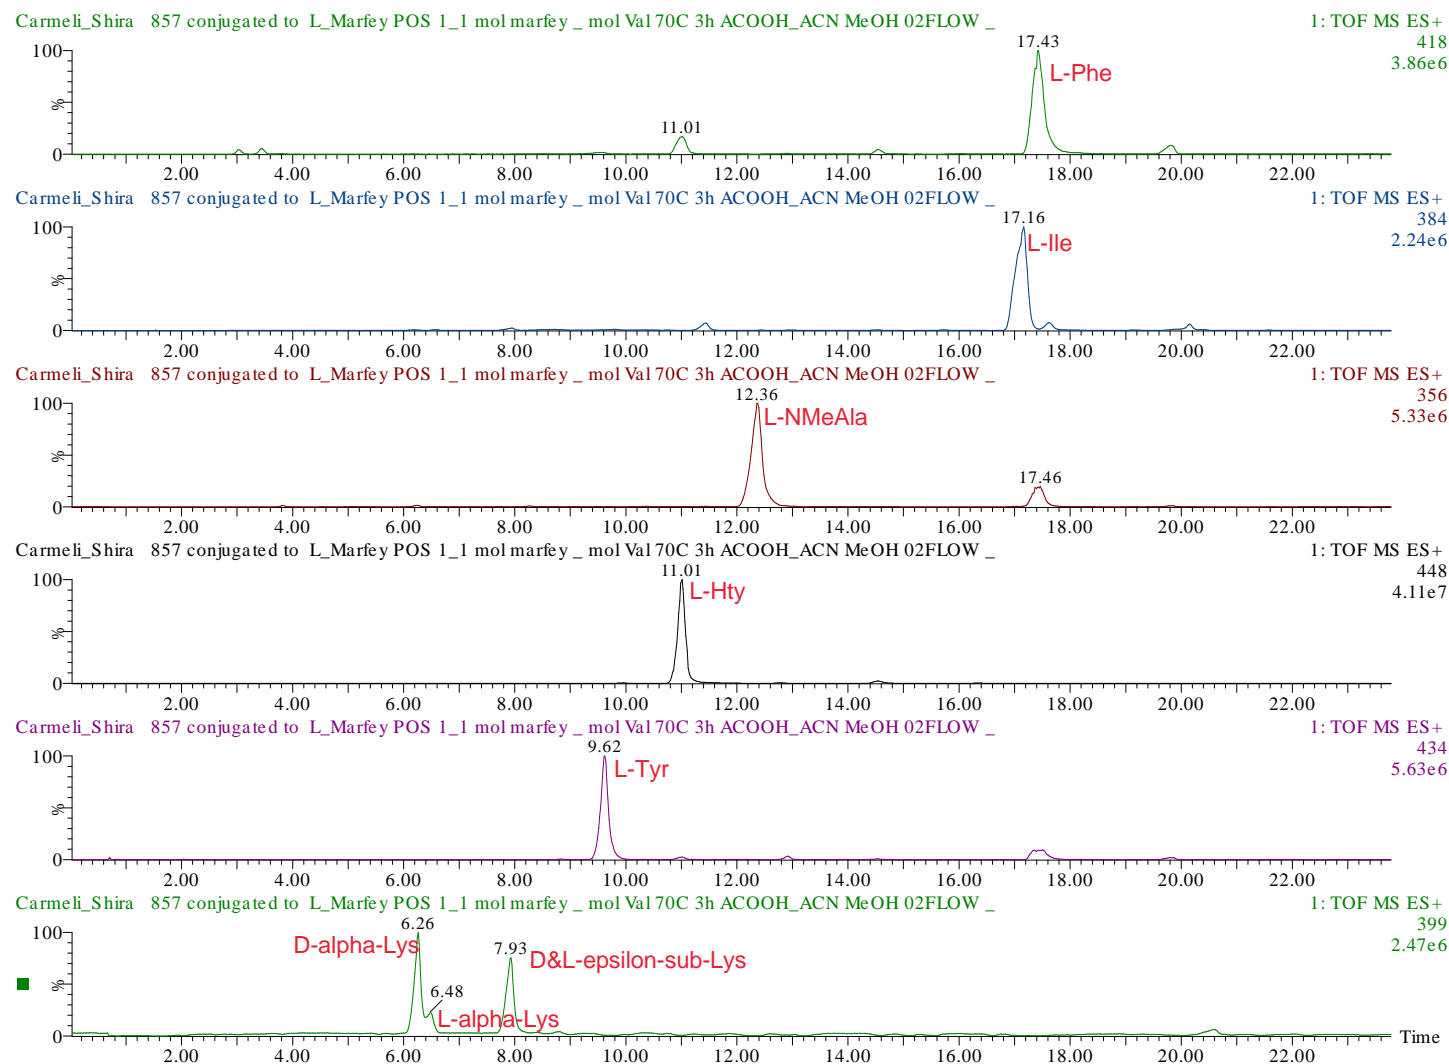

Figure S98. LCMS Chromatogram and Mass spectrum of Oscillamide Y (**10**)

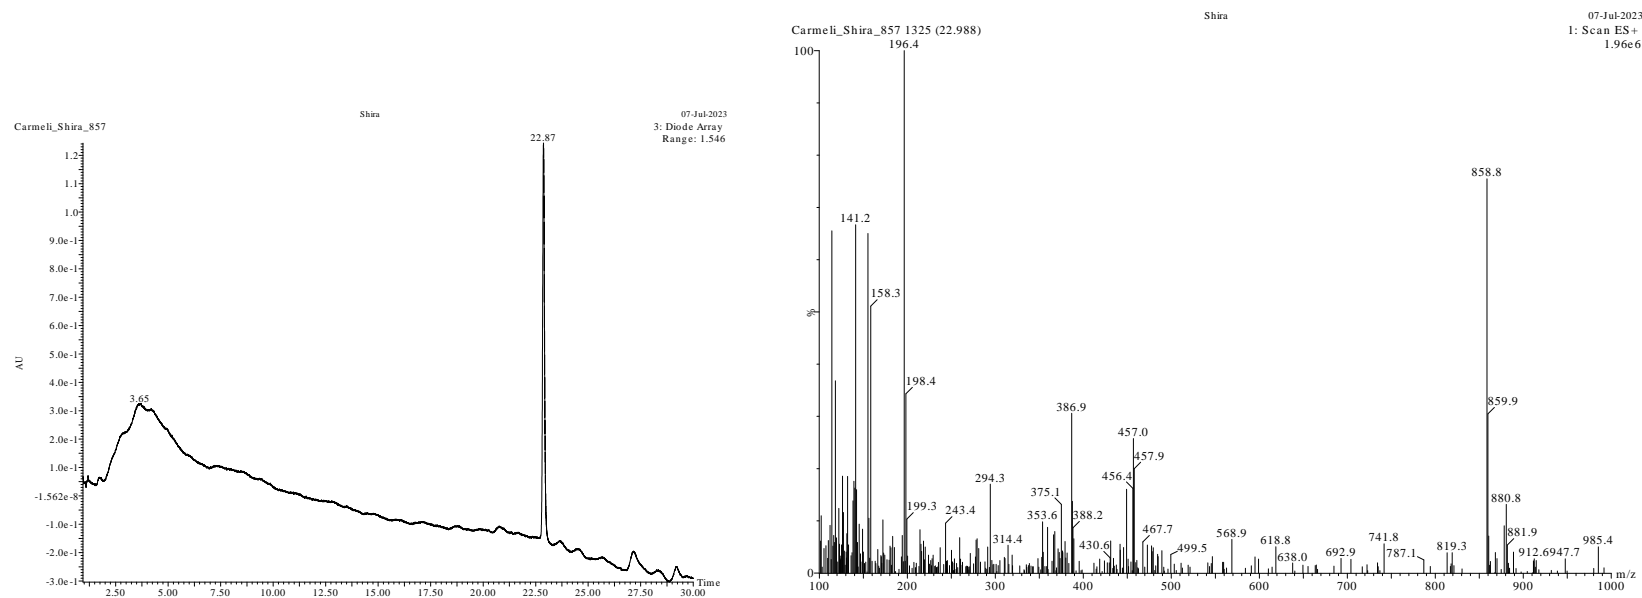

Supplement: s1 [file s1]
